# Supplementary material for: From Discrete Complexes to Metal–Organic Layered Materials: Remarkable Hydrogen Bonding Frameworks
Source: MDPI journal article supplement (doi:10.3390/molecules25061353), 2020-03-16

# checkCIF/PLATON report

Structure factors have been supplied for datablock(s) I

THIS REPORT IS FOR GUIDANCE ONLY. IF USED AS PART OF A REVIEW PROCEDURE FOR PUBLICATION, IT SHOULD NOT REPLACE THE EXPERTISE OF AN EXPERIENCED CRYSTALLOGRAPHIC REFEREE.

No syntax errors found.      CIF dictionary      Interpreting this report

## Datablock: I

---

Bond precision:    C-C = 0.0094 Å

Wavelength=0.71073

Cell:                a=10.9458(4)                b=11.9419(4)                c=13.4085(5)  
                      alpha=64.178(1)        beta=79.870(2)        gamma=77.179(1)  
Temperature:        150 K

|                        | Calculated                                | Reported                                  |
|------------------------|-------------------------------------------|-------------------------------------------|
| Volume                 | 1532.06(10)                               | 1532.06(10)                               |
| Space group            | P 1                                       | P 1                                       |
| Hall group             | P 1                                       | P 1                                       |
| Moiety formula         | C40 H40 Ba2 N6 O15, 2(C12 H8 N2), 2(H2 O) | C40 H40 Ba2 N6 O15, 2(C12 H8 N2), 2(H2 O) |
| Sum formula            | C64 H60 Ba2 N10 O17                       | C64 H60 Ba2 N10 O17                       |
| Mr                     | 1515.88                                   | 1515.90                                   |
| Dx, g cm <sup>-3</sup> | 1.643                                     | 1.643                                     |
| Z                      | 1                                         | 1                                         |
| Mu (mm <sup>-1</sup> ) | 1.359                                     | 1.359                                     |
| F000                   | 762.0                                     | 762.0                                     |
| F000'                  | 761.68                                    |                                           |
| h,k,lmax               | 14,15,17                                  | 14,15,17                                  |
| Nref                   | 14070[ 7035]                              | 13072                                     |
| Tmin,Tmax              | 0.770,0.873                               | 0.763,0.876                               |
| Tmin'                  | 0.752                                     |                                           |

Correction method= MULTI-SCAN

Data completeness= 1.86/0.93

Theta(max)= 27.480

R(reflections)= 0.0296( 12197)

wR2(reflections)= 0.0597( 13072)

S = 1.041

Npar= Npar = 904

---

The following ALERTS were generated. Each ALERT has the format

**test-name\_ALERT\_alert-type\_alert-level.**

Click on the hyperlinks for more details of the test.

---

### 🔴 Alert level A

|                   |                                                |      |    |      |    |         |       |
|-------------------|------------------------------------------------|------|----|------|----|---------|-------|
| PLAT417_ALERT_2_A | Short Inter D-H..H-D                           | H14W | .. | H15W | .. | 1.40    | Ang.  |
| PLAT924_ALERT_1_A | The Reported and Calculated Rho(min) Differ by |      |    |      |    | 8.45    | eA-3  |
| PLAT927_ALERT_1_A | Reported and Calculated wR2 Differ by          |      |    |      |    | -0.0579 | Check |
| PLAT974_ALERT_2_A | Check Calcd Negative Residual Density on       |      |    | Ba2  |    | -8.86   | eA-3  |
| PLAT974_ALERT_2_A | Check Calcd Negative Residual Density on       |      |    | Ba1  |    | -8.69   | eA-3  |

---

### 🟡 Alert level B

|                   |                                            |     |   |      |       |         |       |
|-------------------|--------------------------------------------|-----|---|------|-------|---------|-------|
| PLAT420_ALERT_2_B | D-H Without Acceptor                       | O1W | - | H2W  | ...   | Please  | Check |
| PLAT420_ALERT_2_B | D-H Without Acceptor                       | O3W | - | H6W  | ...   | Please  | Check |
| PLAT420_ALERT_2_B | D-H Without Acceptor                       | O4W | - | H7W  | ...   | Please  | Check |
| PLAT420_ALERT_2_B | D-H Without Acceptor                       | O5W | - | H10W | ...   | Please  | Check |
| PLAT420_ALERT_2_B | D-H Without Acceptor                       | O8W | - | H16W | ...   | Please  | Check |
| PLAT910_ALERT_3_B | Missing # of FCF Reflections Below Th(Min) |     |   |      | ..... | 17      | Why ? |
| PLAT926_ALERT_1_B | Reported and Calculated R1 Differ by       |     |   |      | ..... | -0.0244 | Check |
| PLAT928_ALERT_1_B | Reported and Calculated S value Differ by  |     |   |      |       | -1.008  |       |

---

### 🟢 Alert level C

|                   |                                             |       |                                  |                   |       |        |        |
|-------------------|---------------------------------------------|-------|----------------------------------|-------------------|-------|--------|--------|
| PLAT036_ALERT_1_C | No s.u. Given for Flack Parameter           |       |                                  |                   |       | Please | Do !   |
| PLAT090_ALERT_3_C | Poor Data / Parameter Ratio (Zmax > 18)     |       |                                  |                   |       | 7.74   | Note   |
| PLAT094_ALERT_2_C | Ratio of Maximum / Minimum Residual Density |       |                                  |                   | ....  | 2.06   | Why ?  |
| PLAT213_ALERT_2_C | Atom N1                                     |       | has                              | ADP max/min Ratio | ..... | 3.1    | prolat |
| PLAT213_ALERT_2_C | Atom C61                                    |       | has                              | ADP max/min Ratio | ..... | 3.8    | prolat |
| PLAT220_ALERT_2_C | Large Non-Solvent N                         |       | Ueq(max)/Ueq(min) Range          |                   |       | 3.5    | Ratio  |
| PLAT222_ALERT_3_C | Large Non-Solvent H                         |       | Uiso(max)/Uiso(min)              |                   | ..    | 5.5    | Ratio  |
| PLAT241_ALERT_2_C | High                                        |       | Ueq as Compared to Neighbors for |                   | ..... | C60    | Check  |
| PLAT250_ALERT_2_C | Large U3/U1 Ratio for Average U(i,j) Tensor |       |                                  |                   | ....  | 3.0    | Note   |
| PLAT314_ALERT_2_C | Check Small Angle for H2O: Metal-O1W        |       |                                  | -H2W              |       | 84.22  | Degree |
| PLAT314_ALERT_2_C | Check Small Angle for H2O: Metal-O3W        |       |                                  | -H6W              |       | 88.32  | Degree |
| PLAT314_ALERT_2_C | Check Small Angle for H2O: Metal-O7W        |       |                                  | -H14W             |       | 80.69  | Degree |
| PLAT342_ALERT_3_C | Low Bond Precision on C-C Bonds             |       |                                  |                   | ..... | 0.0094 | Ang.   |
| PLAT369_ALERT_2_C | Long C(sp2)-C(sp2) Bond                     | C9    | -                                | C10               | ...   | 1.55   | Ang.   |
| PLAT417_ALERT_2_C | Short Inter D-H..H-D                        | H5W   | ..                               | H17W              | ..    | 2.12   | Ang.   |
| PLAT480_ALERT_4_C | Long H...A H-Bond Reported                  | H2W   | ..                               | O2W               | ..    | 2.61   | Ang.   |
| PLAT480_ALERT_4_C | Long H...A H-Bond Reported                  | H3W   | ..                               | O1W               | ..    | 2.66   | Ang.   |
| PLAT480_ALERT_4_C | Long H...A H-Bond Reported                  | H5W   | ..                               | N9                | ..    | 2.68   | Ang.   |
| PLAT480_ALERT_4_C | Long H...A H-Bond Reported                  | H9W   | ..                               | N10               | ..    | 2.70   | Ang.   |
| PLAT480_ALERT_4_C | Long H...A H-Bond Reported                  | H14W  | ..                               | O4W               | ..    | 2.63   | Ang.   |
| PLAT480_ALERT_4_C | Long H...A H-Bond Reported                  | H16W  | ..                               | O2W               | ..    | 2.65   | Ang.   |
| PLAT911_ALERT_3_C | Missing # FCF Refl Between THmin & STh/L=   |       |                                  | 0.600             |       | 17     | Why ?  |
| PLAT913_ALERT_3_C | Missing # of Very Strong Reflections in FCF |       |                                  |                   | ....  | 2      | Note   |
| PLAT915_ALERT_3_C | Low Friedel Pair Coverage                   |       |                                  |                   | ..... | 86     | %      |
| PLAT975_ALERT_2_C | Check Calcd Residual Density                | 0.82A | From                             | O2                |       | 0.55   | eA-3   |

---

### 🟠 Alert level G

|                   |                                                  |         |      |       |       |        |       |
|-------------------|--------------------------------------------------|---------|------|-------|-------|--------|-------|
| PLAT002_ALERT_2_G | Number of Distance or Angle Restraints on AtSite |         |      |       |       | 33     | Note  |
| PLAT004_ALERT_5_G | Polymeric Structure Found with Dimension         |         |      |       | ..... | 1      | Info  |
| PLAT005_ALERT_5_G | No _iucr_refine_instructions_details in the CIF  |         |      |       |       | Please | Do !  |
| PLAT066_ALERT_1_G | Predicted and Reported Tmin&Tmax Range Identical |         |      |       |       | ?      | Check |
| PLAT111_ALERT_2_G | ADDSYM Detects (Pseudo) Centre of Symmetry       |         |      |       | ..... | 81     | %Fit  |
| PLAT335_ALERT_2_G | Check Large C6 Ring C-C Range                    | C56     | -    | C61   |       | 0.16   | Ang.  |
| PLAT710_ALERT_4_G | Delete 1-2-3 or 2-3-4 Linear Torsion Angle ... # |         |      |       |       | 210    | Do !  |
|                   | O7 -BA2 -O6 -C9                                  | -8.80   | 1.00 | 1.655 | 1.555 | 1.555  |       |
| PLAT710_ALERT_4_G | Delete 1-2-3 or 2-3-4 Linear Torsion Angle ... # |         |      |       |       | 317    | Do !  |
|                   | BA2 -C16 -C12 -C11                               | -119.10 | 1.90 | 1.455 | 1.555 | 1.555  |       |
| PLAT710_ALERT_4_G | Delete 1-2-3 or 2-3-4 Linear Torsion Angle ... # |         |      |       |       | 320    | Do !  |
|                   | BA2 -C16 -C12 -C13                               | 57.00   | 2.00 | 1.455 | 1.555 | 1.555  |       |
| PLAT790_ALERT_4_G | Centre of Gravity not Within Unit Cell: Resd.    |         |      |       | #     | 3      | Note  |

|                                                                    |            |
|--------------------------------------------------------------------|------------|
| C12 H8 N2                                                          |            |
| PLAT790_ALERT_4_G Centre of Gravity not Within Unit Cell: Resd. #  | 5 Note     |
| H2 O                                                               |            |
| PLAT860_ALERT_3_G Number of Least-Squares Restraints .....         | 36 Note    |
| PLAT912_ALERT_4_G Missing # of FCF Reflections Above STh/L= 0.600  | 12 Note    |
| PLAT916_ALERT_2_G Hooft y and Flack x Parameter values differ by . | 0.31 Check |

---

5 **ALERT level A** = Most likely a serious problem - resolve or explain  
8 **ALERT level B** = A potentially serious problem, consider carefully  
25 **ALERT level C** = Check. Ensure it is not caused by an omission or oversight  
14 **ALERT level G** = General information/check it is not something unexpected

6 ALERT type 1 CIF construction/syntax error, inconsistent or missing data  
24 ALERT type 2 Indicator that the structure model may be wrong or deficient  
8 ALERT type 3 Indicator that the structure quality may be low  
12 ALERT type 4 Improvement, methodology, query or suggestion  
2 ALERT type 5 Informative message, check

---

## checkCIF publication errors

---

### Alert level A

PUBL004\_ALERT\_1\_A The contact author's name and address are missing,  
    \_publ\_contact\_author\_name and \_publ\_contact\_author\_address.  
PUBL005\_ALERT\_1\_A \_publ\_contact\_author\_email, \_publ\_contact\_author\_fax and  
    \_publ\_contact\_author\_phone are all missing.  
    At least one of these should be present.  
PUBL006\_ALERT\_1\_A \_publ\_requested\_journal is missing  
    e.g. 'Acta Crystallographica Section C'  
PUBL008\_ALERT\_1\_A \_publ\_section\_title is missing. Title of paper.  
PUBL009\_ALERT\_1\_A \_publ\_author\_name is missing. List of author(s) name(s).  
PUBL010\_ALERT\_1\_A \_publ\_author\_address is missing. Author(s) address(es).  
PUBL012\_ALERT\_1\_A \_publ\_section\_abstract is missing.  
    Abstract of paper in English.

---

### Alert level G

PUBL017\_ALERT\_1\_G The \_publ\_section\_references section is missing or  
    empty.

---

7 **ALERT level A** = Data missing that is essential or data in wrong format  
1 **ALERT level G** = General alerts. Data that may be required is missing

---

## Publication of your CIF

You should attempt to resolve as many as possible of the alerts in all categories. Often the minor alerts point to easily fixed oversights, errors and omissions in your CIF or refinement strategy, so attention to these fine details can be worthwhile. In order to resolve some of the more serious problems it may be necessary to carry out additional measurements or structure refinements. However, the nature of your study may justify the reported deviations from journal submission requirements and the more serious of these should be commented upon in the discussion or experimental section of a paper or in the "special\_details" fields of the CIF. *checkCIF* was carefully designed to identify outliers and unusual parameters, but every test has its limitations and alerts that are not important in a particular case may appear. Conversely, the absence of alerts does not guarantee there are no aspects of the results needing attention. It is up to the individual to critically assess their own results and, if necessary, seek expert advice.

If level A alerts remain, which you believe to be justified deviations, and you intend to submit this CIF for publication in a journal, you should additionally insert an explanation in your CIF using the Validation Reply Form (VRF) below. This will allow your explanation to be considered as part of the review process.

```
# start Validation Reply Form
_vrf_PUBL004_GLOBAL
;
PROBLEM: The contact author's name and address are missing,
RESPONSE: ...
;
_vrf_PUBL005_GLOBAL
;
PROBLEM: _publ_contact_author_email, _publ_contact_author_fax and
RESPONSE: ...
;
_vrf_PUBL006_GLOBAL
;
PROBLEM: _publ_requested_journal is missing
RESPONSE: ...
;
_vrf_PUBL008_GLOBAL
;
PROBLEM: _publ_section_title is missing. Title of paper.
RESPONSE: ...
;
_vrf_PUBL009_GLOBAL
;
PROBLEM: _publ_author_name is missing. List of author(s) name(s).
RESPONSE: ...
;
_vrf_PUBL010_GLOBAL
;
PROBLEM: _publ_author_address is missing. Author(s) address(es).
RESPONSE: ...
;
_vrf_PUBL012_GLOBAL
;
PROBLEM: _publ_section_abstract is missing.
RESPONSE: ...
;
_vrf_PLAT417_I
;
```

```

PROBLEM: Short Inter D-H..H-D      H14W   ..  H15W   ..      1.40 Ang.
RESPONSE: ...
;
_vrf_PLAT924_I
;
PROBLEM: The Reported and Calculated Rho(min) Differ by .      8.45 eA-3
RESPONSE: ...
;
_vrf_PLAT927_I
;
PROBLEM: Reported and Calculated  wR2 Differ by .....      -0.0579 Check
RESPONSE: ...
;
_vrf_PLAT974_I
;
PROBLEM: Check Calcd Negative Residual Density on      Ba2      -8.86 eA-3
RESPONSE: ...
;
# end Validation Reply Form

```

If you wish to submit your CIF for publication in Acta Crystallographica Section C or E, you should upload your CIF via the web. If your CIF is to form part of a submission to another IUCr journal, you will be asked, either during electronic submission or by the Co-editor handling your paper, to upload your CIF via our web site.

---

**PLATON version of 05/02/2014; check.def file version of 05/02/2014**

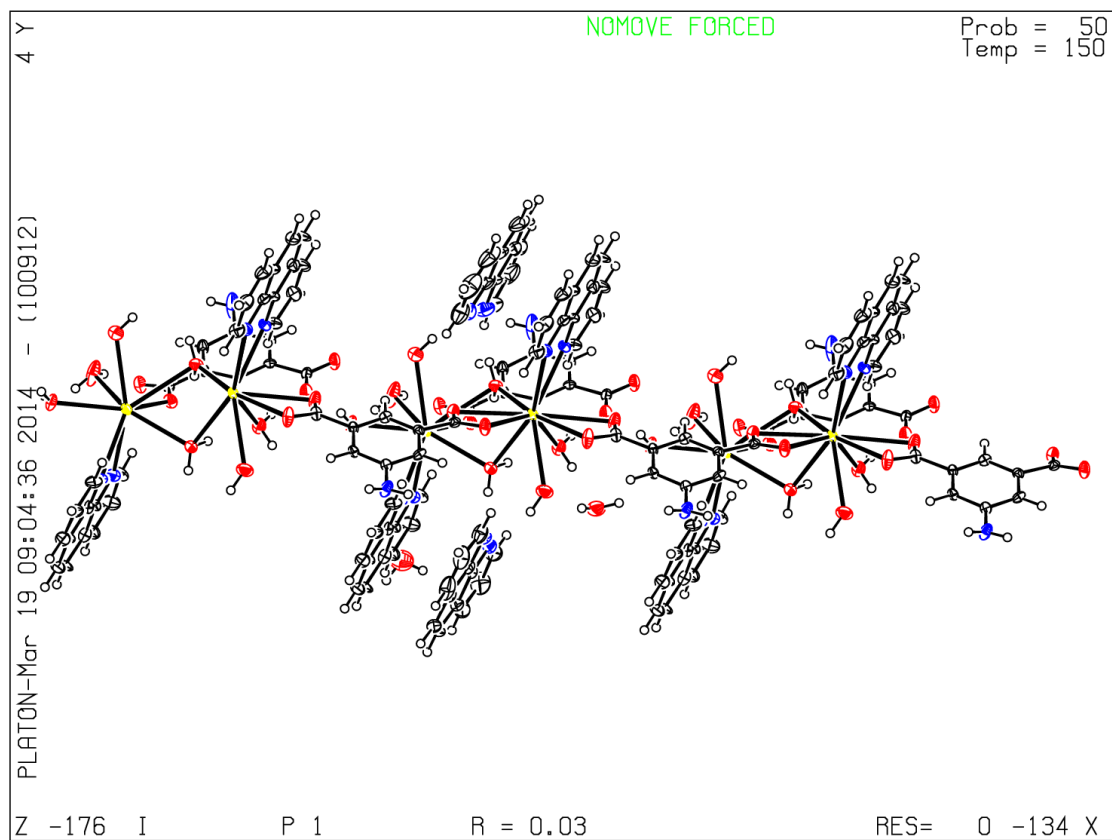

Supplement: s1 [file s1]
