# Supplementary material for: From Discrete Complexes to Metal–Organic Layered Materials: Remarkable Hydrogen Bonding Frameworks
Source: MDPI journal article supplement (doi:10.3390/molecules25061353), 2020-03-16

# checkCIF/PLATON report

Structure factors have been supplied for datablock(s) I

THIS REPORT IS FOR GUIDANCE ONLY. IF USED AS PART OF A REVIEW PROCEDURE FOR PUBLICATION, IT SHOULD NOT REPLACE THE EXPERTISE OF AN EXPERIENCED CRYSTALLOGRAPHIC REFEREE.

No syntax errors found.      CIF dictionary      Interpreting this report

## Datablock: I

---

|                 |                                                                 |                                                                 |
|-----------------|-----------------------------------------------------------------|-----------------------------------------------------------------|
| Bond precision: | C-C = 0.0080 A                                                  | Wavelength=0.71073                                              |
| Cell:           | a=17.6784(10)                                                   | b=29.6003(18)      c=11.7133(7)                                 |
|                 | alpha=90                                                        | beta=98.049(4)      gamma=90                                    |
| Temperature:    | 150 K                                                           |                                                                 |
|                 | Calculated                                                      | Reported                                                        |
| Volume          | 6069.0(6)                                                       | 6069.0(6)                                                       |
| Space group     | P 21/c                                                          | P 21/c                                                          |
| Hall group      | -P 2ybc                                                         | -P 2ybc1                                                        |
| Moiety formula  | C8 H26 Mg2 N O14, C8 H5 N O4, 3(C8 H6 N O4), H12 Mg O6, 10(H2 O | C8 H26 Mg2 N O14, C8 H5 N O4 3(C8 H6 N O4), H12 Mg O6, 10(H2 O) |
| Sum formula     | C40 H81 Mg3 N5 O46                                              | C40 H81 Mg3 N5 O46                                              |
| Mr              | 1441.03                                                         | 1441.03                                                         |
| Dx, g cm-3      | 1.577                                                           | 1.577                                                           |
| Z               | 4                                                               | 4                                                               |
| Mu (mm-1)       | 0.171                                                           | 0.171                                                           |
| F000            | 3040.0                                                          | 3040.0                                                          |
| F000'           | 3042.66                                                         |                                                                 |
| h,k,lmax        | 21,36,14                                                        | 21,36,14                                                        |
| Nref            | 11532                                                           | 11485                                                           |
| Tmin,Tmax       | 0.976,0.986                                                     | 0.975,0.986                                                     |
| Tmin'           | 0.975                                                           |                                                                 |

Correction method= MULTI-SCAN

Data completeness= 0.996      Theta(max)= 25.680

R(reflections)= 0.0793( 6035)      wR2(reflections)= 0.2399( 11485)

S = 1.022      Npar= Npar =1045

---

The following ALERTS were generated. Each ALERT has the format

**test-name\_ALERT\_alert-type\_alert-level.**

Click on the hyperlinks for more details of the test.

---

### Alert level A

|                   |                      |      |    |      |    |      |      |
|-------------------|----------------------|------|----|------|----|------|------|
| PLAT417_ALERT_2_A | Short Inter D-H..H-D | H5W  | .. | H47W | .. | 1.58 | Ang. |
| PLAT417_ALERT_2_A | Short Inter D-H..H-D | H11W | .. | H47W | .. | 1.48 | Ang. |
| PLAT417_ALERT_2_A | Short Inter D-H..H-D | H12W | .. | H42W | .. | 1.55 | Ang. |
| PLAT417_ALERT_2_A | Short Inter D-H..H-D | H26W | .. | H49W | .. | 1.41 | Ang. |

---

### Alert level B

DIFMX01\_ALERT\_2\_B The maximum difference density is > 0.1\*ZMAX\*1.00  
    \_refine\_diff\_density\_max given = 1.307  
    Test value = 1.200

|                   |                                                  |        |        |
|-------------------|--------------------------------------------------|--------|--------|
| PLAT097_ALERT_2_B | Large Reported Max. (Positive) Residual Density  | 1.31   | eA-3   |
| PLAT213_ALERT_2_B | Atom N3 has ADP max/min Ratio .....              | 5.0    | oblate |
| PLAT417_ALERT_2_B | Short Inter D-H..H-D H16W .. H50W ..             | 2.03   | Ang.   |
| PLAT420_ALERT_2_B | D-H Without Acceptor O15W - H29W ...             | Please | Check  |
| PLAT910_ALERT_3_B | Missing # of FCF Reflections Below Th(Min) ..... | 36     | Why ?  |

---

### Alert level C

DIFMX02\_ALERT\_1\_C The maximum difference density is > 0.1\*ZMAX\*0.75  
    The relevant atom site should be identified.

RINTA01\_ALERT\_3\_C The value of Rint is greater than 0.12  
    Rint given 0.147

|                   |                                                  |        |        |
|-------------------|--------------------------------------------------|--------|--------|
| PLAT020_ALERT_3_C | The value of Rint is greater than 0.12 .....     | 0.147  |        |
| PLAT094_ALERT_2_C | Ratio of Maximum / Minimum Residual Density .... | 2.65   | Why ?  |
| PLAT213_ALERT_2_C | Atom C20 has ADP max/min Ratio .....             | 3.3    | oblate |
| PLAT213_ALERT_2_C | Atom O15 has ADP max/min Ratio .....             | 3.5    | prolat |
| PLAT213_ALERT_2_C | Atom C25 has ADP max/min Ratio .....             | 3.6    | prolat |
| PLAT250_ALERT_2_C | Large U3/U1 Ratio for Average U(i,j) Tensor .... | 2.3    | Note   |
| PLAT250_ALERT_2_C | Large U3/U1 Ratio for Average U(i,j) Tensor .... | 2.6    | Note   |
| PLAT250_ALERT_2_C | Large U3/U1 Ratio for Average U(i,j) Tensor .... | 2.2    | Note   |
| PLAT314_ALERT_2_C | Check Small Angle for H2O: Metal-O10W -H19W      | 55.33  | Degree |
| PLAT314_ALERT_2_C | Check Small Angle for H2O: Metal-O16W -H32W      | 73.10  | Degree |
| PLAT340_ALERT_3_C | Low Bond Precision on C-C Bonds .....            | 0.0080 | Ang.   |
| PLAT417_ALERT_2_C | Short Inter D-H..H-D H1W .. H39W ..              | 2.13   | Ang.   |
| PLAT417_ALERT_2_C | Short Inter D-H..H-D H16W .. H52W ..             | 2.13   | Ang.   |
| PLAT906_ALERT_3_C | Large K value in the Analysis of Variance .....  | 8.264  | Check  |
| PLAT911_ALERT_3_C | Missing # FCF Refl Between THmin & STh/L= 0.600  | 13     | Why ?  |
| PLAT975_ALERT_2_C | Check Calcd Residual Density 1.10A From O26W     | 0.61   | eA-3   |
| PLAT975_ALERT_2_C | Check Calcd Residual Density 0.85A From N2       | 0.55   | eA-3   |
| PLAT975_ALERT_2_C | Check Calcd Residual Density 1.07A From O8W      | 0.54   | eA-3   |
| PLAT976_ALERT_2_C | Check Calcd Residual Density 0.93A From O10W     | -0.41  | eA-3   |

---

### Alert level G

FORMU01\_ALERT\_1\_G There is a discrepancy between the atom counts in the  
    \_chemical\_formula\_sum and \_chemical\_formula\_moiety. This is  
    usually due to the moiety formula being in the wrong format.  
    Atom count from \_chemical\_formula\_sum: C40 H81 Mg3 N5 O46  
    Atom count from \_chemical\_formula\_moiety: C24 H69 Mg3 N3 O77

|                   |                                                  |        |       |
|-------------------|--------------------------------------------------|--------|-------|
| PLAT002_ALERT_2_G | Number of Distance or Angle Restraints on AtSite | 97     | Note  |
| PLAT003_ALERT_2_G | Number of Uiso or Uij Restrained non-H Atoms ... | 3      | Why ? |
| PLAT005_ALERT_5_G | No _iucr_refine_instructions_details in the CIF  | Please | Do !  |
| PLAT042_ALERT_1_G | Calc. and Reported MoietyFormula Strings Differ  | Please | Check |
| PLAT066_ALERT_1_G | Predicted and Reported Tmin&Tmax Range Identical | ?      | Check |
| PLAT072_ALERT_2_G | SHELXL First Parameter in WGHT Unusually Large.  | 0.11   | Why ? |

|                   |                                                         |       |       |
|-------------------|---------------------------------------------------------|-------|-------|
| PLAT083_ALERT_2_G | SHELXL Second Parameter in WGHT Unusually Large.        | 11.07 | Why ? |
| PLAT303_ALERT_2_G | Full Occupancy H-Atom H19W with # Connections           | 2.00  | Check |
| PLAT303_ALERT_2_G | Full Occupancy H-Atom H32W with # Connections           | 2.00  | Check |
| PLAT790_ALERT_4_G | Centre of Gravity not Within Unit Cell: Resd. #<br>H2 O | 7     | Note  |
| PLAT790_ALERT_4_G | Centre of Gravity not Within Unit Cell: Resd. #<br>H2 O | 8     | Note  |
| PLAT790_ALERT_4_G | Centre of Gravity not Within Unit Cell: Resd. #<br>H2 O | 9     | Note  |
| PLAT860_ALERT_3_G | Number of Least-Squares Restraints .....                | 110   | Note  |

---

4 **ALERT level A** = Most likely a serious problem - resolve or explain  
6 **ALERT level B** = A potentially serious problem, consider carefully  
21 **ALERT level C** = Check. Ensure it is not caused by an omission or oversight  
14 **ALERT level G** = General information/check it is not something unexpected

4 ALERT type 1 CIF construction/syntax error, inconsistent or missing data  
30 ALERT type 2 Indicator that the structure model may be wrong or deficient  
7 ALERT type 3 Indicator that the structure quality may be low  
3 ALERT type 4 Improvement, methodology, query or suggestion  
1 ALERT type 5 Informative message, check

---

## checkCIF publication errors

---

### Alert level A

PUBL004\_ALERT\_1\_A The contact author's name and address are missing,  
    \_publ\_contact\_author\_name and \_publ\_contact\_author\_address.  
PUBL005\_ALERT\_1\_A \_publ\_contact\_author\_email, \_publ\_contact\_author\_fax and  
    \_publ\_contact\_author\_phone are all missing.  
    At least one of these should be present.  
PUBL006\_ALERT\_1\_A \_publ\_requested\_journal is missing  
    e.g. 'Acta Crystallographica Section C'  
PUBL008\_ALERT\_1\_A \_publ\_section\_title is missing. Title of paper.  
PUBL009\_ALERT\_1\_A \_publ\_author\_name is missing. List of author(s) name(s).  
PUBL010\_ALERT\_1\_A \_publ\_author\_address is missing. Author(s) address(es).  
PUBL012\_ALERT\_1\_A \_publ\_section\_abstract is missing.  
    Abstract of paper in English.

---

### Alert level G

PUBL017\_ALERT\_1\_G The \_publ\_section\_references section is missing or  
    empty.

---

7 **ALERT level A** = Data missing that is essential or data in wrong format  
1 **ALERT level G** = General alerts. Data that may be required is missing

---

## Publication of your CIF

You should attempt to resolve as many as possible of the alerts in all categories. Often the minor alerts point to easily fixed oversights, errors and omissions in your CIF or refinement strategy, so attention to these fine details can be worthwhile. In order to resolve some of the more serious problems it may be necessary to carry out additional measurements or structure refinements. However, the nature of your study may justify the reported deviations from journal submission requirements and the more serious of these should be commented upon in the discussion or experimental section of a paper or in the "special\_details" fields of the CIF. *checkCIF* was carefully designed to identify outliers and unusual parameters, but every test has its limitations and alerts that are not important in a particular case may appear. Conversely, the absence of alerts does not guarantee there are no aspects of the results needing attention. It is up to the individual to critically assess their own results and, if necessary, seek expert advice.

If level A alerts remain, which you believe to be justified deviations, and you intend to submit this CIF for publication in a journal, you should additionally insert an explanation in your CIF using the Validation Reply Form (VRF) below. This will allow your explanation to be considered as part of the review process.

```
# start Validation Reply Form
_vrf_PUBL004_GLOBAL
;
PROBLEM: The contact author's name and address are missing,
RESPONSE: ...
;
_vrf_PUBL005_GLOBAL
;
PROBLEM: _publ_contact_author_email, _publ_contact_author_fax and
RESPONSE: ...
;
_vrf_PUBL006_GLOBAL
;
PROBLEM: _publ_requested_journal is missing
RESPONSE: ...
;
_vrf_PUBL008_GLOBAL
;
PROBLEM: _publ_section_title is missing. Title of paper.
RESPONSE: ...
;
_vrf_PUBL009_GLOBAL
;
PROBLEM: _publ_author_name is missing. List of author(s) name(s).
RESPONSE: ...
;
_vrf_PUBL010_GLOBAL
;
PROBLEM: _publ_author_address is missing. Author(s) address(es).
RESPONSE: ...
;
_vrf_PUBL012_GLOBAL
;
PROBLEM: _publ_section_abstract is missing.
RESPONSE: ...
;
_vrf_PLAT417_I
;
```

PROBLEM: Short Inter D-H...H-D      H5W    ..   H47W    ..      1.58 Ang.  
RESPONSE: ...  
;  
# end Validation Reply Form

If you wish to submit your CIF for publication in Acta Crystallographica Section C or E, you should upload your CIF via the web. If your CIF is to form part of a submission to another IUCr journal, you will be asked, either during electronic submission or by the Co-editor handling your paper, to upload your CIF via our web site.

---

**PLATON version of 05/02/2014; check.def file version of 05/02/2014**

Datablock I - ellipsoid plot

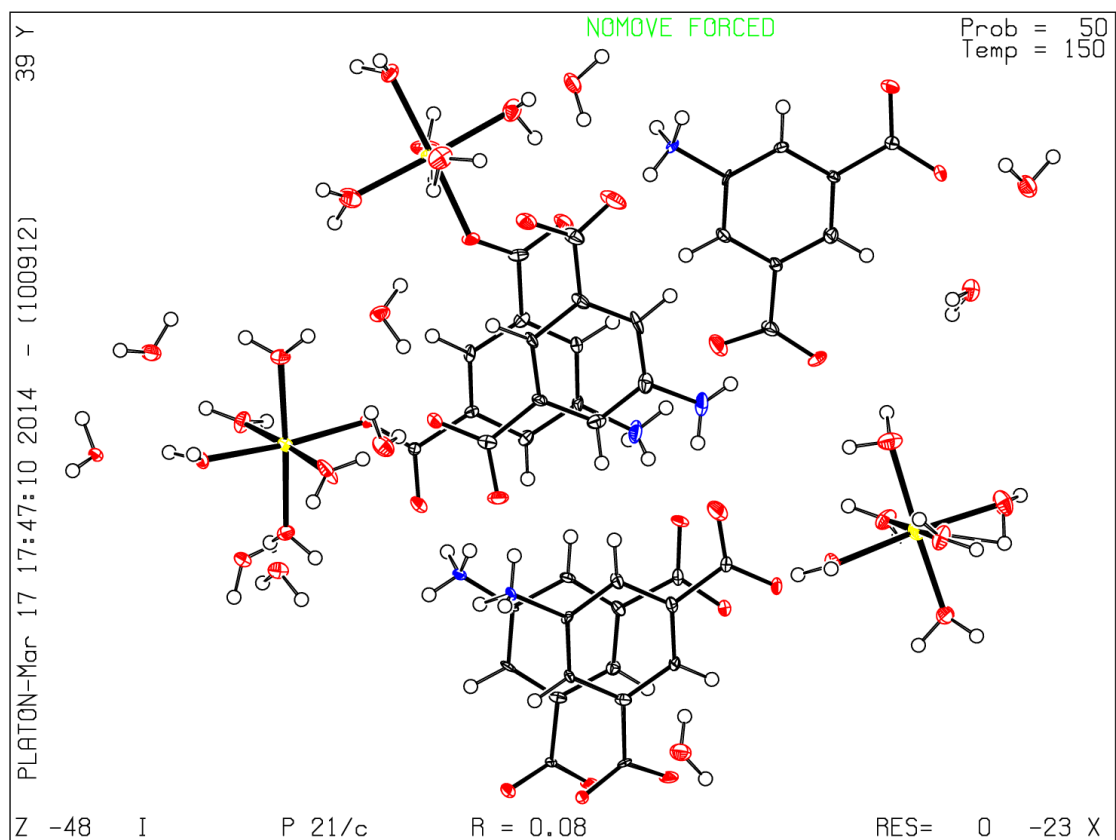

Supplement: s1 [file s1]
