# Supplementary material for: From Discrete Complexes to Metal–Organic Layered Materials: Remarkable Hydrogen Bonding Frameworks
Source: MDPI journal article supplement (doi:10.3390/molecules25061353), 2020-03-16
Supplement: s1 [file s1]

# Electronic Supporting Information

## **From discrete complexes to metal-organic layered materials: remarkable hydrogen bonding frameworks**

**Carla Queirós, Ana M. G. Silva,  
Baltazar de Castro and Luís Cunha Silva \***

LAQV / REQUIMTE & Department of Chemistry and Biochemistry,  
Faculty of Sciences, University of Porto, 4169-007 Porto, Portugal

\* Correspondence: l.cunha.silva@fc.up.pt; Tel.: +351 220402576

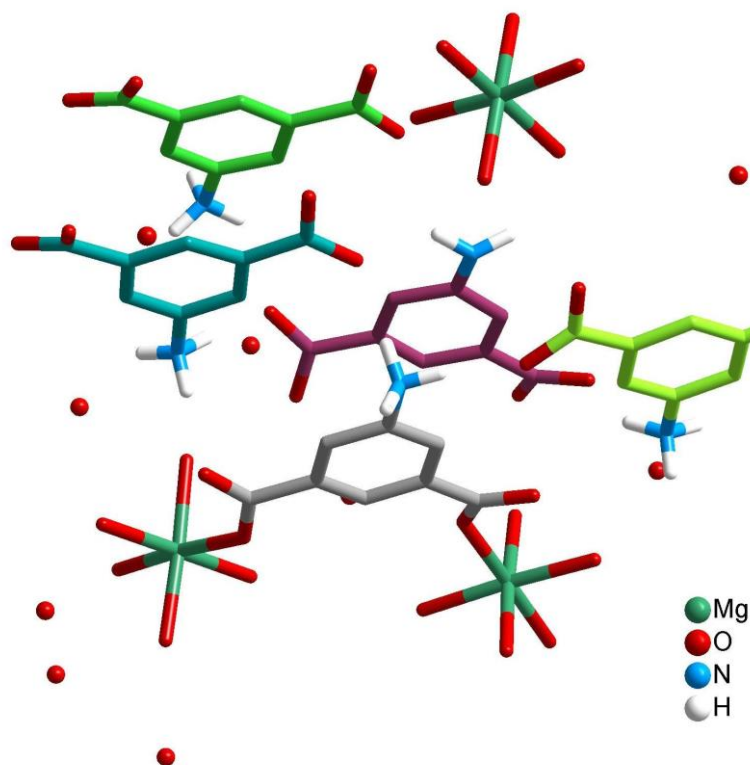

**Figure S1.** The asymmetric unit of the crystal structure of compound **1**,  $[\text{Mg}(\text{H}_2\text{O})_6] \cdot [\text{Mg}_2(\text{Haip})(\text{H}_2\text{O})_{10}] \cdot 3(\text{Haip}) \cdot (\text{aip}) \cdot 10(\text{H}_2\text{O})$ , with the carbon atoms of the crystallographic independent  $\text{Haip}^-$  and  $\text{aip}^{2-}$  ligands drawn with different colours. For clarity reasons the  $\text{H}$ -atoms of the water molecules and those connected to  $\text{C}$ -atoms of the ligands were omitted.

**Table S1.** Selected distances and angles of the Mg<sup>2+</sup> coordination centres of the compound **1**, [Mg(H<sub>2</sub>O)<sub>6</sub>]·[Mg<sub>2</sub>(Haip)(H<sub>2</sub>O)<sub>10</sub>]·3(Haip)·(aip)·10(H<sub>2</sub>O).

| Distance /Å |          | Angles /°   |           | Angles /°    |           | Angles /°     |           |
|-------------|----------|-------------|-----------|--------------|-----------|---------------|-----------|
| Mg1–O1      | 2.036(4) | O1–Mg1–O4W  | 90.86(19) | O10W–Mg2–O6W | 92.9(2)   | O14W–Mg3–OW13 | 174.9(2)  |
| Mg1–O4W     | 2.044(5) | O1–Mg1–O2W  | 97.25(19) | O10W–Mg2–O9W | 89.7(2)   | O14W–Mg3–OW12 | 88.6(2)   |
| Mg1–O2W     | 2.050(5) | O1–Mg1–O1W  | 90.61(19) | O10W–Mg2–O3  | 90.79(19) | O14W–Mg3–OW16 | 95.2(2)   |
| Mg1–O1W     | 2.057(5) | O1–Mg1–O3W  | 174.6(2)  | O10W–Mg2–O7W | 176.5(2)  | O14W–Mg3–OW11 | 89.5(2)   |
| Mg1–O3W     | 2.073(4) | O1–Mg1–O5W  | 86.75(19) | O10W–Mg2–O8W | 87.86(19) | O14W–Mg3–OW15 | 87.27(19) |
| Mg1–O5W     | 2.086(5) | O4W–Mg1–O2W | 89.64(19) | O6W–Mg2–O9W  | 176.9(2)  | OW13–Mg3–OW12 | 95.5(2)   |
|             |          | O4W–Mg1–O1W | 177.2(2)  | O6W–Mg2–O3   | 87.69(19) | OW13–Mg3–OW16 | 88.2(2)   |
| Mg2–O10W    | 2.045(5) | O4W–Mg1–O3W | 87.46(19) | O6W–Mg2–O7W  | 90.3(2)   | OW13–Mg3–OW11 | 87.4(2)   |
| Mg2–O6W     | 2.054(5) | O4W–Mg1–O5W | 91.7(2)   | O6W–Mg2–O8W  | 90.4(2)   | OW13–Mg3–OW15 | 88.9(2)   |
| Mg2–O9W     | 2.056(5) | O2W–Mg1–O1W | 87.8(2)   | O9W–Mg2–O3   | 94.05(19) | OW12–Mg3–OW16 | 86.0(2)   |
| Mg2–O3      | 2.059(4) | O2W–Mg1–O3W | 87.83(19) | O9W–Mg2–O7W  | 87.1(2)   | OW12–Mg3–OW11 | 90.6(2)   |
| Mg2–O7W     | 2.063(5) | O2W–Mg1–O5W | 175.8(2)  | O9W–Mg2–O8W  | 87.90(19) | OW12–Mg3–OW15 | 174.6(2)  |
| Mg2–O8W     | 2.070(5) | O1W–Mg1–O3W | 91.3(2)   | O3–Mg2–O7W   | 90.8(2)   | OW16–Mg3–OW11 | 174.1(2)  |
|             |          | O1W–Mg1–O5W | 90.7(2)   | O3–Mg2–O8W   | 177.6(2)  | OW16–Mg3–OW15 | 91.0(2)   |
| Mg3–O14W    | 2.029(5) | O3W–Mg1–O5W | 88.22(19) | O7W–Mg2–O8W  | 90.6(2)   | OW11–Mg3–OW15 | 92.7(2)   |
| Mg3–O13W    | 2.043(5) |             |           |              |           |               |           |
| Mg3–O12W    | 2.057(5) |             |           |              |           |               |           |
| Mg3–O16W    | 2.061(5) |             |           |              |           |               |           |
| Mg3–O11W    | 2.094(5) |             |           |              |           |               |           |
| Mg3–O15W    | 2.111(5) |             |           |              |           |               |           |

**Table S2.** Geometric information (distances in Å and angles in degrees) for the D–H···A hydrogen bond interactions of the [Mg(H<sub>2</sub>O)<sub>6</sub>][Mg<sub>2</sub>(Haip)(H<sub>2</sub>O)<sub>10</sub>](Haip)·3(aip)·10(H<sub>2</sub>O) (**1**) crystal structure.<sup>a</sup>

| D–H···A                         | <i>d</i> (H···A) | <i>d</i> (D···A) | ∠ (DHA) | D–H···A                         | <i>d</i> (H···A) | <i>d</i> (D···A) | ∠ (DHA) |
|---------------------------------|------------------|------------------|---------|---------------------------------|------------------|------------------|---------|
| N1–H1A···O2 <sup>i</sup>        | 2.30(6)          | 2.923(7)         | 129(6)  | O10W–H20W···O7                  | 1.97(5)          | 2.701(6)         | 134(6)  |
| N1–H1A···O19 <sup>iii</sup>     | 2.45(6)          | 3.090(7)         | 131(6)  | O11W–H21W···O16                 | 1.92(3)          | 2.808(6)         | 171(6)  |
| N1–H2A···O9                     | 1.84(3)          | 2.696(8)         | 168(7)  | O11W–H22W···O18                 | 2.07(4)          | 2.861(6)         | 147(5)  |
| N1–H3A···O15                    | 1.89(3)          | 2.765(8)         | 172(7)  | O12W–H23W···O18W <sup>i</sup>   | 1.99(5)          | 2.793(6)         | 146(6)  |
| N2–H4A···O17                    | 2.47(6)          | 3.092(8)         | 128(6)  | O12W–H24W···O10 <sup>x</sup>    | 1.86(3)          | 2.750(6)         | 169(7)  |
| N2–H4A···O15                    | 2.57(6)          | 3.217(8)         | 131(6)  | O13W–H25W···O23W <sup>iii</sup> | 1.85(3)          | 2.727(6)         | 159(5)  |
| N2–H5A···O8 <sup>iii</sup>      | 2.20(4)          | 3.004(8)         | 155(7)  | O13W–H26W···O25W <sup>x</sup>   | 1.93(3)          | 2.816(6)         | 167(7)  |
| N3–H6A···O8                     | 2.05(5)          | 2.786(7)         | 141(6)  | O14W–H27W···O17W <sup>i</sup>   | 1.92(3)          | 2.813(6)         | 174(6)  |
| N3–H6A···O4                     | 2.64(6)          | 3.162(7)         | 119(5)  | O14W–H28W···O19W <sup>i</sup>   | 1.86(2)          | 2.738(6)         | 165(5)  |
| N3–H7A···O12 <sup>iv</sup>      | 1.93(3)          | 2.802(7)         | 174(6)  | O15W–H30W···O10                 | 2.16(4)          | 2.920(6)         | 139(5)  |
| N3–H8A···O17 <sup>iii</sup>     | 1.82(3)          | 2.695(7)         | 174(6)  | O16W–H31W···O18 <sup>xi</sup>   | 1.90(4)          | 2.734(6)         | 153(6)  |
| N4–H9A···O12 <sup>iii</sup>     | 2.24(5)          | 2.947(7)         | 140(6)  | O16W–H32W···O12W                | 2.10(6)          | 2.809(7)         | 135(7)  |
| N4–H9A···O6                     | 2.32(6)          | 2.836(7)         | 119(5)  | O17W–H33W···O16 <sup>vii</sup>  | 1.88(3)          | 2.763(6)         | 170(6)  |
| N4–H10A···O4 <sup>v</sup>       | 1.85(3)          | 2.719(7)         | 170(6)  | O17W–H34W···O20 <sup>vii</sup>  | 1.83(3)          | 2.706(6)         | 164(6)  |
| N4–H11A···O13 <sup>vi</sup>     | 1.87(3)          | 2.710(7)         | 164(6)  | O18W–H35W···O3W <sup>viii</sup> | 2.03(3)          | 2.889(6)         | 164(6)  |
| N5–H12A···O6                    | 1.79(3)          | 2.668(7)         | 172(6)  | O18W–H35W···O2W <sup>viii</sup> | 2.55(6)          | 3.037(6)         | 116(4)  |
| N5–H13A···O2                    | 1.87(3)          | 2.742(7)         | 179(7)  | O18W–H36W···O20 <sup>vii</sup>  | 1.82(3)          | 2.704(6)         | 172(6)  |
| N5–H14A···O13 <sup>vi</sup>     | 2.27(5)          | 2.846(7)         | 125(5)  | O19W–H37W···O15 <sup>i</sup>    | 1.94(2)          | 2.819(6)         | 178(6)  |
| N5–H14A···O19 <sup>vi</sup>     | 2.35(5)          | 2.991(7)         | 131(5)  | O19W–H38W···O10 <sup>i</sup>    | 1.92(3)          | 2.782(6)         | 169(6)  |
| O1W–H1W···O20W                  | 1.85(2)          | 2.731(6)         | 169(6)  | O19W–H38W···O9 <sup>i</sup>     | 2.47(5)          | 3.116(7)         | 131(5)  |
| O1W–H2W···O5                    | 1.89(2)          | 2.774(6)         | 171(6)  | O20W–H39W···O20 <sup>vi</sup>   | 2.12(4)          | 2.845(6)         | 139(5)  |
| O2W–H3W···O19 <sup>vi</sup>     | 2.01(4)          | 2.826(6)         | 153(6)  | O20W–H39W···O18W <sup>xii</sup> | 2.64(3)          | 3.430(6)         | 149(5)  |
| O2W–H4W···O19W                  | 1.80(2)          | 2.682(6)         | 175(7)  | O20W–H40W···O14 <sup>vi</sup>   | 1.86(2)          | 2.747(6)         | 168(6)  |
| O3W–H5W···O24W <sup>vii</sup>   | 1.85(3)          | 2.713(6)         | 165(6)  | O21W–H41W···O5                  | 1.82(2)          | 2.732(6)         | 175(6)  |
| O3W–H6W···O17W                  | 1.82(3)          | 2.692(6)         | 165(6)  | O21W–H42W···O6W <sup>xii</sup>  | 2.37(7)          | 2.834(7)         | 112(5)  |
| O4W–H7W···O18W                  | 1.84(3)          | 2.712(6)         | 157(6)  | O22W–H43W···O5                  | 1.83(2)          | 2.709(6)         | 165(5)  |
| O4W–H8W···O16 <sup>i</sup>      | 1.83(3)          | 2.718(6)         | 161(5)  | O22W–H44W···O3                  | 2.16(3)          | 3.031(6)         | 162(5)  |
| O5W–H9W···O22W                  | 1.92(3)          | 2.795(6)         | 162(5)  | O22W–H44W···O6W                 | 2.41(5)          | 2.973(7)         | 121(4)  |
| O5W–H10W···O20W <sup>viii</sup> | 1.95(2)          | 2.837(6)         | 179(7)  | O23W–H45W···O18 <sup>iii</sup>  | 1.92(2)          | 2.804(6)         | 165(5)  |
| O6W–H11W···O24W <sup>i</sup>    | 1.97(3)          | 2.813(6)         | 157(6)  | O23W–H45W···O17 <sup>iii</sup>  | 2.41(5)          | 3.080(6)         | 131(5)  |
| O6W–H12W···O21W <sup>viii</sup> | 1.95(3)          | 2.834(7)         | 172(7)  | O23W–H46W···O8                  | 1.91(4)          | 2.765(7)         | 155(6)  |
| O7W–H13W···O14 <sup>i</sup>     | 1.89(3)          | 2.774(6)         | 161(7)  | O24W–H47W···O6W <sup>i</sup>    | 2.37(7)          | 2.813(6)         | 112(5)  |
| O7W–H14W···O21W <sup>ii</sup>   | 1.83(3)          | 2.717(6)         | 162(7)  | O24W–H48W···O5W <sup>i</sup>    | 2.21(5)          | 2.891(6)         | 135(5)  |
| O8W–H15W···O22W <sup>viii</sup> | 1.80(3)          | 2.704(6)         | 173(5)  | O24W–H48W···O1 <sup>i</sup>     | 2.47(3)          | 3.250(6)         | 150(5)  |
| O8W–H16W···O25W <sup>ix</sup>   | 1.80(3)          | 2.687(6)         | 163(6)  | O25W–H49W···O13W <sup>xi</sup>  | 2.30(5)          | 2.816(6)         | 116(4)  |
| O9W–H17W···O4                   | 2.03(4)          | 2.863(6)         | 155(6)  | O25W–H50W···O7 <sup>iii</sup>   | 1.93(4)          | 2.759(6)         | 150(5)  |
| O9W–H18W···O23W                 | 1.78(3)          | 2.669(6)         | 172(6)  | O26W–H51W···O11                 | 1.91(4)          | 2.707(6)         | 142(5)  |
| O10W–H19W···O3                  | 2.18(5)          | 2.922(6)         | 141(6)  | O26W–H51W···O9W <sup>iv</sup>   | 2.45(6)          | 2.963(7)         | 115(4)  |
| O10W–H19W···O6W                 | 2.38(5)          | 2.971(7)         | 124(5)  | O26W–H52W···O8W <sup>iv</sup>   | 2.04(4)          | 2.898(6)         | 155(6)  |

<sup>a</sup> Symmetry transformations used to generate equivalent atoms: (i)  $-x, -y+1, -z+1$ ; (ii)  $x, y, z-1$ ; (iii)  $-x+1, -y+1, -z+1$ ; (iv)  $-x+1, -y+1, -z$ ; (v)  $x, y, z+1$ ; (vi)  $-x, -y+1, -z+2$ ; (vii)  $-x, y+1/2, -z+3/2$ ; (viii)  $x, -y+3/2, z-1/2$ ; (ix)  $-x+1, y+1/2, -z+1/2$ ; (x)  $x, -y+1/2, z+1/2$ ; (xi)  $x, -y+1/2, z-1/2$ ; (xii)  $x, -y+3/2, z+1/2$ .

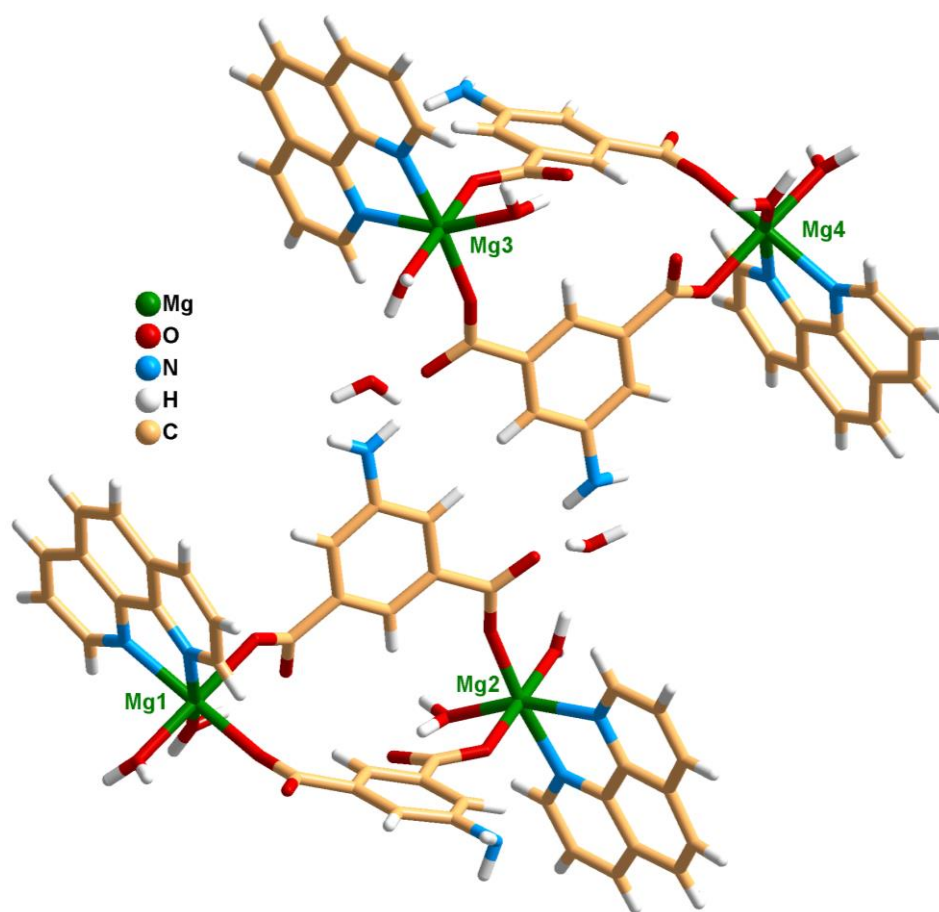

**Figure S2.** The asymmetric unit of the crystal structure of compound **2**,  $[\text{Mg}_2(\text{aip})_2(\text{phen})_2(\text{H}_2\text{O})_4]_2 \cdot 2(\text{H}_2\text{O})$ .

**Table S3.** Selected distances and angles of the Mg<sup>2+</sup> coordination centres of the compound **2**, [Mg<sub>2</sub>(aip)<sub>2</sub>(phen)<sub>2</sub>(H<sub>2</sub>O)<sub>4</sub>]<sub>2</sub>·2(H<sub>2</sub>O).

| Distance /Å |          | Angles /°   |           |             |           |             |           |
|-------------|----------|-------------|-----------|-------------|-----------|-------------|-----------|
| Mg1–O5      | 2.022(5) | O1–Mg1–N1   | 84.4(2)   | O5–Mg1–O1W  | 89.6(2)   | O1W–Mg1–O2W | 93.9(2)   |
| Mg1–O1W     | 2.041(5) | O1–Mg1–N2   | 91.2(2)   | O5–Mg1–O2W  | 94.4(2)   | O2W–Mg1–N1  | 164.6(2)  |
| Mg1–O2W     | 2.065(5) | O5–Mg1–N1   | 99.3(2)   | O1W–Mg1–N1  | 93.1(2)   | O2W–Mg1–N2  | 91.2(2)   |
| Mg1–O1      | 2.101(5) | O5–Mg1–N2   | 174.3(2)  | O1W–Mg1–N2  | 89.1(2)   | O2W–Mg1–O1  | 88.72(19) |
| Mg1–N2      | 2.193(6) | O5–Mg1–O1   | 89.84(19) | O1W–Mg1–O1  | 177.3(2)  | N2–Mg1–N1   | 75.3(2)   |
| Mg1–N1      | 2.230(6) |             |           |             |           |             |           |
| Mg2–O4      | 2.002(5) | O4–Mg2–N5   | 100.5(2)  | O7–Mg2–N5   | 80.8(2)   | O4W–Mg2–N5  | 97.5(2)   |
| Mg2–O4W     | 2.035(5) | O4–Mg2–N6   | 173.8(2)  | O7–Mg2–N6   | 93.2(2)   | O4W–Mg2–N6  | 88.2(2)   |
| Mg2–O3W     | 2.055(5) | O4–Mg2–O7   | 90.23(19) | O3W–Mg2–N5  | 160.7(2)  | O4W–Mg2–O7  | 177.4(2)  |
| Mg2–O7      | 2.085(5) | O4–Mg2–O3W  | 94.9(2)   | O3W–Mg2–N6  | 90.4(2)   | O4W–Mg2–O3W | 94.4(2)   |
| Mg2–N6      | 2.205(6) | O4–Mg2–O4W  | 88.2(2)   | O3W–Mg2–O7  | 87.73(19) | N6–Mg2–N5   | 74.9(2)   |
| Mg2–N5      | 2.228(6) |             |           |             |           |             |           |
| Mg3–O5W     | 2.041(6) | O9–Mg3–N7   | 101.3(2)  | O13–Mg3–N8  | 93.2(2)   | O5W–Mg3–O6W | 95.4(2)   |
| Mg3–O6W     | 2.075(6) | O9–Mg3–N8   | 175.2(3)  | O15–Mg4–O8W | 89.9(2)   | O6W–Mg3–N7  | 160.4(2)  |
| Mg3–O13     | 2.084(5) | O9–Mg3–O13  | 89.3(2)   | O5W–Mg3–N7  | 96.9(2)   | O6W–Mg3–N8  | 89.8(2)   |
| Mg3–N8      | 2.200(6) | O9–Mg3–O5W  | 88.0(2)   | O5W–Mg3–N8  | 89.2(2)   | O6W–Mg3–O13 | 88.4(2)   |
| Mg3–N7      | 2.225(6) | O13–Mg3–N7  | 80.1(2)   | O5W–Mg3–O13 | 175.5(3)  | N8–Mg3–N7   | 75.1(2)   |
| Mg(3)–O(9)  | 2.015(5) |             |           |             |           |             |           |
| Mg4–O15     | 2.026(6) | O11–Mg4–N11 | 90.6(2)   | O15–Mg4–O7W | 94.8(2)   | O8W–Mg4–N11 | 88.7(2)   |
| Mg4–O8W     | 2.031(6) | O11–Mg4–N12 | 84.7(2)   | O7W–Mg4–N11 | 92.0(3)   | O8W–Mg4–N12 | 93.9(2)   |
| Mg4–O7W     | 2.063(6) | O15–Mg4–N11 | 173.2(3)  | O7W–Mg4–N12 | 164.6(3)  | O8W–Mg4–O11 | 178.6(3)  |
| Mg4–O11     | 2.102(5) | O15–Mg4–N12 | 99.1(2)   | O7W–Mg4–O11 | 88.5(2)   | O8W–Mg4–O7W | 92.8(2)   |
| Mg4–N11     | 2.202(7) | O15–Mg4–O11 | 90.8(2)   | O8W–Mg4–N11 | 88.7(2)   | N11–Mg4–N12 | 74.3(3)   |
| Mg4–N12     | 2.233(7) |             |           |             |           |             |           |

**Table S4.** Geometric information (distances in Å and angles in degrees) for the D–H...A hydrogen bond interactions of the [Mg<sub>2</sub>(aip)<sub>2</sub>(phen)<sub>2</sub>(H<sub>2</sub>O)<sub>4</sub>]<sub>2</sub>·2(H<sub>2</sub>O) (**2**) crystal structure.<sup>a</sup>

| D–H...A                        | <i>d</i> <sub>(H...A)</sub> | <i>d</i> <sub>(D...A)</sub> | ∠ <sub>(DHA)</sub> |
|--------------------------------|-----------------------------|-----------------------------|--------------------|
| N3–H33A...N4 <sup>i</sup>      | 2.26                        | 3.057(9)                    | 150.8              |
| N3–H33B...O10                  | 2.33                        | 2.945(9)                    | 127.1              |
| O1W–H1W...O10W <sup>ii</sup>   | 1.80(2)                     | 2.687(7)                    | 172(9)             |
| O1W–H2W...O2 <sup>iii</sup>    | 1.82(4)                     | 2.667(6)                    | 158(7)             |
| O2W–H3W...O2                   | 1.76(3)                     | 2.596(6)                    | 156(7)             |
| N4–H4A...O16 <sup>iv</sup>     | 2.09(4)                     | 2.923(9)                    | 158(8)             |
| O2W–H4W...O4 <sup>iii</sup>    | 2.17(5)                     | 2.961(6)                    | 148(7)             |
| O3W–H5W...O8                   | 1.73(3)                     | 2.611(6)                    | 165(7)             |
| O3W–H6W...O5 <sup>v</sup>      | 2.01(3)                     | 2.904(6)                    | 169(7)             |
| O4W–H7W...O8 <sup>v</sup>      | 1.79(3)                     | 2.675(6)                    | 169(7)             |
| O4W–H8W...O10W                 | 1.83(2)                     | 2.723(7)                    | 176(7)             |
| N9–H5A...O6 <sup>vi</sup>      | 2.05(2)                     | 2.929(8)                    | 175(9)             |
| N10–H7A...O3                   | 2.14(4)                     | 2.961(8)                    | 155(7)             |
| N10–H8A...N9 <sup>vii</sup>    | 2.41(7)                     | 3.074(10)                   | 131(8)             |
| O5W–H9W...O9W                  | 1.81(3)                     | 2.700(7)                    | 172(10)            |
| O5W–H10W...O12 <sup>viii</sup> | 1.80(4)                     | 2.680(7)                    | 162(8)             |
| O6W–H11W...O14                 | 1.81(5)                     | 2.615(7)                    | 148(9)             |
| O7W–H13W...O15 <sup>ix</sup>   | 2.21(6)                     | 2.922(7)                    | 135(6)             |
| O7W–H14W...O12                 | 1.91(5)                     | 2.605(7)                    | 133(6)             |
| O8W–H15W...O14 <sup>ix</sup>   | 1.76(3)                     | 2.651(7)                    | 165(7)             |
| O8W–H16W...O9W <sup>x</sup>    | 1.81(2)                     | 2.713(8)                    | 173(9)             |
| O10W–H19W...O3                 | 1.88(2)                     | 2.756(7)                    | 168(7)             |
| O10W–H20W...O6 <sup>x</sup>    | 1.90(3)                     | 2.754(7)                    | 160(7)             |
| O9W–H17W...O10                 | 2.11(7)                     | 2.770(8)                    | 130(7)             |
| O9W–H18W...O16 <sup>ii</sup>   | 1.89(3)                     | 2.733(8)                    | 160(7)             |

<sup>a</sup> Symmetry transformations used to generate equivalent atoms: (i) *x*–1,*y*,*z*; (ii) *x*,*y*,*z*–1; (iii) *x*,*y*+1/2,*z*–1/2; (iv) *x*+1,*y*,*z*–1; (v) *x*,*y*+1/2,*z*+1/2; (vi) *x*–1,*y*,*z*+1; (vii) *x*+1,*y*,*z*; (viii) *x*+1,*y*,*z*+2; (ix) *x*+1,*y*,*z*+3; (x) *x*,*y*,*z*+1.

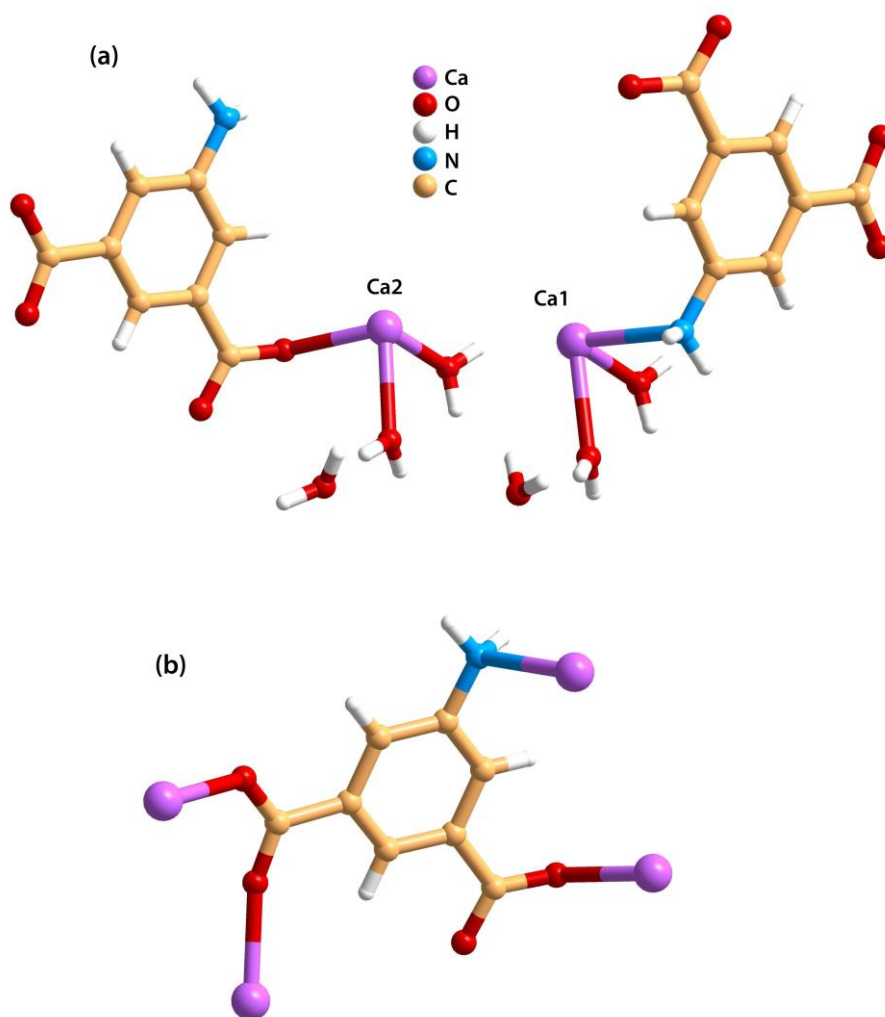

**Figure S3.** (a) The asymmetric unit of the crystal structure of compound 3,  $[\text{Ca}(\text{aip})(\text{H}_2\text{O})_2] \cdot (\text{H}_2\text{O})$ , represented in the ball-and-stick model. (b) Coordination modes of the ligand  $\text{aip}^{2-}$ .



**Table S5.** Selected distances and angles of the Ca<sup>2+</sup> coordination centres of the compound **3**, [Ca(aip)(H<sub>2</sub>O)<sub>2</sub>](H<sub>2</sub>O).<sup>a</sup>

| Distance /Å           |            | Angles /°                               |           | Angles /°                              |           |
|-----------------------|------------|-----------------------------------------|-----------|----------------------------------------|-----------|
| Ca1–O3 <sup>i</sup>   | 2.2784(12) | O3 <sup>i</sup> –Ca1–O4 <sup>ii</sup>   | 103.72(5) | O7 <sup>iv</sup> –Ca2–O8 <sup>v</sup>  | 101.43(5) |
| Ca1–O4 <sup>ii</sup>  | 2.3362(13) | O3 <sup>i</sup> –Ca1–O1 <sup>iii</sup>  | 97.90(4)  | O7 <sup>iv</sup> –Ca2–O6               | 93.46(4)  |
| Ca1–O1 <sup>iii</sup> | 2.3719(13) | O3 <sup>i</sup> –Ca1–O1W                | 172.27(5) | O7 <sup>iv</sup> –Ca2–O3W              | 175.79(5) |
| Ca1–O1W               | 2.3788(13) | O3 <sup>i</sup> –Ca1–O2W                | 97.47(5)  | O7 <sup>iv</sup> –Ca2–O4W              | 96.69(5)  |
| Ca1–O2W               | 2.3980(13) | O3 <sup>i</sup> –Ca1–N1                 | 93.52(5)  | O7 <sup>iv</sup> –Ca2–N2 <sup>vi</sup> | 95.33(5)  |
| Ca1–N1                | 2.5446(17) | O4 <sup>ii</sup> –Ca1–O1 <sup>iii</sup> | 87.25(5)  | O8 <sup>v</sup> –Ca2–O6                | 89.21(5)  |
|                       |            | O4 <sup>ii</sup> –Ca1–O1W               | 82.07(5)  | O8 <sup>v</sup> –Ca2–O3W               | 82.74(5)  |
| Ca2–O7 <sup>iv</sup>  | 2.2582(12) | O4 <sup>ii</sup> –Ca1–O2W               | 158.27(5) | O8 <sup>v</sup> –Ca2–O4W               | 160.92(5) |
| Ca2–O8 <sup>v</sup>   | 2.3055(13) | O4 <sup>ii</sup> –Ca1–N1                | 83.05(5)  | O8 <sup>v</sup> –Ca2–N2 <sup>vi</sup>  | 169.59(5) |
| Ca2–O6                | 2.3684(13) | O1 <sup>iii</sup> –Ca1–O1W              | 87.40(5)  | O6–Ca2–O3W                             | 87.07(5)  |
| Ca2–O3W               | 2.3837(13) | O1 <sup>iii</sup> –Ca1–O2W              | 94.62(5)  | O6–Ca2–O4W                             | 95.64(5)  |
| Ca2–O4W               | 2.3887(13) | O1 <sup>iii</sup> –Ca1–N1               | 166.49(5) | O6–Ca2–N2 <sup>vi</sup>                | 169.59(5) |
| Ca2–N2 <sup>vi</sup>  | 2.5672(17) | O1W–Ca1–O2W                             | 76.40(5)  | O3W–Ca2–O4W                            | 79.10(5)  |
|                       |            | O1W–Ca1–N1                              | 81.98(5)  | O3W–Ca2–N2 <sup>vi</sup>               | 84.57(5)  |
|                       |            | O2W–Ca1–N1                              | 90.99(5)  | O4W–Ca2–N2 <sup>vi</sup>               | 88.86(5)  |

<sup>a</sup> Symmetry transformations used to generate equivalent atoms: (i)  $-x+1, -y+2, -z+1$ ; (ii)  $x-1, y, z$ ; (iii)  $-x, -y+2, -z+1$ ; (iv)  $x+1, y, z$ ; (v)  $-x-1, -y+2, -z$ ; (vi)  $-x, -y+2, -z$

**Table S6.** Geometric information (distances in Å and angles in degrees) for the D–H···O hydrogen bond interactions of the [Ca(aip)(H<sub>2</sub>O)<sub>2</sub>](H<sub>2</sub>O) crystal structure (compound **3**).<sup>a</sup>

| D–H···O                        | <i>d</i> (H···O) | <i>d</i> (D···O) | ∠ (DHO)   |
|--------------------------------|------------------|------------------|-----------|
| O1W–H1W···O5W                  | 2.066(17)        | 2.847(2)         | 153(2)    |
| O1W–H2W···O1 <sup>vii</sup>    | 1.853(16)        | 2.7623(18)       | 171(2)    |
| N1–H1A···O6W <sup>viii</sup>   | 2.137(15)        | 3.014(2)         | 176.3(19) |
| N1–H2A···O6 <sup>ix</sup>      | 2.352(17)        | 3.169(2)         | 157.1(18) |
| O2W–H3W···O2 <sup>i</sup>      | 2.002(16)        | 2.8653(19)       | 166(2)    |
| O2W–H4W···O2 <sup>vii</sup>    | 1.904(16)        | 2.7742(18)       | 166(2)    |
| O3W–H5W···O6W                  | 1.910(16)        | 2.771(2)         | 172(2)    |
| O3W–H6W···O6 <sup>x</sup>      | 1.962(16)        | 2.8226(18)       | 171(2)    |
| N2–H3A···O1 <sup>11</sup>      | 2.375(16)        | 3.209(2)         | 159.6(18) |
| N2–H4A···O5W <sup>xii</sup>    | 2.274(15)        | 3.155(2)         | 170.1(18) |
| O4W–H7W···O5 <sup>iv</sup>     | 2.000(16)        | 2.8825(19)       | 172(2)    |
| O4W–H8W···O5 <sup>x</sup>      | 1.876(17)        | 2.7308(17)       | 161(2)    |
| O5W–H9W···O1W                  | 2.45(3)          | 2.847(2)         | 111(2)    |
| O5W–H9W···O4 <sup>ii</sup>     | 2.37(2)          | 3.097(2)         | 150(2)    |
| O5W–H10W···O5 <sup>ix</sup>    | 1.892(17)        | 2.768(2)         | 173(3)    |
| O6W–H11W···O2 <sup>iii</sup>   | 2.10(2)          | 2.836(2)         | 143(2)    |
| O6W–H12W···O5W <sup>xiii</sup> | 1.858(16)        | 2.774(3)         | 175.2(19) |

<sup>a</sup> Symmetry transformations used to generate equivalent atoms:

(i)  $-x+1, -y+2, -z+1$ ; (ii)  $x-1, y, z$ ; (iii)  $-x, -y+2, -z+1$ ; (iv)  $x+1, y, z$ ; (v)  $-x-1, -y+2, -z$ ; (vi)  $-x, -y+2, -z$ ; (vii)  $x, y-1, z$ ; (viii)  $-x, -y+1, -z+1$ ; (ix)  $x, y, z+1$ ; (x)  $-x, -y+1, -z$ ; (xi)  $x, y, z-1$ ; (xii)  $x, y+1, z-1$ ; (xiii)  $-x-1, -y+1, -z+1$ .

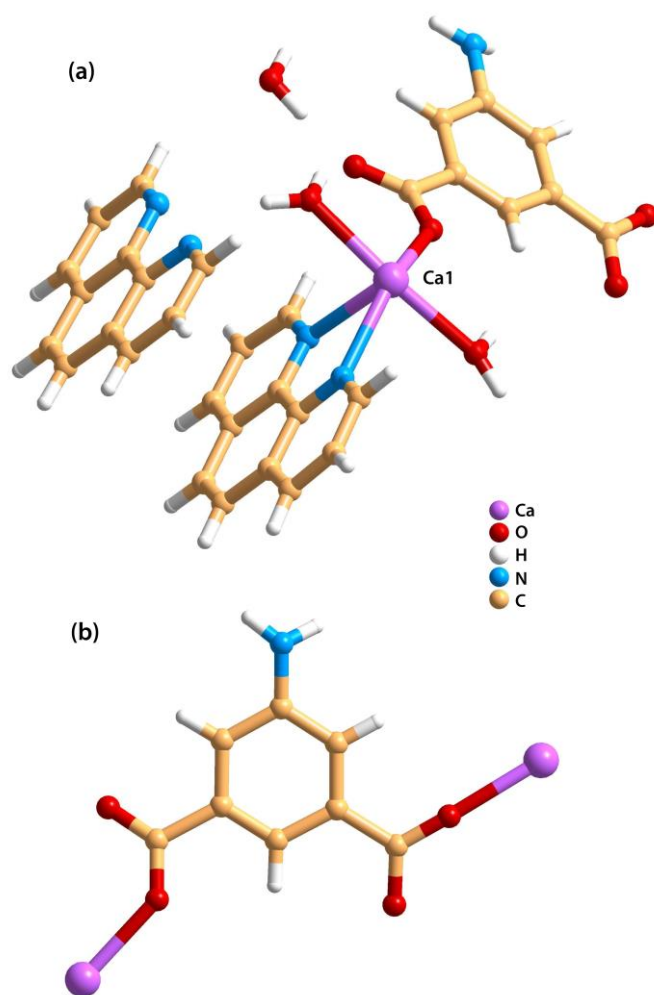

**Figure S4.** (a) The asymmetric unit of the crystal structure of the metal-organic chain **4**,  $[\text{Ca}(\text{aip})(\text{phen})(\text{H}_2\text{O})_2] \cdot (\text{phen}) \cdot (\text{H}_2\text{O})$ , represented in the ball-and-stick model. (b) Coordination modes of the ligand  $\text{aip}^{2-}$ .

**Table S7.** Selected distances and angles of the Ca<sup>2+</sup> coordination centre of the compound **4**, [Ca(aip)(phen)(H<sub>2</sub>O)<sub>2</sub>](phen)·(H<sub>2</sub>O).

| Distance /Å         |          | Angles /°                |            |
|---------------------|----------|--------------------------|------------|
| Ca1–O4 <sup>i</sup> | 2.249(4) | O4 <sup>i</sup> –Ca1–O1  | 115.29(14) |
| Ca1–O1              | 2.282(4) | O4 <sup>i</sup> –Ca1–O1W | 96.95(15)  |
| Ca1–O1W             | 2.366(4) | O4 <sup>i</sup> –Ca1–O2W | 97.87(14)  |
| Ca1–O2W             | 2.388(4) | O4 <sup>i</sup> –Ca1–N2  | 152.03(15) |
| Ca1–N2              | 2.501(5) | O4 <sup>i</sup> –Ca1–N1  | 91.02(15)  |
| Ca1–N1              | 2.534(5) | O1–Ca1–O1W               | 82.18(14)  |
|                     |          | O1–Ca1–O2W               | 80.19(14)  |
|                     |          | O1–Ca1–N2                | 91.14(14)  |
|                     |          | O1–Ca1–N1                | 150.86(15) |
|                     |          | O1W–Ca1–O2W              | 160.59(15) |
|                     |          | O1W–Ca1–N2               | 95.53(15)  |
|                     |          | O1W–Ca1–N1               | 82.38(15)  |
|                     |          | O2W–Ca1–N2               | 76.83(14)  |
|                     |          | O2W–Ca1–N1               | 109.77(15) |
|                     |          | N2–Ca1–N1                | 65.98(15)  |

Symmetry transformations used to generate equivalent atoms: (i)  $-x, y+1/2, -z+2$

**Table S8.** Geometric information (distances in Å and angles in degrees) for the D–H···O hydrogen bond interactions of the [Ca(aip)(phen)(H<sub>2</sub>O)<sub>2</sub>](phen)·(H<sub>2</sub>O) crystal structure (**4**).<sup>a</sup>

| D–H···O                      | <i>d</i> (H···A) | <i>d</i> (D···A) | ∠ (DHA) |
|------------------------------|------------------|------------------|---------|
| O1W–H1W···O3W <sup>iii</sup> | 2.04(4)          | 2.802(6)         | 141(4)  |
| O1W–H1W···O1                 | 2.60(5)          | 3.056(5)         | 112(4)  |
| O2W–H3W···O2                 | 1.81(3)          | 2.650(6)         | 156(5)  |
| O2W–H4W···N3                 | 1.94(3)          | 2.750(6)         | 153(4)  |
| N5–H1A···O2W <sup>iv</sup>   | 2.14(4)          | 2.887(6)         | 144(5)  |
| N5–H2A···O3 <sup>v</sup>     | 2.14(3)          | 2.950(6)         | 154(5)  |
| N5–H2A···O4 <sup>v</sup>     | 2.48(4)          | 3.262(6)         | 149(5)  |
| O3W–H5W···O2                 | 1.85(3)          | 2.714(5)         | 158(6)  |
| O3W–H6W···O3 <sup>v</sup>    | 1.99(3)          | 2.865(5)         | 165(6)  |

<sup>a</sup> Symmetry transformations used to generate equivalent atoms: (i)  $-x, y+1/2, -z+2$ ; (ii)  $-x, y-1/2, -z+2$ ; (iii)  $x-1, y, z$ ; (iv)  $-x+1, y-1/2, -z+2$  (v)  $x+1, y, z$

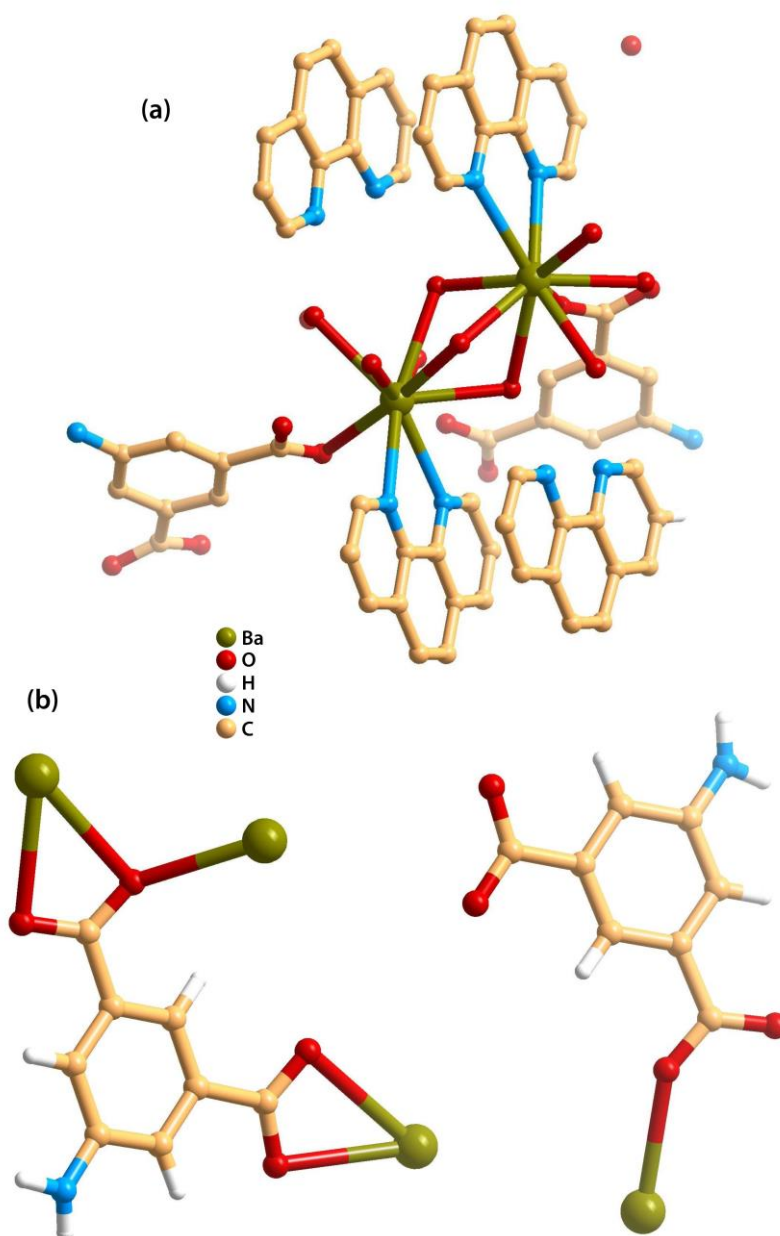

**Figure S5.** (a) The asymmetric unit of the crystal structure of compound 5, [Ba<sub>2</sub>(aip)<sub>2</sub>(phen)<sub>2</sub>(H<sub>2</sub>O)<sub>7</sub>] $\cdot$ 2(phen) $\cdot$ 2(H<sub>2</sub>O), represented in the ball-and-stick model. (b) Coordination modes of the two crystallographic independent aip<sup>2-</sup> ligands.

**Table S9.** Selected distances and angles of the Ba<sup>2+</sup> coordination centres of compound **5** [Ba<sub>2</sub>(aip)<sub>2</sub>(phen)<sub>2</sub>(H<sub>2</sub>O)<sub>7</sub>]<sub>2</sub>·2(phen)·2(H<sub>2</sub>O).

| Distance / Å            |          | Angles / °              |            |                         |            |                         |            |                         |            |
|-------------------------|----------|-------------------------|------------|-------------------------|------------|-------------------------|------------|-------------------------|------------|
| Ba(1)–O(7) <sup>i</sup> | 2.726(2) | O7–Ba1–O1W <sup>i</sup> | 136.06(10) | O2W–Ba1–O1              | 133.73(10) | O5W–Ba2–N6              | 105.56(11) | N5–Ba2–N6               | 55.89(13)  |
| Ba(1)–O(1W)             | 2.738(3) | O7–Ba1–O4W <sup>i</sup> | 70.90(7)   | O2W–Ba1–O3W             | 76.40(11)  | O5W–Ba2–O6W             | 67.24(7)   | N5–Ba2–O6W              | 87.94(10)  |
| Ba(1)–O(4W)             | 2.748(2) | O7–Ba1–O2W <sup>i</sup> | 100.22(9)  | O2W–Ba1–N4              | 72.45(12)  | O5W–Ba2–O6              | 119.19(8)  | N5–Ba2–O6               | 70.68(12)  |
| Ba(1)–O(2W)             | 2.780(3) | O7–Ba1–O1 <sup>i</sup>  | 119.69(10) | O2W–Ba1–N3              | 90.54(13)  | O5W–Ba2–O4W             | 63.35(7)   | N5–Ba2–O4W              | 127.33(10) |
| Ba(1)–O(1)              | 2.794(4) | O7–Ba1–O3W <sup>i</sup> | 74.78(10)  | O2W–Ba1–O5W             | 141.62(9)  | O8–Ba2–O5 <sup>i</sup>  | 83.16(10)  | O7W–Ba2–O7 <sup>i</sup> | 98.97(10)  |
| Ba(1)–O(3W)             | 2.807(4) | O7–Ba1–N4 <sup>i</sup>  | 90.13(10)  | O1–Ba1–O3W              | 91.56(11)  | O8–Ba2–N5 <sup>i</sup>  | 127.97(12) | O7W–Ba2–N6              | 128.65(12) |
| Ba(1)–N(4)              | 2.915(5) | O7–Ba1–N3 <sup>i</sup>  | 139.92(11) | O1–Ba1–N4               | 125.56(12) | O8–Ba2–O7W <sup>i</sup> | 77.94(12)  | O7W–Ba2–O6W             | 73.89(10)  |
| Ba(1)–N(3)              | 2.937(5) | O7–Ba1–O5W <sup>i</sup> | 66.83(7)   | O1–Ba1–N3               | 74.23(13)  | O8–Ba2–O7 <sup>i</sup>  | 46.11(9)   | O7W–Ba2–O6              | 76.70(11)  |
| Ba(1)–O(5W)             | 3.017(2) | O1W–Ba1–O4W             | 137.25(9)  | O1–Ba1–O5W              | 54.45(9)   | O8–Ba2–N6 <sup>i</sup>  | 75.70(13)  | O7W–Ba2–O4W             | 62.93(8)   |
|                         |          | O1W–Ba1–O2W             | 69.83(10)  | O3W–Ba1–N4              | 142.21(12) | O8–Ba2–O6W <sup>i</sup> | 142.74(10) | O7–Ba2–N6 <sup>i</sup>  | 93.37(11)  |
| Ba(2)–O(5W)             | 2.823(2) | O1W–Ba1–O1              | 65.33(10)  | O3W–Ba1–N3              | 145.15(13) | O8–Ba2–O6 <sup>i</sup>  | 127.78(10) | O7–Ba2–O6W <sup>i</sup> | 115.48(7)  |
| Ba(2)–O(8) <sup>i</sup> | 2.846(4) | O1W–Ba1–O3W             | 61.29(12)  | O3W–Ba1–O5W             | 65.43(9)   | O8–Ba2–O4W <sup>i</sup> | 90.83(9)   | O7–Ba2–O6 <sup>i</sup>  | 173.64(8)  |
| Ba(2)–O(5)              | 2.851(3) | O1W–Ba1–N4              | 123.86(12) | N4–Ba1–N3               | 56.41(14)  | O5–Ba2–N5               | 100.13(11) | O7–Ba2–O4W <sup>i</sup> | 65.06(7)   |
| Ba(2)–N(5)              | 2.855(4) | O1W–Ba1–N3              | 83.92(13)  | N4–Ba1–O5W              | 139.50(10) | O5–Ba2–O7W              | 58.44(9)   | N6–Ba2–O6W              | 141.48(11) |
| Ba(2)–O(7W)             | 2.887(4) | O1W–Ba1–O5W             | 94.12(9)   | N3–Ba1–O5W              | 123.22(11) | O5–Ba2–O7 <sup>i</sup>  | 129.02(8)  | N6–Ba2–O6               | 85.92(12)  |
| Ba(2)–O(7) <sup>i</sup> | 2.916(2) | O4W–Ba1–O2W             | 148.80(9)  |                         |            | O5–Ba2–N6               | 75.20(11)  | N6–Ba2–O4W              | 158.01(11) |
| Ba(2)–N(6)              | 2.956(5) | O4W–Ba1–O1              | 72.22(10)  | O5W–Ba2–O8 <sup>i</sup> | 112.79(9)  | O5–Ba2–O6W              | 101.82(8)  | O6W–Ba2–O6              | 68.09(8)   |
| Ba(2)–O(6W)             | 2.975(3) | O4W–Ba1–O3W             | 126.46(9)  | O5W–Ba2–O5              | 163.88(8)  | O5–Ba2–O6               | 44.72(9)   | O6W–Ba2–O4W             | 54.69(7)   |
| Ba(2)–O(6)              | 2.981(4) | O4W–Ba1–N4              | 77.62(10)  | O5W–Ba2–N5              | 68.64(9)   | O5–Ba2–O4W              | 121.03(8)  | O6–Ba2–O4W              | 116.00(9)  |
| Ba(2)–O(4W)             | 2.987(2) | O4W–Ba1–N3              | 79.97(11)  | O5W–Ba2–O7W             | 125.20(8)  | N5–Ba2–O7W              | 146.75(12) |                         |            |
|                         |          | O4W–Ba1–O5W             | 63.77(7)   | O5W–Ba2–O7 <sup>i</sup> | 67.09(7)   | N5–Ba2–O7 <sup>i</sup>  | 114.06(10) |                         |            |

Symmetry transformations used to generate equivalent atoms: (i)  $x+1, y, z$

**Table S10.** Geometric information (distances in Å and angles in degrees) for the D–H···A hydrogen bond interactions of the [Ba<sub>2</sub>(aip)<sub>2</sub>(phen)<sub>2</sub>(H<sub>2</sub>O)<sub>7</sub>]·2(phen)·2(H<sub>2</sub>O) crystal structure (compound **5**).<sup>a</sup>

| D–H···O                         | <i>d</i> (H···A) | <i>d</i> (D···A) | ∠ (DHA) |
|---------------------------------|------------------|------------------|---------|
| N1–H1A···O8 <sup>iii</sup>      | 2.14(5)          | 2.847(5)         | 140(5)  |
| N(1)–H(2A)···O(5) <sup>iv</sup> | 2.04(3)          | 2.858(5)         | 160(6)  |
| N(2)–H(3A)···O(2) <sup>v</sup>  | 2.18(3)          | 2.996(6)         | 155(4)  |
| N(2)–H(4A)···O(4) <sup>vi</sup> | 2.29(3)          | 3.104(6)         | 158(4)  |
| O1W–H2W···O2W                   | 2.61(5)          | 3.158(5)         | 122(4)  |
| O1W–H1W···O2                    | 1.88(3)          | 2.712(4)         | 157(5)  |
| O2W–H3W···O3 <sup>i</sup>       | 2.00(3)          | 2.763(5)         | 150(4)  |
| O2W–H3W···O1W                   | 2.66(5)          | 3.158(5)         | 119(4)  |
| O2W–H4W···O6 <sup>i</sup>       | 1.918(19)        | 2.774(4)         | 167(4)  |
| O3W–H5W···N10                   | 2.00(2)          | 2.845(6)         | 163(5)  |
| O3W–H5W···N9                    | 2.68(4)          | 3.263(7)         | 126(4)  |
| O3W–H6W···O1W                   | 2.14(4)          | 2.827(5)         | 132(5)  |
| O4W–H7W···O6W                   | 1.96(3)          | 2.739(4)         | 145(4)  |
| O4W–H8W···N7                    | 1.97(2)          | 2.837(5)         | 169(3)  |
| O5W–H9W···N9                    | 2.10(2)          | 2.967(6)         | 160(3)  |
| O5W–H9W···N10                   | 2.70(3)          | 3.363(6)         | 131(3)  |
| O5W–H10W···O1                   | 1.84(2)          | 2.666(4)         | 156(4)  |
| O6W–H11W···O8W                  | 1.936(19)        | 2.809(5)         | 170(4)  |
| O6W–H12W···O3                   | 1.82(2)          | 2.720(5)         | 164(4)  |
| O7W–H13W···N8                   | 2.01(3)          | 2.856(7)         | 154(4)  |
| O7W–H14W···O8W                  | 2.15(5)          | 2.840(7)         | 131(5)  |
| O7W–H14W···O4W                  | 2.63(6)          | 3.067(4)         | 110(5)  |
| O8W–H15W···O7W                  | 1.96(3)          | 2.840(7)         | 160(5)  |
| O8W–H16W···O2W <sup>ii</sup>    | 2.65(5)          | 3.160(6)         | 117(4)  |
| O9W–H17W···O3W <sup>vii</sup>   | 1.83(3)          | 2.719(7)         | 158(7)  |
| O9W–H18W···O6 <sup>viii</sup>   | 2.16(3)          | 3.076(7)         | 168(6)  |

<sup>a</sup> Symmetry transformations used to generate equivalent atoms:

(i)  $x+1, y, z$ ; (ii)  $x-1, y, z$ ; (iii)  $x+1, y-1, z+1$ ; (iv)  $x, y-1, z+1$ ; (v)  $x-1, y+1, z-1$ ; (vi)  $x, y+1, z-1$ ; (vii)  $x, y-1, z$ ; (viii)  $x+1, y-1, z$ .

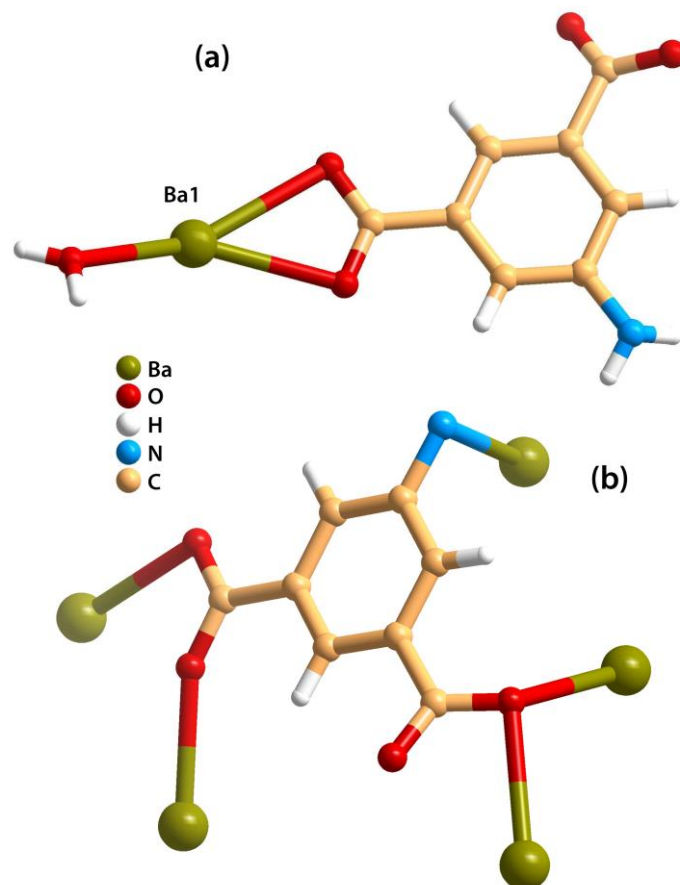

**Figure S6.** (a) The asymmetric unit of the crystal structure of compound **6**, [Ba(aip)(H<sub>2</sub>O)], represented in the ball-and-stick model. (b) Coordination modes of the ligand aip<sup>2-</sup> found in the crystal of **6**.



**Table S11.** Selected distances and angles of the Ba<sup>2+</sup> coordination centre of the compound **6**, [Ba(aip)(H<sub>2</sub>O)].

| Distance /Å           |            | Angles /°                                |           |
|-----------------------|------------|------------------------------------------|-----------|
| Ba1–O2 <sup>i</sup>   | 2.6802(14) | O2 <sup>i</sup> –Ba1–O1W                 | 89.62(5)  |
| Ba1–O1W               | 2.7276(15) | O2 <sup>i</sup> –Ba1–O1                  | 117.49(4) |
| Ba1–O1                | 2.7456(14) | O2 <sup>i</sup> –Ba1–O4 <sup>ii</sup>    | 105.02(5) |
| Ba1–O4 <sup>ii</sup>  | 2.7594(15) | O2 <sup>i</sup> –Ba1–O4 <sup>iii</sup>   | 167.88(4) |
| Ba1–O4 <sup>iii</sup> | 2.8321(14) | O2 <sup>i</sup> –Ba1–O3 <sup>iii</sup>   | 126.74(4) |
| Ba1–O3 <sup>iii</sup> | 2.8815(14) | O2 <sup>i</sup> –Ba1–N1 <sup>iv</sup>    | 98.12(5)  |
| Ba1–N1 <sup>iv</sup>  | 2.9255(19) | O1W–Ba1–O1                               | 143.23(4) |
|                       |            | O1W–Ba1–O4 <sup>ii</sup>                 | 70.96(4)  |
|                       |            | O1W–Ba1–O4 <sup>iii</sup>                | 78.55(4)  |
|                       |            | O1W–Ba1–O3 <sup>iii</sup>                | 67.07(5)  |
|                       |            | O1W–Ba1–N1 <sup>iv</sup>                 | 126.21(5) |
|                       |            | O1–Ba1–O4 <sup>ii</sup>                  | 77.89(4)  |
|                       |            | O1–Ba1–O4 <sup>iii</sup>                 | 74.32(4)  |
|                       |            | O1–Ba1–O3 <sup>iii</sup>                 | 107.97(4) |
|                       |            | O1–Ba1–N1 <sup>iv</sup>                  | 76.83(5)  |
|                       |            | O4 <sup>ii</sup> –Ba1–O4 <sup>iii</sup>  | 73.74(5)  |
|                       |            | O4 <sup>ii</sup> –Ba1–O3 <sup>iii</sup>  | 110.48(4) |
|                       |            | O4 <sup>ii</sup> –Ba1–N1 <sup>iv</sup>   | 151.54(5) |
|                       |            | O4 <sup>iii</sup> –Ba1–O3 <sup>iii</sup> | 45.82(4)  |
|                       |            | O4 <sup>iii</sup> –Ba1–N1 <sup>iv</sup>  | 86.97(4)  |
|                       |            | O3 <sup>iii</sup> –Ba1–N1 <sup>iv</sup>  | 65.96(5)  |

Symmetry transformations used to generate equivalent atoms:

(i)  $-x, -y+1, -z+1$ ; (ii)  $-x, -y, -z+1$ ; (iii)  $x, y+1, z-1$ ; (iv)  $x, y+1, z$ .

**Table S12.** Geometric information (distances in Å and angles in degrees) for the D–H···O hydrogen bond interactions of the [Ba(aip)(H<sub>2</sub>O)] crystal structure (**6**).<sup>a</sup>

| D–H···O                    | <i>d</i> (H···A) | <i>d</i> (D···A) | ∠ (DHA) |
|----------------------------|------------------|------------------|---------|
| O1W–H1W···O3 <sup>i</sup>  | 1.898(16)        | 2.762(2)         | 173(3)  |
| O1W–H2W···O1 <sup>ii</sup> | 1.884(16)        | 2.762(2)         | 174(2)  |
| N1–H1A···O1 <sup>iii</sup> | 2.35(2)          | 3.058(2)         | 140(2)  |
| N1–H2A···O4 <sup>iv</sup>  | 2.338(18)        | 3.145(2)         | 159(2)  |

<sup>a</sup> Symmetry transformations used to generate equivalent atoms:

(i)  $-x, -y+1, -z+1$ ; (ii)  $-x, -y+1, -z$ ; (iii)  $-x+1, -y, -z$ ; (iv)  $-x+1, -y-1, -z+1$
