# Supplementary material for: From Discrete Complexes to Metal–Organic Layered Materials: Remarkable Hydrogen Bonding Frameworks
Source: MDPI journal article supplement (doi:10.3390/molecules25061353), 2020-03-16
Supplement: s1 [file s1]

# checkCIF () running

Checking for embedded fcf data in CIF ...

Found embedded fcf data in CIF. Extracting fcf data from uploaded CIF, please wait .....

## checkCIF/PLATON (full publication check)

Structure factors have been supplied for datablock(s) I

THIS REPORT IS FOR GUIDANCE ONLY. IF USED AS PART OF A REVIEW PROCEDURE FOR PUBLICATION, IT SHOULD NOT REPLACE THE EXPERTISE OF AN EXPERIENCED CRYSTALLOGRAPHIC REFEREE.

No syntax errors found.

[CIF dictionary](#)  
[Interpreting this report](#)

### Datablock: I

|                                                                                    |                                       |                                  |
|------------------------------------------------------------------------------------|---------------------------------------|----------------------------------|
| Bond precision:                                                                    | C-C = 0.0123 Å                        | Wavelength=0.71073               |
| Cell:                                                                              | a=11.7432(9) b=47.433(3) c=13.9297(9) |                                  |
|                                                                                    | alpha=90 beta=97.143(4) gamma=90      |                                  |
| Temperature:                                                                       | 180 K                                 |                                  |
|                                                                                    | Calculated                            | Reported                         |
| Volume                                                                             | 7698.8(9)                             | 7698.9(10)                       |
| Space group                                                                        | P 21/c                                | P 21/c                           |
| Hall group                                                                         | -P 2ybc                               | -P 2ybc                          |
| Moiety                                                                             | C40 H34 Mg2 N6 O12,                   | C40 H34 Mg2 N6 O12,              |
| formula                                                                            | H2 O                                  | H2 O                             |
| Sum formula                                                                        | C40 H36 Mg2 N6 O13                    | C40 H36 Mg2 N6 O13               |
| Mr                                                                                 | 857.37                                | 857.37                           |
| Dx, g cm-3                                                                         | 1.479                                 | 1.479                            |
| Z                                                                                  | 8                                     | 8                                |
| Mu (mm-1)                                                                          | 0.141                                 | 0.141                            |
| F000                                                                               | 3568.0                                | 3568.0                           |
| F000'                                                                              | 3570.42                               |                                  |
| h, k, lmax                                                                         | 13, 52, 15                            | 13, 52, 15                       |
| Nref                                                                               | 11043                                 | 10997                            |
| Tmin, Tmax                                                                         | 0.967, 0.996                          | 0.967, 0.996                     |
| Tmin'                                                                              | 0.956                                 |                                  |
| Correction method= # Reported T Limits: Tmin=0.967 Tmax=0.996 AbsCorr = MULTI-SCAN |                                       |                                  |
| Data completeness=                                                                 | 0.996                                 | Theta(max)= 23.256               |
| R(reflections)=                                                                    | 0.1085( 6552)                         | wR2(reflections)= 0.3209( 10997) |
| S =                                                                                | 1.044                                 | Npar= 1178                       |

The following ALERTS were generated. Each ALERT has the format

**test-name\_ALERT\_alert-type\_alert-level.**

Click on the hyperlinks for more details of the test.

#### Alert level B

|                                   |                                                            |                                        |
|-----------------------------------|------------------------------------------------------------|----------------------------------------|
| <a href="#">THETM01_ALERT_3_B</a> | The value of sine(theta_max)/wavelength is less than 0.575 |                                        |
|                                   | Calculated sin(theta_max)/wavelength =                     | 0.5555                                 |
| <a href="#">PLAT023_ALERT_3_B</a> | Resolution (too) Low [sin(theta)/Lambda < 0.6]..           | 23.26 Degree                           |
| <a href="#">PLAT213_ALERT_2_B</a> | Atom C7                                                    | has ADP max/min Ratio ..... 4.4 prolat |
| <a href="#">PLAT213_ALERT_2_B</a> | Atom C34                                                   | has ADP max/min Ratio ..... 4.5 prolat |

|                   |                       |           |                         |        |       |
|-------------------|-----------------------|-----------|-------------------------|--------|-------|
| PLAT220_ALERT_2_B | Non-Solvent Resd 1    | C         | Ueq(max)/Ueq(min) Range | 6.2    | Ratio |
| PLAT340_ALERT_3_B | Low Bond Precision on | C-C Bonds | .....                   | 0.0123 | Ang.  |
| PLAT414_ALERT_2_B | Short Intra D-H..H-X  | H12W      | .. H52 ..               | 1.89   | Ang.  |
| PLAT417_ALERT_2_B | Short Inter D-H..H-D  | H1W       | .. H20W ..              | 2.08   | Ang.  |

#### And 3 other PLAT417 Alerts

|                   |                      |      |             |        |       |
|-------------------|----------------------|------|-------------|--------|-------|
| PLAT417_ALERT_2_B | Short Inter D-H..H-D | H3A  | .. H33A ..  | 1.98   | Ang.  |
| PLAT417_ALERT_2_B | Short Inter D-H..H-D | H16W | .. H17W ..  | 2.04   | Ang.  |
| PLAT417_ALERT_2_B | Short Inter D-H..H-D | H16W | .. H18W ..  | 2.09   | Ang.  |
| PLAT420_ALERT_2_B | D-H Without Acceptor | O6W  | -- H12W ... | Please | Check |

#### Alert level C

|                   |                                                                                                                                                                                                     |                             |        |        |
|-------------------|-----------------------------------------------------------------------------------------------------------------------------------------------------------------------------------------------------|-----------------------------|--------|--------|
| ALERT LEVEL 1     |                                                                                                                                                                                                     |                             |        |        |
| DIFMN02_ALERT_2_C | The minimum difference density is DIFMN03_ALERT_1_C The minimum difference density is REFNR01_ALERT_3_C Ratio of reflections to parameters is RFACG01_ALERT_3_C The value of the R factor is > 0.10 |                             |        |        |
|                   | R factor given                                                                                                                                                                                      | 0.108                       |        |        |
| RFACR01_ALERT_3_C | The value of the weighted R factor is > 0.25                                                                                                                                                        |                             |        |        |
|                   | Weighted R factor given                                                                                                                                                                             | 0.321                       |        |        |
| PLAT082_ALERT_2_C | High R1 Value .....                                                                                                                                                                                 | 0.11                        | Report |        |
| PLAT084_ALERT_3_C | High wR2 Value (i.e. > 0.25) .....                                                                                                                                                                  | 0.32                        | Report |        |
| PLAT088_ALERT_3_C | Poor Data / Parameter Ratio .....                                                                                                                                                                   | 9.37                        | Note   |        |
| PLAT098_ALERT_2_C | Large Reported Min. (Negative) Residual Density                                                                                                                                                     | -1.10                       | eA-3   |        |
| PLAT213_ALERT_2_C | Atom O4W                                                                                                                                                                                            | has ADP max/min Ratio ..... | 3.2    | prolat |

#### And 9 other PLAT213 Alerts

|                   |                                             |                       |                           |        |        |
|-------------------|---------------------------------------------|-----------------------|---------------------------|--------|--------|
| PLAT213_ALERT_2_C | Atom O6                                     | has ADP max/min Ratio | .....                     | 3.4    | prolat |
| PLAT213_ALERT_2_C | Atom C5                                     | has ADP max/min Ratio | .....                     | 3.2    | prolat |
| PLAT213_ALERT_2_C | Atom C8                                     | has ADP max/min Ratio | .....                     | 3.1    | prolat |
| PLAT213_ALERT_2_C | Atom C9                                     | has ADP max/min Ratio | .....                     | 3.2    | prolat |
| PLAT213_ALERT_2_C | Atom C10                                    | has ADP max/min Ratio | .....                     | 3.3    | prolat |
| PLAT213_ALERT_2_C | Atom C11                                    | has ADP max/min Ratio | .....                     | 3.3    | prolat |
| PLAT213_ALERT_2_C | Atom C16                                    | has ADP max/min Ratio | .....                     | 3.3    | oblate |
| PLAT213_ALERT_2_C | Atom C35                                    | has ADP max/min Ratio | .....                     | 3.5    | prolat |
| PLAT213_ALERT_2_C | Atom C75                                    | has ADP max/min Ratio | .....                     | 3.4    | prolat |
| PLAT220_ALERT_2_C | Non-Solvent Resd 2                          | C                     | Ueq(max)/Ueq(min) Range   | 4.0    | Ratio  |
| PLAT222_ALERT_3_C | Non-Solvent Resd 1                          | H                     | Uiso(max)/Uiso(min) Range | 5.2    | Ratio  |
| PLAT234_ALERT_4_C | Large Hirshfeld Difference C75              | -- C78                | ..                        | 0.18   | Ang.   |
| PLAT234_ALERT_4_C | Large Hirshfeld Difference C76              | -- C77                | ..                        | 0.17   | Ang.   |
| PLAT250_ALERT_2_C | Large U3/U1 Ratio for Average U(i,j) Tensor | ....                  | 2.3                       | Note   |        |
| PLAT420_ALERT_2_C | D-H Without Acceptor                        | N4                    | -- H3A ...                | Please | Check  |
| PLAT420_ALERT_2_C | D-H Without Acceptor                        | N9                    | -- H6A ...                | Please | Check  |

#### Alert level G

|                   |                                                  |       |        |  |
|-------------------|--------------------------------------------------|-------|--------|--|
| PLAT002_ALERT_2_G | Number of Distance or Angle Restraints on AtSite | 39    | Note   |  |
| PLAT003_ALERT_2_G | Number of Uiso or Uij Restrained non-H Atoms ... | 1     | Report |  |
| PLAT007_ALERT_5_G | Number of Unrefined Donor-H Atoms                | 2     | Report |  |
| PLAT066_ALERT_1_G | Predicted and Reported Tmin&Tmax Range Identical | ?     | Check  |  |
| PLAT072_ALERT_2_G | SHELXL First Parameter in WGHT Unusually Large   | 0.17  | Report |  |
| PLAT083_ALERT_2_G | SHELXL Second Parameter in WGHT Unusually Large  | 35.63 | Why ?  |  |
| PLAT172_ALERT_4_G | The CIF-Embedded .res File Contains DFIX Records | 26    | Report |  |
| PLAT186_ALERT_4_G | The CIF-Embedded .res File Contains ISOR Records | 1     | Report |  |
| PLAT333_ALERT_2_G | Check Large Av C6-Ring C-C Dist. C4 -C9          | 1.42  | Ang.   |  |
| PLAT790_ALERT_4_G | Centre of Gravity not Within Unit Cell: Resd. #  | 2     | Note   |  |
|                   | C40 H34 Mg2 N6 O12                               |       |        |  |
| PLAT790_ALERT_4_G | Centre of Gravity not Within Unit Cell: Resd. #  | 4     | Note   |  |
|                   | H2 O                                             |       |        |  |
| PLAT860_ALERT_3_G | Number of Least-Squares Restraints               | 45    | Note   |  |

0 **ALERT level A** = Most likely a serious problem - resolve or explain  
12 **ALERT level B** = A potentially serious problem, consider carefully  
26 **ALERT level C** = Check. Ensure it is not caused by an omission or oversight  
12 **ALERT level G** = General information/check it is not something unexpected

2 ALERT type 1 CIF construction/syntax error, inconsistent or missing data  
31 ALERT type 2 Indicator that the structure model may be wrong or deficient

10 ALERT type 3 Indicator that the structure quality may be low  
6 ALERT type 4 Improvement, methodology, query or suggestion  
1 ALERT type 5 Informative message, check

---

## checkCIF publication errors

### 🔴 Alert level A

---

PUBL004\_ALERT\_1\_A The contact author's name and address are missing,  
\_publ\_contact\_author\_name and \_publ\_contact\_author\_address.  
PUBL005\_ALERT\_1\_A \_publ\_contact\_author\_email, \_publ\_contact\_author\_fax and  
\_publ\_contact\_author\_phone are all missing.  
At least one of these should be present.  
PUBL006\_ALERT\_1\_A \_publ\_requested\_journal is missing  
e.g. 'Acta Crystallographica Section C'  
PUBL008\_ALERT\_1\_A \_publ\_section\_title is missing. Title of paper.  
PUBL009\_ALERT\_1\_A \_publ\_author\_name is missing. List of author(s) name(s).  
PUBL010\_ALERT\_1\_A \_publ\_author\_address is missing. Author(s) address(es).  
PUBL012\_ALERT\_1\_A \_publ\_section\_abstract is missing.  
Abstract of paper in English.

---

### 🟡 Alert level G

---

PUBL017\_ALERT\_1\_G The \_publ\_section\_references section is missing or  
empty.

---

---

7 **ALERT level A** = Data missing that is essential or data in wrong format  
1 **ALERT level G** = General alerts. Data that may be required is missing

---

### Publication of your CIF

You should attempt to resolve as many as possible of the alerts in all categories. Often the minor alerts point to easily fixed oversights, errors and omissions in your CIF or refinement strategy, so attention to these fine details can be worthwhile. In order to resolve some of the more serious problems it may be necessary to carry out additional measurements or structure refinements. However, the nature of your study may justify the reported deviations from journal submission requirements and the more serious of these should be commented upon in the discussion or experimental section of a paper or in the "special\_details" fields of the CIF. *checkCIF* was carefully designed to identify outliers and unusual parameters, but every test has its limitations and alerts that are not important in a particular case may appear. Conversely, the absence of alerts does not guarantee there are no aspects of the results needing attention. It is up to the individual to critically assess their own results and, if necessary, seek expert advice.

If level A alerts remain, which you believe to be justified deviations, and you intend to submit this CIF for publication in a journal, you should additionally insert an explanation in your CIF using the Validation Reply Form (VRF) below. This will allow your explanation to be considered as part of the review process.

### Validation response form

Please find below a validation response form (VRF) that can be filled in and pasted into your CIF.

```
# start Validation Reply Form
_vrf_PUBL004_GLOBAL
;
PROBLEM: The contact author's name and address are missing,
RESPONSE: ...
;
_vrf_PUBL005_GLOBAL
;
PROBLEM: _publ_contact_author_email, _publ_contact_author_fax and
RESPONSE: ...
;
_vrf_PUBL006_GLOBAL
;
PROBLEM: _publ_requested_journal is missing
RESPONSE: ...
;
_vrf_PUBL008_GLOBAL
;
PROBLEM: _publ_section_title is missing. Title of paper.
RESPONSE: ...
;
_vrf_PUBL009_GLOBAL
;
PROBLEM: _publ_author_name is missing. List of author(s) name(s).
```

```

RESPONSE: ...
;
_vrf_PUBL010_GLOBAL
;
PROBLEM: _publ_author_address is missing. Author(s) address(es).
RESPONSE: ...
;
_vrf_PUBL012_GLOBAL
;
PROBLEM: _publ_section_abstract is missing.
RESPONSE: ...
;
# end Validation Reply Form

```

If you wish to submit your CIF for publication in Acta Crystallographica Section C or E, you should upload your CIF via [the web](#). If you wish to submit your CIF for publication in IUCrData you should upload your CIF via [the web](#). If your CIF is to form part of a submission to another IUCr journal, you will be asked, either during electronic [submission](#) or by the Co-editor handling your paper, to upload your CIF via our web site.

---

**PLATON version of 11/08/2016; check.def file version of 04/08/2016**

### Datablock I - ellipsoid plot

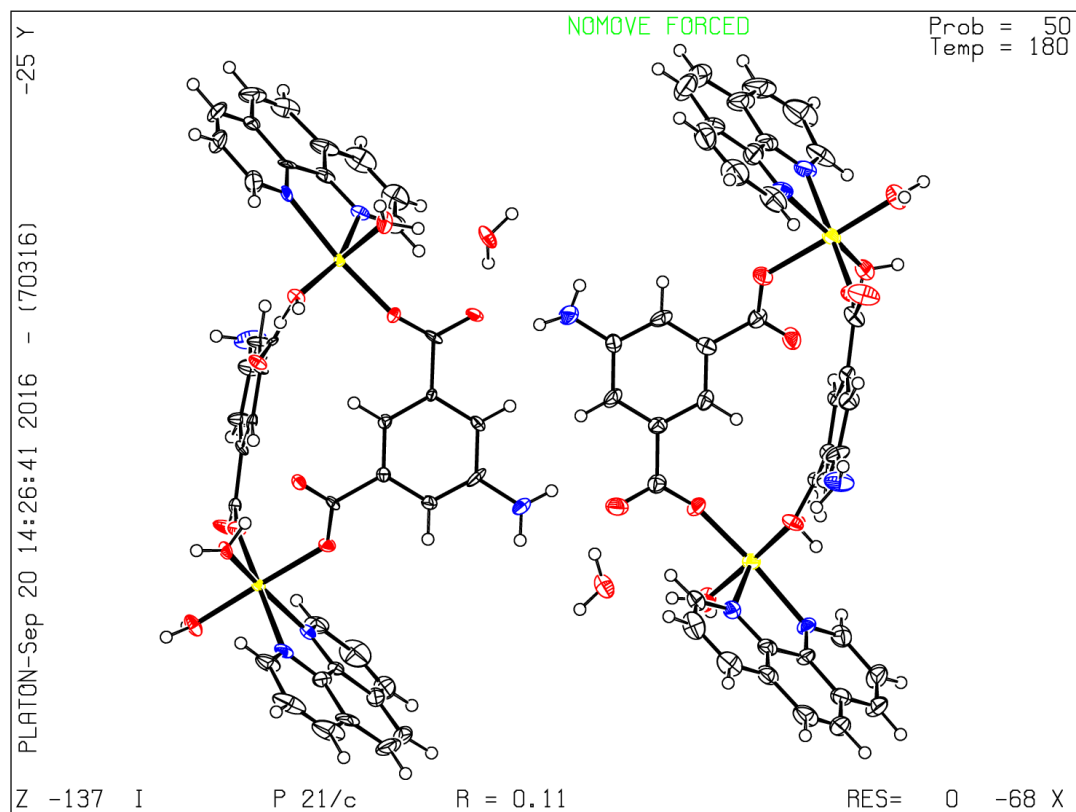


---

[Download CIF editor \(publCIF\) from the IUCr](#)  
[Download CIF editor \(enCIFer\) from the CCDC](#)  
[Test a new CIF entry](#)
