# Supplementary material for: From Discrete Complexes to Metal–Organic Layered Materials: Remarkable Hydrogen Bonding Frameworks
Source: Molecules. 2020 Mar 16;25(6):1353. doi: 10.3390/molecules25061353 (PMC7146137; doi:10.3390/molecules25061353)
Supplement: Supplementary file 1 [file molecules-25-01353-s001.zip]

Archive with 13 entries (13 files):
- 1_checkCIF.pdf
- 1_LCS1913.CIF
- 2_checkCIF.pdf
- 2_LCS1514c.cif
- 3_checkCIF.pdf
- 3_LCS0412.CIF
- 4_checkCIF.pdf
- 4_LCS1013.CIF
- 5_checkCIF.pdf
- 5_LCS3812.CIF
- 6_checkCIF.pdf
- 6_LCS3712.CIF
- molecules-721425-supplementary material.pdf
