# Supplementary material for: From Discrete Complexes to Metal–Organic Layered Materials: Remarkable Hydrogen Bonding Frameworks
Source: Molecules. 2020 Mar 16;25(6):1353. doi: 10.3390/molecules25061353 (PMC7146137; doi:10.3390/molecules25061353)
Supplement: Supplementary file 1 [file molecules-25-01353-s001.zip › 1_LCS1913.CIF]

data_general

_publ_contact_author_name         'Dr Lu\'is Cunha Silva'
_publ_contact_author_address
; LAQV/REQUIMTE & Dep. of Chemistry and Biochemistry
  Faculty of Sciences
  University of Porto
  4169-007 Porto
  Portugal
;

_publ_contact_author_email        'l.cunha.silva@fc.up.pt'
_publ_contact_author_fax          '+351 220402576'
_publ_contact_author_phone        '+351 220402659'

_journal_name_full                'Molecules'

loop_
_publ_author_name
_publ_author_footnote
_publ_author_address

'Carla, Queir\�s'  .
; LAQV/REQUIMTE & Dep. of Chemistry and Biochemistry
  Faculty of Sciences
  University of Porto
  4169-007 Porto
  Portugal
; 

'Silva, Ana M. G.'  .
; LAQV/REQUIMTE & Dep. of Chemistry and Biochemistry
  Faculty of Sciences
  University of Porto
  4169-007 Porto
  Portugal
;

'Castro, Baltazar de'  .
; LAQV/REQUIMTE & Dep. of Chemistry and Biochemistry
  Faculty of Sciences
  University of Porto
  4169-007 Porto
  Portugal
;

'Cunha-Silva, Lu\'is'  .
; LAQV/REQUIMTE & Dep. of Chemistry and Biochemistry
  Faculty of Sciences
  University of Porto
  4169-007 Porto
  Portugal
;

f 
data_lcs1913 
 
# ========================================================================= #
 
_audit_creation_method            'SHELXL-97, manual editing plus enCIFer'
_audit_creation_date              '17 March 2014'

# ========================================================================= #

_chemical_name_systematic 
; 
 ? 
; 
_chemical_name_common             ? 
_chemical_melting_point           ? 
_chemical_formula_moiety          
     'C8 H26 Mg2 N O14, C8 H5 N O4 3(C8 H6 N O4), H12 Mg O6, 10(H2 O)' 
_chemical_formula_sum             'C40 H81 Mg3 N5 O46' 
_chemical_formula_weight          1441.03 
 
loop_ 
 _atom_type_symbol 
 _atom_type_description 
 _atom_type_scat_dispersion_real 
 _atom_type_scat_dispersion_imag 
 _atom_type_scat_source 
 'C'  'C'   0.0033   0.0016 
 'International Tables Vol C Tables 4.2.6.8 and 6.1.1.4' 
 'H'  'H'   0.0000   0.0000 
 'International Tables Vol C Tables 4.2.6.8 and 6.1.1.4' 
 'N'  'N'   0.0061   0.0033 
 'International Tables Vol C Tables 4.2.6.8 and 6.1.1.4' 
 'O'  'O'   0.0106   0.0060 
 'International Tables Vol C Tables 4.2.6.8 and 6.1.1.4' 
 'Mg'  'Mg'   0.0486   0.0363 
 'International Tables Vol C Tables 4.2.6.8 and 6.1.1.4' 
 
_symmetry_cell_setting            Monoclinic 
_symmetry_space_group_name_H-M    'P 21/c' 
_symmetry_space_group_name_Hall   '-P 2ybc1'
 
loop_ 
 _symmetry_equiv_pos_as_xyz 
 'x, y, z' 
 '-x, y+1/2, -z+1/2' 
 '-x, -y, -z' 
 'x, -y-1/2, z-1/2' 
 
_cell_length_a                    17.6784(10) 
_cell_length_b                    29.6003(18) 
_cell_length_c                    11.7133(7) 
_cell_angle_alpha                 90.00 
_cell_angle_beta                  98.049(4) 
_cell_angle_gamma                 90.00 
_cell_volume                      6069.0(6) 
_cell_formula_units_Z             4 
_cell_measurement_temperature     150(2) 
_cell_measurement_reflns_used     4710 
_cell_measurement_theta_min       2.40 
_cell_measurement_theta_max       24.90 
 
_exptl_crystal_description        block 
_exptl_crystal_colour             colourless 
_exptl_crystal_size_max           0.15 
_exptl_crystal_size_mid           0.12 
_exptl_crystal_size_min           0.08 
_exptl_crystal_density_meas       ? 
_exptl_crystal_density_diffrn     1.577 
_exptl_crystal_density_method     'not measured' 
_exptl_crystal_F_000              3040 
_exptl_absorpt_coefficient_mu     0.171 
_exptl_absorpt_correction_type    multi-scan 
_exptl_absorpt_correction_T_min   0.9748 
_exptl_absorpt_correction_T_max   0.9864 
_exptl_absorpt_process_details    
;
 SADABS (Sheldrick, 1997)
;       
 
_exptl_special_details 
; 
 ? 
; 
 
_diffrn_ambient_temperature       150(2) 
_diffrn_radiation_wavelength      0.71073 
_diffrn_radiation_type            MoK\a 
_diffrn_radiation_source          'fine-focus sealed tube' 
_diffrn_radiation_monochromator   graphite 
_diffrn_measurement_device_type   'Bruker X8 Kappa CCD APEX II'
_diffrn_measurement_method        'omega/phi scans'
_diffrn_detector_area_resol_mean  ? 
_diffrn_standards_number          ? 
_diffrn_standards_interval_count  ? 
_diffrn_standards_interval_time   ? 
_diffrn_standards_decay_%         ? 
_diffrn_reflns_number             87367 
_diffrn_reflns_av_R_equivalents   0.1469 
_diffrn_reflns_av_sigmaI/netI     0.1074 
_diffrn_reflns_limit_h_min        -21 
_diffrn_reflns_limit_h_max        21 
_diffrn_reflns_limit_k_min        -36 
_diffrn_reflns_limit_k_max        34 
_diffrn_reflns_limit_l_min        -14 
_diffrn_reflns_limit_l_max        14 
_diffrn_reflns_theta_min          3.73 
_diffrn_reflns_theta_max          25.68 
_reflns_number_total              11485 
_reflns_number_gt                 6035 
_reflns_threshold_expression      >2sigma(I) 
 
_computing_data_collection        'APEX2 (Bruker, 2006)' 
_computing_cell_refinement        'APEX2 '
_computing_data_reduction         'SAINT+ (Bruker, 1997-2005)' 
_computing_structure_solution     'SHELXTL (Bruker 2001)' 
_computing_structure_refinement   'SHELXTL '
_computing_molecular_graphics     'SHELXTL ' 
_computing_publication_material   'SHELXTL ' 
 
_refine_special_details 
; 
 Refinement of F^2^ against ALL reflections.  The weighted R-factor wR and 
 goodness of fit S are based on F^2^, conventional R-factors R are based 
 on F, with F set to zero for negative F^2^. The threshold expression of 
 F^2^ > 2sigma(F^2^) is used only for calculating R-factors(gt) etc. and is 
 not relevant to the choice of reflections for refinement.  R-factors based 
 on F^2^ are statistically about twice as large as those based on F, and R- 
 factors based on ALL data will be even larger. 
; 
 
_refine_ls_structure_factor_coef  Fsqd  
_refine_ls_matrix_type            full 
_refine_ls_weighting_scheme       calc  
_refine_ls_weighting_details 
 'calc w=1/[\s^2^(Fo^2^)+(0.1095P)^2^+11.0725P] where P=(Fo^2^+2Fc^2^)/3' 
_atom_sites_solution_primary      direct 
_atom_sites_solution_secondary    difmap 
_atom_sites_solution_hydrogens    geom 
_refine_ls_hydrogen_treatment     mixed 
_refine_ls_extinction_method      none 
_refine_ls_extinction_coef        ? 
_refine_ls_number_reflns          11485 
_refine_ls_number_parameters      1045 
_refine_ls_number_restraints      110 
_refine_ls_R_factor_all           0.1603 
_refine_ls_R_factor_gt            0.0793 
_refine_ls_wR_factor_ref          0.2399 
_refine_ls_wR_factor_gt           0.1939 
_refine_ls_goodness_of_fit_ref    1.022 
_refine_ls_restrained_S_all       1.238 
_refine_ls_shift/su_max           0.000 
_refine_ls_shift/su_mean          0.000 
 
loop_ 
 _atom_site_label 
 _atom_site_type_symbol 
 _atom_site_fract_x 
 _atom_site_fract_y 
 _atom_site_fract_z 
 _atom_site_U_iso_or_equiv 
 _atom_site_adp_type 
 _atom_site_occupancy 
 _atom_site_symmetry_multiplicity 
 _atom_site_calc_flag 
 _atom_site_refinement_flags 
 _atom_site_disorder_assembly 
 _atom_site_disorder_group 
Mg1 Mg -0.00520(11) 0.68869(7) 0.57977(17) 0.0124(5) Uani 1 1 d . . . 
Mg2 Mg 0.29555(12) 0.69530(7) 0.21653(17) 0.0148(5) Uani 1 1 d . . . 
Mg3 Mg 0.35422(12) 0.25917(7) 0.60387(19) 0.0156(5) Uani 1 1 d . . . 
O1 O 0.0269(2) 0.63610(13) 0.4853(3) 0.0141(10) Uani 1 1 d . . . 
O2 O -0.0065(2) 0.57153(14) 0.5627(4) 0.0169(10) Uani 1 1 d . . . 
O3 O 0.2629(2) 0.64196(13) 0.3113(4) 0.0160(10) Uani 1 1 d . . . 
O4 O 0.3009(2) 0.57976(14) 0.2268(4) 0.0178(10) Uani 1 1 d . . . 
O5 O 0.2099(2) 0.62752(14) 0.6802(4) 0.0167(10) Uani 1 1 d . . . 
O6 O 0.2099(2) 0.56410(14) 0.7828(4) 0.0180(10) Uani 1 1 d . . . 
O7 O 0.4523(2) 0.64844(14) 0.4933(4) 0.0167(10) Uani 1 1 d . . . 
O8 O 0.4808(3) 0.58931(16) 0.3901(4) 0.0286(12) Uani 1 1 d . . . 
O9 O 0.2849(3) 0.43137(16) 0.3062(5) 0.0372(14) Uani 1 1 d . . . 
O10 O 0.3452(2) 0.36488(14) 0.3158(4) 0.0177(10) Uani 1 1 d . . . 
O11 O 0.5928(2) 0.35963(14) 0.1319(4) 0.0155(10) Uani 1 1 d . . . 
O12 O 0.6170(2) 0.42024(14) 0.0297(4) 0.0174(10) Uani 1 1 d . . . 
O13 O -0.0867(2) 0.43249(13) 0.9849(4) 0.0131(9) Uani 1 1 d . . . 
O14 O -0.0831(2) 0.36925(13) 0.8832(3) 0.0121(9) Uani 1 1 d U . . 
O15 O 0.2050(3) 0.41290(15) 0.6240(4) 0.0257(12) Uani 1 1 d . . . 
O16 O 0.1638(2) 0.35236(13) 0.7081(4) 0.0143(10) Uani 1 1 d . . . 
O17 O 0.3907(3) 0.43178(15) 0.8367(4) 0.0254(11) Uani 1 1 d U . . 
O18 O 0.3582(3) 0.36361(14) 0.8910(4) 0.0181(10) Uani 1 1 d . . . 
O19 O 0.0865(2) 0.41597(13) 1.1764(4) 0.0136(10) Uani 1 1 d . . . 
O20 O 0.1123(2) 0.35624(13) 1.0727(4) 0.0154(10) Uani 1 1 d . . . 
N1 N 0.1634(3) 0.45282(19) 0.4111(6) 0.0218(14) Uani 1 1 d D . . 
H1A H 0.120(2) 0.446(2) 0.372(6) 0.033 Uiso 1 1 d D . . 
H2A H 0.202(3) 0.442(2) 0.381(6) 0.033 Uiso 1 1 d D . . 
H3A H 0.179(4) 0.442(2) 0.481(3) 0.033 Uiso 1 1 d D . . 
N2 N 0.3652(4) 0.45549(19) 0.5771(6) 0.0260(15) Uani 1 1 d D . . 
H4A H 0.341(4) 0.446(3) 0.632(5) 0.039 Uiso 1 1 d D . . 
H5A H 0.410(2) 0.447(2) 0.566(7) 0.039 Uiso 1 1 d D . . 
N3 N 0.4628(3) 0.54627(17) 0.1765(5) 0.0121(11) Uani 1 1 d D . . 
H6A H 0.446(3) 0.555(2) 0.240(4) 0.018 Uiso 1 1 d D . . 
H7A H 0.436(3) 0.555(2) 0.112(3) 0.018 Uiso 1 1 d D . . 
H8A H 0.5097(18) 0.555(2) 0.172(5) 0.018 Uiso 1 1 d D . . 
N4 N 0.2357(3) 0.54445(17) 1.0221(5) 0.0107(11) Uani 1 1 d D . . 
H9A H 0.263(3) 0.555(2) 0.974(4) 0.016 Uiso 1 1 d D . . 
H10A H 0.258(3) 0.553(2) 1.090(3) 0.016 Uiso 1 1 d D . . 
H11A H 0.1906(19) 0.5562(19) 1.013(5) 0.016 Uiso 1 1 d D . . 
N5 N 0.0620(3) 0.54483(17) 0.7766(4) 0.0100(11) Uani 1 1 d D . . 
H12A H 0.1109(16) 0.553(2) 0.785(5) 0.015 Uiso 1 1 d D . . 
H13A H 0.041(3) 0.553(2) 0.708(3) 0.015 Uiso 1 1 d D . . 
H14A H 0.041(3) 0.5606(18) 0.825(4) 0.015 Uiso 1 1 d D . . 
C39 C 0.2387(3) 0.4024(2) 1.0003(5) 0.0101(13) Uani 1 1 d . . . 
H39 H 0.2406 0.3704 0.9970 0.012 Uiso 1 1 calc R . . 
C36 C 0.2360(3) 0.49542(19) 1.0131(5) 0.0079(12) Uani 1 1 d . . . 
C33 C 0.1229(3) 0.39676(19) 1.1062(5) 0.0097(13) Uani 1 1 d . . . 
C19 C 0.4046(3) 0.4757(2) 0.2322(5) 0.0124(13) Uani 1 1 d . . . 
H19 H 0.3664 0.4929 0.2621 0.015 Uiso 1 1 calc R . . 
C37 C 0.2890(3) 0.47497(19) 0.9542(5) 0.0106(13) Uani 1 1 d . . . 
H37 H 0.3233 0.4926 0.9171 0.013 Uiso 1 1 calc R . . 
C34 C 0.1830(3) 0.42353(19) 1.0554(5) 0.0108(13) Uani 1 1 d . . . 
C22 C 0.5167(3) 0.42558(19) 0.1452(5) 0.0086(13) Uani 1 1 d . . . 
C20 C 0.4609(3) 0.49695(19) 0.1826(5) 0.0097(13) Uani 1 1 d . . . 
C21 C 0.5170(3) 0.47227(19) 0.1380(5) 0.0097(13) Uani 1 1 d . . . 
H21 H 0.5551 0.4873 0.1028 0.012 Uiso 1 1 calc R . . 
C38 C 0.2914(3) 0.42774(19) 0.9502(5) 0.0101(13) Uani 1 1 d . . . 
C35 C 0.1834(3) 0.47056(19) 1.0638(5) 0.0085(13) Uani 1 1 d U . . 
H35 H 0.1477 0.4855 1.1042 0.010 Uiso 1 1 calc R . . 
C18 C 0.4038(3) 0.42891(19) 0.2383(5) 0.0113(13) Uani 1 1 d . . . 
C24 C 0.5794(3) 0.4000(2) 0.0980(5) 0.0116(13) Uani 1 1 d . . . 
C17 C 0.3395(4) 0.4063(2) 0.2915(6) 0.0175(15) Uani 1 1 d . . . 
C23 C 0.4607(3) 0.4038(2) 0.1957(5) 0.0131(14) Uani 1 1 d . . . 
H23 H 0.4608 0.3718 0.2014 0.016 Uiso 1 1 calc R . . 
C40 C 0.3526(3) 0.4061(2) 0.8900(5) 0.0136(14) Uani 1 1 d . . . 
C7 C 0.1469(3) 0.59455(19) 0.3961(5) 0.0099(12) Uani 1 1 d . . . 
H7 H 0.1439 0.6266 0.3941 0.012 Uiso 1 1 calc R . . 
C1 C 0.0335(3) 0.59428(19) 0.5022(5) 0.0080(13) Uani 1 1 d . . . 
C3 C 0.0999(3) 0.52349(19) 0.4526(5) 0.0121(14) Uani 1 1 d . . . 
H3 H 0.0649 0.5065 0.4900 0.015 Uiso 1 1 calc R . . 
C2 C 0.0949(3) 0.57007(19) 0.4471(5) 0.0090(13) Uani 1 1 d . . . 
C6 C 0.2039(3) 0.57270(19) 0.3476(5) 0.0106(13) Uani 1 1 d . . . 
C4 C 0.1566(3) 0.50199(19) 0.4029(5) 0.0118(13) Uani 1 1 d . . . 
C5 C 0.2091(3) 0.5259(2) 0.3504(5) 0.0134(14) Uani 1 1 d . . . 
H5 H 0.2479 0.5107 0.3170 0.016 Uiso 1 1 calc R . . 
C8 C 0.2603(3) 0.6003(2) 0.2906(5) 0.0124(14) Uani 1 1 d . . . 
C31 C 0.0499(3) 0.4029(2) 0.7962(5) 0.0099(13) Uani 1 1 d . . . 
H31 H 0.0456 0.3709 0.7978 0.012 Uiso 1 1 calc R . . 
C28 C 0.0592(3) 0.49593(19) 0.7857(5) 0.0075(12) Uani 1 1 d . . . 
C32 C 0.1617(3) 0.3944(2) 0.6871(5) 0.0133(14) Uani 1 1 d . . . 
C27 C 0.0058(3) 0.4763(2) 0.8446(5) 0.0105(13) Uani 1 1 d . . . 
H27 H -0.0269 0.4948 0.8826 0.013 Uiso 1 1 calc R . . 
C26 C -0.0006(3) 0.4296(2) 0.8490(5) 0.0097(13) Uani 1 1 d . . . 
C29 C 0.1101(3) 0.46961(19) 0.7346(5) 0.0103(13) Uani 1 1 d . . . 
H29 H 0.1474 0.4835 0.6953 0.012 Uiso 1 1 calc R . . 
C25 C -0.0615(3) 0.40901(19) 0.9110(5) 0.0079(12) Uani 1 1 d . . . 
C30 C 0.1062(3) 0.42289(19) 0.7412(5) 0.0093(13) Uani 1 1 d . . . 
C15 C 0.3416(3) 0.5966(2) 0.5879(5) 0.0114(13) Uani 1 1 d . . . 
H15 H 0.3354 0.6285 0.5895 0.014 Uiso 1 1 calc R . . 
C10 C 0.2961(3) 0.5687(2) 0.6454(5) 0.0106(13) Uani 1 1 d . . . 
C14 C 0.3965(3) 0.5775(2) 0.5279(5) 0.0138(14) Uani 1 1 d . . . 
C16 C 0.4476(4) 0.6066(2) 0.4666(6) 0.0176(15) Uani 1 1 d . . . 
C13 C 0.4036(3) 0.5305(2) 0.5236(5) 0.0152(14) Uani 1 1 d . . . 
H13 H 0.4391 0.5175 0.4794 0.018 Uiso 1 1 calc R . . 
C11 C 0.3057(3) 0.5219(2) 0.6449(5) 0.0143(14) Uani 1 1 d . . . 
H11 H 0.2756 0.5032 0.6869 0.017 Uiso 1 1 calc R . . 
C9 C 0.2349(3) 0.5882(2) 0.7072(5) 0.0136(14) Uani 1 1 d . . . 
C12 C 0.3591(3) 0.5023(2) 0.5833(5) 0.0162(15) Uani 1 1 d . . . 
O1W O 0.0764(3) 0.67136(18) 0.7155(4) 0.0270(12) Uani 1 1 d D . . 
H1W H 0.069(4) 0.676(2) 0.788(3) 0.040 Uiso 1 1 d D . . 
H2W H 0.119(3) 0.656(2) 0.711(5) 0.040 Uiso 1 1 d D . . 
O2W O -0.0830(2) 0.65414(14) 0.6607(4) 0.0159(10) Uani 1 1 d D . . 
H3W H -0.071(3) 0.6296(14) 0.702(5) 0.024 Uiso 1 1 d D . . 
H4W H -0.1313(18) 0.653(2) 0.628(5) 0.024 Uiso 1 1 d D . . 
O3W O -0.0336(2) 0.74621(13) 0.6654(4) 0.0132(10) Uani 1 1 d D . . 
H5W H 0.000(3) 0.7623(16) 0.712(4) 0.020 Uiso 1 1 d D . . 
H6W H -0.070(2) 0.7644(16) 0.630(5) 0.020 Uiso 1 1 d D . . 
O4W O -0.0903(3) 0.70553(14) 0.4502(4) 0.0175(10) Uani 1 1 d D . . 
H7W H -0.118(3) 0.7299(12) 0.418(5) 0.026 Uiso 1 1 d D . . 
H8W H -0.105(4) 0.6825(13) 0.399(4) 0.026 Uiso 1 1 d D . . 
O5W O 0.0743(3) 0.72744(15) 0.5070(4) 0.0215(11) Uani 1 1 d D . . 
H9W H 0.1241(17) 0.7215(19) 0.504(6) 0.032 Uiso 1 1 d D . . 
H10W H 0.061(3) 0.7553(12) 0.483(6) 0.032 Uiso 1 1 d D . . 
O6W O 0.2192(3) 0.73454(16) 0.2893(4) 0.0246(11) Uani 1 1 d D . . 
H11W H 0.1688(16) 0.730(2) 0.287(6) 0.037 Uiso 1 1 d D . . 
H12W H 0.233(3) 0.7610(14) 0.322(6) 0.037 Uiso 1 1 d D . . 
O7W O 0.2119(3) 0.67946(17) 0.0815(4) 0.0259(12) Uani 1 1 d D . . 
H13W H 0.175(3) 0.6580(19) 0.087(5) 0.039 Uiso 1 1 d D . . 
H14W H 0.218(4) 0.681(2) 0.005(3) 0.039 Uiso 1 1 d D . . 
O8W O 0.3280(2) 0.75067(13) 0.1270(4) 0.0157(10) Uani 1 1 d D . . 
H15W H 0.289(2) 0.7682(16) 0.091(5) 0.024 Uiso 1 1 d D . . 
H16W H 0.364(2) 0.7698(16) 0.164(5) 0.024 Uiso 1 1 d D . . 
O9W O 0.3690(3) 0.65699(15) 0.1350(4) 0.0220(11) Uani 1 1 d D . . 
H17W H 0.350(3) 0.6293(12) 0.143(6) 0.033 Uiso 1 1 d D . . 
H18W H 0.4184(17) 0.658(2) 0.166(6) 0.033 Uiso 1 1 d D . . 
O10W O 0.3834(3) 0.71023(15) 0.3439(4) 0.0234(11) Uani 1 1 d D . . 
H19W H 0.3380(18) 0.699(2) 0.356(6) 0.035 Uiso 1 1 d D . . 
H20W H 0.419(3) 0.6873(16) 0.359(6) 0.035 Uiso 1 1 d D . . 
O11W O 0.3028(3) 0.30775(15) 0.6979(4) 0.0205(11) Uani 1 1 d D . . 
H21W H 0.259(2) 0.323(2) 0.693(5) 0.031 Uiso 1 1 d D . . 
H22W H 0.336(3) 0.317(2) 0.758(4) 0.031 Uiso 1 1 d D . . 
O12W O 0.2990(3) 0.20832(16) 0.6790(4) 0.0245(11) Uani 1 1 d D . . 
H23W H 0.256(3) 0.214(2) 0.712(6) 0.037 Uiso 1 1 d D . . 
H24W H 0.320(4) 0.1851(17) 0.722(5) 0.037 Uiso 1 1 d D . . 
O13W O 0.4464(2) 0.26176(15) 0.7301(4) 0.0213(11) Uani 1 1 d D . . 
H25W H 0.471(3) 0.2886(11) 0.750(6) 0.032 Uiso 1 1 d D . . 
H26W H 0.477(3) 0.2393(13) 0.763(5) 0.032 Uiso 1 1 d D . . 
O14W O 0.2634(2) 0.26266(15) 0.4775(4) 0.0191(10) Uani 1 1 d D . . 
H27W H 0.230(3) 0.2411(13) 0.451(6) 0.029 Uiso 1 1 d D . . 
H28W H 0.244(3) 0.2901(9) 0.460(6) 0.029 Uiso 1 1 d D . . 
O15W O 0.4068(3) 0.30867(15) 0.5118(4) 0.0225(11) Uani 1 1 d D . . 
H29W H 0.386(4) 0.3350(15) 0.539(5) 0.034 Uiso 1 1 d D . . 
H30W H 0.395(4) 0.313(2) 0.433(2) 0.034 Uiso 1 1 d D . . 
O16W O 0.4088(3) 0.20828(15) 0.5273(4) 0.0246(11) Uani 1 1 d D . . 
H31W H 0.392(4) 0.1914(19) 0.465(3) 0.037 Uiso 1 1 d D . . 
H32W H 0.391(4) 0.196(2) 0.589(3) 0.037 Uiso 1 1 d D . . 
O17W O -0.1510(2) 0.80231(13) 0.5965(4) 0.0129(9) Uani 1 1 d D . . 
H33W H -0.149(4) 0.8188(16) 0.661(3) 0.019 Uiso 1 1 d D . . 
H34W H -0.147(4) 0.8202(16) 0.536(3) 0.019 Uiso 1 1 d D . . 
O18W O -0.1434(3) 0.77677(15) 0.3170(4) 0.0195(10) Uani 1 1 d D . . 
H35W H -0.115(3) 0.7735(19) 0.262(4) 0.029 Uiso 1 1 d D . . 
H36W H -0.138(4) 0.8032(13) 0.354(5) 0.029 Uiso 1 1 d D . . 
O19W O -0.2270(3) 0.64785(14) 0.5537(4) 0.0176(10) Uani 1 1 d D . . 
H37W H -0.221(4) 0.6285(17) 0.499(4) 0.026 Uiso 1 1 d D . . 
H38W H -0.261(3) 0.640(2) 0.597(5) 0.026 Uiso 1 1 d D . . 
O20W O 0.0341(2) 0.68391(15) 0.9287(4) 0.0172(10) Uani 1 1 d D . . 
H39W H -0.0150(17) 0.682(2) 0.901(5) 0.026 Uiso 1 1 d D . . 
H40W H 0.046(3) 0.6635(18) 0.986(4) 0.026 Uiso 1 1 d D . . 
O21W O 0.2607(3) 0.67760(16) 0.8716(4) 0.0208(11) Uani 1 1 d D . . 
H41W H 0.243(4) 0.6623(18) 0.806(4) 0.031 Uiso 1 1 d D . . 
H42W H 0.291(3) 0.7005(16) 0.855(5) 0.031 Uiso 1 1 d D . . 
O22W O 0.2218(3) 0.69208(14) 0.5198(4) 0.0170(10) Uani 1 1 d D . . 
H43W H 0.219(4) 0.6672(14) 0.563(4) 0.025 Uiso 1 1 d D . . 
H44W H 0.233(4) 0.6833(18) 0.450(3) 0.025 Uiso 1 1 d D . . 
O23W O 0.5156(2) 0.65004(15) 0.2258(4) 0.0197(11) Uani 1 1 d D . . 
H45W H 0.559(2) 0.642(2) 0.198(5) 0.030 Uiso 1 1 d D . . 
H46W H 0.515(3) 0.635(2) 0.294(3) 0.030 Uiso 1 1 d D . . 
O24W O -0.0725(3) 0.30387(15) 0.7271(4) 0.0203(11) Uani 1 1 d D . . 
H47W H -0.085(4) 0.2763(11) 0.740(5) 0.030 Uiso 1 1 d D . . 
H48W H -0.061(4) 0.3094(19) 0.659(3) 0.030 Uiso 1 1 d D . . 
O25W O 0.5542(2) 0.30606(15) 0.3027(4) 0.0179(10) Uani 1 1 d D . . 
H49W H 0.5029(14) 0.304(2) 0.301(5) 0.027 Uiso 1 1 d D . . 
H50W H 0.570(3) 0.3233(19) 0.367(4) 0.027 Uiso 1 1 d D . . 
O26W O 0.5634(3) 0.28020(15) 0.0199(4) 0.0224(11) Uani 1 1 d D . . 
H51W H 0.589(3) 0.3075(13) 0.035(5) 0.034 Uiso 1 1 d D . . 
H52W H 0.585(4) 0.2698(19) -0.043(4) 0.034 Uiso 1 1 d D . . 
 
loop_ 
 _atom_site_aniso_label 
 _atom_site_aniso_U_11 
 _atom_site_aniso_U_22 
 _atom_site_aniso_U_33 
 _atom_site_aniso_U_23 
 _atom_site_aniso_U_13 
 _atom_site_aniso_U_12 
Mg1 0.0132(11) 0.0136(11) 0.0117(11) 0.0003(9) 0.0058(9) 0.0014(9) 
Mg2 0.0142(11) 0.0192(12) 0.0116(11) 0.0029(9) 0.0038(9) -0.0048(9) 
Mg3 0.0120(10) 0.0157(11) 0.0192(11) -0.0008(10) 0.0024(9) 0.0000(9) 
O1 0.024(3) 0.008(2) 0.013(2) 0.0014(17) 0.0124(19) 0.0049(18) 
O2 0.013(2) 0.018(2) 0.022(2) 0.0000(19) 0.010(2) 0.0023(19) 
O3 0.025(3) 0.007(2) 0.020(2) -0.0025(18) 0.014(2) -0.0070(18) 
O4 0.018(2) 0.019(2) 0.019(2) -0.0040(19) 0.011(2) -0.0018(19) 
O5 0.021(2) 0.016(2) 0.015(2) 0.0030(19) 0.0100(19) 0.0065(19) 
O6 0.018(2) 0.021(3) 0.017(2) 0.007(2) 0.008(2) -0.0014(19) 
O7 0.011(2) 0.019(3) 0.021(3) -0.0020(19) 0.0056(19) -0.0058(19) 
O8 0.028(3) 0.033(3) 0.030(3) -0.009(2) 0.020(2) -0.008(2) 
O9 0.033(3) 0.022(3) 0.065(4) 0.002(3) 0.036(3) 0.005(2) 
O10 0.021(3) 0.009(2) 0.024(3) 0.0041(19) 0.008(2) -0.0048(19) 
O11 0.018(2) 0.013(2) 0.018(2) 0.0023(18) 0.0097(19) 0.0070(19) 
O12 0.019(2) 0.021(3) 0.015(2) 0.0052(19) 0.010(2) 0.0042(19) 
O13 0.011(2) 0.012(2) 0.018(2) -0.0001(18) 0.0077(19) 0.0006(18) 
O14 0.0131(17) 0.0110(17) 0.0138(17) 0.0001(14) 0.0072(15) -0.0057(14) 
O15 0.033(3) 0.015(3) 0.036(3) 0.005(2) 0.030(2) 0.002(2) 
O16 0.018(2) 0.010(2) 0.017(2) 0.0006(18) 0.0079(19) 0.0040(18) 
O17 0.0227(19) 0.024(2) 0.033(2) -0.0020(17) 0.0161(17) 0.0008(16) 
O18 0.029(3) 0.010(2) 0.017(2) 0.0027(18) 0.012(2) 0.010(2) 
O19 0.015(2) 0.007(2) 0.021(2) 0.0015(18) 0.0111(19) 0.0004(17) 
O20 0.021(2) 0.011(2) 0.017(2) -0.0008(18) 0.011(2) -0.0074(18) 
N1 0.018(3) 0.008(3) 0.041(4) -0.001(3) 0.008(3) 0.002(2) 
N2 0.030(4) 0.011(3) 0.039(4) 0.000(3) 0.013(3) 0.008(3) 
N3 0.014(3) 0.002(3) 0.021(3) 0.001(2) 0.007(2) -0.003(2) 
N4 0.013(3) 0.006(3) 0.016(3) -0.002(2) 0.010(2) 0.001(2) 
N5 0.013(3) 0.008(3) 0.010(3) -0.001(2) 0.007(2) -0.001(2) 
C39 0.012(3) 0.004(3) 0.015(3) -0.002(2) 0.005(3) -0.001(2) 
C36 0.007(3) 0.004(3) 0.013(3) 0.001(2) 0.002(2) -0.002(2) 
C33 0.014(3) 0.007(3) 0.009(3) 0.005(2) 0.005(3) 0.000(2) 
C19 0.012(3) 0.012(3) 0.014(3) -0.003(3) 0.007(3) 0.000(3) 
C37 0.009(3) 0.010(3) 0.014(3) -0.004(3) 0.003(3) 0.000(2) 
C34 0.012(3) 0.012(3) 0.009(3) 0.000(2) 0.004(3) -0.003(3) 
C22 0.009(3) 0.008(3) 0.011(3) -0.002(2) 0.005(2) -0.002(2) 
C20 0.013(3) 0.002(3) 0.014(3) 0.002(2) 0.001(3) 0.002(2) 
C21 0.010(3) 0.009(3) 0.010(3) 0.003(2) 0.003(3) -0.001(2) 
C38 0.010(3) 0.011(3) 0.009(3) -0.001(2) 0.001(3) 0.004(2) 
C35 0.007(2) 0.009(2) 0.009(2) 0.0002(17) 0.0032(18) 0.0032(17) 
C18 0.016(3) 0.009(3) 0.011(3) -0.003(2) 0.007(3) 0.000(3) 
C24 0.011(3) 0.011(3) 0.013(3) 0.002(3) 0.004(3) 0.001(3) 
C17 0.021(4) 0.011(3) 0.023(4) -0.006(3) 0.014(3) -0.005(3) 
C23 0.014(3) 0.009(3) 0.016(3) -0.002(3) 0.003(3) -0.001(3) 
C40 0.015(3) 0.009(3) 0.018(4) 0.003(3) 0.007(3) 0.005(3) 
C7 0.015(3) 0.006(3) 0.009(3) -0.005(3) 0.000(2) 0.001(3) 
C1 0.010(3) 0.008(3) 0.006(3) 0.000(2) 0.001(2) 0.001(2) 
C3 0.014(3) 0.007(3) 0.016(3) -0.001(3) 0.003(3) -0.003(2) 
C2 0.011(3) 0.009(3) 0.008(3) 0.002(2) 0.002(2) 0.000(2) 
C6 0.011(3) 0.009(3) 0.012(3) 0.000(2) -0.001(3) -0.003(2) 
C4 0.012(3) 0.005(3) 0.018(3) -0.003(3) 0.003(3) 0.000(2) 
C5 0.016(3) 0.009(3) 0.016(3) -0.001(3) 0.007(3) 0.003(3) 
C8 0.014(3) 0.016(4) 0.007(3) 0.002(3) 0.001(3) -0.005(3) 
C31 0.009(3) 0.009(3) 0.012(3) 0.000(2) 0.001(3) -0.001(2) 
C28 0.010(3) 0.007(3) 0.006(3) -0.001(2) 0.006(2) 0.000(2) 
C32 0.014(3) 0.008(3) 0.019(4) 0.000(3) 0.006(3) 0.004(3) 
C27 0.008(3) 0.015(3) 0.010(3) 0.000(3) 0.007(3) 0.001(2) 
C26 0.009(3) 0.014(3) 0.006(3) -0.001(2) 0.002(2) -0.004(2) 
C29 0.011(3) 0.011(3) 0.011(3) 0.000(2) 0.007(3) -0.002(2) 
C25 0.003(3) 0.011(3) 0.010(3) 0.006(3) 0.003(2) 0.004(2) 
C30 0.006(3) 0.013(3) 0.010(3) -0.002(2) 0.001(2) 0.001(2) 
C15 0.011(3) 0.011(3) 0.013(3) -0.005(3) 0.006(3) 0.001(2) 
C10 0.007(3) 0.014(3) 0.012(3) 0.003(3) 0.004(3) 0.001(2) 
C14 0.014(3) 0.017(4) 0.011(3) -0.006(3) 0.006(3) -0.002(3) 
C16 0.014(3) 0.022(4) 0.018(4) -0.005(3) 0.007(3) -0.005(3) 
C13 0.007(3) 0.019(4) 0.019(4) -0.009(3) 0.001(3) 0.006(3) 
C11 0.011(3) 0.017(3) 0.014(3) 0.006(3) 0.001(3) -0.001(3) 
C9 0.014(3) 0.017(4) 0.011(3) 0.000(3) 0.004(3) -0.003(3) 
C12 0.013(3) 0.014(3) 0.021(4) 0.000(3) 0.000(3) 0.004(3) 
O1W 0.023(3) 0.048(3) 0.010(2) 0.000(2) 0.004(2) 0.022(2) 
O2W 0.015(2) 0.016(2) 0.019(3) 0.0069(19) 0.006(2) 0.0024(19) 
O3W 0.013(2) 0.012(2) 0.015(2) -0.0025(18) 0.0043(19) 0.0025(18) 
O4W 0.024(3) 0.012(2) 0.016(2) -0.0007(18) -0.001(2) 0.003(2) 
O5W 0.019(3) 0.018(3) 0.029(3) 0.006(2) 0.013(2) -0.001(2) 
O6W 0.014(2) 0.028(3) 0.033(3) 0.001(2) 0.009(2) -0.003(2) 
O7W 0.016(3) 0.047(3) 0.014(2) 0.005(2) 0.000(2) -0.012(2) 
O8W 0.016(2) 0.011(2) 0.021(3) 0.0025(19) 0.002(2) -0.0010(18) 
O9W 0.025(3) 0.013(2) 0.028(3) -0.002(2) 0.003(2) -0.002(2) 
O10W 0.019(3) 0.025(3) 0.025(3) 0.003(2) -0.003(2) -0.004(2) 
O11W 0.017(3) 0.021(3) 0.023(3) -0.006(2) 0.003(2) 0.006(2) 
O12W 0.018(3) 0.020(3) 0.038(3) 0.011(2) 0.014(2) 0.006(2) 
O13W 0.021(3) 0.014(2) 0.026(3) 0.001(2) -0.005(2) 0.002(2) 
O14W 0.016(2) 0.013(2) 0.027(3) 0.003(2) -0.001(2) -0.0066(19) 
O15W 0.021(3) 0.028(3) 0.019(3) 0.008(2) 0.003(2) -0.003(2) 
O16W 0.024(3) 0.024(3) 0.026(3) -0.012(2) 0.004(2) 0.001(2) 
O17W 0.016(2) 0.010(2) 0.015(2) -0.0005(18) 0.0092(19) 0.0002(19) 
O18W 0.024(3) 0.017(3) 0.020(3) -0.002(2) 0.011(2) -0.004(2) 
O19W 0.019(3) 0.016(3) 0.020(3) 0.001(2) 0.012(2) 0.0012(19) 
O20W 0.016(2) 0.020(3) 0.016(3) 0.0017(19) 0.004(2) -0.002(2) 
O21W 0.019(3) 0.026(3) 0.018(3) -0.006(2) 0.004(2) -0.001(2) 
O22W 0.023(3) 0.017(2) 0.011(2) 0.0033(19) 0.003(2) -0.001(2) 
O23W 0.017(2) 0.018(3) 0.026(3) -0.006(2) 0.010(2) 0.001(2) 
O24W 0.020(3) 0.024(3) 0.017(3) 0.003(2) 0.006(2) 0.000(2) 
O25W 0.014(2) 0.016(2) 0.022(3) -0.002(2) -0.002(2) 0.0008(19) 
O26W 0.024(3) 0.023(3) 0.022(3) -0.004(2) 0.007(2) 0.004(2) 
 
_geom_special_details 
; 
 All esds (except the esd in the dihedral angle between two l.s. planes) 
 are estimated using the full covariance matrix.  The cell esds are taken 
 into account individually in the estimation of esds in distances, angles 
 and torsion angles; correlations between esds in cell parameters are only 
 used when they are defined by crystal symmetry.  An approximate (isotropic) 
 treatment of cell esds is used for estimating esds involving l.s. planes. 
; 
 
loop_ 
 _geom_bond_atom_site_label_1 
 _geom_bond_atom_site_label_2 
 _geom_bond_distance 
 _geom_bond_site_symmetry_2 
 _geom_bond_publ_flag 
Mg1 O1 2.036(4) . ? 
Mg1 O4W 2.044(5) . ? 
Mg1 O2W 2.050(5) . ? 
Mg1 O1W 2.057(5) . ? 
Mg1 O3W 2.073(4) . ? 
Mg1 O5W 2.086(5) . ? 
Mg2 O10W 2.045(5) . ? 
Mg2 O6W 2.054(5) . ? 
Mg2 O9W 2.056(5) . ? 
Mg2 O3 2.059(4) . ? 
Mg2 O7W 2.063(5) . ? 
Mg2 O8W 2.070(5) . ? 
Mg2 H17W 2.39(6) . ? 
Mg2 H19W 1.70(7) . ? 
Mg3 O14W 2.029(5) . ? 
Mg3 O13W 2.043(5) . ? 
Mg3 O12W 2.057(5) . ? 
Mg3 O16W 2.061(5) . ? 
Mg3 O11W 2.094(5) . ? 
Mg3 O15W 2.111(5) . ? 
Mg3 H32W 2.00(7) . ? 
O1 C1 1.256(7) . ? 
O2 C1 1.263(7) . ? 
O3 C8 1.257(7) . ? 
O4 C8 1.261(7) . ? 
O5 C9 1.270(7) . ? 
O6 C9 1.264(7) . ? 
O7 C16 1.277(7) . ? 
O8 C16 1.247(7) . ? 
O9 C17 1.248(8) . ? 
O10 C17 1.260(7) . ? 
O11 C24 1.271(7) . ? 
O12 C24 1.260(7) . ? 
O13 C25 1.241(7) . ? 
O14 C25 1.265(7) . ? 
O15 C32 1.261(7) . ? 
O16 C32 1.269(7) . ? 
O17 C40 1.241(7) . ? 
O18 C40 1.262(7) . ? 
O19 C33 1.249(7) . ? 
O20 C33 1.268(7) . ? 
N1 C4 1.463(8) . ? 
N1 H1A 0.86(2) . ? 
N1 H2A 0.87(2) . ? 
N1 H3A 0.88(2) . ? 
N2 C12 1.393(8) . ? 
N2 H4A 0.88(2) . ? 
N2 H5A 0.86(2) . ? 
N3 C20 1.462(7) . ? 
N3 H6A 0.88(2) . ? 
N3 H7A 0.88(2) . ? 
N3 H8A 0.88(2) . ? 
N4 C36 1.455(7) . ? 
N4 H9A 0.86(2) . ? 
N4 H10A 0.88(2) . ? 
N4 H11A 0.86(2) . ? 
N5 C28 1.453(7) . ? 
N5 H12A 0.89(2) . ? 
N5 H13A 0.87(2) . ? 
N5 H14A 0.86(2) . ? 
C39 C38 1.387(8) . ? 
C39 C34 1.399(8) . ? 
C39 H39 0.9500 . ? 
C36 C37 1.378(8) . ? 
C36 C35 1.383(8) . ? 
C33 C34 1.512(8) . ? 
C19 C20 1.375(8) . ? 
C19 C18 1.386(8) . ? 
C19 H19 0.9500 . ? 
C37 C38 1.400(8) . ? 
C37 H37 0.9500 . ? 
C34 C35 1.395(8) . ? 
C22 C23 1.382(8) . ? 
C22 C21 1.385(8) . ? 
C22 C24 1.510(8) . ? 
C20 C21 1.390(8) . ? 
C21 H21 0.9500 . ? 
C38 C40 1.513(8) . ? 
C35 H35 0.9500 . ? 
C18 C23 1.397(8) . ? 
C18 C17 1.525(8) . ? 
C23 H23 0.9500 . ? 
C7 C2 1.372(8) . ? 
C7 C6 1.384(8) . ? 
C7 H7 0.9500 . ? 
C1 C2 1.518(8) . ? 
C3 C2 1.383(8) . ? 
C3 C4 1.383(8) . ? 
C3 H3 0.9500 . ? 
C6 C5 1.389(8) . ? 
C6 C8 1.515(8) . ? 
C4 C5 1.378(8) . ? 
C5 H5 0.9500 . ? 
C31 C30 1.391(8) . ? 
C31 C26 1.400(8) . ? 
C31 H31 0.9500 . ? 
C28 C27 1.373(8) . ? 
C28 C29 1.387(8) . ? 
C32 C30 1.498(8) . ? 
C27 C26 1.388(8) . ? 
C27 H27 0.9500 . ? 
C26 C25 1.510(8) . ? 
C29 C30 1.387(8) . ? 
C29 H29 0.9500 . ? 
C15 C10 1.392(8) . ? 
C15 C14 1.396(8) . ? 
C15 H15 0.9500 . ? 
C10 C11 1.397(8) . ? 
C10 C9 1.498(8) . ? 
C14 C13 1.397(8) . ? 
C14 C16 1.502(9) . ? 
C13 C12 1.399(9) . ? 
C13 H13 0.9500 . ? 
C11 C12 1.392(9) . ? 
C11 H11 0.9500 . ? 
O1W H1W 0.89(2) . ? 
O1W H2W 0.89(2) . ? 
O2W H3W 0.88(2) . ? 
O2W H4W 0.89(2) . ? 
O3W H5W 0.89(2) . ? 
O3W H6W 0.89(2) . ? 
O4W H7W 0.92(2) . ? 
O4W H8W 0.92(2) . ? 
O5W H9W 0.90(2) . ? 
O5W H10W 0.89(2) . ? 
O6W H11W 0.90(2) . ? 
O6W H12W 0.89(2) . ? 
O7W H13W 0.92(2) . ? 
O7W H14W 0.91(2) . ? 
O8W H15W 0.91(2) . ? 
O8W H16W 0.92(2) . ? 
O9W H17W 0.90(2) . ? 
O9W H18W 0.90(2) . ? 
O10W H19W 0.89(2) . ? 
O10W H20W 0.93(2) . ? 
O11W H21W 0.89(2) . ? 
O11W H22W 0.90(2) . ? 
O12W H23W 0.91(2) . ? 
O12W H24W 0.90(2) . ? 
O13W H25W 0.92(2) . ? 
O13W H26W 0.91(2) . ? 
O14W H27W 0.90(2) . ? 
O14W H28W 0.90(2) . ? 
O15W H29W 0.93(2) . ? 
O15W H30W 0.93(2) . ? 
O16W H31W 0.90(2) . ? 
O16W H32W 0.90(2) . ? 
O17W H33W 0.89(2) . ? 
O17W H34W 0.90(2) . ? 
O18W H35W 0.88(2) . ? 
O18W H36W 0.89(2) . ? 
O19W H37W 0.88(2) . ? 
O19W H38W 0.87(2) . ? 
O20W H39W 0.88(2) . ? 
O20W H40W 0.90(2) . ? 
O21W H41W 0.91(2) . ? 
O21W H42W 0.90(2) . ? 
O22W H43W 0.90(2) . ? 
O22W H44W 0.90(2) . ? 
O23W H45W 0.91(2) . ? 
O23W H46W 0.92(2) . ? 
O24W H47W 0.87(2) . ? 
O24W H48W 0.87(2) . ? 
O25W H49W 0.91(2) . ? 
O25W H50W 0.92(2) . ? 
O26W H51W 0.93(2) . ? 
O26W H52W 0.92(2) . ? 
 
loop_ 
 _geom_angle_atom_site_label_1 
 _geom_angle_atom_site_label_2 
 _geom_angle_atom_site_label_3 
 _geom_angle 
 _geom_angle_site_symmetry_1 
 _geom_angle_site_symmetry_3 
 _geom_angle_publ_flag 
O1 Mg1 O4W 90.86(19) . . ? 
O1 Mg1 O2W 97.25(19) . . ? 
O4W Mg1 O2W 89.64(19) . . ? 
O1 Mg1 O1W 90.61(19) . . ? 
O4W Mg1 O1W 177.2(2) . . ? 
O2W Mg1 O1W 87.8(2) . . ? 
O1 Mg1 O3W 174.6(2) . . ? 
O4W Mg1 O3W 87.46(19) . . ? 
O2W Mg1 O3W 87.83(19) . . ? 
O1W Mg1 O3W 91.3(2) . . ? 
O1 Mg1 O5W 86.75(19) . . ? 
O4W Mg1 O5W 91.7(2) . . ? 
O2W Mg1 O5W 175.8(2) . . ? 
O1W Mg1 O5W 90.7(2) . . ? 
O3W Mg1 O5W 88.22(19) . . ? 
O10W Mg2 O6W 92.9(2) . . ? 
O10W Mg2 O9W 89.7(2) . . ? 
O6W Mg2 O9W 176.9(2) . . ? 
O10W Mg2 O3 90.79(19) . . ? 
O6W Mg2 O3 87.69(19) . . ? 
O9W Mg2 O3 94.05(19) . . ? 
O10W Mg2 O7W 176.5(2) . . ? 
O6W Mg2 O7W 90.3(2) . . ? 
O9W Mg2 O7W 87.1(2) . . ? 
O3 Mg2 O7W 90.8(2) . . ? 
O10W Mg2 O8W 87.86(19) . . ? 
O6W Mg2 O8W 90.4(2) . . ? 
O9W Mg2 O8W 87.90(19) . . ? 
O3 Mg2 O8W 177.6(2) . . ? 
O7W Mg2 O8W 90.6(2) . . ? 
O10W Mg2 H17W 98.0(13) . . ? 
O6W Mg2 H17W 158.8(9) . . ? 
O9W Mg2 H17W 21.6(10) . . ? 
O3 Mg2 H17W 74.1(12) . . ? 
O7W Mg2 H17W 79.5(14) . . ? 
O8W Mg2 H17W 108.1(12) . . ? 
O10W Mg2 H19W 25.4(9) . . ? 
O6W Mg2 H19W 77.9(17) . . ? 
O9W Mg2 H19W 105.2(17) . . ? 
O3 Mg2 H19W 70.0(15) . . ? 
O7W Mg2 H19W 157.6(10) . . ? 
O8W Mg2 H19W 108.2(15) . . ? 
H17W Mg2 H19W 105(2) . . ? 
O14W Mg3 O13W 174.9(2) . . ? 
O14W Mg3 O12W 88.6(2) . . ? 
O13W Mg3 O12W 95.5(2) . . ? 
O14W Mg3 O16W 95.2(2) . . ? 
O13W Mg3 O16W 88.2(2) . . ? 
O12W Mg3 O16W 86.0(2) . . ? 
O14W Mg3 O11W 89.5(2) . . ? 
O13W Mg3 O11W 87.4(2) . . ? 
O12W Mg3 O11W 90.6(2) . . ? 
O16W Mg3 O11W 174.1(2) . . ? 
O14W Mg3 O15W 87.27(19) . . ? 
O13W Mg3 O15W 88.9(2) . . ? 
O12W Mg3 O15W 174.6(2) . . ? 
O16W Mg3 O15W 91.0(2) . . ? 
O11W Mg3 O15W 92.7(2) . . ? 
O14W Mg3 H32W 102.6(19) . . ? 
O13W Mg3 H32W 82.1(19) . . ? 
O12W Mg3 H32W 62.2(12) . . ? 
O16W Mg3 H32W 25.6(7) . . ? 
O11W Mg3 H32W 149.4(7) . . ? 
O15W Mg3 H32W 115.6(10) . . ? 
C1 O1 Mg1 134.0(4) . . ? 
C8 O3 Mg2 130.8(4) . . ? 
C4 N1 H1A 97(5) . . ? 
C4 N1 H2A 114(5) . . ? 
H1A N1 H2A 113(7) . . ? 
C4 N1 H3A 115(5) . . ? 
H1A N1 H3A 124(7) . . ? 
H2A N1 H3A 95(6) . . ? 
C12 N2 H4A 104(5) . . ? 
C12 N2 H5A 113(5) . . ? 
H4A N2 H5A 125(7) . . ? 
C20 N3 H6A 104(4) . . ? 
C20 N3 H7A 109(4) . . ? 
H6A N3 H7A 115(6) . . ? 
C20 N3 H8A 110(4) . . ? 
H6A N3 H8A 113(6) . . ? 
H7A N3 H8A 105(6) . . ? 
C36 N4 H9A 109(4) . . ? 
C36 N4 H10A 110(4) . . ? 
H9A N4 H10A 105(6) . . ? 
C36 N4 H11A 114(4) . . ? 
H9A N4 H11A 112(6) . . ? 
H10A N4 H11A 107(6) . . ? 
C28 N5 H12A 107(4) . . ? 
C28 N5 H13A 110(4) . . ? 
H12A N5 H13A 108(6) . . ? 
C28 N5 H14A 118(4) . . ? 
H12A N5 H14A 107(6) . . ? 
H13A N5 H14A 106(6) . . ? 
C38 C39 C34 120.8(5) . . ? 
C38 C39 H39 119.6 . . ? 
C34 C39 H39 119.6 . . ? 
C37 C36 C35 121.7(5) . . ? 
C37 C36 N4 119.0(5) . . ? 
C35 C36 N4 119.3(5) . . ? 
O19 C33 O20 124.5(5) . . ? 
O19 C33 C34 118.3(5) . . ? 
O20 C33 C34 117.1(5) . . ? 
C20 C19 C18 119.5(6) . . ? 
C20 C19 H19 120.2 . . ? 
C18 C19 H19 120.2 . . ? 
C36 C37 C38 118.8(6) . . ? 
C36 C37 H37 120.6 . . ? 
C38 C37 H37 120.6 . . ? 
C35 C34 C39 118.7(5) . . ? 
C35 C34 C33 119.5(5) . . ? 
C39 C34 C33 121.8(5) . . ? 
C23 C22 C21 120.0(5) . . ? 
C23 C22 C24 122.0(5) . . ? 
C21 C22 C24 118.0(5) . . ? 
C19 C20 C21 121.0(5) . . ? 
C19 C20 N3 120.1(5) . . ? 
C21 C20 N3 118.9(5) . . ? 
C22 C21 C20 119.5(5) . . ? 
C22 C21 H21 120.2 . . ? 
C20 C21 H21 120.2 . . ? 
C39 C38 C37 120.0(5) . . ? 
C39 C38 C40 122.3(5) . . ? 
C37 C38 C40 117.7(5) . . ? 
C36 C35 C34 119.9(5) . . ? 
C36 C35 H35 120.0 . . ? 
C34 C35 H35 120.0 . . ? 
C19 C18 C23 120.0(6) . . ? 
C19 C18 C17 118.1(5) . . ? 
C23 C18 C17 121.9(5) . . ? 
O12 C24 O11 123.6(6) . . ? 
O12 C24 C22 118.3(5) . . ? 
O11 C24 C22 118.1(5) . . ? 
O9 C17 O10 125.9(6) . . ? 
O9 C17 C18 115.6(6) . . ? 
O10 C17 C18 118.6(6) . . ? 
C22 C23 C18 120.0(6) . . ? 
C22 C23 H23 120.0 . . ? 
C18 C23 H23 120.0 . . ? 
O17 C40 O18 124.6(6) . . ? 
O17 C40 C38 116.7(5) . . ? 
O18 C40 C38 118.6(5) . . ? 
C2 C7 C6 120.2(5) . . ? 
C2 C7 H7 119.9 . . ? 
C6 C7 H7 119.9 . . ? 
O1 C1 O2 124.5(5) . . ? 
O1 C1 C2 117.0(5) . . ? 
O2 C1 C2 118.5(5) . . ? 
C2 C3 C4 119.0(6) . . ? 
C2 C3 H3 120.5 . . ? 
C4 C3 H3 120.5 . . ? 
C7 C2 C3 120.3(5) . . ? 
C7 C2 C1 119.9(5) . . ? 
C3 C2 C1 119.7(5) . . ? 
C7 C6 C5 120.4(6) . . ? 
C7 C6 C8 119.4(5) . . ? 
C5 C6 C8 120.1(6) . . ? 
C5 C4 C3 121.7(5) . . ? 
C5 C4 N1 119.1(5) . . ? 
C3 C4 N1 119.2(5) . . ? 
C4 C5 C6 118.4(6) . . ? 
C4 C5 H5 120.8 . . ? 
C6 C5 H5 120.8 . . ? 
O3 C8 O4 125.4(6) . . ? 
O3 C8 C6 116.9(5) . . ? 
O4 C8 C6 117.8(5) . . ? 
C30 C31 C26 120.5(5) . . ? 
C30 C31 H31 119.8 . . ? 
C26 C31 H31 119.8 . . ? 
C27 C28 C29 120.8(5) . . ? 
C27 C28 N5 119.4(5) . . ? 
C29 C28 N5 119.8(5) . . ? 
O15 C32 O16 122.3(6) . . ? 
O15 C32 C30 119.4(5) . . ? 
O16 C32 C30 118.3(5) . . ? 
C28 C27 C26 120.3(6) . . ? 
C28 C27 H27 119.9 . . ? 
C26 C27 H27 119.9 . . ? 
C27 C26 C31 119.1(5) . . ? 
C27 C26 C25 119.2(5) . . ? 
C31 C26 C25 121.8(5) . . ? 
C28 C29 C30 119.8(5) . . ? 
C28 C29 H29 120.1 . . ? 
C30 C29 H29 120.1 . . ? 
O13 C25 O14 125.1(5) . . ? 
O13 C25 C26 117.3(5) . . ? 
O14 C25 C26 117.5(5) . . ? 
C29 C30 C31 119.5(5) . . ? 
C29 C30 C32 119.8(5) . . ? 
C31 C30 C32 120.7(5) . . ? 
C10 C15 C14 119.5(6) . . ? 
C10 C15 H15 120.2 . . ? 
C14 C15 H15 120.2 . . ? 
C15 C10 C11 120.5(6) . . ? 
C15 C10 C9 120.7(5) . . ? 
C11 C10 C9 118.7(5) . . ? 
C15 C14 C13 119.6(6) . . ? 
C15 C14 C16 121.0(6) . . ? 
C13 C14 C16 119.4(6) . . ? 
O8 C16 O7 123.5(6) . . ? 
O8 C16 C14 118.9(6) . . ? 
O7 C16 C14 117.5(6) . . ? 
C14 C13 C12 121.1(6) . . ? 
C14 C13 H13 119.5 . . ? 
C12 C13 H13 119.5 . . ? 
C12 C11 C10 120.4(6) . . ? 
C12 C11 H11 119.8 . . ? 
C10 C11 H11 119.8 . . ? 
O6 C9 O5 123.2(6) . . ? 
O6 C9 C10 117.9(5) . . ? 
O5 C9 C10 118.8(5) . . ? 
C11 C12 N2 120.2(6) . . ? 
C11 C12 C13 118.7(6) . . ? 
N2 C12 C13 121.0(6) . . ? 
Mg1 O1W H1W 121(4) . . ? 
Mg1 O1W H2W 126(4) . . ? 
H1W O1W H2W 112(4) . . ? 
Mg1 O2W H3W 122(4) . . ? 
Mg1 O2W H4W 119(4) . . ? 
H3W O2W H4W 111(4) . . ? 
Mg1 O3W H5W 124(4) . . ? 
Mg1 O3W H6W 119(4) . . ? 
H5W O3W H6W 109(3) . . ? 
Mg1 O4W H7W 142(4) . . ? 
Mg1 O4W H8W 114(3) . . ? 
H7W O4W H8W 103(3) . . ? 
Mg1 O5W H9W 129(4) . . ? 
Mg1 O5W H10W 119(4) . . ? 
H9W O5W H10W 112(4) . . ? 
Mg2 O6W H11W 128(4) . . ? 
Mg2 O6W H12W 121(4) . . ? 
H11W O6W H12W 110(4) . . ? 
Mg2 O7W H13W 123(4) . . ? 
Mg2 O7W H14W 125(4) . . ? 
H13W O7W H14W 106(3) . . ? 
Mg2 O8W H15W 116(4) . . ? 
Mg2 O8W H16W 118(4) . . ? 
H15W O8W H16W 107(3) . . ? 
Mg2 O9W H17W 101(5) . . ? 
Mg2 O9W H18W 116(5) . . ? 
H17W O9W H18W 110(4) . . ? 
Mg2 O10W H19W 55(5) . . ? 
Mg2 O10W H20W 114(4) . . ? 
H19W O10W H20W 108(3) . . ? 
Mg3 O11W H21W 138(4) . . ? 
Mg3 O11W H22W 110(4) . . ? 
H21W O11W H22W 111(4) . . ? 
Mg3 O12W H23W 121(5) . . ? 
Mg3 O12W H24W 128(5) . . ? 
H23W O12W H24W 102(7) . . ? 
Mg3 O13W H25W 121(4) . . ? 
Mg3 O13W H26W 130(4) . . ? 
H25W O13W H26W 107(3) . . ? 
Mg3 O14W H27W 130(4) . . ? 
Mg3 O14W H28W 117(4) . . ? 
H27W O14W H28W 111(4) . . ? 
Mg3 O15W H29W 101(4) . . ? 
Mg3 O15W H30W 124(4) . . ? 
H29W O15W H30W 100(3) . . ? 
Mg3 O16W H31W 129(5) . . ? 
Mg3 O16W H32W 74(5) . . ? 
H31W O16W H32W 108(3) . . ? 
H33W O17W H34W 110(3) . . ? 
H35W O18W H36W 115(4) . . ? 
H37W O19W H38W 115(4) . . ? 
H39W O20W H40W 110(4) . . ? 
H41W O21W H42W 110(4) . . ? 
H43W O22W H44W 108(3) . . ? 
H45W O23W H46W 107(3) . . ? 
H47W O24W H48W 116(4) . . ? 
H49W O25W H50W 104(3) . . ? 
H51W O26W H52W 101(3) . . ? 
 
loop_ 
 _geom_torsion_atom_site_label_1 
 _geom_torsion_atom_site_label_2 
 _geom_torsion_atom_site_label_3 
 _geom_torsion_atom_site_label_4 
 _geom_torsion 
 _geom_torsion_site_symmetry_1 
 _geom_torsion_site_symmetry_2 
 _geom_torsion_site_symmetry_3 
 _geom_torsion_site_symmetry_4 
 _geom_torsion_publ_flag 
O4W Mg1 O1 C1 -122.8(5) . . . . ? 
O2W Mg1 O1 C1 -33.0(6) . . . . ? 
O1W Mg1 O1 C1 54.8(6) . . . . ? 
O5W Mg1 O1 C1 145.6(5) . . . . ? 
O10W Mg2 O3 C8 -117.3(5) . . . . ? 
O6W Mg2 O3 C8 149.8(5) . . . . ? 
O9W Mg2 O3 C8 -27.6(5) . . . . ? 
O7W Mg2 O3 C8 59.6(5) . . . . ? 
C35 C36 C37 C38 -2.7(9) . . . . ? 
N4 C36 C37 C38 177.2(5) . . . . ? 
C38 C39 C34 C35 -2.9(9) . . . . ? 
C38 C39 C34 C33 177.4(5) . . . . ? 
O19 C33 C34 C35 -16.1(8) . . . . ? 
O20 C33 C34 C35 162.8(5) . . . . ? 
O19 C33 C34 C39 163.6(5) . . . . ? 
O20 C33 C34 C39 -17.4(8) . . . . ? 
C18 C19 C20 C21 0.3(9) . . . . ? 
C18 C19 C20 N3 -179.5(5) . . . . ? 
C23 C22 C21 C20 0.5(9) . . . . ? 
C24 C22 C21 C20 -178.7(5) . . . . ? 
C19 C20 C21 C22 -1.0(9) . . . . ? 
N3 C20 C21 C22 178.8(5) . . . . ? 
C34 C39 C38 C37 -0.2(9) . . . . ? 
C34 C39 C38 C40 179.9(5) . . . . ? 
C36 C37 C38 C39 3.0(9) . . . . ? 
C36 C37 C38 C40 -177.1(5) . . . . ? 
C37 C36 C35 C34 -0.3(9) . . . . ? 
N4 C36 C35 C34 179.8(5) . . . . ? 
C39 C34 C35 C36 3.1(9) . . . . ? 
C33 C34 C35 C36 -177.1(5) . . . . ? 
C20 C19 C18 C23 0.9(9) . . . . ? 
C20 C19 C18 C17 -178.8(5) . . . . ? 
C23 C22 C24 O12 163.2(6) . . . . ? 
C21 C22 C24 O12 -17.6(8) . . . . ? 
C23 C22 C24 O11 -18.7(8) . . . . ? 
C21 C22 C24 O11 160.5(5) . . . . ? 
C19 C18 C17 O9 12.7(9) . . . . ? 
C23 C18 C17 O9 -167.0(6) . . . . ? 
C19 C18 C17 O10 -167.9(6) . . . . ? 
C23 C18 C17 O10 12.4(9) . . . . ? 
C21 C22 C23 C18 0.8(9) . . . . ? 
C24 C22 C23 C18 179.9(5) . . . . ? 
C19 C18 C23 C22 -1.5(9) . . . . ? 
C17 C18 C23 C22 178.2(6) . . . . ? 
C39 C38 C40 O17 171.7(6) . . . . ? 
C37 C38 C40 O17 -8.2(8) . . . . ? 
C39 C38 C40 O18 -3.8(9) . . . . ? 
C37 C38 C40 O18 176.2(5) . . . . ? 
Mg1 O1 C1 O2 30.4(9) . . . . ? 
Mg1 O1 C1 C2 -148.6(4) . . . . ? 
C6 C7 C2 C3 1.3(9) . . . . ? 
C6 C7 C2 C1 178.8(5) . . . . ? 
C4 C3 C2 C7 -1.9(9) . . . . ? 
C4 C3 C2 C1 -179.4(5) . . . . ? 
O1 C1 C2 C7 9.1(8) . . . . ? 
O2 C1 C2 C7 -170.0(5) . . . . ? 
O1 C1 C2 C3 -173.4(5) . . . . ? 
O2 C1 C2 C3 7.5(8) . . . . ? 
C2 C7 C6 C5 -0.2(9) . . . . ? 
C2 C7 C6 C8 179.4(5) . . . . ? 
C2 C3 C4 C5 1.4(9) . . . . ? 
C2 C3 C4 N1 178.4(5) . . . . ? 
C3 C4 C5 C6 -0.3(9) . . . . ? 
N1 C4 C5 C6 -177.3(5) . . . . ? 
C7 C6 C5 C4 -0.3(9) . . . . ? 
C8 C6 C5 C4 -179.9(5) . . . . ? 
Mg2 O3 C8 O4 26.0(9) . . . . ? 
Mg2 O3 C8 C6 -154.1(4) . . . . ? 
C7 C6 C8 O3 14.7(8) . . . . ? 
C5 C6 C8 O3 -165.7(5) . . . . ? 
C7 C6 C8 O4 -165.4(5) . . . . ? 
C5 C6 C8 O4 14.3(8) . . . . ? 
C29 C28 C27 C26 -3.3(9) . . . . ? 
N5 C28 C27 C26 176.4(5) . . . . ? 
C28 C27 C26 C31 2.4(9) . . . . ? 
C28 C27 C26 C25 -178.0(5) . . . . ? 
C30 C31 C26 C27 0.7(8) . . . . ? 
C30 C31 C26 C25 -179.0(5) . . . . ? 
C27 C28 C29 C30 1.2(9) . . . . ? 
N5 C28 C29 C30 -178.5(5) . . . . ? 
C27 C26 C25 O13 -22.4(8) . . . . ? 
C31 C26 C25 O13 157.3(5) . . . . ? 
C27 C26 C25 O14 157.3(5) . . . . ? 
C31 C26 C25 O14 -23.0(8) . . . . ? 
C28 C29 C30 C31 1.8(9) . . . . ? 
C28 C29 C30 C32 -179.4(5) . . . . ? 
C26 C31 C30 C29 -2.8(8) . . . . ? 
C26 C31 C30 C32 178.4(5) . . . . ? 
O15 C32 C30 C29 -8.8(9) . . . . ? 
O16 C32 C30 C29 170.3(5) . . . . ? 
O15 C32 C30 C31 170.0(6) . . . . ? 
O16 C32 C30 C31 -10.9(9) . . . . ? 
C14 C15 C10 C11 1.0(9) . . . . ? 
C14 C15 C10 C9 -177.9(5) . . . . ? 
C10 C15 C14 C13 1.8(9) . . . . ? 
C10 C15 C14 C16 -178.9(5) . . . . ? 
C15 C14 C16 O8 -161.0(6) . . . . ? 
C13 C14 C16 O8 18.3(9) . . . . ? 
C15 C14 C16 O7 16.4(9) . . . . ? 
C13 C14 C16 O7 -164.3(6) . . . . ? 
C15 C14 C13 C12 -3.2(9) . . . . ? 
C16 C14 C13 C12 177.4(6) . . . . ? 
C15 C10 C11 C12 -2.4(9) . . . . ? 
C9 C10 C11 C12 176.5(5) . . . . ? 
C15 C10 C9 O6 -160.8(5) . . . . ? 
C11 C10 C9 O6 20.2(8) . . . . ? 
C15 C10 C9 O5 20.2(8) . . . . ? 
C11 C10 C9 O5 -158.7(6) . . . . ? 
C10 C11 C12 N2 -176.0(6) . . . . ? 
C10 C11 C12 C13 1.0(9) . . . . ? 
C14 C13 C12 C11 1.8(9) . . . . ? 
C14 C13 C12 N2 178.8(6) . . . . ? 
 
loop_ 
 _geom_hbond_atom_site_label_D 
 _geom_hbond_atom_site_label_H 
 _geom_hbond_atom_site_label_A 
 _geom_hbond_distance_DH 
 _geom_hbond_distance_HA 
 _geom_hbond_distance_DA 
 _geom_hbond_angle_DHA 
 _geom_hbond_site_symmetry_A 
N1 H1A O2  0.86(2) 2.30(6) 2.923(7) 129(6) 3_566 
N1 H1A O19  0.86(2) 2.45(6) 3.090(7) 131(6) 1_554 
N1 H2A O9  0.87(2) 1.84(3) 2.696(8) 168(7) . 
N1 H3A O15  0.88(2) 1.89(3) 2.765(8) 172(7) . 
N2 H4A O17  0.88(2) 2.47(6) 3.092(8) 128(6) . 
N2 H4A O15  0.88(2) 2.57(6) 3.217(8) 131(6) . 
N2 H5A O8  0.86(2) 2.20(4) 3.004(8) 155(7) 3_666 
N3 H6A O8  0.88(2) 2.05(5) 2.786(7) 141(6) . 
N3 H6A O4  0.88(2) 2.64(6) 3.162(7) 119(5) . 
N3 H7A O12  0.88(2) 1.93(3) 2.802(7) 174(6) 3_665 
N3 H8A O17  0.88(2) 1.82(3) 2.695(7) 174(6) 3_666 
N4 H9A O12  0.86(2) 2.24(5) 2.947(7) 140(6) 3_666 
N4 H9A O6  0.86(2) 2.32(6) 2.836(7) 119(5) . 
N4 H10A O4  0.88(2) 1.85(3) 2.719(7) 170(6) 1_556 
N4 H11A O13  0.86(2) 1.87(3) 2.710(7) 164(6) 3_567 
N5 H12A O6  0.89(2) 1.79(3) 2.668(7) 172(6) . 
N5 H13A O2  0.87(2) 1.87(3) 2.742(7) 179(7) . 
N5 H14A O13  0.86(2) 2.27(5) 2.846(7) 125(5) 3_567 
N5 H14A O19  0.86(2) 2.35(5) 2.991(7) 131(5) 3_567 
O1W H1W O20W  0.89(2) 1.85(2) 2.731(6) 169(6) . 
O1W H2W O5  0.89(2) 1.89(2) 2.774(6) 171(6) . 
O2W H3W O19  0.88(2) 2.01(4) 2.826(6) 153(6) 3_567 
O2W H4W O19W  0.89(2) 1.80(2) 2.682(6) 175(7) . 
O3W H5W O24W  0.89(2) 1.85(3) 2.713(6) 165(6) 2_556 
O3W H6W O17W  0.89(2) 1.82(3) 2.692(6) 165(6) . 
O4W H7W O18W  0.92(2) 1.84(3) 2.712(6) 157(6) . 
O4W H8W O16  0.92(2) 1.83(3) 2.718(6) 161(5) 3_566 
O5W H9W O22W  0.90(2) 1.92(3) 2.795(6) 162(5) . 
O5W H10W O20W  0.89(2) 1.95(2) 2.837(6) 179(7) 4_575 
O6W H11W O24W  0.90(2) 1.97(3) 2.813(6) 157(6) 3_566 
O6W H12W O21W  0.89(2) 1.95(3) 2.834(7) 172(7) 4_575 
O7W H13W O14  0.92(2) 1.89(3) 2.774(6) 161(7) 3_566 
O7W H14W O21W  0.91(2) 1.83(3) 2.717(6) 162(7) 1_554 
O8W H15W O22W  0.91(2) 1.80(3) 2.704(6) 173(5) 4_575 
O8W H16W O25W  0.92(2) 1.80(3) 2.687(6) 163(6) 2_655 
O9W H17W O4  0.90(2) 2.03(4) 2.863(6) 155(6) . 
O9W H18W O23W  0.90(2) 1.78(3) 2.669(6) 172(6) . 
O10W H19W O3  0.89(2) 2.18(5) 2.922(6) 141(6) . 
O10W H19W O6W  0.89(2) 2.38(5) 2.971(7) 124(5) . 
O10W H20W O7  0.93(2) 1.97(5) 2.701(6) 134(6) . 
O11W H21W O16  0.89(2) 1.92(3) 2.808(6) 171(6) . 
O11W H22W O18  0.90(2) 2.07(4) 2.861(6) 147(5) . 
O12W H23W O18W  0.91(2) 1.99(5) 2.793(6) 146(6) 3_566 
O12W H24W O10  0.90(2) 1.86(3) 2.750(6) 169(7) 4_566 
O13W H25W O23W  0.92(2) 1.85(3) 2.727(6) 159(5) 3_666 
O13W H26W O25W  0.91(2) 1.93(3) 2.816(6) 167(7) 4_566 
O14W H27W O17W  0.90(2) 1.92(3) 2.813(6) 174(6) 3_566 
O14W H28W O19W  0.90(2) 1.86(2) 2.738(6) 165(5) 3_566 
O15W H30W O10  0.93(2) 2.16(4) 2.920(6) 139(5) . 
O16W H31W O18  0.90(2) 1.90(4) 2.734(6) 153(6) 4_565 
O16W H32W O12W  0.90(2) 2.10(6) 2.809(7) 135(7) . 
O17W H33W O16  0.89(2) 1.88(3) 2.763(6) 170(6) 2_556 
O17W H34W O20  0.90(2) 1.83(3) 2.706(6) 164(6) 2_556 
O18W H35W O3W  0.88(2) 2.03(3) 2.889(6) 164(6) 4_575 
O18W H35W O2W  0.88(2) 2.55(6) 3.037(6) 116(4) 4_575 
O18W H36W O20  0.89(2) 1.82(3) 2.704(6) 172(6) 2_556 
O19W H37W O15  0.88(2) 1.94(2) 2.819(6) 178(6) 3_566 
O19W H38W O10  0.87(2) 1.92(3) 2.782(6) 169(6) 3_566 
O19W H38W O9  0.87(2) 2.47(5) 3.116(7) 131(5) 3_566 
O20W H39W O20  0.88(2) 2.12(4) 2.845(6) 139(5) 3_567 
O20W H39W O18W  0.88(2) 2.64(3) 3.430(6) 149(5) 4_576 
O20W H40W O14  0.90(2) 1.86(2) 2.747(6) 168(6) 3_567 
O21W H41W O5  0.91(2) 1.82(2) 2.732(6) 175(6) . 
O21W H42W O6W  0.90(2) 2.37(7) 2.834(7) 112(5) 4_576 
O22W H43W O5  0.90(2) 1.83(2) 2.709(6) 165(5) . 
O22W H44W O3  0.90(2) 2.16(3) 3.031(6) 162(5) . 
O22W H44W O6W  0.90(2) 2.41(5) 2.973(7) 121(4) . 
O23W H45W O18  0.91(2) 1.92(2) 2.804(6) 165(5) 3_666 
O23W H45W O17  0.91(2) 2.41(5) 3.080(6) 131(5) 3_666 
O23W H46W O8  0.92(2) 1.91(4) 2.765(7) 155(6) . 
O24W H47W O6W  0.87(2) 2.37(7) 2.813(6) 112(5) 3_566 
O24W H48W O5W  0.87(2) 2.21(5) 2.891(6) 135(5) 3_566 
O24W H48W O1  0.87(2) 2.47(3) 3.250(6) 150(5) 3_566 
O25W H49W O13W  0.91(2) 2.30(5) 2.816(6) 116(4) 4_565 
O25W H50W O7  0.92(2) 1.93(4) 2.759(6) 150(5) 3_666 
O26W H51W O11  0.93(2) 1.91(4) 2.707(6) 142(5) . 
O26W H51W O9W  0.93(2) 2.45(6) 2.963(7) 115(4) 3_665 
O26W H52W O8W  0.92(2) 2.04(4) 2.898(6) 155(6) 3_665 

_diffrn_measured_fraction_theta_max    0.996 
_diffrn_reflns_theta_full              25.68 
_diffrn_measured_fraction_theta_full   0.996 
_refine_diff_density_max    1.307 
_refine_diff_density_min   -0.494 
_refine_diff_density_rms    0.113 


#============================================================================#
#      Luis Cunha-Silva @ REQUIMTE & DQB FCUP  *  31/01/2020  *   END        #
#============================================================================#
