# Supplementary material for: From Discrete Complexes to Metal–Organic Layered Materials: Remarkable Hydrogen Bonding Frameworks
Source: Molecules. 2020 Mar 16;25(6):1353. doi: 10.3390/molecules25061353 (PMC7146137; doi:10.3390/molecules25061353)
Supplement: Supplementary file 1 [file molecules-25-01353-s001.zip › 2_LCS1514c.cif]

data_general

_publ_contact_author_name         'Dr Lu\'is Cunha Silva'
_publ_contact_author_address
; LAQV/REQUIMTE & Dep. of Chemistry and Biochemistry
  Faculty of Sciences
  University of Porto
  4169-007 Porto
  Portugal
;

_publ_contact_author_email        'l.cunha.silva@fc.up.pt'
_publ_contact_author_fax          '+351 220402576'
_publ_contact_author_phone        '+351 220402659'

_journal_name_full                'Molecules'

loop_
_publ_author_name
_publ_author_footnote
_publ_author_address

'Carla, Queir\\'os'  .
; LAQV/REQUIMTE & Dep. of Chemistry and Biochemistry
  Faculty of Sciences
  University of Porto
  4169-007 Porto
  Portugal
; 

'Silva, Ana M. G.'  .
; LAQV/REQUIMTE & Dep. of Chemistry and Biochemistry
  Faculty of Sciences
  University of Porto
  4169-007 Porto
  Portugal
;

'Castro, Baltazar de'  .
; LAQV/REQUIMTE & Dep. of Chemistry and Biochemistry
  Faculty of Sciences
  University of Porto
  4169-007 Porto
  Portugal
;

'Cunha-Silva, Lu\'is'  .
; LAQV/REQUIMTE & Dep. of Chemistry and Biochemistry
  Faculty of Sciences
  University of Porto
  4169-007 Porto
  Portugal
;

 
data_LCS1514c
# ========================================================================= #

_audit_creation_method            'SHELXL-2014/7 and enCIFer'
_shelx_SHELXL_version_number      '2014/7'
_audit_creation_date              '20 September 2016'

# ========================================================================= #


_chemical_name_systematic         ?
_chemical_name_common             ?
_chemical_melting_point           ?
_chemical_formula_moiety          'C40 H34 Mg2 N6 O12, H2 O'
_chemical_formula_sum             'C40 H36 Mg2 N6 O13' 
_chemical_formula_weight          857.37

loop_
 _atom_type_symbol
 _atom_type_description
 _atom_type_scat_dispersion_real
 _atom_type_scat_dispersion_imag
 _atom_type_scat_source
 'C'  'C'   0.0033   0.0016
 'International Tables Vol C Tables 4.2.6.8 and 6.1.1.4'
 'H'  'H'   0.0000   0.0000
 'International Tables Vol C Tables 4.2.6.8 and 6.1.1.4'
 'N'  'N'   0.0061   0.0033
 'International Tables Vol C Tables 4.2.6.8 and 6.1.1.4'
 'O'  'O'   0.0106   0.0060
 'International Tables Vol C Tables 4.2.6.8 and 6.1.1.4'
 'Mg'  'Mg'   0.0486   0.0363
 'International Tables Vol C Tables 4.2.6.8 and 6.1.1.4'
 
_space_group_crystal_system       monoclinic
_space_group_IT_number            14
_space_group_name_H-M_alt         'P 21/c'
_space_group_name_Hall            '-P 2ybc'
 
_shelx_space_group_comment
;
The symmetry employed for this shelxl refinement is uniquely defined
by the following loop, which should always be used as a source of
symmetry information in preference to the above space-group names.
They are only intended as comments.
;
 
loop_
 _space_group_symop_operation_xyz
 'x, y, z'
 '-x, y+1/2, -z+1/2'
 '-x, -y, -z'
 'x, -y-1/2, z-1/2'
 
_cell_length_a                    11.7432(9)
_cell_length_b                    47.433(3)
_cell_length_c                    13.9297(9)
_cell_angle_alpha                 90
_cell_angle_beta                  97.143(4)
_cell_angle_gamma                 90
_cell_volume                      7698.9(10)
_cell_formula_units_Z             8
_cell_measurement_temperature     180(2)
_cell_measurement_reflns_used     9898
_cell_measurement_theta_min       2.26
_cell_measurement_theta_max       25.27
 
_exptl_crystal_description        plate
_exptl_crystal_colour             colourless
_exptl_crystal_density_meas       ?
_exptl_crystal_density_method     ?
_exptl_crystal_density_diffrn     1.479          
_exptl_crystal_F_000              3568
_exptl_transmission_factor_min    ?
_exptl_transmission_factor_max    ?
_exptl_crystal_size_max           0.320
_exptl_crystal_size_mid           0.200
_exptl_crystal_size_min           0.030
_exptl_absorpt_coefficient_mu     0.141
_shelx_estimated_absorpt_T_min    0.956
_shelx_estimated_absorpt_T_max    0.996
_exptl_absorpt_correction_type    multi-scan
_exptl_absorpt_correction_T_min   0.967
_exptl_absorpt_correction_T_max   0.996
_exptl_absorpt_process_details        
; 
'SADABS V2012/1 (Bruker AXS Inc.)' 
;


_diffrn_ambient_temperature       180(2)
_diffrn_radiation_wavelength      0.71073
_diffrn_radiation_type            MoK\a
_diffrn_source                    'fine-focus sealed tube'
_diffrn_measurement_device_type   'Bruker X8 Kappa CCD APEX II'
_diffrn_measurement_method        '\f and \w scans'
_diffrn_detector_area_resol_mean  ?
_diffrn_reflns_number             51678
_diffrn_reflns_av_unetI/netI      0.0853
_diffrn_reflns_av_R_equivalents   0.0930
_diffrn_reflns_limit_h_min        -13
_diffrn_reflns_limit_h_max        13
_diffrn_reflns_limit_k_min        -52
_diffrn_reflns_limit_k_max        52
_diffrn_reflns_limit_l_min        -15
_diffrn_reflns_limit_l_max        14
_diffrn_reflns_theta_min          3.648
_diffrn_reflns_theta_max          23.256
_diffrn_reflns_theta_full         23.256
_diffrn_measured_fraction_theta_max   0.996
_diffrn_measured_fraction_theta_full  0.996
_diffrn_reflns_Laue_measured_fraction_max    0.996
_diffrn_reflns_Laue_measured_fraction_full   0.996
_diffrn_reflns_point_group_measured_fraction_max   0.996
_diffrn_reflns_point_group_measured_fraction_full  0.996


_reflns_number_total              10997
_reflns_number_gt                 6552
_reflns_threshold_expression      'I > 2\s(I)'
_reflns_Friedel_coverage          0.000
_reflns_Friedel_fraction_max      .
_reflns_Friedel_fraction_full     .
 
_reflns_special_details
;
 Reflections were merged by SHELXL according to the crystal
 class for the calculation of statistics and refinement.
 
 _reflns_Friedel_fraction is defined as the number of unique
 Friedel pairs measured divided by the number that would be
 possible theoretically, ignoring centric projections and
 systematic absences.
;
 
_computing_data_collection        ?
_computing_cell_refinement        ?
_computing_data_reduction         ?
_computing_structure_solution     ?
_computing_structure_refinement 'SHELXL-2014/7 (Sheldrick, 2014)'
_computing_molecular_graphics     ?
_computing_publication_material   ?


_refine_special_details           ?
_refine_ls_structure_factor_coef  Fsqd
_refine_ls_matrix_type            full
_refine_ls_weighting_scheme       calc
_refine_ls_weighting_details
'w=1/[\s^2^(Fo^2^)+(0.1684P)^2^+35.6331P] where P=(Fo^2^+2Fc^2^)/3'
_atom_sites_solution_primary      ?
_atom_sites_solution_secondary    ?
_atom_sites_solution_hydrogens    mixed
_refine_ls_hydrogen_treatment     mixed
_refine_ls_extinction_method      'SHELXL-2014/7 (Sheldrick 2014'
_refine_ls_extinction_coef        0.0033(5)
_refine_ls_extinction_expression
 'Fc^*^=kFc[1+0.001xFc^2^\l^3^/sin(2\q)]^-1/4^'
_refine_ls_number_reflns          10997
_refine_ls_number_parameters      1178
_refine_ls_number_restraints      45
_refine_ls_R_factor_all           0.1583
_refine_ls_R_factor_gt            0.1085
_refine_ls_wR_factor_ref          0.3209
_refine_ls_wR_factor_gt           0.2839
_refine_ls_goodness_of_fit_ref    1.044
_refine_ls_restrained_S_all       1.043
_refine_ls_shift/su_max           0.000
_refine_ls_shift/su_mean          0.000
 
loop_
 _atom_site_label
 _atom_site_type_symbol
 _atom_site_fract_x
 _atom_site_fract_y
 _atom_site_fract_z
 _atom_site_U_iso_or_equiv
 _atom_site_adp_type
 _atom_site_occupancy
 _atom_site_site_symmetry_order  
 _atom_site_calc_flag
 _atom_site_refinement_flags_posn
 _atom_site_refinement_flags_adp
 _atom_site_refinement_flags_occupancy
 _atom_site_disorder_assembly
 _atom_site_disorder_group
Mg1 Mg 0.87940(18) 0.21533(4) 0.49403(15) 0.0112(5) Uani 1 1 d . . . . .
Mg2 Mg 1.23610(17) 0.21440(4) 1.08809(15) 0.0106(5) Uani 1 1 d . . . . .
O1 O 0.8384(4) 0.20178(10) 0.6291(3) 0.0174(11) Uani 1 1 d . . . . .
O2 O 0.9317(4) 0.23323(10) 0.7284(3) 0.0169(11) Uani 1 1 d . . . . .
O1W O 0.9181(4) 0.22661(10) 0.3605(3) 0.0225(12) Uani 1 1 d D . . . .
O3 O 0.9999(4) 0.15865(11) 1.1138(3) 0.0264(13) Uani 1 1 d . . . . .
O2W O 0.9249(4) 0.25399(9) 0.5554(3) 0.0165(11) Uani 1 1 d D . . . .
O4 O 1.0808(4) 0.19690(10) 1.0563(3) 0.0177(11) Uani 1 1 d . . . . .
O3W O 1.1890(4) 0.25284(9) 1.0276(3) 0.0166(11) Uani 1 1 d D . . . .
O5 O 1.0381(4) 0.19861(10) 0.5249(3) 0.0171(11) Uani 1 1 d . . . . .
O4W O 1.1917(4) 0.22449(11) 1.2205(3) 0.0241(12) Uani 1 1 d D . . . .
O6 O 1.1223(5) 0.16239(11) 0.4630(3) 0.0311(14) Uani 1 1 d . . . . .
O7 O 1.2795(4) 0.20222(9) 0.9535(3) 0.0152(11) Uani 1 1 d . . . . .
O8 O 1.1938(4) 0.23426(9) 0.8517(3) 0.0160(11) Uani 1 1 d . . . . .
N1 N 0.7842(5) 0.17686(13) 0.4380(4) 0.0209(14) Uani 1 1 d . . . . .
N2 N 0.7029(5) 0.22977(14) 0.4517(4) 0.0213(15) Uani 1 1 d . . . . .
N3 N 0.6331(6) 0.14776(16) 0.8780(5) 0.047(2) Uani 1 1 d . . . . .
H33A H 0.5804 0.1491 0.8275 0.057 Uiso 1 1 calc R U . . .
H33B H 0.6196 0.1377 0.9285 0.057 Uiso 1 1 calc R U . . .
N4 N 1.4326(6) 0.13069(17) 0.7280(5) 0.0402(19) Uani 1 1 d D . . . .
N5 N 1.3409(5) 0.17640(12) 1.1330(4) 0.0183(14) Uani 1 1 d . . . . .
N6 N 1.4096(5) 0.23065(13) 1.1371(4) 0.0191(14) Uani 1 1 d . . . . .
C1 C 0.8255(8) 0.15132(17) 0.4242(5) 0.033(2) Uani 1 1 d . . . . .
H1 H 0.9062 0.1487 0.4295 0.039 Uiso 1 1 calc R U . . .
C2 C 0.7518(10) 0.1278(2) 0.4016(7) 0.054(3) Uani 1 1 d . . . . .
H2 H 0.7830 0.1098 0.3903 0.065 Uiso 1 1 calc R U . . .
C3 C 0.6368(10) 0.1314(2) 0.3964(6) 0.056(3) Uani 1 1 d . . . . .
H3 H 0.5874 0.1155 0.3850 0.067 Uiso 1 1 calc R U . . .
C4 C 0.5900(8) 0.1581(2) 0.4076(6) 0.043(2) Uani 1 1 d . . . . .
C5 C 0.6679(6) 0.18063(17) 0.4277(5) 0.0236(18) Uani 1 1 d . U . . .
C6 C 0.6252(6) 0.20896(18) 0.4326(5) 0.0255(19) Uani 1 1 d . . . . .
C7 C 0.5054(7) 0.2140(2) 0.4147(5) 0.040(2) Uani 1 1 d . . . . .
C8 C 0.4284(8) 0.1912(3) 0.3980(7) 0.056(3) Uani 1 1 d . . . . .
H8 H 0.3482 0.1947 0.3873 0.068 Uiso 1 1 calc R U . . .
C9 C 0.4681(9) 0.1643(3) 0.3970(6) 0.061(3) Uani 1 1 d . . . . .
H9 H 0.4147 0.1492 0.3892 0.073 Uiso 1 1 calc R U . . .
C10 C 0.4719(8) 0.2427(3) 0.4130(6) 0.054(3) Uani 1 1 d . . . . .
H10 H 0.3926 0.2472 0.4004 0.065 Uiso 1 1 calc R U . . .
C11 C 0.5488(8) 0.2637(2) 0.4288(6) 0.049(3) Uani 1 1 d . . . . .
H11 H 0.5251 0.2829 0.4260 0.059 Uiso 1 1 calc R U . . .
C12 C 0.6656(7) 0.25638(19) 0.4496(5) 0.031(2) Uani 1 1 d . . . . .
H12 H 0.7204 0.2711 0.4627 0.037 Uiso 1 1 calc R U . . .
C13 C 0.8768(5) 0.21075(14) 0.7122(4) 0.0118(15) Uani 1 1 d . . . . .
C14 C 0.8585(6) 0.19302(14) 0.7991(5) 0.0153(15) Uani 1 1 d . . . . .
C15 C 0.7583(6) 0.17721(16) 0.7983(5) 0.0263(19) Uani 1 1 d . . . . .
H15 H 0.7033 0.1773 0.7422 0.032 Uiso 1 1 calc R U . . .
C16 C 0.7379(6) 0.16148(19) 0.8780(6) 0.035(2) Uani 1 1 d . . . . .
C17 C 0.8193(6) 0.16150(15) 0.9606(5) 0.0222(17) Uani 1 1 d . . . . .
H17 H 0.8063 0.1507 1.0155 0.027 Uiso 1 1 calc R U . . .
C18 C 0.9208(5) 0.17767(14) 0.9622(5) 0.0113(15) Uani 1 1 d . . . . .
C19 C 0.9366(6) 0.19418(14) 0.8818(5) 0.0141(15) Uani 1 1 d . . . . .
H19 H 1.0014 0.2063 0.8840 0.017 Uiso 1 1 calc R U . . .
C20 C 1.0074(6) 0.17760(15) 1.0512(5) 0.0152(16) Uani 1 1 d . . . . .
C21 C 1.1129(6) 0.17937(14) 0.5289(5) 0.0142(16) Uani 1 1 d . . . . .
C22 C 1.1941(6) 0.17724(13) 0.6215(4) 0.0119(15) Uani 1 1 d . . . . .
C23 C 1.2800(6) 0.15635(16) 0.6313(5) 0.0243(18) Uani 1 1 d . . . . .
H23 H 1.2905 0.1448 0.5774 0.029 Uiso 1 1 calc R U . . .
C24 C 1.3491(6) 0.15236(16) 0.7178(5) 0.0258(18) Uani 1 1 d . . . . .
C25 C 1.3375(6) 0.17096(16) 0.7940(5) 0.0238(18) Uani 1 1 d . . . . .
H25 H 1.3873 0.1691 0.8529 0.029 Uiso 1 1 calc R U . . .
C26 C 1.2562(6) 0.19185(14) 0.7857(4) 0.0135(15) Uani 1 1 d . . . . .
C27 C 1.1834(5) 0.19490(14) 0.6993(5) 0.0121(15) Uani 1 1 d . . . . .
H27 H 1.1261 0.2092 0.6937 0.014 Uiso 1 1 calc R U . . .
C28 C 1.2412(5) 0.21092(14) 0.8697(4) 0.0096(14) Uani 1 1 d . . . . .
C29 C 1.3075(7) 0.14980(16) 1.1254(6) 0.032(2) Uani 1 1 d . . . . .
H29 H 1.2279 0.1456 1.1136 0.038 Uiso 1 1 calc R U . . .
C30 C 1.3891(8) 0.12715(19) 1.1347(6) 0.043(2) Uani 1 1 d . . . . .
H30 H 1.3636 0.1081 1.1297 0.052 Uiso 1 1 calc R U . . .
C31 C 1.5022(9) 0.1331(2) 1.1505(6) 0.046(3) Uani 1 1 d . . . . .
H31 H 1.5564 0.1181 1.1563 0.056 Uiso 1 1 calc R U . . .
C32 C 1.5396(7) 0.16013(19) 1.1583(5) 0.034(2) Uani 1 1 d . . . . .
C33 C 1.4559(6) 0.18163(16) 1.1474(5) 0.0215(17) Uani 1 1 d . . . . .
C34 C 1.4911(6) 0.21034(17) 1.1532(5) 0.0214(17) Uani 1 1 d . . . . .
C35 C 1.6096(6) 0.2170(2) 1.1744(5) 0.033(2) Uani 1 1 d . . . . .
C36 C 1.6919(7) 0.1949(3) 1.1859(6) 0.046(3) Uani 1 1 d . . . . .
H36 H 1.7710 0.1993 1.2017 0.055 Uiso 1 1 calc R U . . .
C37 C 1.6594(7) 0.1684(2) 1.1748(6) 0.041(2) Uani 1 1 d . . . . .
H37 H 1.7166 0.1542 1.1777 0.049 Uiso 1 1 calc R U . . .
C38 C 1.6394(8) 0.2457(2) 1.1842(6) 0.044(3) Uani 1 1 d . . . . .
H38 H 1.7173 0.2512 1.2003 0.053 Uiso 1 1 calc R U . . .
C39 C 1.5550(8) 0.2658(2) 1.1703(6) 0.046(3) Uani 1 1 d . . . . .
H39 H 1.5738 0.2852 1.1762 0.055 Uiso 1 1 calc R U . . .
C40 C 1.4409(7) 0.25729(18) 1.1474(6) 0.033(2) Uani 1 1 d . . . . .
H40 H 1.3830 0.2714 1.1389 0.039 Uiso 1 1 calc R U . . .
H1W H 0.955(7) 0.2129(10) 0.332(5) 0.049 Uiso 1 1 d D U . . .
H2W H 0.921(7) 0.2429(8) 0.329(5) 0.049 Uiso 1 1 d D U . . .
H3A H 1.478(7) 0.1438(13) 0.705(5) 0.049 Uiso 1 1 d D U . . .
H3W H 0.935(7) 0.2516(15) 0.6193(17) 0.049 Uiso 1 1 d D U . . .
H4A H 1.412(7) 0.1182(13) 0.683(4) 0.049 Uiso 1 1 d D U . . .
H4W H 0.948(7) 0.2709(9) 0.539(5) 0.049 Uiso 1 1 d D U . . .
H5W H 1.186(7) 0.2495(16) 0.9635(19) 0.049 Uiso 1 1 d D U . . .
H6W H 1.141(6) 0.2673(12) 1.035(5) 0.049 Uiso 1 1 d D U . . .
H7W H 1.199(7) 0.2394(10) 1.260(5) 0.049 Uiso 1 1 d D U . . .
H8W H 1.143(6) 0.2119(12) 1.240(5) 0.049 Uiso 1 1 d D U . . .
Mg3 Mg 0.3229(2) 0.03490(5) 0.95263(17) 0.0217(6) Uani 1 1 d . . . . .
Mg4 Mg 0.6789(2) 0.03539(5) 1.54716(17) 0.0227(6) Uani 1 1 d . . . . .
O5W O 0.3664(5) 0.02508(12) 0.8192(4) 0.0332(14) Uani 1 1 d D . . . .
O6W O 0.3727(5) -0.00354(11) 1.0154(4) 0.0280(13) Uani 1 1 d D . . . .
O7W O 0.6361(5) -0.00365(12) 1.4882(4) 0.0318(13) Uani 1 1 d D . . . .
O9 O 0.4791(4) 0.05264(11) 0.9835(4) 0.0285(13) Uani 1 1 d . . . . .
O8W O 0.6396(5) 0.02387(12) 1.6796(4) 0.0338(14) Uani 1 1 d D . . . .
O10 O 0.5577(5) 0.09107(12) 0.9289(4) 0.0341(14) Uani 1 1 d . . . . .
O11 O 0.7227(4) 0.04803(11) 1.4118(3) 0.0282(13) Uani 1 1 d . . . . .
O12 O 0.6301(5) 0.01589(11) 1.3128(4) 0.0309(13) Uani 1 1 d . . . . .
O13 O 0.2819(4) 0.04821(10) 1.0867(3) 0.0250(12) Uani 1 1 d . . . . .
O14 O 0.3675(5) 0.01651(11) 1.1897(4) 0.0288(13) Uani 1 1 d . . . . .
O15 O 0.5195(4) 0.05180(11) 1.5148(4) 0.0276(13) Uani 1 1 d . . . . .
O16 O 0.4323(5) 0.08734(12) 1.5788(4) 0.0435(16) Uani 1 1 d . . . . .
N7 N 0.2156(5) 0.07236(13) 0.9071(4) 0.0232(15) Uani 1 1 d . . . . .
N8 N 0.1501(5) 0.01785(13) 0.9083(4) 0.0231(15) Uani 1 1 d . . . . .
N9 N 0.1280(6) 0.11956(15) 1.3122(5) 0.0371(18) Uani 1 1 d D . . . .
N10 N 0.9291(6) 0.10088(15) 1.1610(5) 0.0394(19) Uani 1 1 d D . . . .
N11 N 0.8572(5) 0.02212(14) 1.5927(4) 0.0293(16) Uani 1 1 d . . . . .
N12 N 0.7722(6) 0.07432(14) 1.6021(4) 0.0287(16) Uani 1 1 d . . . . .
C41 C 0.2477(7) 0.09922(17) 0.9099(5) 0.0303(19) Uani 1 1 d . . . . .
H41 H 0.3276 0.1032 0.9180 0.036 Uiso 1 1 calc R U . . .
C42 C 0.1714(8) 0.12202(18) 0.9017(6) 0.038(2) Uani 1 1 d . . . . .
H42 H 0.1980 0.1409 0.9074 0.045 Uiso 1 1 calc R U . . .
C43 C 0.0561(8) 0.11583(19) 0.8851(6) 0.039(2) Uani 1 1 d . . . . .
H43 H 0.0018 0.1307 0.8759 0.047 Uiso 1 1 calc R U . . .
C44 C 0.0179(7) 0.08800(18) 0.8816(5) 0.0297(19) Uani 1 1 d . . . . .
C45 C 0.1005(6) 0.06685(16) 0.8924(5) 0.0237(18) Uani 1 1 d . . . . .
C46 C 0.0673(6) 0.03760(17) 0.8899(5) 0.0247(18) Uani 1 1 d . . . . .
C47 C -0.0490(6) 0.03100(19) 0.8694(5) 0.031(2) Uani 1 1 d . . . . .
C48 C -0.1338(7) 0.0534(2) 0.8566(6) 0.039(2) Uani 1 1 d . . . . .
H48 H -0.2131 0.0488 0.8443 0.047 Uiso 1 1 calc R U . . .
C49 C -0.1016(7) 0.0800(2) 0.8618(6) 0.040(2) Uani 1 1 d . . . . .
H49 H -0.1583 0.0944 0.8523 0.049 Uiso 1 1 calc R U . . .
C50 C -0.0781(8) 0.0020(2) 0.8628(6) 0.042(2) Uani 1 1 d . . . . .
H50 H -0.1558 -0.0035 0.8465 0.050 Uiso 1 1 calc R U . . .
C51 C 0.0051(7) -0.0178(2) 0.8798(6) 0.040(2) Uani 1 1 d . . . . .
H51 H -0.0138 -0.0373 0.8762 0.048 Uiso 1 1 calc R U . . .
C52 C 0.1192(7) -0.00921(17) 0.9027(6) 0.031(2) Uani 1 1 d . . . . .
H52 H 0.1770 -0.0232 0.9149 0.037 Uiso 1 1 calc R U . . .
C53 C 0.5534(6) 0.07188(16) 0.9907(5) 0.0241(18) Uani 1 1 d . . . . .
C54 C 0.6439(6) 0.07129(16) 1.0777(5) 0.0212(17) Uani 1 1 d . . . . .
C55 C 0.7423(6) 0.08696(16) 1.0788(6) 0.0258(18) Uani 1 1 d . . . . .
H55 H 0.7546 0.0977 1.0235 0.031 Uiso 1 1 calc R U . . .
C56 C 0.8259(6) 0.08719(15) 1.1617(5) 0.0227(17) Uani 1 1 d . . . . .
C57 C 0.8037(6) 0.07156(16) 1.2421(6) 0.0272(19) Uani 1 1 d . . . . .
H57 H 0.8579 0.0717 1.2987 0.033 Uiso 1 1 calc R U . . .
C58 C 0.7046(6) 0.05592(15) 1.2409(5) 0.0221(17) Uani 1 1 d . . . . .
C59 C 0.6238(6) 0.05514(15) 1.1580(5) 0.0229(17) Uani 1 1 d . . . . .
H59 H 0.5567 0.0439 1.1564 0.027 Uiso 1 1 calc R U . . .
C60 C 0.6837(6) 0.03884(16) 1.3286(5) 0.0242(18) Uani 1 1 d . . . . .
C61 C 0.3199(6) 0.04029(15) 1.1705(5) 0.0187(16) Uani 1 1 d . . . . .
C62 C 0.3052(6) 0.05919(15) 1.2554(5) 0.0201(17) Uani 1 1 d . . . . .
C63 C 0.2236(6) 0.08080(15) 1.2442(6) 0.0244(18) Uani 1 1 d . . . . .
H63 H 0.1766 0.0833 1.1842 0.029 Uiso 1 1 calc R U . . .
C64 C 0.2123(6) 0.09840(16) 1.3215(5) 0.0247(18) Uani 1 1 d . . . . .
C65 C 0.2826(6) 0.09405(16) 1.4105(5) 0.0257(18) Uani 1 1 d . . . . .
H65 H 0.2725 0.1054 1.4650 0.031 Uiso 1 1 calc R U . . .
C66 C 0.3645(6) 0.07369(15) 1.4180(5) 0.0190(17) Uani 1 1 d . . . . .
C67 C 0.3796(6) 0.05596(15) 1.3412(5) 0.0182(16) Uani 1 1 d . . . . .
H67 H 0.4385 0.0421 1.3467 0.022 Uiso 1 1 calc R U . . .
C68 C 0.4458(7) 0.07100(15) 1.5099(5) 0.0221(17) Uani 1 1 d . . . . .
C69 C 0.8979(8) -0.0041(2) 1.5974(6) 0.043(2) Uani 1 1 d . . . . .
H69 H 0.8451 -0.0191 1.5833 0.051 Uiso 1 1 calc R U . . .
C70 C 1.0139(10) -0.0108(3) 1.6218(7) 0.063(3) Uani 1 1 d . . . . .
H70 H 1.0392 -0.0298 1.6293 0.076 Uiso 1 1 calc R U . . .
C71 C 1.0896(9) 0.0114(3) 1.6344(7) 0.061(3) Uani 1 1 d . . . . .
H71 H 1.1694 0.0076 1.6473 0.073 Uiso 1 1 calc R U . . .
C72 C 1.0521(7) 0.0393(3) 1.6287(6) 0.055(3) Uani 1 1 d . . . . .
C73 C 0.9323(7) 0.0435(2) 1.6097(5) 0.036(2) Uani 1 1 d . . . . .
C74 C 0.8875(7) 0.0716(2) 1.6136(6) 0.037(2) Uani 1 1 d . . . . .
C75 C 0.9637(9) 0.0948(3) 1.6316(6) 0.053(3) Uani 1 1 d . . . . .
C76 C 1.0861(9) 0.0893(3) 1.6452(8) 0.068(4) Uani 1 1 d . . . . .
H76 H 1.1381 0.1047 1.6560 0.081 Uiso 1 1 calc R U . . .
C77 C 1.1269(9) 0.0632(3) 1.6428(7) 0.072(4) Uani 1 1 d . . . . .
H77 H 1.2076 0.0603 1.6506 0.086 Uiso 1 1 calc R U . . .
C78 C 0.9146(10) 0.1212(2) 1.6438(6) 0.051(3) Uani 1 1 d . . . . .
H78 H 0.9616 0.1373 1.6586 0.062 Uiso 1 1 calc R U . . .
C79 C 0.7985(10) 0.1234(2) 1.6342(7) 0.053(3) Uani 1 1 d . . . . .
H79 H 0.7644 0.1413 1.6416 0.064 Uiso 1 1 calc R U . . .
C80 C 0.7279(9) 0.09981(17) 1.6135(6) 0.041(2) Uani 1 1 d . . . . .
H80 H 0.6469 0.1020 1.6075 0.049 Uiso 1 1 calc R U . . .
H5A H 0.122(8) 0.1319(13) 1.358(4) 0.062 Uiso 1 1 d D U . . .
H6A H 0.117(8) 0.1271(15) 1.254(2) 0.062 Uiso 1 1 d D U . . .
H7A H 0.940(8) 0.1164(11) 1.129(5) 0.062 Uiso 1 1 d D U . . .
H8A H 0.950(8) 0.1034(17) 1.2240(18) 0.062 Uiso 1 1 d D U . . .
H9W H 0.408(7) 0.0384(11) 0.794(6) 0.062 Uiso 1 1 d D U . . .
H10W H 0.369(8) 0.0089(9) 0.785(6) 0.062 Uiso 1 1 d D U . . .
H11W H 0.382(7) -0.0030(18) 1.0803(16) 0.062 Uiso 1 1 d D U . . .
H12W H 0.317(6) -0.0153(16) 0.993(5) 0.062 Uiso 1 1 d D U . . .
H13W H 0.609(7) -0.0181(13) 1.521(5) 0.062 Uiso 1 1 d D U . . .
H14W H 0.602(7) -0.0040(17) 1.426(2) 0.062 Uiso 1 1 d D U . . .
H15W H 0.642(8) 0.0081(10) 1.717(5) 0.062 Uiso 1 1 d D U . . .
H16W H 0.600(7) 0.0372(12) 1.709(6) 0.062 Uiso 1 1 d D U . . .
O10W O 1.0455(5) 0.18678(10) 1.2874(3) 0.0244(12) Uani 1 1 d D . . . .
H19W H 1.023(7) 0.1763(12) 1.235(3) 0.037 Uiso 1 1 d D U . . .
H20W H 1.055(7) 0.1766(12) 1.341(2) 0.037 Uiso 1 1 d D U . . .
O9W O 0.5081(5) 0.06341(12) 0.7536(4) 0.0338(14) Uani 1 1 d D . . . .
H17W H 0.565(5) 0.0695(17) 0.797(4) 0.051 Uiso 1 1 d D U . . .
H18W H 0.499(7) 0.0735(15) 0.700(3) 0.051 Uiso 1 1 d D U . . .
 
loop_
 _atom_site_aniso_label
 _atom_site_aniso_U_11
 _atom_site_aniso_U_22
 _atom_site_aniso_U_33
 _atom_site_aniso_U_23
 _atom_site_aniso_U_13
 _atom_site_aniso_U_12
Mg1 0.0118(11) 0.0134(12) 0.0085(11) 0.0002(9) 0.0015(9) 0.0019(9)
Mg2 0.0097(11) 0.0131(12) 0.0094(11) -0.0009(9) 0.0025(9) -0.0021(9)
O1 0.018(3) 0.024(3) 0.010(3) -0.002(2) 0.000(2) -0.001(2)
O2 0.026(3) 0.013(3) 0.011(2) 0.000(2) 0.000(2) -0.008(2)
O1W 0.030(3) 0.020(3) 0.020(3) 0.008(2) 0.011(2) 0.012(2)
O3 0.031(3) 0.029(3) 0.016(3) 0.011(2) -0.010(2) -0.012(2)
O2W 0.025(3) 0.010(3) 0.015(3) 0.003(2) 0.004(2) -0.003(2)
O4 0.016(3) 0.018(3) 0.018(3) 0.002(2) 0.000(2) -0.008(2)
O3W 0.023(3) 0.013(3) 0.014(2) -0.002(2) 0.003(2) 0.003(2)
O5 0.017(3) 0.021(3) 0.014(3) -0.002(2) 0.000(2) 0.005(2)
O4W 0.031(3) 0.028(3) 0.016(3) -0.014(2) 0.015(2) -0.012(2)
O6 0.049(4) 0.030(3) 0.011(3) -0.011(2) -0.009(2) 0.020(3)
O7 0.018(3) 0.014(3) 0.013(3) -0.001(2) -0.001(2) 0.004(2)
O8 0.021(3) 0.016(3) 0.010(2) 0.002(2) 0.0011(19) 0.008(2)
N1 0.023(3) 0.030(4) 0.010(3) 0.005(3) 0.001(2) -0.003(3)
N2 0.016(3) 0.041(4) 0.007(3) 0.001(3) 0.004(2) 0.008(3)
N3 0.026(4) 0.066(5) 0.045(5) 0.028(4) -0.016(3) -0.027(4)
N4 0.032(4) 0.041(5) 0.043(5) -0.017(4) -0.013(3) 0.010(3)
N5 0.023(3) 0.020(4) 0.012(3) 0.001(2) -0.001(2) 0.003(3)
N6 0.024(3) 0.027(4) 0.007(3) 0.002(3) 0.004(2) -0.010(3)
C1 0.046(5) 0.028(5) 0.021(4) -0.005(4) -0.010(4) -0.008(4)
C2 0.091(9) 0.031(6) 0.038(6) -0.016(4) -0.004(5) -0.010(6)
C3 0.076(8) 0.057(7) 0.031(5) 0.003(5) -0.011(5) -0.050(6)
C4 0.047(6) 0.062(7) 0.018(5) 0.003(4) -0.004(4) -0.036(5)
C5 0.023(4) 0.043(5) 0.005(3) -0.002(3) 0.000(3) -0.012(4)
C6 0.014(4) 0.050(5) 0.013(4) -0.003(4) 0.004(3) 0.000(4)
C7 0.019(4) 0.095(8) 0.005(4) 0.003(4) 0.001(3) 0.006(5)
C8 0.016(5) 0.125(11) 0.027(5) -0.001(6) -0.001(4) -0.017(6)
C9 0.044(6) 0.119(11) 0.019(5) 0.005(6) -0.005(4) -0.052(7)
C10 0.031(5) 0.105(10) 0.027(5) 0.010(5) 0.006(4) 0.043(6)
C11 0.040(6) 0.089(8) 0.019(5) 0.005(5) 0.007(4) 0.047(6)
C12 0.026(4) 0.047(6) 0.019(4) 0.006(4) 0.002(3) 0.020(4)
C13 0.013(3) 0.017(4) 0.006(3) 0.002(3) 0.005(3) 0.007(3)
C14 0.013(4) 0.020(4) 0.013(4) 0.001(3) 0.003(3) 0.000(3)
C15 0.030(4) 0.030(5) 0.016(4) 0.008(3) -0.008(3) -0.017(4)
C16 0.011(4) 0.045(5) 0.046(5) 0.007(4) -0.006(4) -0.014(4)
C17 0.027(4) 0.024(4) 0.014(4) 0.010(3) -0.003(3) -0.008(3)
C18 0.008(3) 0.011(4) 0.015(4) 0.005(3) 0.000(3) -0.002(3)
C19 0.016(4) 0.013(4) 0.013(4) -0.002(3) 0.002(3) -0.004(3)
C20 0.021(4) 0.021(4) 0.004(3) 0.001(3) 0.002(3) 0.008(3)
C21 0.012(4) 0.018(4) 0.014(4) 0.001(3) 0.005(3) -0.001(3)
C22 0.018(4) 0.011(4) 0.006(3) 0.001(3) 0.004(3) 0.002(3)
C23 0.022(4) 0.035(5) 0.015(4) -0.009(3) -0.003(3) 0.010(4)
C24 0.027(4) 0.027(4) 0.022(4) -0.004(3) -0.003(3) 0.013(4)
C25 0.025(4) 0.032(5) 0.012(4) -0.009(3) -0.007(3) 0.009(4)
C26 0.016(4) 0.020(4) 0.004(3) 0.000(3) 0.000(3) 0.003(3)
C27 0.008(3) 0.011(4) 0.018(4) 0.001(3) 0.006(3) 0.000(3)
C28 0.005(3) 0.016(4) 0.008(3) -0.002(3) -0.001(3) -0.004(3)
C29 0.037(5) 0.028(5) 0.028(5) 0.002(4) -0.007(4) -0.005(4)
C30 0.057(6) 0.029(5) 0.042(6) -0.002(4) 0.003(5) 0.006(5)
C31 0.060(7) 0.038(6) 0.040(6) 0.002(4) 0.003(5) 0.030(5)
C32 0.033(5) 0.052(6) 0.017(4) -0.001(4) -0.001(3) 0.027(4)
C33 0.025(4) 0.032(5) 0.007(4) -0.002(3) 0.004(3) 0.010(4)
C34 0.016(4) 0.044(5) 0.003(3) 0.001(3) -0.003(3) 0.002(4)
C35 0.021(4) 0.071(7) 0.007(4) 0.007(4) 0.001(3) -0.012(4)
C36 0.018(5) 0.100(9) 0.020(5) 0.000(5) 0.000(4) 0.011(5)
C37 0.026(5) 0.077(8) 0.021(5) -0.005(5) 0.007(4) 0.026(5)
C38 0.025(5) 0.077(8) 0.031(5) -0.004(5) 0.000(4) -0.030(5)
C39 0.041(6) 0.058(7) 0.038(5) 0.001(5) 0.001(4) -0.036(5)
C40 0.038(5) 0.035(5) 0.025(5) -0.001(4) 0.008(4) -0.013(4)
Mg3 0.0195(13) 0.0272(15) 0.0178(13) -0.0010(11) 0.0004(10) -0.0013(11)
Mg4 0.0252(14) 0.0273(15) 0.0153(13) 0.0013(11) 0.0014(10) 0.0006(11)
O5W 0.036(3) 0.035(3) 0.031(3) -0.011(3) 0.012(3) -0.011(3)
O6W 0.030(3) 0.030(3) 0.025(3) -0.001(2) 0.002(2) 0.002(2)
O7W 0.037(3) 0.037(4) 0.021(3) 0.005(3) 0.004(2) -0.005(3)
O9 0.023(3) 0.035(3) 0.026(3) -0.003(2) 0.000(2) -0.013(3)
O8W 0.043(4) 0.031(3) 0.030(3) 0.006(3) 0.011(3) 0.005(3)
O10 0.038(3) 0.034(3) 0.027(3) 0.004(3) -0.009(3) -0.008(3)
O11 0.034(3) 0.034(3) 0.016(3) -0.002(2) 0.001(2) -0.007(3)
O12 0.041(3) 0.032(3) 0.021(3) -0.003(2) 0.008(2) -0.011(3)
O13 0.033(3) 0.029(3) 0.011(3) -0.001(2) -0.001(2) 0.002(2)
O14 0.039(3) 0.029(3) 0.019(3) 0.000(2) 0.006(2) 0.008(3)
O15 0.028(3) 0.030(3) 0.023(3) -0.001(2) -0.003(2) 0.009(3)
O16 0.056(4) 0.041(4) 0.030(3) -0.005(3) -0.008(3) 0.016(3)
N7 0.025(4) 0.022(4) 0.022(3) 0.003(3) 0.001(3) -0.002(3)
N8 0.020(3) 0.029(4) 0.021(3) -0.006(3) 0.000(3) -0.007(3)
N9 0.042(4) 0.042(5) 0.025(4) -0.013(3) -0.004(3) 0.014(4)
N10 0.035(4) 0.037(4) 0.043(5) 0.017(4) -0.012(4) -0.019(4)
N11 0.026(4) 0.042(4) 0.019(4) 0.004(3) -0.001(3) 0.007(3)
N12 0.034(4) 0.036(4) 0.016(3) -0.007(3) -0.002(3) -0.004(3)
C41 0.034(5) 0.038(5) 0.019(4) 0.005(4) 0.005(3) -0.005(4)
C42 0.051(6) 0.025(5) 0.040(5) 0.002(4) 0.015(4) 0.006(4)
C43 0.042(6) 0.042(6) 0.034(5) 0.003(4) 0.009(4) 0.014(4)
C44 0.029(5) 0.042(5) 0.019(4) 0.004(4) 0.005(3) 0.006(4)
C45 0.025(4) 0.032(5) 0.014(4) -0.002(3) 0.003(3) 0.002(4)
C46 0.014(4) 0.035(5) 0.024(4) 0.001(3) 0.000(3) -0.002(4)
C47 0.022(4) 0.049(6) 0.020(4) 0.005(4) 0.002(3) 0.005(4)
C48 0.015(4) 0.069(7) 0.035(5) 0.013(5) 0.003(4) 0.002(4)
C49 0.029(5) 0.061(7) 0.031(5) 0.013(4) 0.006(4) 0.020(5)
C50 0.028(5) 0.060(7) 0.035(5) -0.004(4) -0.002(4) -0.019(5)
C51 0.039(5) 0.040(5) 0.040(5) -0.004(4) 0.004(4) -0.017(5)
C52 0.041(5) 0.030(5) 0.023(4) -0.005(4) 0.006(4) -0.006(4)
C53 0.025(4) 0.025(5) 0.022(4) -0.005(4) 0.004(3) -0.005(4)
C54 0.021(4) 0.026(4) 0.016(4) -0.007(3) 0.002(3) -0.002(3)
C55 0.010(4) 0.033(5) 0.035(5) 0.002(4) 0.003(3) -0.001(3)
C56 0.025(4) 0.023(4) 0.020(4) 0.002(3) 0.004(3) -0.005(3)
C57 0.013(4) 0.036(5) 0.031(5) -0.003(4) -0.003(3) 0.002(4)
C58 0.029(4) 0.017(4) 0.019(4) -0.001(3) 0.000(3) 0.003(3)
C59 0.019(4) 0.025(4) 0.027(4) -0.003(3) 0.008(3) -0.004(3)
C60 0.020(4) 0.030(5) 0.024(5) -0.008(4) 0.007(3) -0.002(4)
C61 0.016(4) 0.023(4) 0.016(4) 0.003(3) 0.001(3) 0.000(3)
C62 0.017(4) 0.023(4) 0.020(4) 0.001(3) 0.002(3) -0.001(3)
C63 0.021(4) 0.023(4) 0.028(4) 0.000(3) -0.004(3) 0.002(3)
C64 0.013(4) 0.029(5) 0.031(5) -0.010(4) -0.003(3) 0.005(3)
C65 0.025(4) 0.032(5) 0.020(4) -0.009(3) 0.005(3) -0.002(4)
C66 0.018(4) 0.019(4) 0.020(4) 0.000(3) 0.002(3) -0.003(3)
C67 0.021(4) 0.017(4) 0.016(4) 0.001(3) 0.001(3) 0.000(3)
C68 0.040(5) 0.013(4) 0.014(4) -0.004(3) 0.006(3) 0.005(4)
C69 0.054(6) 0.054(6) 0.020(5) 0.007(4) 0.005(4) 0.024(5)
C70 0.057(7) 0.087(9) 0.047(7) 0.011(6) 0.011(5) 0.043(7)
C71 0.029(6) 0.112(11) 0.040(6) 0.002(6) -0.004(4) 0.026(7)
C72 0.021(5) 0.118(10) 0.028(5) 0.001(6) 0.002(4) 0.002(6)
C73 0.023(5) 0.073(7) 0.013(4) 0.000(4) 0.005(3) 0.002(5)
C74 0.035(5) 0.054(6) 0.023(5) -0.005(4) 0.007(4) -0.014(5)
C75 0.053(6) 0.089(9) 0.014(5) -0.006(5) -0.007(4) -0.034(6)
C76 0.042(7) 0.112(11) 0.049(7) -0.006(7) 0.009(5) -0.040(7)
C77 0.036(6) 0.153(13) 0.029(6) -0.009(7) 0.010(5) -0.032(8)
C78 0.077(8) 0.048(7) 0.030(5) -0.003(5) 0.008(5) -0.030(6)
C79 0.081(8) 0.040(6) 0.036(6) -0.008(5) -0.002(5) -0.018(6)
C80 0.071(7) 0.026(5) 0.026(5) -0.004(4) 0.006(4) 0.004(5)
O10W 0.043(3) 0.020(3) 0.012(3) 0.001(2) 0.012(3) 0.003(2)
O9W 0.046(4) 0.031(4) 0.025(3) 0.004(2) 0.010(3) -0.002(3)
 
_geom_special_details
;
 All esds (except the esd in the dihedral angle between two l.s. planes)
 are estimated using the full covariance matrix.  The cell esds are taken
 into account individually in the estimation of esds in distances, angles
 and torsion angles; correlations between esds in cell parameters are only
 used when they are defined by crystal symmetry.  An approximate (isotropic)
 treatment of cell esds is used for estimating esds involving l.s. planes.
;
 
loop_
 _geom_bond_atom_site_label_1
 _geom_bond_atom_site_label_2
 _geom_bond_distance
 _geom_bond_site_symmetry_2
 _geom_bond_publ_flag
Mg1 O5 2.022(5) . ?
Mg1 O1W 2.041(5) . ?
Mg1 O2W 2.065(5) . ?
Mg1 O1 2.101(5) . ?
Mg1 N2 2.193(6) . ?
Mg1 N1 2.230(6) . ?
Mg2 O4 2.002(5) . ?
Mg2 O4W 2.035(5) . ?
Mg2 O3W 2.055(5) . ?
Mg2 O7 2.085(5) . ?
Mg2 N6 2.205(6) . ?
Mg2 N5 2.228(6) . ?
O1 C13 1.263(8) . ?
O2 C13 1.252(8) . ?
O1W H1W 0.90(2) . ?
O1W H2W 0.89(2) . ?
O3 C20 1.263(8) . ?
O2W H3W 0.89(2) . ?
O2W H4W 0.89(2) . ?
O4 C20 1.253(8) . ?
O3W H5W 0.90(2) . ?
O3W H6W 0.90(2) . ?
O5 C21 1.264(8) . ?
O4W H7W 0.90(2) . ?
O4W H8W 0.89(2) . ?
O6 C21 1.236(8) . ?
O7 C28 1.266(8) . ?
O8 C28 1.251(8) . ?
N1 C1 1.328(10) . ?
N1 C5 1.367(9) . ?
N2 C12 1.335(10) . ?
N2 C6 1.349(10) . ?
N3 C16 1.392(10) . ?
N3 H33A 0.8800 . ?
N3 H33B 0.8800 . ?
N4 C24 1.415(10) . ?
N4 H3A 0.90(2) . ?
N4 H4A 0.87(2) . ?
N5 C29 1.321(9) . ?
N5 C33 1.364(9) . ?
N6 C40 1.319(9) . ?
N6 C34 1.357(9) . ?
C1 C2 1.423(12) . ?
C1 H1 0.9500 . ?
C2 C3 1.354(15) . ?
C2 H2 0.9500 . ?
C3 C4 1.397(14) . ?
C3 H3 0.9500 . ?
C4 C5 1.414(11) . ?
C4 C9 1.450(15) . ?
C5 C6 1.439(11) . ?
C6 C7 1.418(11) . ?
C7 C8 1.411(14) . ?
C7 C10 1.414(14) . ?
C8 C9 1.359(15) . ?
C8 H8 0.9500 . ?
C9 H9 0.9500 . ?
C10 C11 1.347(14) . ?
C10 H10 0.9500 . ?
C11 C12 1.411(11) . ?
C11 H11 0.9500 . ?
C12 H12 0.9500 . ?
C13 C14 1.511(9) . ?
C14 C19 1.381(9) . ?
C14 C15 1.394(10) . ?
C15 C16 1.382(11) . ?
C15 H15 0.9500 . ?
C16 C17 1.402(11) . ?
C17 C18 1.416(9) . ?
C17 H17 0.9500 . ?
C18 C19 1.398(9) . ?
C18 C20 1.502(9) . ?
C19 H19 0.9500 . ?
C21 C22 1.509(9) . ?
C22 C27 1.388(9) . ?
C22 C23 1.408(10) . ?
C23 C24 1.379(10) . ?
C23 H23 0.9500 . ?
C24 C25 1.400(10) . ?
C25 C26 1.371(10) . ?
C25 H25 0.9500 . ?
C26 C27 1.394(9) . ?
C26 C28 1.507(9) . ?
C27 H27 0.9500 . ?
C29 C30 1.434(12) . ?
C29 H29 0.9500 . ?
C30 C31 1.349(13) . ?
C30 H30 0.9500 . ?
C31 C32 1.357(13) . ?
C31 H31 0.9500 . ?
C32 C33 1.412(10) . ?
C32 C37 1.451(13) . ?
C33 C34 1.423(11) . ?
C34 C35 1.422(10) . ?
C35 C38 1.408(13) . ?
C35 C36 1.421(13) . ?
C36 C37 1.317(13) . ?
C36 H36 0.9500 . ?
C37 H37 0.9500 . ?
C38 C39 1.370(13) . ?
C38 H38 0.9500 . ?
C39 C40 1.398(12) . ?
C39 H39 0.9500 . ?
C40 H40 0.9500 . ?
Mg3 O9 2.015(5) . ?
Mg3 O5W 2.041(6) . ?
Mg3 O6W 2.075(6) . ?
Mg3 O13 2.084(5) . ?
Mg3 N8 2.200(6) . ?
Mg3 N7 2.225(6) . ?
Mg4 O15 2.026(6) . ?
Mg4 O8W 2.031(6) . ?
Mg4 O7W 2.063(6) . ?
Mg4 O11 2.102(5) . ?
Mg4 N11 2.202(7) . ?
Mg4 N12 2.233(7) . ?
O5W H9W 0.90(2) . ?
O5W H10W 0.91(2) . ?
O6W H11W 0.90(2) . ?
O6W H12W 0.89(2) . ?
O7W H13W 0.90(2) . ?
O7W H14W 0.91(2) . ?
O9 C53 1.258(9) . ?
O8W H15W 0.91(2) . ?
O8W H16W 0.90(2) . ?
O10 C53 1.257(9) . ?
O11 C60 1.270(9) . ?
O12 C60 1.263(9) . ?
O13 C61 1.254(8) . ?
O14 C61 1.272(8) . ?
O15 C68 1.252(9) . ?
O16 C68 1.259(9) . ?
N7 C41 1.328(10) . ?
N7 C45 1.367(9) . ?
N8 C52 1.333(10) . ?
N8 C46 1.351(9) . ?
N9 C64 1.404(10) . ?
N9 H5A 0.88(2) . ?
N9 H6A 0.88(2) . ?
N10 C56 1.376(10) . ?
N10 H7A 0.88(2) . ?
N10 H8A 0.89(2) . ?
N11 C69 1.330(10) . ?
N11 C73 1.344(11) . ?
N12 C80 1.333(10) . ?
N12 C74 1.350(11) . ?
C41 C42 1.400(11) . ?
C41 H41 0.9500 . ?
C42 C43 1.377(12) . ?
C42 H42 0.9500 . ?
C43 C44 1.393(12) . ?
C43 H43 0.9500 . ?
C44 C45 1.391(11) . ?
C44 C49 1.446(12) . ?
C45 C46 1.440(11) . ?
C46 C47 1.396(11) . ?
C47 C50 1.417(12) . ?
C47 C48 1.451(12) . ?
C48 C49 1.320(12) . ?
C48 H48 0.9500 . ?
C49 H49 0.9500 . ?
C50 C51 1.355(13) . ?
C50 H50 0.9500 . ?
C51 C52 1.399(12) . ?
C51 H51 0.9500 . ?
C52 H52 0.9500 . ?
C53 C54 1.509(10) . ?
C54 C55 1.373(10) . ?
C54 C59 1.401(10) . ?
C55 C56 1.420(10) . ?
C55 H55 0.9500 . ?
C56 C57 1.394(10) . ?
C57 C58 1.378(10) . ?
C57 H57 0.9500 . ?
C58 C59 1.401(10) . ?
C58 C60 1.511(10) . ?
C59 H59 0.9500 . ?
C61 C62 1.511(10) . ?
C62 C67 1.398(10) . ?
C62 C63 1.399(10) . ?
C63 C64 1.382(10) . ?
C63 H63 0.9500 . ?
C64 C65 1.417(10) . ?
C65 C66 1.357(10) . ?
C65 H65 0.9500 . ?
C66 C67 1.391(10) . ?
C66 C68 1.504(10) . ?
C67 H67 0.9500 . ?
C69 C70 1.399(13) . ?
C69 H69 0.9500 . ?
C70 C71 1.373(16) . ?
C70 H70 0.9500 . ?
C71 C72 1.394(15) . ?
C71 H71 0.9500 . ?
C72 C73 1.413(12) . ?
C72 C77 1.431(16) . ?
C73 C74 1.440(13) . ?
C74 C75 1.419(13) . ?
C75 C78 1.398(15) . ?
C75 C76 1.449(15) . ?
C76 C77 1.333(16) . ?
C76 H76 0.9500 . ?
C77 H77 0.9500 . ?
C78 C79 1.357(15) . ?
C78 H78 0.9500 . ?
C79 C80 1.401(13) . ?
C79 H79 0.9500 . ?
C80 H80 0.9500 . ?
O10W H19W 0.89(2) . ?
O10W H20W 0.89(2) . ?
O9W H17W 0.89(2) . ?
O9W H18W 0.89(2) . ?
 
loop_
 _geom_angle_atom_site_label_1
 _geom_angle_atom_site_label_2
 _geom_angle_atom_site_label_3
 _geom_angle
 _geom_angle_site_symmetry_1
 _geom_angle_site_symmetry_3
 _geom_angle_publ_flag
O5 Mg1 O1W 89.6(2) . . ?
O5 Mg1 O2W 94.4(2) . . ?
O1W Mg1 O2W 93.9(2) . . ?
O5 Mg1 O1 89.84(19) . . ?
O1W Mg1 O1 177.3(2) . . ?
O2W Mg1 O1 88.72(19) . . ?
O5 Mg1 N2 174.3(2) . . ?
O1W Mg1 N2 89.1(2) . . ?
O2W Mg1 N2 91.2(2) . . ?
O1 Mg1 N2 91.2(2) . . ?
O5 Mg1 N1 99.3(2) . . ?
O1W Mg1 N1 93.1(2) . . ?
O2W Mg1 N1 164.6(2) . . ?
O1 Mg1 N1 84.4(2) . . ?
N2 Mg1 N1 75.3(2) . . ?
O4 Mg2 O4W 88.2(2) . . ?
O4 Mg2 O3W 94.9(2) . . ?
O4W Mg2 O3W 94.4(2) . . ?
O4 Mg2 O7 90.23(19) . . ?
O4W Mg2 O7 177.4(2) . . ?
O3W Mg2 O7 87.73(19) . . ?
O4 Mg2 N6 173.8(2) . . ?
O4W Mg2 N6 88.2(2) . . ?
O3W Mg2 N6 90.4(2) . . ?
O7 Mg2 N6 93.2(2) . . ?
O4 Mg2 N5 100.5(2) . . ?
O4W Mg2 N5 97.5(2) . . ?
O3W Mg2 N5 160.7(2) . . ?
O7 Mg2 N5 80.8(2) . . ?
N6 Mg2 N5 74.9(2) . . ?
C13 O1 Mg1 128.5(4) . . ?
Mg1 O1W H1W 113(4) . . ?
Mg1 O1W H2W 135(5) . . ?
H1W O1W H2W 111(3) . . ?
Mg1 O2W H3W 107(4) . . ?
Mg1 O2W H4W 140(5) . . ?
H3W O2W H4W 112(3) . . ?
C20 O4 Mg2 156.4(5) . . ?
Mg2 O3W H5W 103(5) . . ?
Mg2 O3W H6W 140(5) . . ?
H5W O3W H6W 108(3) . . ?
C21 O5 Mg1 155.6(4) . . ?
Mg2 O4W H7W 137(5) . . ?
Mg2 O4W H8W 111(4) . . ?
H7W O4W H8W 111(3) . . ?
C28 O7 Mg2 129.8(4) . . ?
C1 N1 C5 118.9(7) . . ?
C1 N1 Mg1 128.4(5) . . ?
C5 N1 Mg1 112.4(5) . . ?
C12 N2 C6 118.4(6) . . ?
C12 N2 Mg1 126.7(5) . . ?
C6 N2 Mg1 114.7(5) . . ?
C16 N3 H33A 120.0 . . ?
C16 N3 H33B 120.0 . . ?
H33A N3 H33B 120.0 . . ?
C24 N4 H3A 84(6) . . ?
C24 N4 H4A 107(6) . . ?
H3A N4 H4A 109(3) . . ?
C29 N5 C33 117.6(6) . . ?
C29 N5 Mg2 127.1(5) . . ?
C33 N5 Mg2 113.3(5) . . ?
C40 N6 C34 118.7(7) . . ?
C40 N6 Mg2 127.1(5) . . ?
C34 N6 Mg2 114.1(5) . . ?
N1 C1 C2 121.6(9) . . ?
N1 C1 H1 119.2 . . ?
C2 C1 H1 119.2 . . ?
C3 C2 C1 119.3(9) . . ?
C3 C2 H2 120.4 . . ?
C1 C2 H2 120.4 . . ?
C2 C3 C4 120.7(9) . . ?
C2 C3 H3 119.6 . . ?
C4 C3 H3 119.6 . . ?
C3 C4 C5 117.0(9) . . ?
C3 C4 C9 124.8(9) . . ?
C5 C4 C9 118.2(10) . . ?
N1 C5 C4 122.4(8) . . ?
N1 C5 C6 117.8(6) . . ?
C4 C5 C6 119.7(8) . . ?
N2 C6 C7 122.9(8) . . ?
N2 C6 C5 117.5(6) . . ?
C7 C6 C5 119.6(8) . . ?
C8 C7 C10 124.3(9) . . ?
C8 C7 C6 120.0(9) . . ?
C10 C7 C6 115.7(9) . . ?
C9 C8 C7 120.6(9) . . ?
C9 C8 H8 119.7 . . ?
C7 C8 H8 119.7 . . ?
C8 C9 C4 121.7(9) . . ?
C8 C9 H9 119.2 . . ?
C4 C9 H9 119.2 . . ?
C11 C10 C7 122.1(8) . . ?
C11 C10 H10 119.0 . . ?
C7 C10 H10 119.0 . . ?
C10 C11 C12 117.7(9) . . ?
C10 C11 H11 121.1 . . ?
C12 C11 H11 121.1 . . ?
N2 C12 C11 123.1(9) . . ?
N2 C12 H12 118.4 . . ?
C11 C12 H12 118.4 . . ?
O2 C13 O1 124.7(6) . . ?
O2 C13 C14 116.8(6) . . ?
O1 C13 C14 118.5(6) . . ?
C19 C14 C15 120.0(6) . . ?
C19 C14 C13 120.0(6) . . ?
C15 C14 C13 119.8(6) . . ?
C16 C15 C14 121.0(7) . . ?
C16 C15 H15 119.5 . . ?
C14 C15 H15 119.5 . . ?
C15 C16 N3 119.6(7) . . ?
C15 C16 C17 119.3(7) . . ?
N3 C16 C17 120.8(7) . . ?
C16 C17 C18 120.0(6) . . ?
C16 C17 H17 120.0 . . ?
C18 C17 H17 120.0 . . ?
C19 C18 C17 119.1(6) . . ?
C19 C18 C20 121.2(6) . . ?
C17 C18 C20 119.7(6) . . ?
C14 C19 C18 120.3(6) . . ?
C14 C19 H19 119.8 . . ?
C18 C19 H19 119.8 . . ?
O4 C20 O3 125.9(6) . . ?
O4 C20 C18 115.8(6) . . ?
O3 C20 C18 118.2(6) . . ?
O6 C21 O5 124.3(6) . . ?
O6 C21 C22 119.0(6) . . ?
O5 C21 C22 116.6(6) . . ?
C27 C22 C23 118.9(6) . . ?
C27 C22 C21 121.2(6) . . ?
C23 C22 C21 119.9(6) . . ?
C24 C23 C22 121.2(6) . . ?
C24 C23 H23 119.4 . . ?
C22 C23 H23 119.4 . . ?
C23 C24 C25 118.3(7) . . ?
C23 C24 N4 120.8(7) . . ?
C25 C24 N4 120.9(7) . . ?
C26 C25 C24 121.6(6) . . ?
C26 C25 H25 119.2 . . ?
C24 C25 H25 119.2 . . ?
C25 C26 C27 119.6(6) . . ?
C25 C26 C28 121.0(6) . . ?
C27 C26 C28 119.3(6) . . ?
C22 C27 C26 120.4(6) . . ?
C22 C27 H27 119.8 . . ?
C26 C27 H27 119.8 . . ?
O8 C28 O7 124.9(6) . . ?
O8 C28 C26 117.9(5) . . ?
O7 C28 C26 117.3(6) . . ?
N5 C29 C30 121.4(8) . . ?
N5 C29 H29 119.3 . . ?
C30 C29 H29 119.3 . . ?
C31 C30 C29 119.5(8) . . ?
C31 C30 H30 120.3 . . ?
C29 C30 H30 120.3 . . ?
C30 C31 C32 120.8(8) . . ?
C30 C31 H31 119.6 . . ?
C32 C31 H31 119.6 . . ?
C31 C32 C33 117.4(8) . . ?
C31 C32 C37 124.5(8) . . ?
C33 C32 C37 118.0(8) . . ?
N5 C33 C32 123.2(7) . . ?
N5 C33 C34 117.3(6) . . ?
C32 C33 C34 119.5(7) . . ?
N6 C34 C35 121.9(7) . . ?
N6 C34 C33 118.4(6) . . ?
C35 C34 C33 119.7(7) . . ?
C38 C35 C36 123.1(8) . . ?
C38 C35 C34 117.4(8) . . ?
C36 C35 C34 119.5(8) . . ?
C37 C36 C35 120.5(8) . . ?
C37 C36 H36 119.7 . . ?
C35 C36 H36 119.7 . . ?
C36 C37 C32 122.6(8) . . ?
C36 C37 H37 118.7 . . ?
C32 C37 H37 118.7 . . ?
C39 C38 C35 119.4(8) . . ?
C39 C38 H38 120.3 . . ?
C35 C38 H38 120.3 . . ?
C38 C39 C40 119.2(9) . . ?
C38 C39 H39 120.4 . . ?
C40 C39 H39 120.4 . . ?
N6 C40 C39 123.2(9) . . ?
N6 C40 H40 118.4 . . ?
C39 C40 H40 118.4 . . ?
O9 Mg3 O5W 88.0(2) . . ?
O9 Mg3 O6W 94.3(2) . . ?
O5W Mg3 O6W 95.4(2) . . ?
O9 Mg3 O13 89.3(2) . . ?
O5W Mg3 O13 175.5(3) . . ?
O6W Mg3 O13 88.4(2) . . ?
O9 Mg3 N8 175.2(3) . . ?
O5W Mg3 N8 89.2(2) . . ?
O6W Mg3 N8 89.8(2) . . ?
O13 Mg3 N8 93.2(2) . . ?
O9 Mg3 N7 101.3(2) . . ?
O5W Mg3 N7 96.9(2) . . ?
O6W Mg3 N7 160.4(2) . . ?
O13 Mg3 N7 80.1(2) . . ?
N8 Mg3 N7 75.1(2) . . ?
O15 Mg4 O8W 89.9(2) . . ?
O15 Mg4 O7W 94.8(2) . . ?
O8W Mg4 O7W 92.8(2) . . ?
O15 Mg4 O11 90.8(2) . . ?
O8W Mg4 O11 178.6(3) . . ?
O7W Mg4 O11 88.5(2) . . ?
O15 Mg4 N11 173.2(3) . . ?
O8W Mg4 N11 88.7(2) . . ?
O7W Mg4 N11 92.0(3) . . ?
O11 Mg4 N11 90.6(2) . . ?
O15 Mg4 N12 99.1(2) . . ?
O8W Mg4 N12 93.9(2) . . ?
O7W Mg4 N12 164.6(3) . . ?
O11 Mg4 N12 84.7(2) . . ?
N11 Mg4 N12 74.3(3) . . ?
Mg3 O5W H9W 114(5) . . ?
Mg3 O5W H10W 134(5) . . ?
H9W O5W H10W 109(3) . . ?
Mg3 O6W H11W 113(6) . . ?
Mg3 O6W H12W 104(6) . . ?
H11W O6W H12W 112(3) . . ?
Mg4 O7W H13W 125(5) . . ?
Mg4 O7W H14W 117(5) . . ?
H13W O7W H14W 109(3) . . ?
C53 O9 Mg3 157.5(5) . . ?
Mg4 O8W H15W 138(5) . . ?
Mg4 O8W H16W 114(5) . . ?
H15W O8W H16W 107(3) . . ?
C60 O11 Mg4 128.3(5) . . ?
C61 O13 Mg3 130.4(5) . . ?
C68 O15 Mg4 154.8(5) . . ?
C41 N7 C45 117.4(7) . . ?
C41 N7 Mg3 127.5(5) . . ?
C45 N7 Mg3 113.9(5) . . ?
C52 N8 C46 118.2(7) . . ?
C52 N8 Mg3 127.2(5) . . ?
C46 N8 Mg3 114.5(5) . . ?
C64 N9 H5A 122(6) . . ?
C64 N9 H6A 113(6) . . ?
H5A N9 H6A 113(4) . . ?
C56 N10 H7A 126(6) . . ?
C56 N10 H8A 101(6) . . ?
H7A N10 H8A 110(3) . . ?
C69 N11 C73 118.1(8) . . ?
C69 N11 Mg4 127.2(6) . . ?
C73 N11 Mg4 114.5(5) . . ?
C80 N12 C74 118.1(8) . . ?
C80 N12 Mg4 127.5(6) . . ?
C74 N12 Mg4 113.9(6) . . ?
N7 C41 C42 124.2(8) . . ?
N7 C41 H41 117.9 . . ?
C42 C41 H41 117.9 . . ?
C43 C42 C41 117.1(8) . . ?
C43 C42 H42 121.5 . . ?
C41 C42 H42 121.5 . . ?
C42 C43 C44 120.9(8) . . ?
C42 C43 H43 119.5 . . ?
C44 C43 H43 119.5 . . ?
C45 C44 C43 117.6(7) . . ?
C45 C44 C49 118.6(8) . . ?
C43 C44 C49 123.7(8) . . ?
N7 C45 C44 122.8(7) . . ?
N7 C45 C46 116.6(7) . . ?
C44 C45 C46 120.6(7) . . ?
N8 C46 C47 123.1(7) . . ?
N8 C46 C45 118.5(6) . . ?
C47 C46 C45 118.4(7) . . ?
C46 C47 C50 116.9(7) . . ?
C46 C47 C48 120.0(8) . . ?
C50 C47 C48 123.0(8) . . ?
C49 C48 C47 120.4(8) . . ?
C49 C48 H48 119.8 . . ?
C47 C48 H48 119.8 . . ?
C48 C49 C44 121.8(8) . . ?
C48 C49 H49 119.1 . . ?
C44 C49 H49 119.1 . . ?
C51 C50 C47 119.9(8) . . ?
C51 C50 H50 120.0 . . ?
C47 C50 H50 120.0 . . ?
C50 C51 C52 119.2(8) . . ?
C50 C51 H51 120.4 . . ?
C52 C51 H51 120.4 . . ?
N8 C52 C51 122.7(8) . . ?
N8 C52 H52 118.7 . . ?
C51 C52 H52 118.7 . . ?
O10 C53 O9 123.9(7) . . ?
O10 C53 C54 118.6(7) . . ?
O9 C53 C54 117.5(7) . . ?
C55 C54 C59 120.8(7) . . ?
C55 C54 C53 120.4(7) . . ?
C59 C54 C53 118.7(7) . . ?
C54 C55 C56 120.6(7) . . ?
C54 C55 H55 119.7 . . ?
C56 C55 H55 119.7 . . ?
N10 C56 C57 120.6(7) . . ?
N10 C56 C55 121.2(7) . . ?
C57 C56 C55 118.0(7) . . ?
C58 C57 C56 121.3(7) . . ?
C58 C57 H57 119.4 . . ?
C56 C57 H57 119.4 . . ?
C57 C58 C59 120.5(7) . . ?
C57 C58 C60 120.1(7) . . ?
C59 C58 C60 119.4(7) . . ?
C54 C59 C58 118.7(7) . . ?
C54 C59 H59 120.7 . . ?
C58 C59 H59 120.7 . . ?
O12 C60 O11 124.8(7) . . ?
O12 C60 C58 116.7(6) . . ?
O11 C60 C58 118.5(7) . . ?
O13 C61 O14 123.9(6) . . ?
O13 C61 C62 119.2(6) . . ?
O14 C61 C62 116.8(6) . . ?
C67 C62 C63 121.5(7) . . ?
C67 C62 C61 118.9(6) . . ?
C63 C62 C61 119.4(6) . . ?
C64 C63 C62 119.1(7) . . ?
C64 C63 H63 120.4 . . ?
C62 C63 H63 120.4 . . ?
C63 C64 N9 119.7(7) . . ?
C63 C64 C65 119.5(7) . . ?
N9 C64 C65 120.8(6) . . ?
C66 C65 C64 120.1(7) . . ?
C66 C65 H65 120.0 . . ?
C64 C65 H65 120.0 . . ?
C65 C66 C67 121.9(7) . . ?
C65 C66 C68 119.7(6) . . ?
C67 C66 C68 118.4(6) . . ?
C66 C67 C62 117.8(7) . . ?
C66 C67 H67 121.1 . . ?
C62 C67 H67 121.1 . . ?
O15 C68 O16 123.9(7) . . ?
O15 C68 C66 118.0(6) . . ?
O16 C68 C66 118.0(7) . . ?
N11 C69 C70 123.8(10) . . ?
N11 C69 H69 118.1 . . ?
C70 C69 H69 118.1 . . ?
C71 C70 C69 116.9(10) . . ?
C71 C70 H70 121.6 . . ?
C69 C70 H70 121.6 . . ?
C70 C71 C72 121.7(9) . . ?
C70 C71 H71 119.2 . . ?
C72 C71 H71 119.2 . . ?
C71 C72 C73 116.3(10) . . ?
C71 C72 C77 124.0(10) . . ?
C73 C72 C77 119.7(11) . . ?
N11 C73 C72 122.9(9) . . ?
N11 C73 C74 118.1(7) . . ?
C72 C73 C74 118.9(9) . . ?
N12 C74 C75 123.4(9) . . ?
N12 C74 C73 116.7(8) . . ?
C75 C74 C73 119.9(9) . . ?
C78 C75 C74 117.0(9) . . ?
C78 C75 C76 124.2(10) . . ?
C74 C75 C76 118.6(11) . . ?
C77 C76 C75 121.1(11) . . ?
C77 C76 H76 119.4 . . ?
C75 C76 H76 119.4 . . ?
C76 C77 C72 121.6(11) . . ?
C76 C77 H77 119.2 . . ?
C72 C77 H77 119.2 . . ?
C79 C78 C75 118.8(9) . . ?
C79 C78 H78 120.6 . . ?
C75 C78 H78 120.6 . . ?
C78 C79 C80 121.4(10) . . ?
C78 C79 H79 119.3 . . ?
C80 C79 H79 119.3 . . ?
N12 C80 C79 121.2(9) . . ?
N12 C80 H80 119.4 . . ?
C79 C80 H80 119.4 . . ?
H19W O10W H20W 112(3) . . ?
H17W O9W H18W 114(3) . . ?
 
loop_
 _geom_torsion_atom_site_label_1
 _geom_torsion_atom_site_label_2
 _geom_torsion_atom_site_label_3
 _geom_torsion_atom_site_label_4
 _geom_torsion
 _geom_torsion_site_symmetry_1
 _geom_torsion_site_symmetry_2
 _geom_torsion_site_symmetry_3
 _geom_torsion_site_symmetry_4
 _geom_torsion_publ_flag
C5 N1 C1 C2 -1.8(11) . . . . ?
Mg1 N1 C1 C2 170.4(6) . . . . ?
N1 C1 C2 C3 -1.6(13) . . . . ?
C1 C2 C3 C4 3.6(14) . . . . ?
C2 C3 C4 C5 -2.2(13) . . . . ?
C2 C3 C4 C9 175.8(9) . . . . ?
C1 N1 C5 C4 3.3(10) . . . . ?
Mg1 N1 C5 C4 -170.1(5) . . . . ?
C1 N1 C5 C6 -173.3(6) . . . . ?
Mg1 N1 C5 C6 13.3(7) . . . . ?
C3 C4 C5 N1 -1.3(11) . . . . ?
C9 C4 C5 N1 -179.4(7) . . . . ?
C3 C4 C5 C6 175.2(7) . . . . ?
C9 C4 C5 C6 -2.9(11) . . . . ?
C12 N2 C6 C7 -3.0(10) . . . . ?
Mg1 N2 C6 C7 172.8(5) . . . . ?
C12 N2 C6 C5 175.2(6) . . . . ?
Mg1 N2 C6 C5 -9.0(8) . . . . ?
N1 C5 C6 N2 -3.2(9) . . . . ?
C4 C5 C6 N2 -179.8(6) . . . . ?
N1 C5 C6 C7 175.1(6) . . . . ?
C4 C5 C6 C7 -1.6(10) . . . . ?
N2 C6 C7 C8 -178.1(7) . . . . ?
C5 C6 C7 C8 3.8(11) . . . . ?
N2 C6 C7 C10 3.2(11) . . . . ?
C5 C6 C7 C10 -174.9(7) . . . . ?
C10 C7 C8 C9 177.3(8) . . . . ?
C6 C7 C8 C9 -1.3(13) . . . . ?
C7 C8 C9 C4 -3.5(14) . . . . ?
C3 C4 C9 C8 -172.4(9) . . . . ?
C5 C4 C9 C8 5.5(13) . . . . ?
C8 C7 C10 C11 -179.6(8) . . . . ?
C6 C7 C10 C11 -0.9(12) . . . . ?
C7 C10 C11 C12 -1.4(13) . . . . ?
C6 N2 C12 C11 0.4(10) . . . . ?
Mg1 N2 C12 C11 -174.8(5) . . . . ?
C10 C11 C12 N2 1.8(12) . . . . ?
Mg1 O1 C13 O2 14.0(9) . . . . ?
Mg1 O1 C13 C14 -164.3(4) . . . . ?
O2 C13 C14 C19 -27.8(9) . . . . ?
O1 C13 C14 C19 150.7(6) . . . . ?
O2 C13 C14 C15 147.2(7) . . . . ?
O1 C13 C14 C15 -34.3(9) . . . . ?
C19 C14 C15 C16 -3.1(12) . . . . ?
C13 C14 C15 C16 -178.0(7) . . . . ?
C14 C15 C16 N3 174.8(8) . . . . ?
C14 C15 C16 C17 0.1(13) . . . . ?
C15 C16 C17 C18 0.4(12) . . . . ?
N3 C16 C17 C18 -174.2(8) . . . . ?
C16 C17 C18 C19 2.0(11) . . . . ?
C16 C17 C18 C20 179.9(7) . . . . ?
C15 C14 C19 C18 5.5(10) . . . . ?
C13 C14 C19 C18 -179.5(6) . . . . ?
C17 C18 C19 C14 -5.0(10) . . . . ?
C20 C18 C19 C14 177.1(6) . . . . ?
Mg2 O4 C20 O3 38.0(15) . . . . ?
Mg2 O4 C20 C18 -142.7(9) . . . . ?
C19 C18 C20 O4 13.6(9) . . . . ?
C17 C18 C20 O4 -164.3(6) . . . . ?
C19 C18 C20 O3 -167.1(6) . . . . ?
C17 C18 C20 O3 15.1(9) . . . . ?
Mg1 O5 C21 O6 42.6(15) . . . . ?
Mg1 O5 C21 C22 -136.5(9) . . . . ?
O6 C21 C22 C27 -176.7(6) . . . . ?
O5 C21 C22 C27 2.5(9) . . . . ?
O6 C21 C22 C23 0.9(10) . . . . ?
O5 C21 C22 C23 -179.9(6) . . . . ?
C27 C22 C23 C24 3.2(11) . . . . ?
C21 C22 C23 C24 -174.5(7) . . . . ?
C22 C23 C24 C25 -4.6(12) . . . . ?
C22 C23 C24 N4 177.9(7) . . . . ?
C23 C24 C25 C26 3.2(12) . . . . ?
N4 C24 C25 C26 -179.2(7) . . . . ?
C24 C25 C26 C27 -0.5(11) . . . . ?
C24 C25 C26 C28 177.3(7) . . . . ?
C23 C22 C27 C26 -0.3(10) . . . . ?
C21 C22 C27 C26 177.3(6) . . . . ?
C25 C26 C27 C22 -1.0(10) . . . . ?
C28 C26 C27 C22 -178.8(6) . . . . ?
Mg2 O7 C28 O8 22.4(9) . . . . ?
Mg2 O7 C28 C26 -158.8(4) . . . . ?
C25 C26 C28 O8 158.3(6) . . . . ?
C27 C26 C28 O8 -23.9(9) . . . . ?
C25 C26 C28 O7 -20.6(9) . . . . ?
C27 C26 C28 O7 157.2(6) . . . . ?
C33 N5 C29 C30 1.7(11) . . . . ?
Mg2 N5 C29 C30 164.6(6) . . . . ?
N5 C29 C30 C31 -0.6(13) . . . . ?
C29 C30 C31 C32 0.4(14) . . . . ?
C30 C31 C32 C33 -1.2(13) . . . . ?
C30 C31 C32 C37 -179.7(8) . . . . ?
C29 N5 C33 C32 -2.6(10) . . . . ?
Mg2 N5 C33 C32 -167.8(5) . . . . ?
C29 N5 C33 C34 178.6(6) . . . . ?
Mg2 N5 C33 C34 13.4(7) . . . . ?
C31 C32 C33 N5 2.3(11) . . . . ?
C37 C32 C33 N5 -179.0(7) . . . . ?
C31 C32 C33 C34 -178.9(7) . . . . ?
C37 C32 C33 C34 -0.3(10) . . . . ?
C40 N6 C34 C35 -4.4(10) . . . . ?
Mg2 N6 C34 C35 172.7(5) . . . . ?
C40 N6 C34 C33 176.4(6) . . . . ?
Mg2 N6 C34 C33 -6.5(7) . . . . ?
N5 C33 C34 N6 -4.8(9) . . . . ?
C32 C33 C34 N6 176.3(6) . . . . ?
N5 C33 C34 C35 175.9(6) . . . . ?
C32 C33 C34 C35 -2.9(10) . . . . ?
N6 C34 C35 C38 3.9(10) . . . . ?
C33 C34 C35 C38 -176.9(7) . . . . ?
N6 C34 C35 C36 -176.8(6) . . . . ?
C33 C34 C35 C36 2.4(10) . . . . ?
C38 C35 C36 C37 -179.2(8) . . . . ?
C34 C35 C36 C37 1.6(11) . . . . ?
C35 C36 C37 C32 -5.0(13) . . . . ?
C31 C32 C37 C36 -177.1(8) . . . . ?
C33 C32 C37 C36 4.4(12) . . . . ?
C36 C35 C38 C39 178.8(8) . . . . ?
C34 C35 C38 C39 -1.9(11) . . . . ?
C35 C38 C39 C40 0.5(13) . . . . ?
C34 N6 C40 C39 2.8(11) . . . . ?
Mg2 N6 C40 C39 -173.9(6) . . . . ?
C38 C39 C40 N6 -0.9(13) . . . . ?
C45 N7 C41 C42 2.0(11) . . . . ?
Mg3 N7 C41 C42 -164.5(6) . . . . ?
N7 C41 C42 C43 -3.2(12) . . . . ?
C41 C42 C43 C44 3.1(12) . . . . ?
C42 C43 C44 C45 -2.0(12) . . . . ?
C42 C43 C44 C49 -178.2(8) . . . . ?
C41 N7 C45 C44 -0.8(10) . . . . ?
Mg3 N7 C45 C44 167.6(6) . . . . ?
C41 N7 C45 C46 -179.8(6) . . . . ?
Mg3 N7 C45 C46 -11.4(8) . . . . ?
C43 C44 C45 N7 0.8(11) . . . . ?
C49 C44 C45 N7 177.1(7) . . . . ?
C43 C44 C45 C46 179.7(7) . . . . ?
C49 C44 C45 C46 -3.9(11) . . . . ?
C52 N8 C46 C47 2.6(11) . . . . ?
Mg3 N8 C46 C47 -174.1(6) . . . . ?
C52 N8 C46 C45 -177.8(7) . . . . ?
Mg3 N8 C46 C45 5.5(8) . . . . ?
N7 C45 C46 N8 4.1(10) . . . . ?
C44 C45 C46 N8 -174.9(7) . . . . ?
N7 C45 C46 C47 -176.3(7) . . . . ?
C44 C45 C46 C47 4.7(11) . . . . ?
N8 C46 C47 C50 -3.5(12) . . . . ?
C45 C46 C47 C50 176.9(7) . . . . ?
N8 C46 C47 C48 176.0(7) . . . . ?
C45 C46 C47 C48 -3.5(11) . . . . ?
C46 C47 C48 C49 1.7(12) . . . . ?
C50 C47 C48 C49 -178.8(8) . . . . ?
C47 C48 C49 C44 -0.9(13) . . . . ?
C45 C44 C49 C48 2.0(12) . . . . ?
C43 C44 C49 C48 178.1(8) . . . . ?
C46 C47 C50 C51 2.4(12) . . . . ?
C48 C47 C50 C51 -177.1(8) . . . . ?
C47 C50 C51 C52 -0.6(13) . . . . ?
C46 N8 C52 C51 -0.6(11) . . . . ?
Mg3 N8 C52 C51 175.6(6) . . . . ?
C50 C51 C52 N8 -0.3(13) . . . . ?
Mg3 O9 C53 O10 -39.3(18) . . . . ?
Mg3 O9 C53 C54 142.1(10) . . . . ?
O10 C53 C54 C55 -14.8(11) . . . . ?
O9 C53 C54 C55 163.9(7) . . . . ?
O10 C53 C54 C59 163.3(7) . . . . ?
O9 C53 C54 C59 -18.0(10) . . . . ?
C59 C54 C55 C56 -0.2(11) . . . . ?
C53 C54 C55 C56 177.9(7) . . . . ?
C54 C55 C56 N10 174.5(7) . . . . ?
C54 C55 C56 C57 -1.3(11) . . . . ?
N10 C56 C57 C58 -174.7(7) . . . . ?
C55 C56 C57 C58 1.1(11) . . . . ?
C56 C57 C58 C59 0.6(11) . . . . ?
C56 C57 C58 C60 179.1(7) . . . . ?
C55 C54 C59 C58 1.9(11) . . . . ?
C53 C54 C59 C58 -176.2(6) . . . . ?
C57 C58 C59 C54 -2.1(11) . . . . ?
C60 C58 C59 C54 179.4(7) . . . . ?
Mg4 O11 C60 O12 -17.2(11) . . . . ?
Mg4 O11 C60 C58 164.5(5) . . . . ?
C57 C58 C60 O12 -146.2(7) . . . . ?
C59 C58 C60 O12 32.3(10) . . . . ?
C57 C58 C60 O11 32.2(10) . . . . ?
C59 C58 C60 O11 -149.3(7) . . . . ?
Mg3 O13 C61 O14 -22.1(11) . . . . ?
Mg3 O13 C61 C62 160.5(5) . . . . ?
O13 C61 C62 C67 -157.2(7) . . . . ?
O14 C61 C62 C67 25.3(10) . . . . ?
O13 C61 C62 C63 18.0(10) . . . . ?
O14 C61 C62 C63 -159.6(7) . . . . ?
C67 C62 C63 C64 -3.5(11) . . . . ?
C61 C62 C63 C64 -178.6(7) . . . . ?
C62 C63 C64 N9 -177.8(7) . . . . ?
C62 C63 C64 C65 -0.5(11) . . . . ?
C63 C64 C65 C66 3.4(12) . . . . ?
N9 C64 C65 C66 -179.3(7) . . . . ?
C64 C65 C66 C67 -2.3(11) . . . . ?
C64 C65 C66 C68 174.4(7) . . . . ?
C65 C66 C67 C62 -1.7(11) . . . . ?
C68 C66 C67 C62 -178.4(6) . . . . ?
C63 C62 C67 C66 4.6(11) . . . . ?
C61 C62 C67 C66 179.7(6) . . . . ?
Mg4 O15 C68 O16 -47.8(16) . . . . ?
Mg4 O15 C68 C66 135.6(9) . . . . ?
C65 C66 C68 O15 179.3(7) . . . . ?
C67 C66 C68 O15 -3.9(10) . . . . ?
C65 C66 C68 O16 2.4(11) . . . . ?
C67 C66 C68 O16 179.3(7) . . . . ?
C73 N11 C69 C70 2.0(12) . . . . ?
Mg4 N11 C69 C70 176.2(7) . . . . ?
N11 C69 C70 C71 -4.9(14) . . . . ?
C69 C70 C71 C72 3.6(15) . . . . ?
C70 C71 C72 C73 0.2(14) . . . . ?
C70 C71 C72 C77 178.9(9) . . . . ?
C69 N11 C73 C72 2.3(11) . . . . ?
Mg4 N11 C73 C72 -172.6(6) . . . . ?
C69 N11 C73 C74 -174.3(7) . . . . ?
Mg4 N11 C73 C74 10.8(9) . . . . ?
C71 C72 C73 N11 -3.4(13) . . . . ?
C77 C72 C73 N11 177.9(8) . . . . ?
C71 C72 C73 C74 173.2(8) . . . . ?
C77 C72 C73 C74 -5.6(12) . . . . ?
C80 N12 C74 C75 -3.7(12) . . . . ?
Mg4 N12 C74 C75 168.9(6) . . . . ?
C80 N12 C74 C73 174.4(7) . . . . ?
Mg4 N12 C74 C73 -12.9(9) . . . . ?
N11 C73 C74 N12 1.6(11) . . . . ?
C72 C73 C74 N12 -175.2(7) . . . . ?
N11 C73 C74 C75 179.8(7) . . . . ?
C72 C73 C74 C75 3.0(12) . . . . ?
N12 C74 C75 C78 4.1(12) . . . . ?
C73 C74 C75 C78 -173.9(8) . . . . ?
N12 C74 C75 C76 178.5(8) . . . . ?
C73 C74 C75 C76 0.4(12) . . . . ?
C78 C75 C76 C77 172.6(10) . . . . ?
C74 C75 C76 C77 -1.3(15) . . . . ?
C75 C76 C77 C72 -1.3(16) . . . . ?
C71 C72 C77 C76 -173.9(10) . . . . ?
C73 C72 C77 C76 4.8(15) . . . . ?
C74 C75 C78 C79 -2.5(13) . . . . ?
C76 C75 C78 C79 -176.5(9) . . . . ?
C75 C78 C79 C80 0.7(14) . . . . ?
C74 N12 C80 C79 1.7(11) . . . . ?
Mg4 N12 C80 C79 -169.8(6) . . . . ?
C78 C79 C80 N12 -0.3(13) . . . . ?
 
loop_
 _geom_hbond_atom_site_label_D 
 _geom_hbond_atom_site_label_H 
 _geom_hbond_atom_site_label_A 
 _geom_hbond_distance_DH 
 _geom_hbond_distance_HA 
 _geom_hbond_distance_DA 
 _geom_hbond_angle_DHA 
 _geom_hbond_site_symmetry_A 
N3 H33A N4  0.88 2.26 3.057(9) 150.8 1_455
N3 H33B O10  0.88 2.33 2.945(9) 127.1 .
O1W H1W O10W  0.90(2) 1.80(2) 2.687(7) 172(9) 1_554
O1W H2W O2  0.89(2) 1.82(4) 2.667(6) 158(7) 4_565
O2W H3W O2  0.89(2) 1.76(3) 2.596(6) 156(7) .
N4 H4A O16  0.87(2) 2.09(4) 2.923(9) 158(8) 1_654
O2W H4W O4  0.89(2) 2.17(5) 2.961(6) 148(7) 4_565
O3W H5W O8  0.90(2) 1.73(3) 2.611(6) 165(7) .
O3W H6W O5  0.90(2) 2.01(3) 2.904(6) 169(7) 4_566
O4W H7W O8  0.90(2) 1.79(3) 2.675(6) 169(7) 4_566
O4W H8W O10W  0.89(2) 1.83(2) 2.723(7) 176(7) .
N9 H5A O6  0.88(2) 2.05(2) 2.929(8) 175(9) 1_456
N10 H7A O3  0.88(2) 2.14(4) 2.961(8) 155(7) .
N10 H8A N9  0.89(2) 2.41(7) 3.074(10) 131(8) 1_655
O5W H9W O9W  0.90(2) 1.81(3) 2.700(7) 172(10) .
O5W H10W O12  0.91(2) 1.80(4) 2.680(7) 162(8) 3_657
O6W H11W O14  0.90(2) 1.81(5) 2.615(7) 148(9) .
O7W H13W O15  0.90(2) 2.21(6) 2.922(7) 135(6) 3_658
O7W H14W O12  0.91(2) 1.91(5) 2.605(7) 133(6) .
O8W H15W O14  0.91(2) 1.76(3) 2.651(7) 165(7) 3_658
O8W H16W O9W  0.90(2) 1.81(2) 2.713(8) 173(9) 1_556
O10W H19W O3  0.89(2) 1.88(2) 2.756(7) 168(7) .
O10W H20W O6  0.89(2) 1.90(3) 2.754(7) 160(7) 1_556
O9W H17W O10  0.89(2) 2.11(7) 2.770(8) 130(7) .
O9W H18W O16  0.89(2) 1.89(3) 2.733(8) 160(7) 1_554
 
_refine_diff_density_max    0.890
_refine_diff_density_min   -1.099
_refine_diff_density_rms    0.149

_shelx_res_file
;

    LCS1514c.res created by SHELXL-2014/7


TITL aaa in P2(1)/c

CELL 0.71073 11.7432 47.4332 13.9297 90.000 97.143 90.000
ZERR 8.0000 0.0009 0.0034 0.0009 0.000 0.004 0.000

LATT 1
SYMM -X, 0.5+Y, 0.5-Z

SFAC C H N O MG
UNIT 320 288 48 104 16

MERG 2
SHEL 5.60 0.90
FMAP 2

PLAN 10
TEMP -93
SIZE 0.32 0.2 0.03

BOND $H
CONF
WPDB

ISOR 0.01 C5

DFIX 0.90  0.02 O1W  H1W  O1W H2W
DFIX 1.47  0.02 H1W  H2W

DFIX 0.90  0.02 O2W  H3W   O2W  H4W
DFIX 1.47  0.02 H3W  H4W

DFIX 0.90  0.02 O3W  H5W   O3W  H6W
DFIX 1.47  0.02 H5W  H6W

DFIX 0.90  0.02 O4W  H7W   O4W  H8W
DFIX 1.47  0.02 H7W  H8W

DFIX 0.90  0.02 O5W  H9W   O5W  H10W
DFIX 1.47  0.02 H9W  H10W

DFIX 0.90  0.02 O6W  H11W   O6W  H12W
DFIX 1.47  0.02 H11W  H12W

DFIX 0.90  0.02 O7W  H13W   O7W  H14W
DFIX 1.47  0.02 H13W  H14W

DFIX 0.90  0.02 O8W  H15W   O8W  H16W
DFIX 1.47  0.02 H15W  H16W

DFIX 0.90  0.02 O9W  H17W   O9W  H18W
DFIX 1.47  0.02 H17W  H18W

DFIX 0.90  0.02 O10W  H19W   O10W  H20W
DFIX 1.47  0.02 H19W  H20W

DFIX 0.87 0.02 N4 H3A N4 H4A
DFIX 1.45 0.02 H3A H4A

DFIX 0.87 0.02 N9 H5A N9 H6A
DFIX 1.45 0.02 H5A H6A

DFIX 0.87 0.02 N10 H7A N10 H8A
DFIX 1.45 0.02 H7A H8A

EQIV $1 x-1, y, z
EQIV $2 x, y, z-1
EQIV $3 x, -y+1/2, z-1/2
EQIV $4 x+1, y, z-1
EQIV $5 x, -y+1/2, z+1/2
EQIV $6 x-1, y, z+1
EQIV $7 x+1, y, z
EQIV $8 -x+1, -y, -z+2
EQIV $9 -x+1, -y, -z+3
EQIV $10 x, y, z+1

HTAB N3 N4_$1
HTAB N3 O10
HTAB O1W O10W_$2
HTAB O1W O2_$3
HTAB O2W O2
HTAB N4 O16_$4
HTAB O2W O4_$3
HTAB O3W O8
HTAB O3W O5_$5
HTAB O4W O8_$5
HTAB O4W O10W
HTAB N9 O6_$6
HTAB N10 O3
HTAB N10 N9_$7
HTAB O5W O9W
HTAB O5W O12_$8
HTAB O6W O14
HTAB O7W O15_$9
HTAB O7W O12
HTAB O8W O14_$9
HTAB O8W O9W_$10
HTAB O10W O3
HTAB O10W O6_$10
HTAB O9W O10
HTAB O9W O16_$2

L.S. 50
ACTA

WGHT    0.168400   35.633080
EXTI    0.003283
FVAR       0.13828
MG1   5    0.879398    0.215334    0.494031    11.00000    0.01185    0.01343 =
         0.00850    0.00025    0.00147    0.00187
MG2   5    1.236103    0.214404    1.088090    11.00000    0.00969    0.01313 =
         0.00941   -0.00094    0.00253   -0.00215
O1    4    0.838350    0.201780    0.629123    11.00000    0.01845    0.02367 =
         0.00961   -0.00226   -0.00003   -0.00119
O2    4    0.931725    0.233229    0.728397    11.00000    0.02602    0.01286 =
         0.01133   -0.00017    0.00050   -0.00822
O1W   4    0.918135    0.226611    0.360467    11.00000    0.02961    0.02027 =
         0.01972    0.00814    0.01112    0.01193
O3    4    0.999941    0.158645    1.113761    11.00000    0.03073    0.02898 =
         0.01632    0.01095   -0.00960   -0.01235
O2W   4    0.924940    0.253993    0.555363    11.00000    0.02537    0.01009 =
         0.01459    0.00275    0.00411   -0.00282
O4    4    1.080812    0.196905    1.056300    11.00000    0.01640    0.01780 =
         0.01846    0.00158    0.00009   -0.00818
O3W   4    1.189042    0.252842    1.027578    11.00000    0.02324    0.01305 =
         0.01367   -0.00234    0.00305    0.00260
O5    4    1.038066    0.198609    0.524938    11.00000    0.01651    0.02064 =
         0.01365   -0.00235    0.00044    0.00472
O4W   4    1.191673    0.224490    1.220493    11.00000    0.03127    0.02801 =
         0.01597   -0.01364    0.01500   -0.01230
O6    4    1.122318    0.162388    0.462998    11.00000    0.04879    0.03048 =
         0.01079   -0.01124   -0.00920    0.01959
O7    4    1.279528    0.202219    0.953484    11.00000    0.01799    0.01424 =
         0.01254   -0.00057   -0.00096    0.00393
O8    4    1.193784    0.234265    0.851688    11.00000    0.02134    0.01643 =
         0.00995    0.00175    0.00108    0.00836
N1    3    0.784160    0.176858    0.438031    11.00000    0.02285    0.02954 =
         0.01018    0.00512    0.00127   -0.00331
N2    3    0.702917    0.229773    0.451745    11.00000    0.01646    0.04066 =
         0.00740    0.00079    0.00419    0.00806
N3    3    0.633119    0.147760    0.877970    11.00000    0.02587    0.06642 =
         0.04495    0.02818   -0.01568   -0.02656
AFIX  93
H33A  2    0.580353    0.149127    0.827482    11.00000   -1.20000
H33B  2    0.619649    0.137717    0.928467    11.00000   -1.20000
AFIX   0
N4    3    1.432601    0.130693    0.727953    11.00000    0.03205    0.04146 =
         0.04286   -0.01656   -0.01257    0.00955
N5    3    1.340866    0.176398    1.132982    11.00000    0.02270    0.01965 =
         0.01172    0.00097   -0.00072    0.00345
N6    3    1.409581    0.230655    1.137060    11.00000    0.02362    0.02709 =
         0.00730    0.00208    0.00445   -0.01008
C1    1    0.825499    0.151322    0.424179    11.00000    0.04560    0.02845 =
         0.02061   -0.00486   -0.00959   -0.00790
AFIX  43
H1    2    0.906235    0.148693    0.429474    11.00000   -1.20000
AFIX   0
C2    1    0.751823    0.127802    0.401603    11.00000    0.09147    0.03081 =
         0.03784   -0.01603   -0.00377   -0.00962
AFIX  43
H2    2    0.782987    0.109796    0.390301    11.00000   -1.20000
AFIX   0
C3    1    0.636798    0.131359    0.396398    11.00000    0.07602    0.05657 =
         0.03105    0.00332   -0.01128   -0.05041
AFIX  43
H3    2    0.587417    0.115526    0.385020    11.00000   -1.20000
AFIX   0
C4    1    0.589951    0.158064    0.407581    11.00000    0.04671    0.06214 =
         0.01828    0.00304   -0.00395   -0.03579
C5    1    0.667896    0.180629    0.427705    11.00000    0.02254    0.04275 =
         0.00500   -0.00214   -0.00022   -0.01193
C6    1    0.625198    0.208957    0.432567    11.00000    0.01400    0.05019 =
         0.01306   -0.00321    0.00432   -0.00002
C7    1    0.505407    0.214024    0.414665    11.00000    0.01872    0.09545 =
         0.00501    0.00273    0.00109    0.00648
C8    1    0.428437    0.191203    0.397967    11.00000    0.01586    0.12540 =
         0.02680   -0.00124   -0.00138   -0.01686
AFIX  43
H8    2    0.348182    0.194671    0.387311    11.00000   -1.20000
AFIX   0
C9    1    0.468118    0.164295    0.396996    11.00000    0.04360    0.11850 =
         0.01898    0.00527   -0.00529   -0.05231
AFIX  43
H9    2    0.414675    0.149184    0.389183    11.00000   -1.20000
AFIX   0
C10   1    0.471877    0.242660    0.413016    11.00000    0.03070    0.10508 =
         0.02667    0.00957    0.00577    0.04264
AFIX  43
H10   2    0.392616    0.247178    0.400371    11.00000   -1.20000
AFIX   0
C11   1    0.548755    0.263739    0.428805    11.00000    0.03983    0.08908 =
         0.01921    0.00464    0.00711    0.04665
AFIX  43
H11   2    0.525098    0.282905    0.426049    11.00000   -1.20000
AFIX   0
C12   1    0.665631    0.256382    0.449581    11.00000    0.02646    0.04709 =
         0.01888    0.00573    0.00175    0.02020
AFIX  43
H12   2    0.720403    0.271061    0.462651    11.00000   -1.20000
AFIX   0
C13   1    0.876757    0.210747    0.712212    11.00000    0.01325    0.01746 =
         0.00567    0.00169    0.00476    0.00661
C14   1    0.858537    0.193016    0.799123    11.00000    0.01339    0.02024 =
         0.01277    0.00095    0.00349    0.00039
C15   1    0.758317    0.177212    0.798330    11.00000    0.02999    0.03018 =
         0.01616    0.00786   -0.00764   -0.01687
AFIX  43
H15   2    0.703272    0.177255    0.742249    11.00000   -1.20000
AFIX   0
C16   1    0.737883    0.161482    0.877956    11.00000    0.01081    0.04544 =
         0.04617    0.00719   -0.00598   -0.01370
C17   1    0.819264    0.161500    0.960585    11.00000    0.02743    0.02351 =
         0.01434    0.00989   -0.00273   -0.00797
AFIX  43
H17   2    0.806279    0.150653    1.015519    11.00000   -1.20000
AFIX   0
C18   1    0.920798    0.177673    0.962217    11.00000    0.00770    0.01082 =
         0.01523    0.00485    0.00025   -0.00153
C19   1    0.936634    0.194183    0.881799    11.00000    0.01650    0.01254 =
         0.01341   -0.00196    0.00211   -0.00373
AFIX  43
H19   2    1.001431    0.206265    0.884028    11.00000   -1.20000
AFIX   0
C20   1    1.007445    0.177601    1.051157    11.00000    0.02101    0.02097 =
         0.00362    0.00119    0.00175    0.00824
C21   1    1.112929    0.179372    0.528873    11.00000    0.01202    0.01770 =
         0.01377    0.00104    0.00453   -0.00148
C22   1    1.194150    0.177241    0.621488    11.00000    0.01844    0.01148 =
         0.00637    0.00073    0.00420    0.00181
C23   1    1.280020    0.156347    0.631276    11.00000    0.02165    0.03483 =
         0.01511   -0.00858   -0.00348    0.00999
AFIX  43
H23   2    1.290545    0.144798    0.577359    11.00000   -1.20000
AFIX   0
C24   1    1.349098    0.152357    0.717760    11.00000    0.02727    0.02686 =
         0.02164   -0.00396   -0.00349    0.01319
C25   1    1.337539    0.170961    0.793988    11.00000    0.02453    0.03238 =
         0.01204   -0.00851   -0.00705    0.00859
AFIX  43
H25   2    1.387258    0.169071    0.852867    11.00000   -1.20000
AFIX   0
C26   1    1.256154    0.191845    0.785675    11.00000    0.01581    0.02003 =
         0.00434   -0.00042   -0.00030    0.00324
C27   1    1.183388    0.194905    0.699329    11.00000    0.00764    0.01114 =
         0.01842    0.00142    0.00574    0.00024
AFIX  43
H27   2    1.126104    0.209156    0.693700    11.00000   -1.20000
AFIX   0
C28   1    1.241231    0.210917    0.869732    11.00000    0.00455    0.01611 =
         0.00783   -0.00247   -0.00076   -0.00427
C29   1    1.307541    0.149797    1.125415    11.00000    0.03742    0.02783 =
         0.02760    0.00219   -0.00705   -0.00508
AFIX  43
H29   2    1.227939    0.145588    1.113600    11.00000   -1.20000
AFIX   0
C30   1    1.389079    0.127150    1.134674    11.00000    0.05691    0.02949 =
         0.04164   -0.00182    0.00255    0.00618
AFIX  43
H30   2    1.363609    0.108136    1.129696    11.00000   -1.20000
AFIX   0
C31   1    1.502248    0.133058    1.150510    11.00000    0.05960    0.03804 =
         0.04025    0.00167    0.00265    0.03011
AFIX  43
H31   2    1.556405    0.118087    1.156264    11.00000   -1.20000
AFIX   0
C32   1    1.539647    0.160131    1.158319    11.00000    0.03273    0.05208 =
         0.01718   -0.00130   -0.00080    0.02685
C33   1    1.455903    0.181635    1.147401    11.00000    0.02549    0.03227 =
         0.00704   -0.00159    0.00359    0.00975
C34   1    1.491124    0.210344    1.153237    11.00000    0.01609    0.04440 =
         0.00270    0.00066   -0.00291    0.00167
C35   1    1.609635    0.217040    1.174437    11.00000    0.02064    0.07150 =
         0.00714    0.00662    0.00134   -0.01189
C36   1    1.691906    0.194933    1.185887    11.00000    0.01803    0.09956 =
         0.01998    0.00036   -0.00009    0.01065
AFIX  43
H36   2    1.770967    0.199305    1.201653    11.00000   -1.20000
AFIX   0
C37   1    1.659405    0.168433    1.174812    11.00000    0.02577    0.07748 =
         0.02109   -0.00536    0.00674    0.02629
AFIX  43
H37   2    1.716625    0.154194    1.177738    11.00000   -1.20000
AFIX   0
C38   1    1.639384    0.245741    1.184207    11.00000    0.02467    0.07700 =
         0.03083   -0.00406    0.00032   -0.02956
AFIX  43
H38   2    1.717306    0.251154    1.200300    11.00000   -1.20000
AFIX   0
C39   1    1.554997    0.265796    1.170309    11.00000    0.04119    0.05788 =
         0.03807    0.00132    0.00143   -0.03585
AFIX  43
H39   2    1.573811    0.285250    1.176169    11.00000   -1.20000
AFIX   0
C40   1    1.440871    0.257294    1.147399    11.00000    0.03815    0.03542 =
         0.02548   -0.00085    0.00781   -0.01282
AFIX  43
H40   2    1.383039    0.271393    1.138863    11.00000   -1.20000
AFIX   0
H1W   2    0.955236    0.212946    0.332401    11.00000   -1.50000
H2W   2    0.921008    0.242891    0.328949    11.00000   -1.50000
H3A   2    1.477523    0.143841    0.704522    11.00000   -1.50000
H3W   2    0.934782    0.251581    0.619301    11.00000   -1.50000
H4A   2    1.412411    0.118188    0.682939    11.00000   -1.50000
H4W   2    0.948352    0.270915    0.538629    11.00000   -1.50000
H5W   2    1.186321    0.249476    0.963477    11.00000   -1.50000
H6W   2    1.140768    0.267290    1.035058    11.00000   -1.50000
H7W   2    1.198563    0.239449    1.260251    11.00000   -1.50000
H8W   2    1.142765    0.211892    1.239622    11.00000   -1.50000
MG3   5    0.322915    0.034900    0.952632    11.00000    0.01953    0.02724 =
         0.01775   -0.00102    0.00037   -0.00128
MG4   5    0.678926    0.035393    1.547163    11.00000    0.02515    0.02731 =
         0.01534    0.00131    0.00140    0.00058
O5W   4    0.366399    0.025079    0.819214    11.00000    0.03595    0.03476 =
         0.03085   -0.01052    0.01242   -0.01125
O6W   4    0.372661   -0.003535    1.015448    11.00000    0.02955    0.02962 =
         0.02455   -0.00055    0.00190    0.00196
O7W   4    0.636064   -0.003648    1.488163    11.00000    0.03690    0.03716 =
         0.02146    0.00521    0.00446   -0.00465
O9    4    0.479119    0.052644    0.983543    11.00000    0.02317    0.03546 =
         0.02591   -0.00309   -0.00034   -0.01311
O8W   4    0.639589    0.023865    1.679581    11.00000    0.04282    0.03078 =
         0.02951    0.00608    0.01068    0.00516
O10   4    0.557702    0.091075    0.928934    11.00000    0.03840    0.03369 =
         0.02711    0.00415   -0.00874   -0.00785
O11   4    0.722743    0.048026    1.411845    11.00000    0.03391    0.03418 =
         0.01582   -0.00188    0.00083   -0.00734
O12   4    0.630064    0.015891    1.312849    11.00000    0.04052    0.03183 =
         0.02121   -0.00256    0.00765   -0.01115
O13   4    0.281928    0.048213    1.086724    11.00000    0.03313    0.02946 =
         0.01122   -0.00099   -0.00143    0.00226
O14   4    0.367500    0.016507    1.189724    11.00000    0.03928    0.02872 =
         0.01904    0.00023    0.00609    0.00788
O15   4    0.519471    0.051797    1.514769    11.00000    0.02825    0.03009 =
         0.02295   -0.00067   -0.00324    0.00874
O16   4    0.432258    0.087338    1.578776    11.00000    0.05571    0.04113 =
         0.03043   -0.00527   -0.00792    0.01620
N7    3    0.215558    0.072359    0.907121    11.00000    0.02532    0.02220 =
         0.02162    0.00297    0.00146   -0.00169
N8    3    0.150117    0.017853    0.908254    11.00000    0.01951    0.02862 =
         0.02079   -0.00605    0.00047   -0.00713
N9    3    0.127988    0.119557    1.312239    11.00000    0.04238    0.04187 =
         0.02494   -0.01288   -0.00375    0.01435
N10   3    0.929105    0.100881    1.161032    11.00000    0.03493    0.03669 =
         0.04256    0.01677   -0.01166   -0.01949
N11   3    0.857191    0.022117    1.592695    11.00000    0.02599    0.04213 =
         0.01883    0.00392   -0.00142    0.00660
N12   3    0.772161    0.074325    1.602060    11.00000    0.03352    0.03566 =
         0.01553   -0.00651   -0.00204   -0.00362
C41   1    0.247741    0.099222    0.909922    11.00000    0.03414    0.03824 =
         0.01890    0.00515    0.00512   -0.00467
AFIX  43
H41   2    0.327630    0.103220    0.918005    11.00000   -1.20000
AFIX   0
C42   1    0.171422    0.122019    0.901719    11.00000    0.05081    0.02528 =
         0.03975    0.00214    0.01454    0.00589
AFIX  43
H42   2    0.198039    0.140932    0.907360    11.00000   -1.20000
AFIX   0
C43   1    0.056067    0.115827    0.885114    11.00000    0.04180    0.04195 =
         0.03426    0.00345    0.00886    0.01414
AFIX  43
H43   2    0.001800    0.130739    0.875915    11.00000   -1.20000
AFIX   0
C44   1    0.017875    0.087996    0.881623    11.00000    0.02895    0.04208 =
         0.01864    0.00360    0.00544    0.00650
C45   1    0.100486    0.066848    0.892383    11.00000    0.02483    0.03215 =
         0.01438   -0.00156    0.00320    0.00240
C46   1    0.067326    0.037600    0.889942    11.00000    0.01434    0.03485 =
         0.02436    0.00079   -0.00034   -0.00248
C47   1   -0.049010    0.030999    0.869403    11.00000    0.02193    0.04934 =
         0.02006    0.00503    0.00178    0.00538
C48   1   -0.133822    0.053354    0.856572    11.00000    0.01488    0.06876 =
         0.03467    0.01318    0.00267    0.00218
AFIX  43
H48   2   -0.213052    0.048774    0.844332    11.00000   -1.20000
AFIX   0
C49   1   -0.101564    0.080022    0.861801    11.00000    0.02917    0.06121 =
         0.03142    0.01314    0.00589    0.01997
AFIX  43
H49   2   -0.158336    0.094359    0.852288    11.00000   -1.20000
AFIX   0
C50   1   -0.078062    0.002020    0.862825    11.00000    0.02760    0.06030 =
         0.03541   -0.00356   -0.00213   -0.01875
AFIX  43
H50   2   -0.155804   -0.003519    0.846525    11.00000   -1.20000
AFIX   0
C51   1    0.005124   -0.017793    0.879802    11.00000    0.03929    0.04009 =
         0.03971   -0.00408    0.00380   -0.01692
AFIX  43
H51   2   -0.013798   -0.037268    0.876165    11.00000   -1.20000
AFIX   0
C52   1    0.119205   -0.009207    0.902749    11.00000    0.04083    0.02988 =
         0.02324   -0.00452    0.00555   -0.00563
AFIX  43
H52   2    0.177003   -0.023218    0.914905    11.00000   -1.20000
AFIX   0
C53   1    0.553450    0.071883    0.990659    11.00000    0.02477    0.02543 =
         0.02232   -0.00494    0.00410   -0.00496
C54   1    0.643893    0.071288    1.077672    11.00000    0.02101    0.02616 =
         0.01620   -0.00711    0.00172   -0.00206
C55   1    0.742310    0.086956    1.078766    11.00000    0.00973    0.03312 =
         0.03454    0.00240    0.00260   -0.00144
AFIX  43
H55   2    0.754641    0.097739    1.023520    11.00000   -1.20000
AFIX   0
C56   1    0.825850    0.087194    1.161715    11.00000    0.02518    0.02275 =
         0.02043    0.00209    0.00365   -0.00486
C57   1    0.803680    0.071565    1.242051    11.00000    0.01303    0.03564 =
         0.03149   -0.00348   -0.00299    0.00225
AFIX  43
H57   2    0.857878    0.071700    1.298679    11.00000   -1.20000
AFIX   0
C58   1    0.704636    0.055915    1.240926    11.00000    0.02932    0.01688 =
         0.01923   -0.00067   -0.00015    0.00262
C59   1    0.623809    0.055135    1.158047    11.00000    0.01854    0.02461 =
         0.02675   -0.00299    0.00760   -0.00438
AFIX  43
H59   2    0.556698    0.043872    1.156392    11.00000   -1.20000
AFIX   0
C60   1    0.683668    0.038837    1.328635    11.00000    0.02014    0.02972 =
         0.02388   -0.00757    0.00727   -0.00199
C61   1    0.319941    0.040290    1.170494    11.00000    0.01619    0.02342 =
         0.01622    0.00267    0.00080    0.00040
C62   1    0.305168    0.059188    1.255393    11.00000    0.01714    0.02315 =
         0.02016    0.00118    0.00234   -0.00056
C63   1    0.223576    0.080798    1.244161    11.00000    0.02083    0.02258 =
         0.02816   -0.00018   -0.00396    0.00203
AFIX  43
H63   2    0.176561    0.083346    1.184194    11.00000   -1.20000
AFIX   0
C64   1    0.212267    0.098400    1.321501    11.00000    0.01270    0.02863 =
         0.03127   -0.00975   -0.00293    0.00529
C65   1    0.282624    0.094052    1.410512    11.00000    0.02540    0.03197 =
         0.02043   -0.00914    0.00520   -0.00189
AFIX  43
H65   2    0.272483    0.105401    1.464999    11.00000   -1.20000
AFIX   0
C66   1    0.364497    0.073694    1.418046    11.00000    0.01831    0.01884 =
         0.01970   -0.00029    0.00168   -0.00312
C67   1    0.379600    0.055955    1.341161    11.00000    0.02128    0.01665 =
         0.01642    0.00149    0.00123   -0.00025
AFIX  43
H67   2    0.438499    0.042108    1.346719    11.00000   -1.20000
AFIX   0
C68   1    0.445770    0.070997    1.509899    11.00000    0.04038    0.01264 =
         0.01375   -0.00398    0.00574    0.00485
C69   1    0.897892   -0.004078    1.597369    11.00000    0.05434    0.05432 =
         0.01962    0.00747    0.00457    0.02359
AFIX  43
H69   2    0.845085   -0.019130    1.583310    11.00000   -1.20000
AFIX   0
C70   1    1.013947   -0.010768    1.621782    11.00000    0.05660    0.08685 =
         0.04727    0.01129    0.01095    0.04339
AFIX  43
H70   2    1.039236   -0.029755    1.629297    11.00000   -1.20000
AFIX   0
C71   1    1.089558    0.011395    1.634365    11.00000    0.02869    0.11152 =
         0.03991    0.00196   -0.00439    0.02571
AFIX  43
H71   2    1.169441    0.007616    1.647268    11.00000   -1.20000
AFIX   0
C72   1    1.052087    0.039293    1.628687    11.00000    0.02076    0.11771 =
         0.02751    0.00105    0.00229    0.00228
C73   1    0.932276    0.043467    1.609655    11.00000    0.02347    0.07314 =
         0.01275    0.00008    0.00530    0.00194
C74   1    0.887472    0.071646    1.613552    11.00000    0.03490    0.05412 =
         0.02279   -0.00516    0.00680   -0.01419
C75   1    0.963738    0.094790    1.631625    11.00000    0.05296    0.08926 =
         0.01446   -0.00552   -0.00662   -0.03388
C76   1    1.086097    0.089330    1.645180    11.00000    0.04210    0.11216 =
         0.04933   -0.00559    0.00884   -0.03966
AFIX  43
H76   2    1.138119    0.104672    1.655971    11.00000   -1.20000
AFIX   0
C77   1    1.126897    0.063159    1.642768    11.00000    0.03567    0.15350 =
         0.02852   -0.00898    0.01041   -0.03172
AFIX  43
H77   2    1.207572    0.060271    1.650581    11.00000   -1.20000
AFIX   0
C78   1    0.914589    0.121185    1.643840    11.00000    0.07666    0.04819 =
         0.02987   -0.00300    0.00771   -0.03033
AFIX  43
H78   2    0.961595    0.137291    1.658637    11.00000   -1.20000
AFIX   0
C79   1    0.798510    0.123385    1.634177    11.00000    0.08058    0.04027 =
         0.03616   -0.00792   -0.00218   -0.01754
AFIX  43
H79   2    0.764432    0.141290    1.641605    11.00000   -1.20000
AFIX   0
C80   1    0.727880    0.099808    1.613479    11.00000    0.07099    0.02622 =
         0.02598   -0.00407    0.00586    0.00366
AFIX  43
H80   2    0.646902    0.102019    1.607465    11.00000   -1.20000
AFIX   0
H5A   2    0.122003    0.131884    1.358224    11.00000   -1.50000
H6A   2    0.117032    0.127074    1.254436    11.00000   -1.50000
H7A   2    0.940405    0.116419    1.129342    11.00000   -1.50000
H8A   2    0.950036    0.103436    1.224033    11.00000   -1.50000
H9W   2    0.407613    0.038408    0.793643    11.00000   -1.50000
H10W  2    0.369391    0.008864    0.785154    11.00000   -1.50000
H11W  2    0.382429   -0.003040    1.080266    11.00000   -1.50000
H12W  2    0.316737   -0.015344    0.993006    11.00000   -1.50000
H13W  2    0.608980   -0.018143    1.520673    11.00000   -1.50000
H14W  2    0.601591   -0.003979    1.426313    11.00000   -1.50000
H15W  2    0.642046    0.008064    1.717085    11.00000   -1.50000
H16W  2    0.600431    0.037151    1.708606    11.00000   -1.50000
O10W  4    1.045514    0.186778    1.287422    11.00000    0.04277    0.02028 =
         0.01219    0.00052    0.01170    0.00310
H19W  2    1.023391    0.176313    1.235492    11.00000   -1.50000
H20W  2    1.054748    0.176568    1.341132    11.00000   -1.50000
O9W   4    0.508120    0.063413    0.753573    11.00000    0.04645    0.03113 =
         0.02529    0.00389    0.01013   -0.00238
H17W  2    0.564728    0.069526    0.797182    11.00000   -1.50000
H18W  2    0.499128    0.073535    0.699694    11.00000   -1.50000
HKLF 4

REM  aaa in P2(1)/c
REM R1 =  0.1085 for    6552 Fo > 4sig(Fo)  and  0.1583 for all   10997 data
REM   1178 parameters refined using     45 restraints

END

WGHT      0.1669     35.9095

REM Highest difference peak  0.890,  deepest hole -1.099,  1-sigma level  0.149
Q1    1   0.7954  0.0353  1.6292  11.00000  0.05    0.89
Q2    1   0.6901  0.1293  0.8480  11.00000  0.05    0.89
Q3    1   0.4572  0.0391  1.0388  11.00000  0.05    0.87
Q4    1   0.6499  0.2147  0.3340  11.00000  0.05    0.78
Q5    1   1.5023  0.1530  0.6926  11.00000  0.05    0.76
Q6    1   0.9355  0.2351  0.7043  11.00000  0.05    0.74
Q7    1   0.9896  0.2146  0.9235  11.00000  0.05    0.70
Q8    1   0.6827  0.2544  0.4030  11.00000  0.05    0.68
Q9    1  -0.2349  0.0236  0.7778  11.00000  0.05    0.68
Q10   1   0.4844  0.0161  1.2526  11.00000  0.05    0.68
;
_shelx_res_checksum   66707

_shelx_hkl_file
;
  -1   0   0 -0.4872  0.4123   3
   1   0   0 -0.2322  0.2221   3
   1   0   0 -0.1026  0.2597   2
   1   0   0 -0.1036  0.2637   1
   2   0   0 40.1274  4.3672   3
   2   0   0 42.6136  4.1148   1
  -2   0   0 35.9697  4.6968   3
  -2   0   0 34.1193  4.5552   6
   2   0   0 42.7981  4.3367   2
   3   0   0 76.4485  6.2817   1
   3   0   0 62.9768  6.4416   2
  -3   0   0 43.9527  6.6120   6
  -3   0   0 56.4264  7.0839   3
   3   0   0 69.2676  6.4947   3
  -4   0   0 250.972  26.713   3
   4   0   0 305.261  25.886   2
   4   0   0 285.225  26.435   3
  -4   0   0 289.235  26.400   3
   4   0   0 315.654  25.879   1
  -4   0   0 261.894  26.581   6
   5   0   0 159.874  14.496   2
  -5   0   0 134.560  14.948   6
   5   0   0 154.596  14.922   3
  -5   0   0 126.039  15.272   3
  -5   0   0 161.542  14.919   3
   5   0   0 170.670  14.497   1
   6   0   0 8.78924 3.63097   3
   6   0   0 11.9761  3.1779   2
  -6   0   0 6.31155 4.04253   3
   6   0   0 8.42195 2.85553   1
  -6   0   0 5.72712 3.46682   6
  -6   0   0 6.45546 3.14152   3
  -7   0   0 399.052  36.716   6
  -7   0   0 420.982  37.161   3
   7   0   0 408.290  35.834   2
   7   0   0 384.210  35.918   1
   7   0   0 368.705  36.756   3
  -7   0   0 388.409  36.668   3
   8   0   0 1.67845 2.73027   2
  -8   0   0 1.09544 3.23177   3
   8   0   0 0.82370 2.80138   1
  -8   0   0 4.62107 3.63380   3
  -8   0   0 -2.4685  2.6431   6
   8   0   0 -0.8987  3.8142   3
  -9   0   0 26.3992  4.6412   6
   9   0   0 47.4670  5.9209   1
  -9   0   0 31.1362  5.9223   3
   9   0   0 27.1611  4.7902   2
 -10   0   0 7.02865 3.11942   6
  10   0   0 12.0440  4.4160   1
 -10   0   0 6.04218 4.41297   3
  10   0   0 5.54460 3.51469   2
  11   0   0 17.2195  4.6320   2
 -11   0   0 23.5496  5.5067   3
  11   0   0 27.8363  6.0460   1
 -12   0   0 6.68834 4.61378   3
  12   0   0 9.00535 5.34881   1
 -13   0   0 5.44088 4.25965   3
  13   0   0 2.32388 5.60611   1
 -14   0   0 -1.5863  4.3480   3
   1  -1   0 0.00538 0.28758   2
  -1  -1   0 0.37861 0.45808   3
   1  -1   0 -0.1125  0.2855   1
   1   1   0 -0.2914  0.2077   2
  -1   1   0 -0.2545  0.3769   3
  -1   1   0 -0.0018  0.2552   3
   1   1   0 -0.2395  0.2118   3
   1   1   0 -0.1952  0.2501   1
  -2  -1   0 1.25982 1.79409   6
   2  -1   0 1.50598 1.15890   1
  -2  -1   0 1.50842 1.93787   3
   2  -1   0 1.90659 1.41509   2
   2   1   0 0.19406 1.08927   1
  -2   1   0 1.45960 0.89750   3
  -2   1   0 1.28223 1.62767   6
  -2   1   0 -0.5304  1.8325   3
   2   1   0 0.29882 1.24569   2
   2   1   0 2.04516 1.43435   3
  -3  -1   0 248.969  27.458   3
   3  -1   0 300.290  26.639   1
  -3  -1   0 258.905  27.454   6
   3  -1   0 297.524  26.710   2
  -3   1   0 283.109  27.465   3
   3   1   0 353.333  26.689   1
   3   1   0 322.424  26.686   2
   4  -1   0 517.282  46.473   2
   4  -1   0 514.266  47.515   3
  -4  -1   0 589.655  47.803   6
   4  -1   0 465.611  46.414   1
  -4  -1   0 564.434  47.859   3
  -4   1   0 522.565  47.469   3
  -4   1   0 521.177  47.675   6
   4   1   0 486.015  46.445   1
  -4   1   0 497.342  47.745   3
   4   1   0 546.999  47.550   3
   4   1   0 494.687  46.403   2
   5  -1   0 186.084  16.626   2
  -5  -1   0 174.504  16.926   3
  -5  -1   0 179.998  17.173   6
   5  -1   0 184.126  17.023   3
   5  -1   0 166.108  16.463   1
  -5  -1   0 147.531  17.414   3
   5   1   0 166.760  16.458   1
   5   1   0 155.671  16.920   3
  -5   1   0 193.149  16.988   3
  -5   1   0 206.847  17.614   3
  -5   1   0 197.833  17.090   6
   5   1   0 162.632  16.496   2
   6  -1   0 39.5929  5.1661   2
   6  -1   0 33.2109  4.9956   1
  -6  -1   0 52.9443  5.9004   6
   6  -1   0 42.4819  5.6437   3
  -6  -1   0 39.9774  5.2579   3
  -6  -1   0 47.4256  6.3305   3
  -6   1   0 32.6588  5.1016   3
   6   1   0 48.2203  5.7200   3
   6   1   0 35.1115  5.0129   2
  -6   1   0 35.0140  5.9008   3
  -6   1   0 26.8934  5.1757   6
   6   1   0 51.4700  5.6830   1
   7  -1   0 57.3303  7.0145   3
   7  -1   0 56.9471  6.3270   2
  -7  -1   0 29.4134  5.8713   3
  -7  -1   0 52.7555  6.4723   6
  -7  -1   0 50.4846  6.7617   3
   7  -1   0 39.1508  5.8149   1
  -7   1   0 60.3040  7.2296   3
   7   1   0 41.3917  6.2652   3
  -7   1   0 59.5482  6.3285   6
   7   1   0 55.2138  6.1963   2
   7   1   0 38.9413  5.7574   1
  -7   1   0 63.9548  6.8031   3
  -8  -1   0 2.75052 3.38574   3
   8  -1   0 -3.1574  2.5974   1
  -8  -1   0 7.15597 3.29094   6
  -8  -1   0 8.71263 4.00312   3
   8  -1   0 6.36305 4.08647   3
   8  -1   0 6.39303 2.98553   2
  -8   1   0 3.65250 3.60841   3
  -8   1   0 4.66465 2.73404   6
   8   1   0 2.48448 2.77575   2
  -8   1   0 -0.9133  3.1756   3
   8   1   0 7.87835 4.16770   3
   8   1   0 -2.1819  2.6148   1
  -9  -1   0 -1.1863  3.8999   3
   9  -1   0 1.98508 3.01717   2
  -9  -1   0 2.06291 3.11659   6
   9  -1   0 1.62968 3.14422   1
   9   1   0 -1.6367  3.1601   1
   9   1   0 5.17732 3.00636   2
  -9   1   0 1.14538 2.67537   6
  -9   1   0 -5.1338  3.5829   3
  10  -1   0 21.8741  4.4674   2
 -10  -1   0 25.5826  5.5943   3
  10  -1   0 23.2335  5.1518   1
 -10  -1   0 15.2219  4.0170   6
  10   1   0 20.0099  4.3599   2
 -10   1   0 23.0058  5.4659   3
  10   1   0 22.4072  5.1795   1
  11  -1   0 1.86422 3.69498   2
  11  -1   0 4.08352 4.53512   1
 -11  -1   0 3.23870 4.41742   3
  11   1   0 5.60499 3.69904   2
  11   1   0 10.9288  4.7546   1
 -11   1   0 11.1145  4.5561   3
  12  -1   0 24.3881  6.4200   1
 -12  -1   0 14.2762  5.2732   3
  12   1   0 27.2396  6.4095   1
 -12   1   0 16.2952  5.2638   3
  13  -1   0 7.40852 5.71547   1
 -13  -1   0 17.7544  5.1552   3
 -13   1   0 13.4196  4.7444   3
 -14  -1   0 -5.1751  4.1733   3
 -14   1   0 3.81599 4.52883   3
   0  -2   0 0.09749 0.14028   1
   0   2   0 -0.0808  0.0913   3
  -1   2   0 35.7121  3.4274   3
  -2  -2   0 -1.2138  1.8664   3
   2  -2   0 -0.7588  1.4892   2
   2  -2   0 -0.2678  1.0999   1
  -2   2   0 -0.0679  1.2916   6
   2   2   0 -1.0143  1.1349   2
  -2   2   0 0.16324 1.61366   3
   2   2   0 -0.4716  0.9987   1
   2   2   0 0.78356 1.39664   3
  -2   2   0 0.19105 1.25856   3
   3  -2   0 698.886  61.198   1
  -3  -2   0 612.698  62.875   6
   3  -2   0 719.116  61.215   2
  -3  -2   0 622.578  62.802   3
  -3   2   0 631.938  62.747   6
  -3   2   0 619.373  62.709   3
   3   2   0 763.501  62.643   3
  -3   2   0 776.729  62.585   3
   3   2   0 663.598  61.125   2
   3   2   0 753.610  61.229   1
  -4  -2   0 192.958  19.683   6
   4  -2   0 205.647  19.431   3
   4  -2   0 228.442  19.126   2
  -4  -2   0 198.728  19.817   3
   4  -2   0 240.194  19.017   1
   4   2   0 224.363  18.962   1
  -4   2   0 166.969  19.389   6
   4   2   0 219.865  19.024   2
   4   2   0 219.486  19.464   3
  -4   2   0 179.390  19.639   3
  -4   2   0 206.032  19.345   3
   5  -2   0 63.9579  7.1886   3
  -5  -2   0 42.5770  6.4113   3
   5  -2   0 77.1164  7.0900   2
  -5  -2   0 50.9804  6.9098   6
   5  -2   0 55.7946  6.5401   1
  -5  -2   0 51.0585  7.2384   3
   5   2   0 61.7183  7.0637   3
   5   2   0 63.8511  6.4604   1
  -5   2   0 50.9617  7.0653   3
   5   2   0 66.5087  6.7203   2
  -5   2   0 55.4746  7.2039   3
  -5   2   0 57.4431  6.8809   6
   6  -2   0 148.941  13.625   2
  -6  -2   0 125.932  14.100   6
  -6  -2   0 127.623  14.688   3
  -6  -2   0 125.209  13.852   3
   6  -2   0 145.829  14.027   3
   6  -2   0 149.111  13.551   1
  -6   2   0 140.389  13.789   3
   6   2   0 136.212  13.946   3
  -6   2   0 124.313  14.242   3
   6   2   0 139.425  13.461   1
  -6   2   0 142.180  13.663   6
   6   2   0 146.504  13.492   2
  -7  -2   0 1.40004 3.27671   6
   7  -2   0 5.12477 2.77388   2
   7  -2   0 4.68798 3.60635   3
  -7  -2   0 4.25817 3.29548   3
  -7  -2   0 8.76566 4.03224   3
   7  -2   0 6.53235 2.89895   1
   7   2   0 0.13813 3.40499   3
  -7   2   0 11.7438  3.6524   3
   7   2   0 3.98009 2.71453   2
  -7   2   0 9.14664 2.83073   6
  -7   2   0 5.35592 3.09393   3
   7   2   0 2.87489 2.67290   1
   8  -2   0 57.4420  7.2784   3
   8  -2   0 46.4567  6.2945   2
  -8  -2   0 51.9340  6.5742   6
  -8  -2   0 53.5116  7.3800   3
   8  -2   0 60.9636  6.8518   1
   8   2   0 47.9503  7.0694   3
  -8   2   0 55.3465  7.0812   3
  -8   2   0 41.8629  6.4483   3
  -8   2   0 44.9045  6.0624   6
   8   2   0 54.1571  6.3641   2
   8   2   0 53.5863  6.6281   1
  -9  -2   0 1.97575 4.14148   3
   9  -2   0 -3.0910  3.0050   1
  -9  -2   0 -1.5862  3.1799   6
   9  -2   0 -3.3722  2.8437   2
  -9   2   0 7.35808 4.00104   3
  -9   2   0 -2.2672  2.5815   6
   9   2   0 -0.2042  3.2212   1
   9   2   0 1.11111 2.92862   2
  10  -2   0 9.28776 4.48430   1
 -10  -2   0 8.50554 4.70385   3
  10  -2   0 10.1932  3.7330   2
 -10  -2   0 16.2767  3.8304   6
 -10   2   0 15.5991  4.8409   3
  10   2   0 11.7640  3.7587   2
  10   2   0 13.5504  4.4147   1
 -11  -2   0 -2.7819  4.1490   3
  11  -2   0 -3.4061  4.1786   1
  11  -2   0 2.10491 3.61311   2
  11   2   0 -0.9695  3.4625   2
  11   2   0 3.71171 4.48386   1
 -11   2   0 -2.3972  3.9916   3
 -12  -2   0 18.3305  5.4205   3
  12  -2   0 22.1259  6.2575   1
 -12   2   0 14.8522  4.9251   3
  12   2   0 15.3611  5.9536   1
  13  -2   0 27.1215  6.6795   1
 -13  -2   0 7.33761 5.08703   3
 -13   2   0 21.5467  5.1398   3
 -14  -2   0 4.56826 4.74387   3
 -14   2   0 -1.0030  4.2728   3
   0  -3   0 0.22101 0.18005   5
   0  -3   0 0.09442 0.18481   1
   0   3   0 -0.0258  0.1058   1
   0   3   0 -0.0281  0.0852   5
   0   3   0 0.05206 0.19251   3
   1  -3   0 1.05485 0.49918   1
  -1  -3   0 2.08948 0.75018   1
   1   3   0 2.72122 0.49028   1
  -1   3   0 1.62383 0.52073   3
   1   3   0 -0.1075  0.3058   3
  -1   3   0 1.62709 0.62659   3
   1   3   0 0.13078 0.28135   2
   2  -3   0 8.01335 1.75269   1
  -2  -3   0 12.5343  2.5855   3
   2  -3   0 2.65501 2.04282   2
   2   3   0 15.4609  1.9075   2
  -2   3   0 23.9789  2.5462   3
   2   3   0 23.4811  2.1877   1
  -2   3   0 6.25105 1.76312   6
  -2   3   0 6.12403 2.07862   3
  -3  -3   0 572.273  48.665   6
   3   3   0 513.934  47.195   2
  -3   3   0 525.138  48.403   6
   3   3   0 565.195  47.267   1
  -3   3   0 468.733  48.410   3
  -4  -3   0 606.612  61.026   3
   4  -3   0 624.539  59.397   1
  -4  -3   0 626.538  61.063   6
   4  -3   0 663.849  59.413   2
   4  -3   0 692.342  60.763   3
   4   3   0 631.779  59.309   2
   4   3   0 619.947  59.372   1
  -4   3   0 721.687  60.944   3
  -4   3   0 753.748  60.871   6
  -4   3   0 716.342  60.696   3
   4   3   0 652.036  60.764   3
   5  -3   0 128.389  12.834   2
   5  -3   0 111.005  12.551   1
  -5  -3   0 164.128  13.832   3
  -5  -3   0 149.955  13.528   6
   5  -3   0 115.612  13.017   3
   5   3   0 129.737  13.004   3
   5   3   0 138.217  12.637   2
  -5   3   0 123.332  12.722   6
  -5   3   0 121.190  13.334   3
  -5   3   0 129.893  12.871   3
   5   3   0 137.448  12.574   1
   6  -3   0 102.775  10.132   1
   6  -3   0 100.795  10.533   3
   6  -3   0 100.962  10.254   2
  -6  -3   0 75.2567 10.3796   3
  -6  -3   0 86.4522 10.6989   6
  -6  -3   0 94.0251 10.9448   3
   6   3   0 99.7899 10.0364   2
   6   3   0 100.836  10.490   3
  -6   3   0 100.243  10.759   3
  -6   3   0 98.6383  9.9908   6
  -6   3   0 107.189  10.311   3
   6   3   0 93.8629  9.9938   1
   7  -3   0 35.3622  5.2236   3
  -7  -3   0 32.8215  5.7027   3
  -7  -3   0 23.2152  4.9399   6
   7  -3   0 37.4189  4.6392   2
   7  -3   0 26.8448  4.3788   1
  -7  -3   0 24.7515  4.6662   3
  -7   3   0 22.7113  4.0074   6
  -7   3   0 25.2464  4.8726   3
   7   3   0 41.7189  4.8262   1
  -7   3   0 27.3218  4.4306   3
   7   3   0 37.0274  5.2059   3
   7   3   0 30.4597  4.3247   2
   8  -3   0 9.26032 4.32182   3
   8  -3   0 1.71905 2.71808   2
   8  -3   0 0.61918 2.78989   1
  -8  -3   0 -0.8406  3.7212   3
  -8  -3   0 -0.2605  3.1100   6
   8   3   0 0.11008 2.66165   1
   8   3   0 3.56468 2.59730   2
  -8   3   0 2.07202 2.52299   6
  -8   3   0 1.54574 3.29906   3
  -8   3   0 11.9652  3.7556   3
   8   3   0 3.87279 3.97611   3
   9  -3   0 -1.3727  3.1177   2
  -9  -3   0 -4.5605  3.3507   6
  -9  -3   0 2.97450 4.32827   3
   9  -3   0 2.42777 3.44159   1
  -9   3   0 2.93580 2.47694   6
   9   3   0 1.67214 2.91243   2
   9   3   0 -0.3024  3.1907   1
  -9   3   0 10.0765  3.9045   3
  10  -3   0 5.60990 4.41608   1
 -10  -3   0 9.71938 3.78738   6
  10  -3   0 6.97480 3.76086   2
 -10  -3   0 10.1933  5.2043   3
 -10   3   0 8.76981 4.49060   3
  10   3   0 14.2697  3.7899   2
  10   3   0 12.5860  4.4303   1
 -11  -3   0 2.29472 4.54221   3
  11  -3   0 3.69842 3.77759   2
  11  -3   0 9.08807 5.14351   1
  11   3   0 0.20896 3.55371   2
  11   3   0 5.84562 4.34804   1
 -11   3   0 3.36095 4.18641   3
 -12  -3   0 14.3163  5.6950   3
  12  -3   0 20.3292  6.0740   1
  12   3   0 18.8788  6.1991   1
 -12   3   0 20.3438  5.1632   3
  12   3   0 30.4745  5.1228   2
 -13  -3   0 20.0329  5.9327   3
  13  -3   0 32.3726  7.4413   1
 -13   3   0 36.0619  6.0021   3
 -14  -3   0 4.46499 4.79439   3
 -14   3   0 8.39419 4.48281   3
   1  -4   0 -0.2126  0.5414   1
  -1  -4   0 0.41569 0.75346   1
  -1   4   0 0.38692 0.50874   3
   1   4   0 0.45351 0.48252   1
   1   4   0 -0.7644  0.2733   2
  -1   4   0 0.35040 0.68615   3
   1   4   0 -0.3157  0.4338   3
   2  -4   0 67.1000  6.8869   1
  -2  -4   0 62.8946  7.4409   3
   2  -4   0 53.4419  7.0753   2
  -2   4   0 85.0067  7.0686   3
   2   4   0 69.8960  6.9001   2
   2   4   0 83.3668  7.1777   3
  -2   4   0 62.1496  7.1419   3
   2   4   0 79.8129  6.8502   1
  -3  -4   0 96.2406 11.4295   3
   3  -4   0 124.117  10.861   1
  -3  -4   0 84.8893 11.4008   6
   3  -4   0 113.369  11.041   2
   3   4   0 130.675  11.194   3
  -3   4   0 104.116  11.230   3
  -3   4   0 97.7286 10.9498   6
   3   4   0 127.590  10.831   2
   3   4   0 136.164  10.802   1
  -3   4   0 133.865  11.053   3
   4  -4   0 532.690  42.975   1
   4  -4   0 514.590  43.011   2
  -4  -4   0 458.631  44.227   3
  -4  -4   0 451.979  44.197   6
  -4   4   0 473.083  43.790   3
   4   4   0 485.993  43.918   3
   4   4   0 529.634  42.949   1
  -4   4   0 449.079  43.997   3
  -4   4   0 402.964  43.813   6
   4   4   0 496.354  42.874   2
   5  -4   0 69.9164  7.0788   3
   5  -4   0 55.8207  6.6345   1
   5  -4   0 66.7890  7.0678   2
  -5  -4   0 56.2863  7.4903   3
  -5  -4   0 48.3282  6.9897   6
  -5   4   0 45.5371  6.3395   6
   5   4   0 55.9685  6.9016   3
   5   4   0 71.0623  6.5308   1
  -5   4   0 43.3218  6.7469   3
  -5   4   0 57.7592  6.6727   3
   5   4   0 50.5179  6.4660   2
   6  -4   0 51.1142  6.1121   2
  -6  -4   0 43.4310  7.0257   3
   6  -4   0 48.4555  6.2432   1
  -6  -4   0 51.3504  6.7515   6
   6  -4   0 45.0269  6.4324   3
   6   4   0 50.0324  6.2641   3
  -6   4   0 56.4211  6.6455   3
   6   4   0 55.2296  6.2360   2
  -6   4   0 45.4552  5.8682   3
  -6   4   0 41.3984  5.8864   6
   6   4   0 49.0510  6.2261   1
   7  -4   0 127.619  12.587   1
  -7  -4   0 135.684  13.461   3
  -7  -4   0 125.867  13.105   3
  -7  -4   0 128.751  13.140   6
   7  -4   0 121.384  12.536   2
   7  -4   0 128.890  13.271   3
   7   4   0 132.533  12.574   1
   7   4   0 125.078  12.411   2
  -7   4   0 126.300  12.347   6
   7   4   0 105.893  12.926   3
  -7   4   0 132.640  13.130   3
  -7   4   0 131.560  12.841   3
   8  -4   0 -0.3718  2.6914   2
  -8  -4   0 5.02891 3.60326   6
   8  -4   0 -0.0352  2.8305   1
   8  -4   0 -4.5520  3.9251   3
  -8  -4   0 2.19300 3.88352   3
  -8   4   0 -3.7231  2.1191   6
  -8   4   0 -0.8475  3.1957   3
  -8   4   0 1.08465 3.07182   3
   8   4   0 -0.4378  2.5582   2
   8   4   0 2.82705 3.84253   3
   8   4   0 -2.6037  2.4743   1
   9  -4   0 11.7356  4.3099   1
  -9  -4   0 20.9432  4.4941   6
   9  -4   0 7.41014 3.77409   2
  -9  -4   0 31.8800  5.8078   3
   9   4   0 26.4337  4.6064   1
   9   4   0 16.6863  3.9178   2
  -9   4   0 9.75567 4.30708   3
 -10  -4   0 -6.2929  3.5519   6
  10  -4   0 1.40245 3.54745   2
 -10  -4   0 -2.1680  4.5708   3
  10  -4   0 -0.3268  3.8959   1
 -10   4   0 -1.4230  3.7839   3
  10   4   0 0.42635 3.23279   2
  10   4   0 1.37596 3.72919   1
  11  -4   0 13.0530  5.3313   1
 -11  -4   0 0.77302 4.71300   3
  11  -4   0 9.31836 3.95194   2
 -11  -4   0 2.16341 3.30826   6
  11   4   0 5.27576 3.74310   2
  11   4   0 12.5678  4.8162   1
 -11   4   0 0.95456 4.05385   3
  12  -4   0 -2.1460  4.5594   1
 -12  -4   0 -2.5241  4.4039   3
  12   4   0 5.96489 5.38240   1
  12   4   0 4.38223 3.82104   2
 -12   4   0 3.87300 3.98628   3
 -13  -4   0 16.4436  5.6064   3
  13  -4   0 28.4509  6.8099   1
 -13   4   0 13.3997  4.7538   3
 -14  -4   0 2.35640 4.75607   3
 -14   4   0 0.58477 3.91069   3
   0  -5   0 0.19951 0.42770   1
   0   5   0 0.16085 0.20627   1
   0   5   0 -0.0268  0.1964   5
   0   5   0 -0.1307  0.3726   3
  -1  -5   0 1.53557 0.95689   1
   1  -5   0 -0.1686  0.7018   1
  -1   5   0 0.97942 0.69927   3
   1   5   0 3.18764 0.89307   3
  -1   5   0 -0.2616  0.9218   3
   1   5   0 1.08589 0.65687   1
  -2  -5   0 6.99184 2.24494   3
   2  -5   0 -1.2502  1.2740   1
  -2  -5   0 0.09717 1.78906   1
   2   5   0 -0.2158  1.1920   2
   2   5   0 3.29197 1.18448   1
   2   5   0 1.14775 1.59286   3
  -2   5   0 -0.8350  1.4418   3
  -2   5   0 -1.8490  1.3203   3
   3  -5   0 667.809  65.429   1
   3   5   0 651.767  65.311   2
   3   5   0 838.361  66.996   3
   3   5   0 744.247  65.430   1
  -3   5   0 773.758  66.961   3
  -4  -5   0 961.362  79.442   6
   4  -5   0 784.838  77.160   2
   4  -5   0 810.355  77.209   1
  -4  -5   0 935.470  79.359   3
  -4   5   0 841.332  79.026   3
  -4   5   0 874.099  79.014   6
   4   5   0 843.275  77.199   1
  -4   5   0 886.271  78.871   3
   4   5   0 857.080  77.098   2
   4   5   0 878.831  78.993   3
   5  -5   0 12.0635  2.8358   1
  -5  -5   0 8.02390 3.93761   6
   5  -5   0 7.40704 3.11618   2
  -5  -5   0 6.56366 4.15881   3
   5  -5   0 7.01684 3.50046   3
  -5   5   0 7.78923 3.53076   3
   5   5   0 7.14453 2.69382   2
  -5   5   0 7.98187 2.84879   3
   5   5   0 2.07507 2.42323   1
  -5   5   0 9.41016 2.60299   6
   5   5   0 15.6661  3.4746   3
   6  -5   0 272.209  26.930   2
   6  -5   0 288.102  26.929   1
  -6  -5   0 355.240  28.128   6
   6  -5   0 291.840  27.687   3
  -6  -5   0 316.639  28.154   3
   6   5   0 295.020  26.809   2
   6   5   0 297.399  27.611   3
  -6   5   0 299.720  27.676   3
  -6   5   0 288.420  27.153   6
   6   5   0 275.013  26.807   1
  -6   5   0 265.055  27.366   3
  -7  -5   0 0.61485 3.44125   6
  -7  -5   0 1.99922 3.13963   3
   7  -5   0 7.72256 4.01649   3
   7  -5   0 6.11260 2.96971   2
   7  -5   0 2.26164 2.64696   1
  -7  -5   0 8.44197 4.00146   3
  -7   5   0 1.73442 2.16584   6
   7   5   0 7.21392 2.75236   1
   7   5   0 5.70069 3.36499   3
  -7   5   0 5.29355 2.93314   3
   7   5   0 -0.5230  2.3627   2
  -7   5   0 6.93505 3.34067   3
   8  -5   0 2.82225 2.96504   1
  -8  -5   0 2.39038 4.05056   3
  -8  -5   0 1.70806 3.77652   6
   8  -5   0 -0.8217  4.1165   3
   8  -5   0 0.90833 2.80824   2
   8   5   0 5.18035 2.81555   2
   8   5   0 6.03266 2.86892   1
  -8   5   0 -1.0432  3.1634   3
   8   5   0 1.59690 3.84318   3
  -8   5   0 6.79860 3.46498   3
  -9  -5   0 14.2403  5.0264   3
   9  -5   0 7.10152 3.73766   2
  -9  -5   0 18.7878  4.3528   6
   9  -5   0 10.3774  4.0728   1
  -9   5   0 14.1036  4.2797   3
   9   5   0 8.90403 3.51074   2
   9   5   0 7.97059 3.68306   1
  10  -5   0 0.14904 3.51576   2
  10  -5   0 3.77738 4.12140   1
 -10  -5   0 -0.9662  4.5944   3
 -10  -5   0 -2.8321  3.8254   6
 -10   5   0 0.51202 3.70549   3
  10   5   0 0.55018 3.22442   2
  10   5   0 -3.7208  3.7511   1
 -11  -5   0 -2.9769  3.3041   6
  11  -5   0 -4.9909  3.3567   2
 -11  -5   0 -8.2150  4.3057   3
  11  -5   0 1.93989 4.28961   1
 -11   5   0 -6.1583  3.5385   3
  11   5   0 1.22556 3.34814   2
  11   5   0 0.90072 4.29120   1
 -12  -5   0 4.27998 4.70040   3
  12  -5   0 1.45175 4.72035   1
 -12   5   0 7.47666 4.06269   3
  12   5   0 -0.7644  5.0059   1
  12   5   0 1.62934 3.74994   2
  13  -5   0 10.6178  6.0816   1
 -13  -5   0 17.4224  5.6170   3
 -13   5   0 9.48003 4.35407   3
 -14  -5   0 0.03426 4.83247   3
 -14   5   0 2.24699 3.93085   3
   0  -6   0 0.50820 0.62282   1
   0   6   0 0.35591 0.68001   3
   0   6   0 -0.3658  0.2758   5
   0   6   0 -0.4435  0.2484   1
   1  -6   0 75.6479  7.2206   1
  -1  -6   0 79.2241  7.3931   1
   1  -6   0 69.5047  7.1486   1
   1   6   0 85.5661  7.1999   1
   1   6   0 79.1384  7.4926   3
  -1   6   0 80.4165  7.3412   3
  -1   6   0 77.7364  7.4539   3
  -2  -6   0 2.28383 1.87413   1
   2  -6   0 0.57044 1.31226   1
  -2   6   0 0.45669 1.26494   3
   2   6   0 0.47696 1.12174   1
   2   6   0 1.80467 1.64042   3
   2   6   0 -0.2650  1.2837   2
  -2   6   0 1.51263 1.57646   3
   3  -6   0 998.734  84.326   1
   3  -6   0 938.168  84.247   2
  -3  -6   0 882.614  86.456   3
   3   6   0 1030.74   84.30   1
  -3   6   0 974.974  86.112   3
   3   6   0 996.084  86.250   3
  -3   6   0 845.120  86.140   3
   3   6   0 910.813  84.157   2
  -4  -6   0 374.170  34.761   3
  -4  -6   0 337.316  34.703   6
   4  -6   0 408.658  33.670   1
   4  -6   0 398.169  33.687   2
  -4   6   0 353.093  34.204   3
   4   6   0 394.048  33.571   1
   4   6   0 370.960  34.395   3
  -4   6   0 354.358  34.359   3
   4   6   0 364.665  33.517   2
  -5  -6   0 9.44368 4.00403   6
   5  -6   0 4.44589 2.89824   1
  -5  -6   0 12.4100  4.4185   3
   5  -6   0 9.16336 3.28561   2
  -5   6   0 9.27853 3.45251   3
  -5   6   0 6.35410 2.87066   3
   5   6   0 12.9643  2.8213   1
   5   6   0 14.6682  3.0838   2
   5   6   0 10.5480  3.5679   3
   6  -6   0 381.356  36.033   3
   6  -6   0 399.009  35.194   2
  -6  -6   0 391.377  36.465   3
   6  -6   0 368.594  35.165   1
  -6  -6   0 397.571  36.360   6
   6   6   0 360.701  35.918   3
   6   6   0 381.642  34.986   2
   6   6   0 408.789  35.146   1
  -6   6   0 395.223  35.778   3
  -6   6   0 380.455  35.997   3
   7  -6   0 1.16605 2.65461   1
  -7  -6   0 -0.7009  3.8223   3
   7  -6   0 -3.0144  3.6631   3
  -7  -6   0 -1.6140  2.5310   3
  -7  -6   0 4.98316 3.77437   6
   7  -6   0 4.14035 2.88042   2
   7   6   0 0.59623 3.15861   3
   7   6   0 0.31238 2.46583   2
   7   6   0 -0.1591  2.4419   1
  -7   6   0 3.77389 3.07745   3
  -7   6   0 2.89477 2.80188   3
  -8  -6   0 115.597  12.790   6
  -8  -6   0 127.334  13.184   3
   8  -6   0 118.794  12.257   2
   8  -6   0 142.859  12.579   1
   8   6   0 112.694  11.958   2
  -8   6   0 112.170  12.391   3
  -8   6   0 130.458  12.508   3
   8   6   0 108.226  12.045   1
   8   6   0 124.236  12.991   3
  -9  -6   0 -4.9707  3.8003   6
   9  -6   0 -3.2393  3.0207   2
   9  -6   0 0.35254 3.40604   1
  -9  -6   0 1.07639 4.34509   3
   9   6   0 -0.1270  3.0180   2
  -9   6   0 0.52189 3.42365   3
   9   6   0 3.93846 3.32539   1
  10  -6   0 18.1654  4.6630   2
 -10  -6   0 25.5553  6.3338   3
 -10  -6   0 29.2265  5.3061   6
  10  -6   0 33.0440  5.7612   1
  10   6   0 18.5558  5.2156   1
  10   6   0 15.9811  4.3133   2
 -10   6   0 19.7371  4.8193   3
  11  -6   0 -3.6919  3.5403   2
  11  -6   0 -0.9233  4.1559   1
 -11  -6   0 -6.5938  3.5050   6
 -11  -6   0 2.13865 4.86639   3
 -11   6   0 0.80814 3.67188   3
  11   6   0 1.33277 4.40562   1
  11   6   0 2.61680 3.55594   2
 -12  -6   0 8.70969 5.25409   3
  12  -6   0 16.1533  5.5807   1
 -12  -6   0 7.23880 3.81718   6
  12   6   0 15.8555  4.4920   2
  12   6   0 25.5577  6.2206   1
 -12   6   0 17.1621  4.6185   3
  13  -6   0 -4.1744  5.2522   1
 -13  -6   0 5.35897 5.12852   3
 -13   6   0 5.96283 4.04225   3
 -14  -6   0 -4.5279  4.6559   3
   0  -7   0 1.66499 0.96046   1
   0   7   0 -0.6489  0.5375   5
   0   7   0 -0.7211  0.9766   3
   1  -7   0 -0.8617  1.0694   1
  -1  -7   0 0.54467 1.39484   1
   1  -7   0 0.17854 0.84786   1
   1   7   0 -0.1279  0.9419   1
  -1   7   0 -0.1632  1.0660   3
  -1   7   0 -0.6098  1.4358   3
   1   7   0 1.61338 1.31411   3
   2  -7   0 1.36421 1.44505   1
  -2  -7   0 -0.7306  1.8223   1
  -2   7   0 3.85742 1.71169   3
   2   7   0 4.56052 1.31749   1
   2   7   0 6.48963 1.51602   2
  -2   7   0 2.85589 1.36194   3
  -3  -7   0 386.568  35.140   3
   3  -7   0 338.296  34.065   2
   3  -7   0 328.966  34.000   1
  -3   7   0 396.357  34.779   3
   3   7   0 447.267  34.069   1
   4  -7   0 1116.76   97.07   2
  -4  -7   0 1097.41   99.82   6
   4  -7   0 1087.45   97.13   1
  -4  -7   0 1073.97   99.66   3
  -4   7   0 1175.32   99.30   3
   4   7   0 1007.34   97.05   1
   4   7   0 1065.98   99.32   3
  -4   7   0 1139.77   99.18   3
   4   7   0 1041.32   96.93   2
   5  -7   0 146.909  14.347   2
  -5  -7   0 167.362  15.089   6
  -5  -7   0 171.679  15.168   3
   5  -7   0 138.026  14.097   1
   5   7   0 160.259  14.612   3
  -5   7   0 129.690  14.482   3
   5   7   0 137.781  13.959   1
  -5   7   0 140.415  14.236   3
   5   7   0 142.044  13.993   2
  -6  -7   0 36.5727  5.7310   3
   6  -7   0 35.2076  5.0090   3
  -6  -7   0 23.4678  5.1093   6
   6  -7   0 22.7221  4.2496   1
   6  -7   0 23.7598  4.3957   2
   6   7   0 19.9925  4.5297   3
  -6   7   0 30.4518  4.1044   3
  -6   7   0 26.8693  4.4903   3
  -7  -7   0 -4.1120  3.7997   6
   7  -7   0 6.91453 2.88351   2
   7  -7   0 1.56974 2.68114   1
  -7  -7   0 -0.0657  3.7279   3
   7  -7   0 5.74182 3.79644   3
   7   7   0 1.37238 2.56237   1
   7   7   0 -2.2776  2.2975   2
   7   7   0 4.57376 3.33580   3
  -7   7   0 3.58760 2.81997   3
  -7   7   0 4.95319 2.97627   3
  -8  -7   0 20.3808  5.0980   3
   8  -7   0 17.2361  4.0448   2
  -8  -7   0 19.1397  4.6711   6
   8  -7   0 16.1908  4.0531   1
  -8   7   0 23.1227  4.2377   3
   8   7   0 21.3075  3.7679   2
   8   7   0 10.9461  4.4523   3
  -8   7   0 13.7232  3.8503   3
   8   7   0 20.3910  4.0212   1
   9  -7   0 11.7920  4.0297   1
  -9  -7   0 -2.8823  4.1541   6
  -9  -7   0 9.51461 4.97826   3
   9  -7   0 5.38329 3.51112   2
  -9   7   0 1.84432 3.41008   3
   9   7   0 5.14329 3.58960   1
   9   7   0 5.35750 3.17894   2
 -10  -7   0 10.8874  5.4184   3
 -10  -7   0 11.5399  4.6965   6
  10  -7   0 8.13504 4.15759   2
  10  -7   0 13.5777  4.6578   1
  10   7   0 13.8585  3.8459   2
 -10   7   0 18.8404  4.3979   3
  10   7   0 11.7708  4.5109   1
  11  -7   0 19.4998  5.2761   1
 -11  -7   0 20.6494  4.7535   6
 -11  -7   0 7.74157 5.33129   3
  11   7   0 3.97267 3.73463   2
  11   7   0 14.2342  5.2114   1
 -11   7   0 15.2463  4.2891   3
 -12  -7   0 5.16563 3.95519   6
 -12  -7   0 26.4995  6.2523   3
  12  -7   0 15.6304  5.7120   1
 -12   7   0 20.3239  4.6490   3
  12   7   0 16.5982  4.5312   2
  12   7   0 15.4850  5.6483   1
  13  -7   0 4.61014 5.34296   1
 -13  -7   0 -0.2488  4.8255   3
 -13   7   0 3.31216 3.75770   3
   0  -8   0 1007.63   93.42   1
   0   8   0 1090.95   95.54   3
   0   8   0 1058.57   93.92   5
   1  -8   0 -0.1132  1.1869   1
  -1  -8   0 -2.0666  1.4430   1
   1  -8   0 -1.1228  0.8608   1
   1   8   0 -0.6463  1.0027   1
   1   8   0 0.39747 1.37527   3
  -1   8   0 0.41550 1.52538   3
  -1   8   0 -1.4644  1.1743   3
  -2  -8   0 117.337  11.451   1
   2  -8   0 98.0412 11.1289   1
  -2   8   0 126.032  11.436   3
   2   8   0 120.122  11.161   2
   2   8   0 140.331  11.169   1
   2   8   0 135.066  11.583   3
  -2   8   0 113.361  11.327   3
  -3  -8   0 20.2254  3.4494   1
  -3  -8   0 25.6698  3.6857   3
   3  -8   0 17.8572  2.8233   1
   3   8   0 28.0612  3.0090   1
   3   8   0 27.6657  3.0879   2
   3   8   0 26.5101  3.1196   3
  -3   8   0 16.3070  2.7333   3
  -3   8   0 19.3455  2.7995   3
  -4  -8   0 469.382  46.637   6
  -4  -8   0 503.360  46.678   3
   4  -8   0 552.016  45.358   2
   4  -8   0 511.129  45.269   1
   4   8   0 476.653  46.305   3
  -4   8   0 465.210  46.172   3
  -4   8   0 493.872  46.116   3
   4   8   0 506.317  45.167   2
   4   8   0 565.881  45.286   1
  -5  -8   0 285.201  27.069   3
  -5  -8   0 257.116  26.953   6
   5  -8   0 288.449  25.916   1
   5  -8   0 305.746  26.049   2
  -5   8   0 271.477  26.285   3
  -5   8   0 257.218  26.397   3
   5   8   0 302.921  25.822   2
   5   8   0 271.234  26.546   3
   5   8   0 299.272  25.856   1
   6  -8   0 10.3882  3.5707   2
  -6  -8   0 7.87356 4.10827   6
  -6  -8   0 8.40383 4.34599   3
   6  -8   0 5.12463 3.07527   1
  -6   8   0 9.54676 2.95500   3
   6   8   0 8.30931 2.87118   2
  -6   8   0 3.80879 3.13566   3
   6   8   0 9.07345 2.76156   1
   6   8   0 13.7680  3.8674   3
   7  -8   0 36.7572  5.0404   2
   7  -8   0 29.2670  5.6152   3
  -7  -8   0 31.3772  6.0263   3
  -7  -8   0 28.2559  5.7245   6
   7  -8   0 29.6271  4.8120   1
   7   8   0 32.9670  5.3662   3
   7   8   0 32.7720  4.7229   2
  -7   8   0 39.7909  4.8089   3
  -7   8   0 33.7591  5.0079   3
   7   8   0 33.3226  4.8322   1
   8  -8   0 0.12654 2.84477   1
   8  -8   0 2.41337 3.21559   2
  -8  -8   0 -0.0725  4.0779   6
  -8  -8   0 3.23999 4.18252   3
   8   8   0 3.85105 3.04153   1
  -8   8   0 0.86975 3.05338   3
   8   8   0 -0.1570  2.7208   2
   8   8   0 -4.4011  3.7359   3
  -8   8   0 1.15572 3.04073   3
  -9  -8   0 38.2516  6.5187   3
   9  -8   0 31.3641  5.2865   2
   9  -8   0 29.1528  5.4565   1
  -9  -8   0 29.2401  6.1281   6
   9   8   0 30.2180  5.5217   1
   9   8   0 34.3573  5.0767   2
  -9   8   0 26.0515  4.9700   3
 -10  -8   0 1.90531 4.43711   6
  10  -8   0 -0.4441  3.9013   1
 -10  -8   0 4.71060 5.09002   3
  10  -8   0 2.75563 3.72256   2
 -10   8   0 3.18466 3.57242   3
  10   8   0 9.18144 4.32010   1
  10   8   0 -3.4925  3.1152   2
 -11  -8   0 21.9589  6.7082   3
 -11  -8   0 27.8210  5.8781   6
  11  -8   0 52.7931  7.2154   1
 -11   8   0 26.7324  5.3223   3
  11   8   0 33.8769  6.5692   1
  11   8   0 35.0109  5.5226   2
 -12  -8   0 -1.8250  3.6570   6
  12  -8   0 4.17471 4.92611   1
 -12  -8   0 -2.9143  4.5698   3
  12   8   0 0.16082 3.57143   2
 -12   8   0 1.70265 3.66397   3
 -13  -8   0 2.24294 5.18776   3
  13  -8   0 -0.3002  5.2490   1
 -13   8   0 2.11691 3.71581   3
   0  -9   0 4.92384 1.42124   1
   0   9   0 5.88504 1.30125   5
   1  -9   0 27.6624  2.5593   1
  -1  -9   0 18.2408  2.7116   1
   1  -9   0 16.0226  2.5053   1
  -2  -9   0 16.4781  3.5087   1
   2   9   0 33.7118  3.8855   3
   2   9   0 35.0605  3.4694   1
  -2   9   0 27.6770  3.4595   3
  -2   9   0 37.5476  3.6844   3
  -3  -9   0 4.54846 2.20424   1
   3  -9   0 -1.3669  1.3560   1
   3   9   0 1.51166 1.25660   1
   3   9   0 1.48846 2.50220   6
   3   9   0 0.59730 1.71217   3
  -3   9   0 0.97470 1.31282   3
  -3   9   0 2.03597 1.57715   3
   3   9   0 -1.1016  1.3039   2
   4  -9   0 353.604  34.486   1
   4  -9   0 381.897  34.620   2
  -4  -9   0 433.872  35.835   3
   4   9   0 374.064  35.347   3
   4   9   0 354.386  34.418   1
  -4   9   0 409.844  35.150   3
  -4   9   0 375.877  35.186   3
   4   9   0 386.924  34.436   2
  -5  -9   0 400.784  39.241   3
   5  -9   0 403.483  37.860   1
   5  -9   0 456.099  38.044   2
  -5  -9   0 437.322  39.285   6
  -5   9   0 438.546  38.518   3
   5   9   0 368.015  38.693   3
   5   9   0 398.587  37.772   1
   5   9   0 395.809  37.716   2
  -5   9   0 468.162  38.685   3
   6  -9   0 104.199  12.653   2
  -6  -9   0 144.595  13.583   3
   6  -9   0 134.933  12.609   1
  -6  -9   0 153.014  13.706   6
   6   9   0 134.873  12.404   2
  -6   9   0 121.530  12.650   3
   6   9   0 122.778  12.350   1
   6   9   0 122.126  13.043   3
  -6   9   0 116.540  12.548   3
  -7  -9   0 6.08328 4.11903   6
  -7  -9   0 3.56235 4.09678   3
   7  -9   0 11.1544  3.1164   1
   7  -9   0 8.16418 3.96070   3
   7  -9   0 9.40046 3.23383   2
   7   9   0 6.23923 2.76360   1
   7   9   0 6.14195 2.68757   2
   7   9   0 5.08628 3.43614   3
  -7   9   0 7.56941 2.95221   3
  -7   9   0 6.93652 2.92878   3
   8  -9   0 6.01370 3.43580   2
  -8  -9   0 7.56022 4.64041   6
   8  -9   0 10.0111  3.4397   1
  -8  -9   0 0.50025 4.16306   3
  -8   9   0 14.7443  3.3772   3
   8   9   0 10.5619  4.0951   3
   8   9   0 3.24567 2.76083   2
  -8   9   0 3.67402 3.21657   3
   8   9   0 10.4374  3.3056   1
   9  -9   0 8.31862 3.73275   1
   9  -9   0 11.4953  3.9498   2
  -9  -9   0 -0.5945  4.4838   6
  -9  -9   0 5.81784 4.76910   3
   9   9   0 6.18241 3.61039   1
   9   9   0 1.79758 3.03291   2
  -9   9   0 9.84561 3.53619   3
 -10  -9   0 6.57103 5.34367   3
  10  -9   0 -3.3087  3.5109   2
  10  -9   0 2.64113 4.00794   1
 -10  -9   0 0.43411 4.58197   6
 -10   9   0 -2.1539  3.3024   3
  10   9   0 5.82319 4.07495   1
  10   9   0 0.63167 3.26789   2
  11  -9   0 7.09164 4.49328   1
 -11  -9   0 0.69704 4.36190   6
 -11  -9   0 7.50081 5.52180   3
 -11   9   0 -4.2441  3.3568   3
  11   9   0 0.17566 3.36224   2
  11   9   0 1.10494 4.60859   1
 -12  -9   0 7.68320 5.37628   3
 -12  -9   0 3.78300 4.20243   6
  12  -9   0 2.79976 4.77248   1
  12   9   0 3.17874 3.88810   2
 -12   9   0 0.06874 3.60782   3
  13  -9   0 3.93624 5.37683   1
 -13  -9   0 2.25239 5.29543   3
 -13   9   0 2.68456 3.62314   3
   0 -10   0 0.04347 1.31335   1
   0  10   0 -0.7937  1.1270   5
   0  10   0 2.10163 1.47020   3
  -1 -10   0 1772.10  161.87   1
   1 -10   0 1793.05  161.74   1
   1 -10   0 1830.38  161.79   1
  -1  10   0 1821.14  165.40   3
   1  10   0 1820.02  165.47   3
  -1  10   0 1890.93  165.44   3
   1  10   0 1838.48  161.78   1
  -2 -10   0 1.91908 1.74735   1
   2 -10   0 0.08111 1.28537   1
   2  10   0 1.33174 1.59118   3
  -2  10   0 3.33825 1.69467   3
   2  10   0 1.25738 1.16089   1
  -2  10   0 0.72784 1.15363   3
  -3 -10   0 33.6480  4.1423   1
   3 -10   0 28.6123  3.4267   1
  -3  10   0 26.0473  3.3345   3
   3  10   0 27.8210  3.3679   1
  -3  10   0 24.4949  3.1761   3
   3  10   0 24.1381  3.5688   3
   3  10   0 29.4982  3.4868   2
  -4 -10   0 21.6940  4.4004   3
   4 -10   0 18.6067  3.6592   2
  -4 -10   0 23.0579  4.0765   1
   4 -10   0 16.5800  3.2045   1
   4  10   0 27.2041  3.2037   1
   4  10   0 20.9844  3.6214   3
  -4  10   0 20.9878  3.1905   3
   4  10   0 18.7056  4.5087   6
   4  10   0 20.0778  3.1977   2
  -4  10   0 18.6949  3.0544   3
  -5 -10   0 145.037  13.765   3
   5 -10   0 141.062  12.707   1
  -5 -10   0 120.093  13.748   6
   5 -10   0 155.441  13.166   2
   5  10   0 99.5355 13.1796   3
  -5  10   0 123.024  12.759   3
  -5  10   0 111.950  12.653   3
   5  10   0 106.912  14.279   6
   5  10   0 147.528  12.519   1
   5  10   0 135.865  12.521   2
   6 -10   0 308.420  27.162   2
  -6 -10   0 284.645  28.172   3
  -6 -10   0 315.147  28.195   6
   6 -10   0 302.224  27.058   1
   6  10   0 279.062  26.900   1
   6  10   0 281.131  27.701   3
  -6  10   0 297.304  27.439   3
   6  10   0 291.701  26.845   2
  -6  10   0 286.490  27.315   3
   7 -10   0 0.06221 3.79497   3
  -7 -10   0 -6.4978  3.5274   3
   7 -10   0 -0.0091  2.5704   1
   7 -10   0 -0.8599  2.8056   2
  -7 -10   0 -4.4522  3.8733   6
   7  10   0 0.12941 2.46383   1
  -7  10   0 -1.4993  2.6778   3
   7  10   0 -1.1666  2.2866   2
  -7  10   0 0.38528 2.50143   3
   7  10   0 -3.9463  3.0934   3
   8 -10   0 143.278  14.914   2
   8 -10   0 149.731  14.958   1
  -8 -10   0 163.281  16.043   3
  -8 -10   0 155.432  15.877   6
  -8  10   0 144.924  14.811   3
   8  10   0 151.491  14.611   2
   8  10   0 169.651  15.045   1
  -8  10   0 150.970  15.014   3
   8  10   0 132.567  15.444   3
   9 -10   0 -1.9905  3.3964   1
  -9 -10   0 12.4652  5.2907   3
   9 -10   0 -0.5124  3.5075   2
  -9 -10   0 8.85599 4.87860   6
  -9  10   0 7.66646 3.37339   3
   9  10   0 0.06549 3.23876   1
   9  10   0 -0.5352  2.9071   2
  10 -10   0 58.5040  7.8556   1
 -10 -10   0 74.1658  8.6235   6
  10 -10   0 49.6467  7.1908   2
 -10 -10   0 49.3546  8.6352   3
  10  10   0 47.7169  6.8955   2
 -10  10   0 55.0331  7.0110   3
  10  10   0 51.4183  7.6448   1
 -11 -10   0 2.12915 4.65114   6
 -11 -10   0 16.1587  5.9339   3
  11 -10   0 -0.0842  4.2537   1
  11  10   0 7.52301 4.93788   1
 -11  10   0 2.97288 3.50234   3
  11  10   0 6.31886 3.59899   2
 -12 -10   0 -2.9734  5.1783   3
 -12 -10   0 0.67907 4.41125   6
  12 -10   0 3.25782 4.90861   1
  12  10   0 3.02136 3.81759   2
 -12  10   0 0.18137 3.45859   3
 -13 -10   0 -3.3307  5.3272   3
  13 -10   0 -1.1580  5.1172   1
 -13  10   0 -0.0936  3.2900   3
   0 -11   0 -0.6496  1.3425   1
   0  11   0 -3.4223  1.1258   5
   0  11   0 -1.3648  1.4708   3
  -1 -11   0 73.7004  7.7701   1
   1 -11   0 61.8487  7.5854   1
   1 -11   0 85.9011  7.5660   1
  -1  11   0 82.2079  7.9341   3
   1  11   0 97.3258  7.6319   1
  -2 -11   0 0.52136 1.67514   1
   2 -11   0 1.38702 1.39123   1
  -2  11   0 1.75654 1.67266   3
   2  11   0 2.75690 1.68050   3
   2  11   0 2.94907 1.26265   1
  -2  11   0 1.37008 1.25545   3
  -3 -11   0 22.1994  3.6814   1
   3 -11   0 18.2936  3.1312   1
  -3  11   0 28.3302  3.3338   3
   3  11   0 25.7499  3.4748   3
   3  11   0 27.8470  3.3193   1
   3  11   0 27.8796  3.4295   2
  -3  11   0 28.2460  3.5616   3
  -4 -11   0 10.7730  3.5812   1
   4 -11   0 9.48890 2.66427   1
  -4 -11   0 4.26039 3.60626   3
  -4  11   0 9.08581 2.39342   3
  -4  11   0 12.1006  2.6680   3
   4  11   0 7.74705 3.97138   6
   4  11   0 11.1165  2.6222   2
   4  11   0 14.3084  3.1268   3
   4  11   0 8.61055 2.35766   1
  -5 -11   0 469.922  38.288   3
  -5 -11   0 480.205  38.264   6
   5 -11   0 388.683  36.743   1
   5 -11   0 370.103  36.800   2
   5  11   0 387.754  36.617   2
  -5  11   0 400.105  37.392   3
   5  11   0 446.717  38.365   6
   5  11   0 375.387  36.638   1
  -5  11   0 388.964  37.338   3
   5  11   0 392.282  37.668   3
   6 -11   0 90.2578  9.9136   1
  -6 -11   0 102.776  11.208   6
   6 -11   0 101.002  10.231   2
  -6 -11   0 91.6230 10.9821   3
   6  11   0 101.876  12.097   6
   6  11   0 95.1647  9.7410   2
  -6  11   0 99.0622  9.9334   3
   6  11   0 94.4647  9.8652   1
   6  11   0 84.4068 10.4452   3
  -6  11   0 101.129   9.941   3
   7 -11   0 10.8510  3.3278   2
  -7 -11   0 7.77941 4.27552   6
   7 -11   0 5.70679 2.96768   1
  -7 -11   0 11.2644  4.2871   3
  -7  11   0 3.81333 2.61381   3
   7  11   0 5.02573 2.71990   1
   7  11   0 3.67577 3.41173   3
  -7  11   0 5.28748 2.84388   3
   7  11   0 3.28533 2.49337   2
   7  11   0 -0.6153  4.8905   6
   8 -11   0 5.18037 3.53588   2
  -8 -11   0 13.0591  4.7775   3
   8 -11   0 3.25205 3.17480   1
  -8 -11   0 9.47775 4.81521   6
   8  11   0 5.33772 3.04571   2
   8  11   0 7.56985 4.18591   3
  -8  11   0 5.26478 3.30316   3
  -8  11   0 5.18718 2.95599   3
   8  11   0 5.21404 3.30988   1
  -9 -11   0 5.60072 5.10141   6
   9 -11   0 0.86858 3.63501   2
   9 -11   0 2.12885 3.51679   1
  -9 -11   0 0.47557 4.77187   3
   9  11   0 3.34299 3.10943   2
  -9  11   0 4.93534 3.13428   3
   9  11   0 4.96006 3.57588   1
  10 -11   0 28.7473  5.2261   2
  10 -11   0 33.9819  5.9111   1
 -10 -11   0 31.9180  6.6746   3
 -10 -11   0 34.9291  6.4863   6
  10  11   0 21.6146  4.7522   2
 -10  11   0 20.4892  4.6693   3
  10  11   0 24.1200  5.5083   1
 -11 -11   0 98.4971 12.1284   3
 -11 -11   0 86.9566 11.2640   6
  11 -11   0 97.1159 11.2716   1
 -11  11   0 100.258  10.159   3
  11  11   0 89.5100 11.4842   1
  11  11   0 87.5236 10.3314   2
 -12 -11   0 -2.1952  4.4722   6
  12 -11   0 9.70654 5.14046   1
 -12 -11   0 -4.8544  5.0277   3
 -12  11   0 -1.0408  3.2430   3
  12  11   0 3.10688 3.88859   2
  13 -11   0 4.44008 5.57209   1
 -13 -11   0 4.53816 4.06869   6
 -13 -11   0 1.19613 5.65351   3
 -13  11   0 10.0164  3.5724   3
   0 -12   0 259.566  22.760   1
   0  12   0 260.345  23.273   3
   0  12   0 237.746  22.746   5
   1 -12   0 3.69130 1.44918   1
   1 -12   0 3.26139 1.12046   1
  -1 -12   0 0.94066 1.56434   1
   1 -12   0 1.05687 1.32863   5
  -1  12   0 4.48787 1.85658   3
  -1  12   0 3.88303 1.44705   3
   1  12   0 2.14374 1.61517   3
   1  12   0 2.90017 1.22424   1
   2 -12   0 50.4151  5.0288   1
   2 -12   0 46.7062  5.1687   1
  -2 -12   0 52.2178  5.4187   1
  -2  12   0 51.0529  5.3175   3
   2  12   0 45.6330  4.9837   1
  -2  12   0 50.4970  5.1332   3
   2  12   0 52.2482  5.4822   3
  -3 -12   0 10.2242  2.6330   1
   3 -12   0 5.95032 1.90407   1
   3  12   0 11.1078  1.8876   1
  -3  12   0 4.75346 1.65070   3
   3  12   0 8.47298 2.24040   3
  -3  12   0 5.29582 2.09092   3
  -4 -12   0 40.3168  5.7698   3
   4 -12   0 33.8352  4.7029   1
  -4 -12   0 36.6790  5.5397   1
   4  12   0 32.0372  4.9644   3
   4  12   0 43.2748  4.6119   1
  -4  12   0 38.9196  4.5542   3
  -4  12   0 31.4695  4.2916   3
   4  12   0 36.2567  4.6014   2
   5 -12   0 407.278  38.385   1
  -5 -12   0 435.633  39.857   3
  -5 -12   0 406.465  39.774   6
   5 -12   0 470.775  38.584   2
   5  12   0 404.519  40.004   6
  -5  12   0 434.158  39.054   3
   5  12   0 406.031  39.380   3
   5  12   0 430.270  38.309   2
   5  12   0 439.187  38.383   1
  -5  12   0 405.728  38.984   3
   6 -12   0 16.7889  3.6971   2
   6 -12   0 14.8040  3.5961   1
  -6 -12   0 16.8672  4.9005   6
  -6 -12   0 14.3678  4.7411   3
  -6  12   0 20.2630  3.3935   3
   6  12   0 19.8158  3.4170   1
   6  12   0 13.6064  5.4719   6
   6  12   0 14.5159  3.1998   2
   6  12   0 15.0885  4.0606   3
  -6  12   0 11.9607  3.1515   3
  -7 -12   0 29.7151  5.8025   6
   7 -12   0 25.5428  4.6422   1
   7 -12   0 36.1593  5.0890   2
  -7 -12   0 34.7159  5.9622   3
   7  12   0 33.7918  7.0668   6
   7  12   0 27.2006  5.1952   3
   7  12   0 28.2786  4.4375   2
  -7  12   0 28.9873  4.4275   3
   7  12   0 36.9081  4.9098   1
  -7  12   0 32.7912  4.4421   3
   8 -12   0 2.39355 3.13433   1
  -8 -12   0 4.00445 4.80477   6
   8 -12   0 0.56135 3.41412   2
  -8 -12   0 2.17765 4.41698   3
  -8  12   0 0.70628 2.75054   3
   8  12   0 1.90531 2.96422   1
   8  12   0 0.64536 4.03919   3
   8  12   0 3.94485 2.85485   2
  -8  12   0 3.98206 3.18704   3
   9 -12   0 110.530  11.629   1
   9 -12   0 100.254  11.570   2
  -9 -12   0 105.160  12.794   6
  -9 -12   0 112.262  12.634   3
  -9  12   0 102.994  11.499   3
  -9  12   0 106.494  11.132   3
   9  12   0 112.715  11.181   2
   9  12   0 105.981  12.381   3
   9  12   0 106.972  11.689   1
 -10 -12   0 2.42317 5.04828   3
  10 -12   0 -0.8172  3.8980   1
 -10 -12   0 3.11723 5.08312   6
  10 -12   0 0.93208 3.93972   2
  10  12   0 3.10978 4.08716   1
  10  12   0 4.75030 3.40432   2
 -10  12   0 2.71644 3.24750   3
 -11 -12   0 282.959  28.698   6
  11 -12   0 334.574  28.432   1
 -11 -12   0 298.151  29.367   3
 -11  12   0 282.222  27.801   3
  11  12   0 298.634  28.308   1
  11  12   0 286.988  27.648   2
  12 -12   0 8.29760 5.04420   1
 -12 -12   0 2.10377 5.40434   3
 -12 -12   0 -2.7242  4.6761   6
 -12  12   0 -1.7432  3.0546   3
  12  12   0 1.58951 3.96661   2
 -13 -12   0 3.14739 4.41379   6
 -13 -12   0 1.54408 5.57650   3
  13 -12   0 3.69616 5.51481   1
   0 -13   0 2.57652 1.43831   1
   0  13   0 2.50771 1.32633   5
   0  13   0 6.53654 1.66005   3
  -1 -13   0 0.37611 1.57044   1
   1 -13   0 -0.5605  1.2752   1
   1 -13   0 0.36830 0.96811   1
   1 -13   0 1.11822 1.28245   5
   1  13   0 2.84190 1.56028   3
  -1  13   0 3.38135 1.78763   3
  -1  13   0 4.00791 1.41793   3
   1  13   0 2.09620 1.19009   1
  -2 -13   0 8.18808 2.18664   1
   2 -13   0 5.57362 1.77386   1
   2 -13   0 8.92188 1.64673   1
  -2  13   0 9.34021 1.75599   3
   2  13   0 12.7495  1.8717   1
  -2  13   0 6.76501 2.07678   3
   2  13   0 12.8387  2.1993   3
   3 -13   0 115.800  12.633   1
  -3 -13   0 129.107  13.065   1
   3  13   0 131.500  12.631   1
  -3  13   0 156.074  12.945   3
   3  13   0 141.375  13.154   3
  -3  13   0 137.834  12.767   3
  -4 -13   0 118.209  12.815   1
   4 -13   0 145.531  12.424   1
   4  13   0 130.859  12.290   2
  -4  13   0 127.920  12.429   3
   4  13   0 123.917  12.877   3
   4  13   0 120.264  12.158   1
  -4  13   0 119.778  12.305   3
  -5 -13   0 444.242  41.741   6
   5 -13   0 413.300  40.259   1
  -5 -13   0 423.847  41.687   3
   5 -13   0 453.300  40.390   2
   5  13   0 414.568  41.303   3
   5  13   0 418.860  40.222   1
  -5  13   0 474.734  40.968   3
   5  13   0 499.560  42.001   6
   5  13   0 432.099  40.200   2
  -5  13   0 481.375  40.992   3
  -6 -13   0 45.2507  6.7826   3
   6 -13   0 41.6351  5.8457   2
   6 -13   0 48.5283  5.8022   1
  -6 -13   0 54.3156  7.0217   6
   6  13   0 41.8577  7.2912   6
  -6  13   0 45.7644  5.8096   3
   6  13   0 40.4854  5.3939   2
  -6  13   0 36.2162  5.1111   3
   6  13   0 48.3407  6.1511   3
   6  13   0 46.1059  5.5971   1
  -7 -13   0 1.62741 4.38975   6
   7 -13   0 -0.2146  3.0365   2
   7 -13   0 -1.7109  2.5659   1
  -7 -13   0 -3.7537  3.6359   3
   7  13   0 2.43194 2.44395   2
   7  13   0 1.54430 3.58109   3
  -7  13   0 -1.4862  2.5450   3
   7  13   0 6.57653 5.51213   6
   7  13   0 -0.4273  2.5418   1
  -7  13   0 2.31455 2.46719   3
  -8 -13   0 24.6308  5.5577   6
  -8 -13   0 12.2525  5.0671   3
   8 -13   0 20.0663  4.2737   2
   8  13   0 16.1025  3.7327   1
  -8  13   0 8.14957 3.53154   3
  -9 -13   0 17.0983  5.7841   6
   9 -13   0 4.23373 3.78764   1
  -9 -13   0 14.9792  5.4267   3
   9 -13   0 6.32186 3.98679   2
   9  13   0 -3.4498  4.6985   3
   9  13   0 6.54822 3.37784   2
   9  13   0 10.1183  4.1129   1
  -9  13   0 8.49407 3.73049   3
  -9  13   0 8.30280 3.32259   3
 -10 -13   0 -2.2288  5.0728   3
  10 -13   0 4.18188 3.98834   1
  10 -13   0 8.48545 4.30604   2
 -10 -13   0 -1.7829  5.1706   6
  10  13   0 -0.3225  3.1172   2
 -10  13   0 3.75230 3.22415   3
  10  13   0 2.48327 4.10433   1
 -11 -13   0 125.544  13.963   3
  11 -13   0 112.210  12.964   1
 -11  13   0 111.722  11.965   3
  11  13   0 122.480  12.437   2
 -12 -13   0 9.62005 5.97379   3
  12 -13   0 10.5893  5.4927   1
 -12 -13   0 10.4540  5.4227   6
 -12  13   0 11.3948  3.5231   3
  12  13   0 15.7390  4.6321   2
 -13 -13   0 5.06576 4.81236   6
  13 -13   0 -3.5415  5.0993   1
 -13 -13   0 7.40197 5.78824   3
   0 -14   0 1.49685 1.44813   1
   0  14   0 1.53280 1.49572   3
   0  14   0 1.37977 1.31905   5
   1 -14   0 123.624  12.249   1
  -1 -14   0 132.153  12.345   1
   1 -14   0 139.182  12.246   5
  -1  14   0 128.262  12.467   3
   1  14   0 129.637  12.638   3
   1  14   0 136.622  12.208   1
  -1  14   0 136.455  12.607   3
   2 -14   0 1.81898 1.26053   1
   2 -14   0 3.09797 1.65491   1
  -2 -14   0 4.51908 1.90725   1
   2  14   0 3.66316 1.40440   1
  -2  14   0 1.89039 1.44145   3
  -2  14   0 4.71262 1.98987   3
   2  14   0 3.56431 1.83925   3
  -3 -14   0 595.576  54.248   1
   3 -14   0 598.396  53.960   1
  -3  14   0 589.355  55.044   3
   3  14   0 666.490  53.973   1
  -3  14   0 575.163  54.997   3
   3  14   0 595.403  55.242   3
  -4 -14   0 66.7484  7.7963   1
   4 -14   0 62.5994  7.1015   1
   4  14   0 61.0127  7.8160   3
  -4  14   0 61.9178  6.8473   3
  -4  14   0 58.1314  7.0272   3
   4  14   0 64.4590  6.7458   1
   5 -14   0 74.8851  8.3643   1
   5 -14   0 83.5984  8.8290   2
  -5 -14   0 77.8194  9.6793   6
  -5 -14   0 85.2493  9.3508   1
  -5 -14   0 68.6109  9.2653   3
  -5  14   0 75.9199  8.2277   3
   5  14   0 80.3849  8.2388   2
   5  14   0 74.3382  8.8971   3
   5  14   0 75.6839  8.1888   1
  -5  14   0 72.8735  8.0774   3
  -6 -14   0 75.1662  9.1806   3
  -6 -14   0 75.3247  9.5375   6
   6 -14   0 82.6493  8.2130   1
   6 -14   0 65.6769  8.6121   2
   6  14   0 68.7484  8.0121   2
  -6  14   0 75.7194  8.0842   3
  -6  14   0 69.3748  7.8878   3
   6  14   0 78.9469  8.2253   1
   6  14   0 88.5369 10.4291   6
   6  14   0 80.3112  8.7451   3
   7 -14   0 -1.4914  2.6258   1
  -7 -14   0 3.84978 4.20726   3
   7 -14   0 -0.1819  2.9622   2
  -7 -14   0 -1.6087  4.4322   6
   7  14   0 -2.8136  3.4040   3
   7  14   0 4.27584 2.70640   1
   7  14   0 3.29714 2.67788   2
  -7  14   0 0.73727 2.25825   3
   7  14   0 0.68236 5.66572   6
  -7  14   0 -0.1645  2.6090   3
   8 -14   0 745.798  65.734   2
  -8 -14   0 734.532  67.807   6
   8 -14   0 749.573  65.864   1
  -8 -14   0 719.951  67.899   3
   8  14   0 660.633  67.267   3
  -8  14   0 755.344  66.826   3
   8  14   0 708.585  65.558   2
  -8  14   0 771.995  66.862   3
   8  14   0 708.233  65.736   1
   9 -14   0 -0.3945  3.5852   1
  -9 -14   0 0.87739 5.38061   6
  -9 -14   0 1.55510 4.75436   3
   9 -14   0 6.37380 4.02898   2
   9  14   0 -0.8904  3.0530   2
  -9  14   0 -0.7539  3.4084   3
   9  14   0 -0.3864  4.7652   3
   9  14   0 0.82170 3.73457   1
  -9  14   0 5.20701 3.02037   3
  10 -14   0 25.4557  5.6180   1
 -10 -14   0 34.2417  7.3137   3
  10 -14   0 15.5030  5.2427   2
  10  14   0 27.8794  5.0487   2
  10  14   0 28.6276  5.9310   1
 -10  14   0 34.3457  4.7920   3
 -11 -14   0 21.9773  6.3544   3
  11 -14   0 9.99201 4.94071   1
  11  14   0 17.9102  4.6870   2
 -11  14   0 22.2280  4.0660   3
 -12 -14   0 37.1222  7.8439   3
  12 -14   0 40.2474  7.3151   1
 -12  14   0 32.8496  4.9902   3
 -13 -14   0 1.20919 4.82431   6
 -13 -14   0 4.47877 5.88487   3
  13 -14   0 0.74671 5.30476   1
   0 -15   0 -0.7324  1.3901   1
   0  15   0 -1.3217  1.2056   5
   0  15   0 1.26923 1.50018   3
  -1 -15   0 5.46682 1.87906   1
   1 -15   0 3.19085 1.56731   1
   1 -15   0 3.41094 1.51447   5
  -1  15   0 3.55584 1.98581   3
   1  15   0 7.17264 1.54868   1
  -1  15   0 8.05892 1.70422   3
   1  15   0 6.31355 1.81208   3
   2 -15   0 62.3538  6.4641   1
  -2 -15   0 52.5467  6.6896   1
  -2  15   0 79.7073  6.8936   3
   2  15   0 61.2975  6.5081   1
   2  15   0 73.8268  7.0932   3
  -2  15   0 67.9117  6.6613   3
   3 -15   0 635.229  63.508   1
  -3 -15   0 700.458  63.858   1
   3  15   0 673.709  63.502   1
  -3  15   0 768.517  64.873   3
  -3  15   0 761.043  64.851   3
   3  15   0 723.628  65.087   3
  -4 -15   0 148.591  16.547   1
   4 -15   0 165.813  16.120   1
  -4  15   0 186.550  16.385   3
   4  15   0 174.903  16.108   1
  -4  15   0 177.250  16.225   3
   4  15   0 161.983  16.823   3
  -5 -15   0 68.9113  8.1836   3
  -5 -15   0 69.9678  8.3138   1
   5 -15   0 54.4530  7.0369   1
  -5  15   0 61.6208  6.8028   3
   5  15   0 55.1459  6.7573   1
   5  15   0 60.9830  7.6937   3
  -5  15   0 67.7219  7.0212   3
   6 -15   0 14.5139  3.9727   1
  -6 -15   0 34.2969  5.7607   6
   6 -15   0 34.0441  4.7281   2
  -6 -15   0 22.3226  5.2578   3
   6  15   0 22.0613  4.0091   1
   6  15   0 32.1042  6.1465   6
   6  15   0 28.9601  4.7317   3
  -6  15   0 31.3218  3.9022   3
  -6  15   0 27.2767  3.7597   3
   6  15   0 22.8830  4.0058   2
   7 -15   0 21.8107  4.2245   2
  -7 -15   0 27.9306  5.7299   6
   7 -15   0 23.5611  4.0617   1
  -7 -15   0 16.7947  5.0111   3
   7  15   0 16.5126  6.1125   6
  -7  15   0 8.64556 3.19549   3
   7  15   0 23.8096  4.6153   3
   7  15   0 20.1769  3.6245   2
   7  15   0 14.0344  3.6649   1
  -7  15   0 14.6957  3.0733   3
  -8 -15   0 89.5615  9.6503   3
   8 -15   0 72.8877  8.7837   2
  -8 -15   0 102.739  10.216   6
   8 -15   0 78.2582  8.3505   1
  -8  15   0 66.5298  8.0175   3
  -8  15   0 69.5669  7.7489   3
   8  15   0 35.7226  8.1714   3
   8  15   0 64.1090  8.2236   1
   9 -15   0 1.59229 3.79635   1
   9 -15   0 1.76665 3.88362   2
  -9 -15   0 1.91407 4.90267   3
   9  15   0 19.0343  5.5872   3
  -9  15   0 6.18144 3.56916   3
   9  15   0 5.04902 3.35077   2
  -9  15   0 -1.0393  2.7007   3
   9  15   0 6.51910 3.99169   1
 -10 -15   0 0.23028 5.37926   3
  10 -15   0 7.32039 4.30664   1
  10  15   0 5.78201 3.58072   2
  10  15   0 0.79081 4.24789   1
 -10  15   0 2.26211 2.97691   3
  11 -15   0 51.7785  7.7695   1
 -11 -15   0 41.7225  8.4378   3
 -11  15   0 49.3209  6.1593   3
  12 -15   0 59.3937  9.1027   1
 -12 -15   0 65.4286 10.2185   3
 -13 -15   0 5.82774 6.18873   3
  13 -15   0 4.26073 5.61776   1
   0 -16   0 4.43721 1.72812   1
   0  16   0 3.93674 1.49663   5
   0  16   0 6.84491 1.81681   3
  -1 -16   0 -1.2166  1.6834   1
   1 -16   0 -1.5710  1.3957   1
   1 -16   0 -0.3819  1.3268   5
  -1  16   0 -2.6552  1.8965   3
   1  16   0 0.72793 1.72353   3
  -1  16   0 -1.5215  1.5092   3
   1  16   0 -1.7725  1.2254   1
   2 -16   0 183.814  17.357   1
  -2 -16   0 198.991  17.666   1
   2 -16   0 188.073  17.480   1
  -2  16   0 199.271  17.844   3
  -2  16   0 185.495  17.721   3
   2  16   0 185.005  17.944   3
   2  16   0 190.527  17.396   1
  -3 -16   0 153.565  13.990   1
   3 -16   0 134.137  13.531   1
  -3  16   0 127.614  13.733   3
   3  16   0 146.255  14.177   3
  -3  16   0 135.068  13.637   3
   3  16   0 167.018  13.497   1
   4 -16   0 81.3219  8.9383   1
  -4 -16   0 93.2082  9.7727   1
  -4  16   0 87.0771  8.8061   3
   4  16   0 101.244   8.961   1
   4  16   0 68.5365  9.5134   3
  -4  16   0 84.7374  9.0474   3
  -5 -16   0 1.80361 3.51469   1
  -5 -16   0 7.17877 4.04884   3
   5 -16   0 6.41312 2.91703   1
   5  16   0 2.22670 2.38892   1
   5  16   0 4.53937 3.29770   3
  -5  16   0 6.98049 2.71048   3
  -5  16   0 4.29526 2.29791   3
  -6 -16   0 2.88312 3.89609   3
   6 -16   0 3.57225 2.74591   1
  -6 -16   0 4.43355 4.61994   6
   6 -16   0 5.73094 3.19235   2
   6  16   0 2.69358 2.52322   1
  -6  16   0 2.49240 2.54314   3
  -6  16   0 5.44379 2.36704   3
   6  16   0 3.47110 3.48278   3
  -7 -16   0 80.2530  9.7118   3
   7 -16   0 88.2010  8.7801   1
   7 -16   0 79.6601  9.0428   2
  -7 -16   0 86.9976 10.4327   6
  -7  16   0 74.3297  8.4207   3
  -7  16   0 74.3842  8.1445   3
   7  16   0 68.3711  9.1440   3
   7  16   0 77.9644  8.6683   1
   7  16   0 73.7924  8.3891   2
   7  16   0 73.9760 10.3160   6
   8 -16   0 6.42644 3.77188   2
  -8 -16   0 5.99836 4.68409   3
  -8 -16   0 9.52243 5.45300   6
   8 -16   0 11.0114  3.6890   1
  -8  16   0 3.29237 2.67794   3
  -8  16   0 4.31160 3.20007   3
   8  16   0 5.76030 4.39749   3
   8  16   0 9.59372 3.70037   1
   8  16   0 12.0343  3.4764   2
  -9 -16   0 21.6034  6.3293   3
   9 -16   0 25.3437  5.2132   1
   9 -16   0 27.6752  5.2782   2
   9  16   0 16.7656  4.4134   2
   9  16   0 20.5487  6.0713   3
  -9  16   0 23.7136  4.4108   3
   9  16   0 20.4591  5.0624   1
  -9  16   0 23.3949  4.0329   3
 -10 -16   0 -3.6923  4.8941   3
  10 -16   0 4.00983 4.16820   1
  10  16   0 -0.8906  4.1349   1
 -10  16   0 3.85000 2.90725   3
 -11 -16   0 30.6270  7.9758   3
  11 -16   0 42.4859  7.3346   1
 -11  16   0 49.9603  5.8753   3
 -12 -16   0 26.9315  6.8278   3
  12 -16   0 10.7219  5.4019   1
 -13 -16   0 5.92859 6.13934   3
  13 -16   0 -0.2786  5.3088   1
   0 -17   0 1.28270 1.62874   1
   0  17   0 1.06629 1.38695   5
  -1 -17   0 2.91116 1.91554   1
   1 -17   0 -0.7645  1.4786   5
   1 -17   0 1.84915 1.67169   1
  -1  17   0 2.40067 2.26423   3
  -1  17   0 -1.6628  1.6355   3
   1  17   0 -0.3398  1.3383   1
   1  17   0 4.31899 1.98170   3
   2 -17   0 14.5063  2.3886   1
  -2 -17   0 14.6442  2.9987   1
   2 -17   0 8.31982 2.55236   1
  -2  17   0 14.2242  3.0298   3
  -2  17   0 18.2324  2.6137   3
   2  17   0 14.6035  2.9274   3
   2  17   0 17.4449  2.5030   1
   3 -17   0 352.820  30.271   1
  -3 -17   0 306.306  30.457   1
   3  17   0 332.946  31.050   3
  -3  17   0 346.095  30.775   3
   3  17   0 326.763  30.106   1
  -3  17   0 328.186  30.669   3
  -4 -17   0 54.2318  7.1170   1
   4 -17   0 49.7317  6.5316   1
  -4  17   0 60.7224  6.4588   3
  -4  17   0 55.2174  6.5956   3
   4  17   0 55.2480  6.3973   1
   4  17   0 57.0387  6.8973   3
   5 -17   0 54.9055  6.2667   1
  -5 -17   0 63.7520  7.3242   1
  -5 -17   0 36.7209  6.8145   3
   5  17   0 40.9903  6.2847   3
  -5  17   0 51.9480  5.8118   3
  -5  17   0 51.2132  6.0212   3
   5  17   0 49.6824  6.0136   1
  -6 -17   0 24.0560  5.2891   3
   6 -17   0 26.5787  4.5158   2
  -6 -17   0 33.8652  5.9882   6
   6 -17   0 29.6872  4.2747   1
   6  17   0 27.7351  4.2471   1
  -6  17   0 20.1026  3.4603   3
  -6  17   0 20.7547  3.7077   3
   6  17   0 23.4520  4.6115   3
  -7 -17   0 3.10211 4.15697   3
  -7 -17   0 10.1456  5.2603   6
   7 -17   0 -1.6754  2.7903   1
   7 -17   0 7.43989 3.41514   2
   7  17   0 0.91357 2.87361   1
  -7  17   0 7.71560 2.47249   3
  -7  17   0 4.17229 2.81085   3
   7  17   0 7.13958 3.83029   3
   8 -17   0 46.1827  6.0178   1
  -8 -17   0 40.5317  6.8887   3
   8 -17   0 31.3771  5.6635   2
  -8  17   0 29.0782  4.9386   3
   8  17   0 42.8001  5.8180   1
  -8  17   0 32.8358  4.6927   3
   8  17   0 35.2887  6.3448   3
   9 -17   0 13.2231  4.3696   1
   9 -17   0 16.6494  4.7522   2
  -9 -17   0 14.7035  5.6678   3
   9  17   0 13.4809  4.4681   1
  -9  17   0 18.3820  3.9839   3
  -9  17   0 10.7452  3.3921   3
   9  17   0 9.97889 5.34919   3
 -10 -17   0 11.6588  5.8121   3
  10 -17   0 20.5715  5.0151   1
 -10  17   0 8.72413 3.16973   3
 -11 -17   0 15.0347  6.3630   3
  11 -17   0 11.4809  4.8954   1
 -11  17   0 6.53077 3.05720   3
 -12 -17   0 16.7007  6.5902   3
  12 -17   0 28.7054  6.6266   1
 -13 -17   0 -6.9124  5.9231   3
  13 -17   0 1.03896 5.20649   1
   0 -18   0 -0.9788  1.6982   1
   0  18   0 0.98526 1.82075   3
   0  18   0 2.37676 1.59455   5
   1 -18   0 34.9334  4.2553   1
  -1 -18   0 35.8943  4.3883   1
   1 -18   0 31.1456  3.8987   5
   1  18   0 34.7012  4.3084   3
  -1  18   0 33.7977  4.1573   3
   1  18   0 36.1372  4.0291   1
  -1  18   0 32.2458  4.4797   3
   2 -18   0 1.92555 1.73678   1
   2 -18   0 4.27194 2.28061   1
  -2 -18   0 0.22472 2.41182   1
   2  18   0 1.53629 1.86936   1
  -2  18   0 0.70948 2.79868   3
  -2  18   0 -0.8455  2.1276   3
   2  18   0 3.48827 2.67040   3
  -3 -18   0 111.218  10.374   1
   3 -18   0 78.4183  9.8040   1
  -3  18   0 92.7686 10.0656   3
  -3  18   0 122.314   9.951   3
   3  18   0 94.9273  9.7373   1
   3  18   0 87.9416 10.5051   3
   4 -18   0 3.82240 2.83391   1
  -4 -18   0 -1.5542  3.2035   1
   4  18   0 0.79257 2.22173   1
  -4  18   0 1.84262 2.88074   3
  -4  18   0 4.29697 2.39130   3
   4  18   0 -2.7061  3.1446   3
  -5 -18   0 87.2950  9.5039   1
   5 -18   0 92.2610  8.5767   1
  -5  18   0 78.0016  8.3614   3
   5  18   0 71.7663  9.0823   3
  -5  18   0 72.1014  8.2089   3
   5  18   0 84.0204  8.4832   1
  -6 -18   0 14.6651  5.2788   6
   6 -18   0 17.0160  3.6433   1
  -6 -18   0 19.7361  5.0262   1
   6 -18   0 19.9809  4.0114   2
  -6 -18   0 17.8394  4.8990   3
   6  18   0 13.3843  4.1469   3
  -6  18   0 20.1616  3.3750   3
   6  18   0 18.4382  3.6449   1
  -6  18   0 16.8963  3.0402   3
  -7 -18   0 2.19200 4.87854   6
   7 -18   0 4.21359 3.38729   2
   7 -18   0 -0.3049  2.8967   1
  -7 -18   0 -5.1629  3.8643   3
   7  18   0 -1.3978  2.6633   1
  -7  18   0 2.99459 2.34205   3
  -7  18   0 1.34860 2.70995   3
   7  18   0 -6.5817  3.4262   3
  -8 -18   0 210.479  18.990   3
   8 -18   0 185.754  17.527   1
   8 -18   0 154.698  17.562   2
   8  18   0 166.636  18.178   3
  -8  18   0 178.123  17.312   3
   8  18   0 189.071  17.636   1
  -8  18   0 177.601  17.106   3
   9 -18   0 5.30417 3.95882   1
  -9 -18   0 9.06039 5.28207   3
   9 -18   0 3.66904 4.30812   2
  -9  18   0 3.78925 2.78700   3
  -9  18   0 1.78703 3.45061   3
   9  18   0 6.83097 5.13214   3
   9  18   0 10.4155  4.2882   1
 -10 -18   0 59.4999  9.4503   3
  10 -18   0 58.4528  8.0625   1
 -10  18   0 53.3380  6.5545   3
 -11 -18   0 6.93999 6.06708   3
  11 -18   0 5.10666 4.74984   1
 -12 -18   0 11.2804  6.3622   3
  12 -18   0 10.9797  5.6528   1
 -13 -18   0 -5.0818  6.0777   3
  13 -18   0 3.81050 5.57181   1
   0 -19   0 2.13792 2.04137   1
   0  19   0 2.15207 2.15557   3
   0  19   0 0.38194 1.70625   5
   1 -19   0 0.21261 1.88803   5
  -1 -19   0 0.34157 2.32893   1
   1 -19   0 0.68387 2.09424   1
  -1  19   0 4.41756 2.24504   3
  -1  19   0 0.53058 2.75869   3
   1  19   0 1.79068 1.74813   1
   1  19   0 2.01484 2.29485   3
   2 -19   0 2.80712 1.99655   1
  -2 -19   0 1.46825 2.83150   1
   2 -19   0 3.80754 2.43709   1
   2 -19   0 1.49516 2.38581   5
  -2  19   0 1.28494 2.28484   3
   2  19   0 4.04815 2.04894   1
   2  19   0 0.27927 2.82771   3
  -2  19   0 -4.2691  2.8874   3
  -3 -19   0 41.8501  5.9474   1
   3 -19   0 44.8623  5.4707   1
  -3  19   0 46.3061  5.5450   3
   3  19   0 40.9003  5.6874   3
  -3  19   0 45.7253  5.5743   3
   3  19   0 39.6045  5.1940   1
  -4 -19   0 72.7234  9.1517   1
   4 -19   0 73.8067  8.4950   1
  -4  19   0 82.4403  8.4547   3
   4  19   0 74.4212  8.2705   1
   4  19   0 83.8080  9.3879   3
  -4  19   0 96.9703  8.7584   3
  -5 -19   0 305.876  27.750   1
   5 -19   0 326.401  27.223   1
   5  19   0 274.989  26.990   1
  -5  19   0 284.593  27.376   3
   5  19   0 291.590  27.916   3
  -5  19   0 294.857  27.359   3
  -6 -19   0 2.44864 3.89524   1
   6 -19   0 1.25604 2.50987   1
  -6 -19   0 1.10749 4.85665   6
   6 -19   0 1.67126 2.97271   2
  -6 -19   0 6.52557 4.06502   3
  -6  19   0 2.84560 2.13775   3
  -6  19   0 0.21166 2.43609   3
   6  19   0 -2.0062  2.3154   1
   6  19   0 1.86441 3.48238   3
   7 -19   0 -1.8313  3.3385   2
  -7 -19   0 -5.2622  3.6862   3
   7 -19   0 1.94861 2.92404   1
  -7  19   0 -0.9766  2.6214   3
   7  19   0 3.64493 2.95691   1
   7  19   0 -5.8001  3.7264   3
  -7  19   0 -0.0540  2.2024   3
  -8 -19   0 -0.2633  4.6312   3
   8 -19   0 2.27403 3.73504   2
   8 -19   0 5.42828 3.57156   1
   8  19   0 2.67865 4.44776   3
  -8  19   0 2.52429 3.08865   3
   8  19   0 1.54088 3.50815   1
  -8  19   0 6.38050 2.64645   3
   9 -19   0 28.7294  5.2270   1
  -9 -19   0 23.7157  6.2414   3
   9 -19   0 16.2348  4.9963   2
  -9  19   0 17.4386  3.5237   3
   9  19   0 31.0705  6.3360   3
   9  19   0 14.5455  4.7956   1
  10 -19   0 1.60846 4.14005   1
 -10 -19   0 9.15858 5.65008   3
 -10  19   0 1.94763 2.69472   3
 -11 -19   0 13.0608  6.3994   3
  11 -19   0 16.1982  5.1504   1
 -12 -19   0 27.8632  7.1717   3
  12 -19   0 4.34548 5.37045   1
 -13 -19   0 2.08637 6.48318   3
  13 -19   0 10.8364  6.0070   1
   0 -20   0 2.58632 2.32228   1
   0  20   0 2.28583 2.40463   3
   0  20   0 1.62499 1.99164   5
   1 -20   0 2.90754 2.23427   5
   1 -20   0 3.43792 2.41341   1
  -1 -20   0 -2.2705  2.4311   1
   1  20   0 7.75558 2.67890   3
   1  20   0 0.90051 1.80581   1
  -1  20   0 3.32210 2.49004   3
  -1  20   0 0.72253 3.03672   3
   2 -20   0 12.5729  2.8888   5
  -2 -20   0 15.8908  3.3798   1
   2 -20   0 12.2985  3.0004   1
   2  20   0 5.80186 2.40768   1
   2  20   0 7.45645 3.31291   3
  -2  20   0 10.1147  3.4215   3
  -2  20   0 9.02952 2.77187   3
  -3 -20   0 64.3151  7.2040   1
   3 -20   0 53.0066  6.9380   1
  -3  20   0 57.0556  7.1571   3
   3  20   0 60.9567  7.6601   3
  -3  20   0 54.9805  6.8126   3
   3  20   0 72.0291  6.7890   1
  -4 -20   0 146.503  13.124   1
   4 -20   0 142.432  12.730   1
   4  20   0 133.571  12.499   1
  -4  20   0 119.928  12.644   3
  -4  20   0 123.516  12.473   3
   4  20   0 111.856  13.095   3
  -5 -20   0 157.555  15.507   1
   5 -20   0 145.436  14.856   1
  -5  20   0 150.734  14.789   3
   5  20   0 161.549  14.905   1
   5  20   0 156.557  15.495   3
  -5  20   0 159.671  14.909   3
  -6 -20   0 0.79447 3.78872   1
  -6 -20   0 1.57942 3.61292   3
  -6 -20   0 5.75279 5.33614   6
   6 -20   0 -0.0139  2.6613   1
   6  20   0 2.34284 2.58769   1
  -6  20   0 0.19328 2.21556   3
   6  20   0 3.74674 3.51155   3
  -6  20   0 1.48475 2.52032   3
   7 -20   0 31.7477  4.8043   1
   7 -20   0 18.8118  4.5916   2
  -7 -20   0 22.2115  5.6307   3
  -7  20   0 19.7948  3.7569   3
   7  20   0 21.1359  4.4204   1
  -7  20   0 22.1201  3.5031   3
   7  20   0 22.2464  5.0216   3
  -8 -20   0 5.73424 4.88135   3
   8 -20   0 -4.7128  3.5973   2
   8 -20   0 -2.9041  3.3904   1
  -8  20   0 4.02401 3.12879   3
   8  20   0 -0.6441  3.4280   1
   8  20   0 -3.8178  4.4864   3
  -8  20   0 2.73499 2.53001   3
  -9 -20   0 317.180  30.333   3
   9 -20   0 291.648  28.931   2
   9 -20   0 333.747  29.044   1
  -9  20   0 311.695  28.529   3
   9  20   0 277.530  29.737   3
  10 -20   0 -4.4592  3.7745   1
 -10 -20   0 5.14866 5.59189   3
 -10  20   0 -4.5179  2.3925   3
 -11 -20   0 17.3525  6.5608   3
  11 -20   0 3.68464 4.70882   1
  12 -20   0 3.06187 5.01388   1
 -12 -20   0 3.19294 5.84013   3
 -13 -20   0 -8.2055  6.0490   3
  13 -20   0 11.7738  6.0186   1
   0 -21   0 -3.8862  2.3965   1
   0  21   0 1.23866 2.15348   5
   0  21   0 3.66855 2.68052   3
   1 -21   0 17.2834  3.3505   1
  -1 -21   0 21.0887  3.7841   1
   1 -21   0 13.5302  3.0207   5
   1  21   0 19.6066  2.9842   1
  -1  21   0 13.5834  3.8661   3
   1  21   0 15.0168  3.1863   5
   1  21   0 14.5324  3.4498   3
  -1  21   0 19.0818  3.4474   3
   2 -21   0 30.9377  4.1327   1
   2 -21   0 21.3272  3.8190   5
  -2 -21   0 22.9411  4.2968   1
  -2  21   0 22.2039  4.2919   3
   2  21   0 24.8081  3.6468   1
   2  21   0 29.4937  4.5253   3
  -2  21   0 25.7654  3.8683   3
  -3 -21   0 186.352  20.345   1
   3 -21   0 213.966  20.291   1
  -3  21   0 211.553  20.440   3
  -3  21   0 249.633  20.640   3
   3  21   0 215.155  20.906   3
   3  21   0 225.589  20.166   1
  -4 -21   0 230.376  21.981   1
   4 -21   0 225.227  21.519   1
   4  21   0 222.435  21.431   1
  -4  21   0 212.092  21.640   3
   4  21   0 253.186  22.348   3
  -4  21   0 253.244  21.816   3
  -5 -21   0 105.480  10.846   1
   5 -21   0 81.4191  9.9213   1
   5  21   0 92.1079 10.6255   3
  -5  21   0 105.367   9.904   3
   5  21   0 93.9713  9.9551   1
  -5  21   0 103.550   9.784   3
  -6 -21   0 48.7382  6.7431   1
   6 -21   0 41.4242  5.1726   1
  -6 -21   0 34.6615  5.7576   3
  -6  21   0 24.9441  4.2134   3
   6  21   0 36.6906  5.5355   3
  -6  21   0 29.5928  4.1464   3
   6  21   0 29.6652  4.6133   1
   7 -21   0 9.67755 3.53015   1
   7 -21   0 8.72616 3.93053   2
  -7 -21   0 3.04073 4.53069   3
   7  21   0 7.50299 3.37481   1
  -7  21   0 5.53510 2.94733   3
  -7  21   0 12.6312  2.8126   3
   7  21   0 2.57900 4.22084   3
  -8 -21   0 7.32119 5.11613   3
   8 -21   0 5.98547 4.13765   2
   8 -21   0 12.8593  3.9865   1
   8  21   0 -1.1424  4.6400   3
   8  21   0 12.5961  3.9881   1
  -8  21   0 2.04344 3.13372   3
  -8  21   0 7.81139 2.74232   3
   9 -21   0 12.6277  4.8739   2
   9 -21   0 16.2339  4.7001   1
  -9 -21   0 10.9398  5.7390   3
  -9  21   0 16.5255  3.3038   3
   9  21   0 10.9067  5.8719   3
 -10 -21   0 -7.5628  4.7834   3
  10 -21   0 5.07266 4.09869   1
 -11 -21   0 -1.9756  5.4300   3
  11 -21   0 6.35422 4.75353   1
  12 -21   0 -0.7905  4.9932   1
 -12 -21   0 1.97819 6.02466   3
 -13 -21   0 9.14981 6.34709   3
  13 -21   0 6.68889 5.78610   1
   0 -22   0 -0.6976  2.6199   1
   0  22   0 -0.4855  2.7869   3
   0  22   0 -1.3397  2.1447   5
   1 -22   0 25.6621  4.0381   1
  -1 -22   0 35.2462  4.4613   1
   1 -22   0 30.0689  3.8820   5
  -1  22   0 25.2333  4.5724   3
   1  22   0 12.5896  3.2372   1
   1  22   0 26.8976  4.2027   3
   1  22   0 30.0098  3.9400   5
  -1  22   0 28.3525  4.1060   3
  -2 -22   0 1.63354 3.13246   1
   2 -22   0 0.11660 2.46653   5
   2 -22   0 2.42781 2.90149   1
   2  22   0 4.17539 3.23291   3
  -2  22   0 4.22985 3.28867   3
   2  22   0 4.24438 2.32193   1
  -2  22   0 1.42757 2.69981   3
   3 -22   0 91.6270  9.6150   1
  -3 -22   0 111.404  10.072   1
   3  22   0 85.0391 10.1771   3
  -3  22   0 107.943   9.624   3
   3  22   0 86.4472  9.3202   1
  -3  22   0 81.8724  9.7340   3
  -4 -22   0 104.160   9.851   1
   4 -22   0 85.5808  9.0549   1
   4  22   0 92.8883  9.0695   1
   4  22   0 83.2033  9.7756   3
  -4  22   0 81.5149  9.0934   3
  -4  22   0 83.2050  8.9092   3
  -5 -22   0 31.7068  5.4280   1
   5 -22   0 23.8285  4.1696   1
   5  22   0 31.9120  4.3197   1
  -5  22   0 25.8598  3.6287   3
   5  22   0 19.8594  4.6268   3
  -5  22   0 21.4574  3.8427   3
  -6 -22   0 59.3701  8.9629   1
   6 -22   0 67.7647  7.8399   1
  -6 -22   0 69.2215  8.7556   3
   6  22   0 81.4281  7.9290   1
  -6  22   0 63.7734  7.3978   3
  -6  22   0 69.9790  7.5956   3
   6  22   0 76.8206  8.7470   3
   7 -22   0 2.25899 3.57015   2
   7 -22   0 3.37710 3.30484   1
  -7 -22   0 4.60289 4.51516   3
   7  22   0 3.63344 4.20473   3
   7  22   0 1.02720 3.15337   1
  -7  22   0 1.93952 2.79097   3
  -7  22   0 1.33019 2.37133   3
  -8 -22   0 124.948  14.017   3
   8 -22   0 125.686  13.173   2
   8 -22   0 122.633  12.747   1
   8  22   0 120.990  13.636   3
  -8  22   0 118.212  11.985   3
   8  22   0 122.345  12.985   1
   9 -22   0 -0.3593  3.7372   1
   9 -22   0 6.88601 4.37865   2
  -9 -22   0 1.36003 5.14674   3
  -9  22   0 1.87115 2.76268   3
   9  22   0 -5.0202  4.9722   3
  10 -22   0 7.17976 4.51354   1
 -10 -22   0 5.96227 5.61937   3
  11 -22   0 -1.1176  4.2883   1
 -11 -22   0 0.86178 5.89742   3
  12 -22   0 9.44258 5.45747   1
 -12 -22   0 9.88793 6.62879   3
 -13 -22   0 7.17994 6.51574   3
   0 -23   0 -3.2181  2.5576   1
   0  23   0 2.52831 2.84312   3
   0  23   0 0.21714 2.32009   5
   1 -23   0 0.06928 2.64277   1
  -1 -23   0 -1.7557  2.7638   1
   1 -23   0 2.48473 2.56446   5
  -1  23   0 -0.2950  3.4127   3
   1  23   0 -0.8989  1.7101   1
   1  23   0 -0.3095  2.4817   5
   1  23   0 2.59256 2.98898   3
  -1  23   0 5.23259 2.75754   3
  -2 -23   0 6.68751 3.15977   1
   2 -23   0 3.48048 2.73244   1
   2 -23   0 -1.9932  2.4467   5
  -2  23   0 -2.7645  3.1704   3
   2  23   0 -0.1003  2.1403   1
   2  23   0 1.73592 3.10744   3
  -2  23   0 5.79023 2.80681   3
   3 -23   0 -4.5343  2.4338   1
  -3 -23   0 0.74420 2.91275   1
   3 -23   0 -0.2257  2.2070   1
   3  23   0 4.98454 2.48926   1
   3  23   0 2.00023 3.16646   3
  -3  23   0 0.95130 3.01641   3
  -3  23   0 6.06107 2.51135   3
  -4 -23   0 102.694  10.698   1
   4 -23   0 99.5957 10.1347   1
  -4  23   0 93.8934  9.9519   3
   4  23   0 99.8400 10.8158   3
   4  23   0 101.326  10.076   1
  -4  23   0 101.757  10.155   3
   5 -23   0 56.1282  5.6886   1
  -5 -23   0 46.9006  6.4686   1
  -5  23   0 26.5925  4.4002   3
  -5  23   0 40.9059  5.0797   3
   5  23   0 31.4253  5.4718   3
   5  23   0 36.3232  5.0123   1
   6 -23   0 9.34726 3.21392   1
  -6 -23   0 8.47171 4.43279   3
  -6 -23   0 6.85586 4.44539   1
  -6  23   0 5.41762 2.76299   3
   6  23   0 7.15790 3.06393   1
  -6  23   0 7.60370 2.58729   3
   6  23   0 6.04044 3.87906   3
  -7 -23   0 1.24448 4.29729   3
   7 -23   0 -2.9688  3.4294   2
   7 -23   0 -0.4135  3.1850   1
  -7  23   0 2.34775 2.43017   3
   7  23   0 0.61060 4.18203   3
   7  23   0 0.04541 3.15049   1
   8 -23   0 1.74621 4.12628   2
   8 -23   0 14.8602  4.2426   1
  -8 -23   0 8.49415 5.30435   3
  -8  23   0 5.39624 2.75894   3
   8  23   0 4.67891 5.05949   3
  -9 -23   0 0.80186 5.33262   3
   9 -23   0 4.95926 4.56743   2
   9 -23   0 16.0317  4.6643   1
   9  23   0 -1.1814  5.4559   3
  10 -23   0 -10.208   3.493   1
 -10 -23   0 7.01687 5.51311   3
 -11 -23   0 0.05895 5.84535   3
  11 -23   0 1.21987 4.26865   1
  12 -23   0 18.1838  6.2068   1
 -12 -23   0 33.9584  7.8534   3
   0 -24   0 217.892  20.312   1
   0  24   0 206.432  20.077   5
   0  24   0 232.070  20.742   3
   1 -24   0 3.02585 2.54280   5
   1 -24   0 3.33167 2.71882   1
  -1 -24   0 -4.4452  2.6641   1
  -1  24   0 3.47023 2.67056   3
  -1  24   0 3.74827 3.44565   3
   1  24   0 0.35693 2.44074   5
   1  24   0 0.35951 1.65913   1
   1  24   0 -3.5179  2.8645   3
   2 -24   0 29.7646  4.2435   5
  -2 -24   0 33.8250  4.9609   1
   2 -24   0 27.4803  4.4937   1
   2  24   0 32.5269  4.8198   3
   2  24   0 32.9104  4.3051   1
  -2  24   0 31.3218  4.3475   3
  -2  24   0 24.0328  4.6302   3
   3 -24   0 5.12501 2.75055   1
  -3 -24   0 -3.4708  2.8897   1
   3 -24   0 1.52597 2.34929   1
  -3  24   0 -1.6495  2.8865   3
   3  24   0 -0.6310  3.1382   3
  -3  24   0 5.79451 2.44400   3
   3  24   0 3.23268 2.47336   1
  -4 -24   0 12.1645  3.6834   1
   4 -24   0 5.59828 2.99017   1
  -4  24   0 8.52467 3.06124   3
   4  24   0 12.4870  3.6369   3
   4  24   0 9.72072 2.90660   1
  -4  24   0 10.6597  2.6722   3
   5 -24   0 15.4186  3.8332   1
  -5 -24   0 21.3035  4.9121   1
   5  24   0 22.0000  3.9254   1
  -5  24   0 24.7069  3.4058   3
  -5  24   0 20.2502  3.5716   3
   5  24   0 17.7384  4.3776   3
  -6 -24   0 0.95647 4.07536   1
   6 -24   0 3.18451 2.96248   1
   6  24   0 -2.9495  2.6936   1
  -6  24   0 0.60621 2.66515   3
   6  24   0 -0.3854  3.6659   3
  -6  24   0 0.60391 2.26323   3
   7 -24   0 0.21606 3.73853   2
   7 -24   0 5.90774 3.47451   1
  -7 -24   0 7.43067 4.89077   3
   7  24   0 5.48653 4.44517   3
  -7  24   0 2.40957 2.45057   3
   7  24   0 -1.5700  3.2199   1
  -8 -24   0 5.77373 5.24446   3
   8 -24   0 -6.3747  3.3618   1
   8 -24   0 -0.7028  4.0294   2
  -8  24   0 -0.8882  2.5640   3
   8  24   0 13.0936  5.3480   3
   9 -24   0 21.2949  5.2761   1
  -9 -24   0 32.0515  7.2464   3
   9  24   0 22.2205  6.5890   3
  10 -24   0 6.45161 4.34107   1
 -10 -24   0 -1.8774  5.2065   3
 -11 -24   0 7.72507 6.40779   3
  11 -24   0 15.6011  5.2898   1
 -12 -24   0 18.3748  7.2320   3
  12 -24   0 21.1586  6.1650   1
   0 -25   0 4.31971 2.78780   1
   0  25   0 -0.1952  2.3170   5
   0  25   0 2.60306 2.95675   3
   0  25   0 1.83284 3.53610   3
   1 -25   0 7.62291 2.84777   1
  -1 -25   0 5.65953 3.08065   1
   1  25   0 7.09902 2.59744   5
  -1  25   0 9.64946 3.65035   3
   1  25   0 0.29088 1.67301   1
  -1  25   0 4.25316 2.76412   3
   1  25   0 5.48666 3.10687   3
  -2 -25   0 0.52413 2.91011   1
   2 -25   0 3.43263 2.63904   1
   2 -25   0 0.32482 2.41680   5
  -2  25   0 1.29094 3.10166   3
   2  25   0 4.75684 2.39457   1
  -2  25   0 -0.4189  2.4955   3
   2  25   0 2.80601 3.13822   3
  -3 -25   0 15.4977  3.7080   1
   3 -25   0 14.2605  3.2934   1
   3 -25   0 15.5574  3.2293   5
   3  25   0 12.3739  3.0356   1
   3  25   0 4.62868 3.46784   3
  -3  25   0 15.2911  3.4048   3
  -3  25   0 11.2360  2.8647   3
   4 -25   0 10.9008  3.2212   1
  -4 -25   0 6.17260 3.53945   1
   4  25   0 6.40566 2.66906   1
   4  25   0 7.91029 3.39754   3
  -4  25   0 9.57393 3.00311   3
  -4  25   0 6.14661 2.44197   3
  -5 -25   0 19.0197  4.8112   1
   5 -25   0 18.6824  3.8398   1
  -5  25   0 18.8702  3.4910   3
   5  25   0 22.9034  3.9162   1
   5  25   0 15.7363  4.3448   3
  -5  25   0 16.7895  3.1846   3
   6 -25   0 3.84141 3.21088   1
  -6 -25   0 2.77472 4.27575   1
  -6  25   0 3.24531 2.70872   3
  -6  25   0 2.67154 2.48230   3
   6  25   0 5.44424 4.03774   3
   6  25   0 6.09927 3.15737   1
   7 -25   0 8.58168 4.18639   2
  -7 -25   0 13.2882  5.2679   3
   7 -25   0 9.46043 3.72974   1
  -7  25   0 6.70078 2.70110   3
   7  25   0 13.1766  4.9172   3
  -8 -25   0 7.78582 5.47912   3
   8 -25   0 3.38403 4.29236   2
   8  25   0 3.10298 5.18429   3
  -9 -25   0 6.44274 5.60240   3
   9 -25   0 5.33361 4.12306   1
   9  25   0 6.24817 5.60686   3
  10 -25   0 2.18317 4.13512   1
 -10 -25   0 2.00549 5.35176   3
 -11 -25   0 3.09795 6.20246   3
  11 -25   0 9.63873 4.90987   1
 -12 -25   0 14.6020  7.1357   3
  12 -25   0 28.1556  6.6740   1
   0 -26   0 0.33335 2.55927   1
   0  26   0 3.06880 2.81218   3
   0  26   0 0.07081 3.40863   3
   0  26   0 2.35575 2.38165   5
  -1 -26   0 137.243  13.845   1
   1 -26   0 147.339  13.762   1
  -1  26   0 150.102  13.960   3
   1  26   0 133.924  13.541   5
   1  26   0 136.095  14.076   3
  -1  26   0 149.243  14.231   3
   2 -26   0 -3.0687  2.3073   5
   2 -26   0 0.51015 2.64649   1
  -2 -26   0 -0.2785  2.8538   1
  -2  26   0 -2.4792  3.0464   3
   2  26   0 1.69891 2.32461   1
  -2  26   0 1.02014 2.51777   3
   2  26   0 0.80827 2.90666   3
   3 -26   0 93.8153  9.4713   1
   3 -26   0 104.604   9.430   5
  -3 -26   0 89.1484  9.6893   1
   3  26   0 82.4670  9.9069   3
   3  26   0 96.3101  9.4234   1
  -3  26   0 88.9561  9.5766   3
  -3  26   0 84.3787  9.3094   3
   4 -26   0 13.2212  3.3569   1
  -4 -26   0 13.9107  4.0672   1
   4  26   0 6.14761 3.57279   3
  -4  26   0 8.58878 2.66782   3
  -4  26   0 11.0817  3.1575   3
   4  26   0 14.9114  3.2639   1
  -5 -26   0 5.69840 3.92935   1
   5 -26   0 4.02536 3.05805   1
   5  26   0 6.71822 3.69043   3
   5  26   0 9.85317 3.19971   1
  -5  26   0 8.22600 2.95621   3
  -5  26   0 4.95692 2.52356   3
  -6 -26   0 5.39795 4.58461   1
   6 -26   0 -0.3789  3.2032   1
  -6  26   0 7.01549 2.61826   3
  -6  26   0 2.84729 2.68332   3
   6  26   0 1.63351 3.04295   1
   6  26   0 1.26622 4.14597   3
   7 -26   0 6.48190 3.71119   1
  -7 -26   0 9.58522 5.22546   3
   7  26   0 0.93021 4.52018   3
   8 -26   0 405.608  37.071   1
  -8 -26   0 384.484  38.634   3
   8 -26   0 382.214  37.083   2
   8  26   0 426.650  38.179   3
  -9 -26   0 2.77751 5.33694   3
   9 -26   0 1.63136 4.07234   1
   9  26   0 0.60064 5.30601   3
  10 -26   0 -4.7680  3.9714   1
 -10 -26   0 1.86116 5.64152   3
  11 -26   0 4.53754 4.61537   1
 -11 -26   0 -6.3644  5.5552   3
  12 -26   0 2.72531 5.43834   1
 -12 -26   0 15.9300  7.1627   3
   0 -27   0 -0.1774  2.6235   1
   0  27   0 -0.0944  2.7405   3
   0  27   0 3.04434 2.35641   5
   0  27   0 1.36722 3.46290   3
   1 -27   0 -2.0805  2.5087   1
  -1 -27   0 0.60927 2.82943   1
  -1  27   0 6.94128 3.55414   3
   1  27   0 4.49810 2.54288   5
   1  27   0 5.87295 2.94619   3
  -1  27   0 4.13040 2.72421   3
   2 -27   0 9.80824 2.91323   1
   2 -27   0 9.04868 2.71021   5
  -2 -27   0 10.5707  3.4167   1
   2  27   0 7.86426 3.16935   3
  -2  27   0 8.14201 2.74106   3
   2  27   0 2.00650 2.52006   1
  -2  27   0 8.80871 3.30955   3
   3 -27   0 122.421  13.418   1
  -3 -27   0 127.844  13.776   1
   3 -27   0 140.522  13.437   5
  -3  27   0 155.854  13.739   3
   3  27   0 140.413  13.472   1
   3  27   0 134.822  13.999   3
  -3  27   0 146.174  13.525   3
  -4 -27   0 30.5235  5.6384   1
   4 -27   0 34.2601  5.1342   1
  -4  27   0 45.9953  5.2614   3
   4  27   0 33.8456  5.5147   3
  -4  27   0 36.5888  4.6122   3
   4  27   0 30.5713  4.8487   1
  -5 -27   0 20.0070  5.1994   1
   5 -27   0 34.2470  4.7644   1
  -5  27   0 22.3700  3.6373   3
  -5  27   0 22.7295  3.9456   3
   5  27   0 23.1752  4.3431   1
   5  27   0 22.3096  4.8660   3
  -6 -27   0 3.56601 4.54312   1
   6 -27   0 3.17561 3.41894   1
  -6  27   0 3.19552 2.44584   3
   6  27   0 2.76128 4.25029   3
  -7 -27   0 10.6558  5.4952   3
   7 -27   0 44.8867  5.5993   1
   7  27   0 12.2503  5.2614   3
   8 -27   0 11.1672  4.4828   1
   8 -27   0 21.6146  5.1074   2
   8  27   0 9.77206 5.50853   3
  -9 -27   0 3.77007 5.56022   3
   9  27   0 12.3836  5.9289   3
 -10 -27   0 3.89076 5.87848   3
  10 -27   0 3.48084 4.42053   1
  11 -27   0 21.1831  5.8231   1
 -11 -27   0 11.3916  6.7625   3
 -12 -27   0 1.86174 6.47057   3
  12 -27   0 -5.5732  4.8816   1
   0 -28   0 39.5702  5.1986   1
   0  28   0 38.5052  5.5894   3
   0  28   0 31.3626  4.8955   3
   0  28   0 34.9608  4.7018   5
   1 -28   0 1.57308 2.72437   1
  -1 -28   0 -0.2704  2.6758   1
  -1  28   0 -3.2253  3.3132   3
   1  28   0 -1.2241  2.3028   5
   1  28   0 0.87464 2.92012   3
  -1  28   0 0.04401 2.62212   3
  -2 -28   0 94.9121 10.1137   1
   2 -28   0 103.458  10.049   1
   2 -28   0 98.1747  9.7331   5
   2  28   0 100.941  10.061   1
  -2  28   0 96.0986 10.2689   3
  -2  28   0 93.9419  9.9391   3
   2  28   0 96.2995 10.3633   3
   3 -28   0 31.6879  4.7261   1
   3 -28   0 23.8365  4.3448   5
  -3 -28   0 30.4927  5.1732   1
   3  28   0 35.3062  5.0368   3
  -3  28   0 32.8104  4.2803   3
   3  28   0 30.8711  4.4846   1
  -3  28   0 31.2036  4.6958   3
   4 -28   0 9.27025 3.34702   1
  -4 -28   0 3.56111 3.68952   1
   4  28   0 9.98253 3.78765   3
  -4  28   0 10.7537  2.8650   3
   4  28   0 9.94874 3.24142   1
  -4  28   0 12.4200  3.2369   3
   5 -28   0 37.9589  5.1975   1
  -5 -28   0 22.2724  5.5664   1
   5  28   0 25.8721  5.1842   3
   5  28   0 33.8750  4.9244   1
  -5  28   0 26.3643  4.0778   3
  -5  28   0 32.2771  4.4468   3
  -6 -28   0 2.89702 4.63252   1
   6 -28   0 1.03850 3.25470   1
  -6  28   0 6.24583 2.62357   3
   6  28   0 -5.0438  4.0556   3
  -7 -28   0 241.271  26.459   3
   7 -28   0 281.177  25.456   1
   7  28   0 277.712  26.217   3
  -8 -28   0 2.40868 5.43897   3
   8 -28   0 0.35098 4.53792   2
   8 -28   0 3.24856 3.92346   1
   8  28   0 5.42252 5.24026   3
  -9 -28   0 263.156  25.872   3
   9 -28   0 250.820  24.284   1
   9  28   0 243.981  25.142   3
  10 -28   0 1.75283 4.41917   1
 -10 -28   0 -4.3250  5.5114   3
 -11 -28   0 42.7080  9.4863   3
  11 -28   0 69.2081  8.9745   1
 -12 -28   0 2.07441 6.55095   3
  12 -28   0 -1.5512  5.3317   1
   0 -29   0 1.53751 2.58886   1
   0  29   0 -1.2047  2.4789   3
   0  29   0 2.15798 2.37030   5
   0  29   0 -0.5286  3.4334   3
   1 -29   0 -3.1130  2.4340   1
  -1 -29   0 1.91985 2.73693   1
   1  29   0 3.32446 2.49861   5
  -1  29   0 -0.7188  3.3560   3
  -1  29   0 0.34754 2.54413   3
   1  29   0 -0.2298  2.8486   3
   2 -29   0 4.23029 2.81033   1
  -2 -29   0 7.98764 3.21561   1
   2 -29   0 11.7426  2.8959   5
  -2  29   0 7.23046 3.46183   3
  -2  29   0 4.76680 2.59013   3
   2  29   0 4.86413 2.56697   1
   2  29   0 1.94320 3.03798   3
  -3 -29   0 65.1185  8.1131   1
   3 -29   0 68.7094  7.7574   1
   3 -29   0 72.7180  7.6296   5
  -3  29   0 78.4734  7.9755   3
   3  29   0 68.4148  8.2470   3
   3  29   0 66.8113  7.7029   1
  -3  29   0 66.3495  7.5957   3
   4 -29   0 9.70576 3.21407   1
  -4 -29   0 5.73142 3.81187   1
   4 -29   0 -0.2731  2.8716   5
  -4  29   0 5.67361 3.02371   3
  -4  29   0 2.90082 2.57933   3
   4  29   0 2.63939 3.58078   3
   4  29   0 6.39107 3.05995   1
  -5 -29   0 73.9797  8.6198   1
   5 -29   0 57.0310  7.5587   1
   5  29   0 49.9947  7.7801   3
  -5  29   0 68.9485  7.1897   3
  -5  29   0 61.3967  6.9371   3
   6 -29   0 8.15419 3.80786   1
  -6 -29   0 5.54932 4.86798   1
   6  29   0 1.56900 4.39708   3
  -6  29   0 4.51544 2.60467   3
   7 -29   0 71.4224  8.3605   1
  -7 -29   0 46.5569  8.9601   3
   7  29   0 76.4738  9.3683   3
   8 -29   0 0.75313 4.37869   2
  -8 -29   0 4.76460 5.60935   3
   8  29   0 12.1701  5.6063   3
  -9 -29   0 18.3240  6.3316   3
   9 -29   0 5.86771 4.43991   1
   9  29   0 12.0785  5.9996   3
  10 -29   0 -3.0871  4.3105   1
 -10 -29   0 3.77697 6.03698   3
  11 -29   0 21.7275  6.1448   1
 -11 -29   0 31.6727  7.7556   3
  12 -29   0 14.5846  6.0709   1
 -12 -29   0 6.90239 7.01304   3
   0 -30   0 1.47040 2.61549   1
   0  30   0 -1.0267  2.4069   5
   0  30   0 0.39938 2.67482   3
   0  30   0 -1.7562  3.4042   3
   1 -30   0 2.51472 2.81247   1
  -1 -30   0 4.40722 2.86371   1
  -1  30   0 13.4862  3.9603   3
  -1  30   0 9.98709 2.94178   3
   1  30   0 5.52052 2.69884   5
   1  30   0 8.27395 3.23348   3
  -2 -30   0 -1.4743  2.9284   1
   2 -30   0 -0.5288  2.5628   5
   2 -30   0 1.43832 2.72415   1
   2  30   0 3.56009 2.58622   1
  -2  30   0 0.84984 2.35515   3
   2  30   0 0.58984 2.92159   3
  -2  30   0 -0.5081  3.2303   3
   2  30   0 0.56533 2.90003   5
   3 -30   0 72.3174  8.0664   5
   3 -30   0 74.7761  8.2924   1
  -3 -30   0 83.0617  8.6846   1
  -3  30   0 72.1834  8.1070   3
  -3  30   0 80.0782  8.4989   3
   3  30   0 70.1870  8.8454   3
   3  30   0 78.5002  8.3286   1
   4 -30   0 -0.9607  2.9444   5
   4 -30   0 -0.0091  2.8762   1
  -4 -30   0 -0.6909  3.5327   1
  -4  30   0 -0.9327  2.4438   3
   4  30   0 -3.7447  3.4832   3
  -4  30   0 3.17342 3.00673   3
   5 -30   0 23.9243  4.5865   1
  -5 -30   0 27.4488  5.5418   1
   5  30   0 25.8317  5.2295   3
  -5  30   0 12.5198  3.3313   3
  -5  30   0 19.6501  3.7457   3
   6 -30   0 -4.2003  3.3818   1
  -6 -30   0 -1.2008  4.4186   1
   6  30   0 0.25968 4.38725   3
  -6  30   0 2.39576 2.66201   3
   7 -30   0 1.82530 4.02110   1
  -7 -30   0 0.71255 5.08106   3
   7  30   0 2.54814 4.79313   3
   8 -30   0 259.488  24.010   2
   8 -30   0 252.869  23.713   1
  -8 -30   0 232.073  24.989   3
   8  30   0 234.712  24.437   3
  -9 -30   0 1.31818 5.90432   3
   9 -30   0 -0.9237  4.0130   1
   9  30   0 -4.0809  5.3017   3
  10 -30   0 -2.6404  4.2968   1
 -10 -30   0 -6.7248  5.5029   3
  11 -30   0 -1.9711  4.7591   1
 -11 -30   0 6.57726 6.42327   3
 -12 -30   0 -1.0911  6.4856   3
   0 -31   0 1.23066 2.69034   1
   0  31   0 4.82557 2.79066   3
   0  31   0 -0.8177  3.5675   3
   0  31   0 4.23130 2.62314   5
  -1 -31   0 0.35681 2.85247   1
   1 -31   0 -1.6422  2.5396   1
  -1  31   0 -1.8167  2.5325   3
   1  31   0 0.29135 2.91217   3
   1  31   0 5.46578 2.73181   5
  -1  31   0 2.70480 3.59947   3
  -2 -31   0 -1.7324  2.9364   1
   2 -31   0 -2.6547  2.7009   1
   2 -31   0 0.64157 2.71500   5
  -2  31   0 0.60740 2.45779   3
   2  31   0 -0.5625  2.8843   5
  -2  31   0 -1.2562  3.2933   3
   2  31   0 0.43696 3.11464   3
  -3 -31   0 23.5354  4.6029   1
   3 -31   0 21.9643  4.1086   1
   3 -31   0 20.1969  3.8820   5
  -3  31   0 18.4234  4.0936   3
  -3  31   0 21.4433  3.5584   3
   3  31   0 12.7770  4.1635   3
  -4 -31   0 0.12545 3.63118   1
   4 -31   0 2.79291 3.03580   1
   4 -31   0 0.64422 3.32017   5
  -4  31   0 -1.5019  3.0900   3
  -4  31   0 3.79511 2.65899   3
   4  31   0 -0.5304  3.5987   3
  -5 -31   0 20.0745  5.4581   1
   5 -31   0 22.3714  4.6399   1
  -5  31   0 24.4031  3.8030   3
   5  31   0 20.8520  5.0232   3
   6 -31   0 4.76479 3.84936   1
   6  31   0 -10.769   4.047   3
  -7 -31   0 3.40932 5.53964   3
   7 -31   0 3.14649 4.15724   1
   7  31   0 8.90610 4.97600   3
   8 -31   0 6.05473 4.80648   2
   8 -31   0 11.7153  4.5141   1
  -8 -31   0 18.2467  6.2939   3
   8  31   0 16.7675  6.0827   3
   9 -31   0 -0.6073  4.2632   1
  -9 -31   0 2.43541 5.89364   3
   9  31   0 1.95593 5.70166   3
  10 -31   0 0.23231 4.48867   1
 -10 -31   0 -0.7565  5.9383   3
  11 -31   0 -3.5044  4.6516   1
 -11 -31   0 6.80017 6.59276   3
   0 -32   0 90.3828  9.8829   1
   0  32   0 91.9243  9.9266   3
   0  32   0 102.178  10.563   3
   1 -32   0 -3.2827  2.6425   1
  -1 -32   0 0.32305 2.88857   1
  -1  32   0 -1.7335  2.5956   3
   1  32   0 -1.3660  2.9785   3
   1  32   0 -1.1101  2.6543   5
  -1  32   0 -3.5682  3.5340   3
   2 -32   0 -0.1392  2.9676   5
  -2 -32   0 1.14260 3.31340   1
   2 -32   0 10.5611  3.2636   1
  -2  32   0 4.54130 3.59354   3
   2  32   0 5.40950 3.23099   5
   2  32   0 -1.5593  2.9644   3
  -2  32   0 5.96935 2.68327   3
   3 -32   0 6.58791 3.09809   5
  -3 -32   0 0.69637 3.27327   1
   3 -32   0 -1.6682  2.9865   1
  -3  32   0 1.24332 2.53705   3
  -3  32   0 -0.0652  3.2862   3
   3  32   0 -3.1785  3.3463   3
  -4 -32   0 4.64278 3.96444   1
   4 -32   0 3.95676 3.37921   1
   4 -32   0 2.37587 3.40962   5
  -4  32   0 0.55815 3.17359   3
   4  32   0 4.03336 3.84423   3
  -4  32   0 3.48204 2.57381   3
  -5 -32   0 10.4883  4.7493   1
   5 -32   0 7.73039 3.86444   1
  -5  32   0 7.87373 2.93456   3
   5  32   0 12.0636  4.5428   3
   6 -32   0 0.04981 3.85993   1
   6  32   0 -2.6031  4.3819   3
   7 -32   0 5.90454 4.24334   1
   7  32   0 0.53191 4.92958   3
   8 -32   0 7.19269 4.99082   2
   8 -32   0 0.69241 4.18574   1
  -8 -32   0 6.36825 5.86066   3
   8  32   0 -3.5296  5.1460   3
   9 -32   0 5.43945 4.64993   1
  -9 -32   0 2.44025 5.96872   3
   9  32   0 4.69872 5.86030   3
 -10 -32   0 5.37613 6.52123   3
  10 -32   0 8.35363 5.06157   1
  11 -32   0 6.15171 5.34159   1
 -11 -32   0 0.57219 6.57631   3
   0 -33   0 -1.5272  2.6801   1
   0  33   0 5.34326 3.03282   3
   0  33   0 4.31026 3.97445   3
  -1 -33   0 1.52929 3.10510   1
   1 -33   0 3.75763 3.04000   1
   1  33   0 2.48847 2.93981   5
  -1  33   0 -3.5115  2.5084   3
  -1  33   0 2.14610 3.86777   3
   1  33   0 -0.8097  3.0422   3
   2 -33   0 13.1587  3.6409   1
   2 -33   0 10.0164  3.5174   5
  -2 -33   0 9.07985 3.73448   1
   2  33   0 4.36449 3.44181   5
  -2  33   0 3.34343 4.21626   3
  -2  33   0 15.2389  3.2567   3
   2  33   0 13.2624  3.8021   3
   3 -33   0 14.5549  3.8757   5
   3 -33   0 17.5587  4.0719   1
  -3 -33   0 13.1222  4.2696   1
  -3  33   0 19.1319  4.0962   3
   3  33   0 16.5601  4.3177   3
  -3  33   0 13.6914  3.3245   3
   4 -33   0 10.0205  3.7454   1
   4 -33   0 12.6429  3.9262   5
  -4 -33   0 3.71011 4.18823   1
   4  33   0 12.7806  4.3154   3
  -4  33   0 12.4102  3.5900   3
  -4  33   0 8.21310 3.05325   3
   5 -33   0 20.2118  4.4846   1
  -5 -33   0 10.0253  5.0657   1
   5 -33   0 19.4771  4.6760   5
   5  33   0 11.4778  4.8035   3
  -5  33   0 10.1061  3.0764   3
   6 -33   0 12.0711  4.3602   1
   6  33   0 -3.4376  4.6301   3
   7 -33   0 -0.8405  4.0079   1
   7  33   0 0.94262 5.01141   3
   8 -33   0 9.97345 4.50972   1
  -8 -33   0 0.65886 5.49293   3
   8  33   0 -4.5848  5.2457   3
   9 -33   0 -2.9673  4.0498   1
  -9 -33   0 -8.0845  5.8532   3
   9  33   0 -2.0275  5.5985   3
  10 -33   0 1.45383 4.69655   1
 -10 -33   0 -1.7537  6.2994   3
  11 -33   0 2.54150 5.40531   1
 -11 -33   0 5.80802 6.90609   3
   0 -34   0 2.98279 3.12712   1
   0  34   0 0.77671 4.03039   3
   0  34   0 0.22480 3.06291   3
   1 -34   0 17.9859  4.0317   1
  -1 -34   0 14.5041  3.9670   1
  -1  34   0 13.1843  3.5655   3
   1  34   0 19.2780  4.1923   3
   1  34   0 16.7452  3.7428   5
  -1  34   0 17.0474  4.6658   3
   2 -34   0 1.93035 3.27984   1
  -2 -34   0 1.40498 3.49934   1
  -2  34   0 -5.5149  3.6320   3
  -2  34   0 3.91883 2.92849   3
   2  34   0 1.06074 3.34190   5
   2  34   0 8.03535 3.72778   3
  -3 -34   0 32.1401  5.5694   1
   3 -34   0 27.1261  4.9573   1
   3 -34   0 29.3525  4.8297   5
   3  34   0 21.8237  5.1919   3
  -3  34   0 29.9268  4.9560   3
  -3  34   0 29.2207  4.3453   3
  -4 -34   0 8.92660 4.36943   1
   4 -34   0 5.99140 3.75687   5
   4 -34   0 1.12565 3.63160   1
  -4  34   0 7.63119 3.47650   3
   4  34   0 2.72406 3.95535   3
  -4  34   0 8.00610 2.87538   3
  -5 -34   0 2.19549 4.72176   1
   5 -34   0 0.87993 3.67544   1
   5 -34   0 11.5508  4.4450   5
   5  34   0 6.06463 4.55242   3
  -5  34   0 5.68875 2.75906   3
   6 -34   0 6.12128 4.20174   1
   6  34   0 14.1865  5.2310   3
   7 -34   0 6.95175 4.39753   1
   7  34   0 6.08073 5.32087   3
   8 -34   0 14.6047  5.1893   1
  -8 -34   0 19.2648  6.6761   3
   8  34   0 19.4093  6.3823   3
   9 -34   0 0.84358 4.28534   1
  -9 -34   0 -2.0632  6.2405   3
   9  34   0 1.61246 5.77522   3
  10 -34   0 0.77703 4.80279   1
 -10 -34   0 6.93061 6.60520   3
 -11 -34   0 2.61187 7.14513   3
  11 -34   0 -0.3587  5.3134   1
   0 -35   0 5.56018 3.46431   1
   0  35   0 2.41273 3.33245   3
  -1 -35   0 2.38720 3.42230   1
   1 -35   0 8.65113 3.53415   1
  -1  35   0 3.41318 4.17438   3
  -1  35   0 6.03037 3.02855   3
   1  35   0 2.16637 3.37224   3
   1  35   0 2.60863 3.23306   5
   2 -35   0 -3.8897  2.9849   1
  -2 -35   0 -0.1762  3.5665   1
   2  35   0 4.25069 3.63615   5
  -2  35   0 0.58739 3.80192   3
   2  35   0 9.56599 3.72347   3
  -2  35   0 -2.8756  2.6697   3
   3 -35   0 7.67414 3.76489   5
   3 -35   0 0.99030 3.51636   1
  -3 -35   0 7.18551 4.03426   1
  -3  35   0 9.36044 3.82480   3
   3  35   0 1.59522 3.94717   3
  -3  35   0 6.66210 3.00310   3
  -4 -35   0 47.4336  7.0596   1
   4 -35   0 39.6462  6.1118   5
   4 -35   0 42.7113  6.2535   1
   4  35   0 34.4133  6.3160   3
  -4  35   0 37.2879  5.1689   3
  -4  35   0 42.8783  5.5958   3
   5 -35   0 12.2574  4.6361   5
  -5 -35   0 1.77486 4.92983   1
   5 -35   0 5.31371 3.99771   1
  -5  35   0 7.50638 2.93943   3
   5  35   0 4.93411 4.46660   3
   6 -35   0 12.4217  4.6489   1
   6  35   0 21.0975  5.5943   3
   7 -35   0 1.85603 4.11628   1
   7  35   0 0.60908 5.00272   3
  -8 -35   0 10.1211  6.1546   3
   8 -35   0 3.21514 4.62091   1
   8  35   0 0.59220 5.55446   3
  -9 -35   0 -3.8464  6.1378   3
   9 -35   0 5.79670 4.80169   1
   9  35   0 4.70822 5.90242   3
 -10 -35   0 5.89252 6.70882   3
  10 -35   0 1.37597 4.72781   1
 -11 -35   0 -0.7675  7.1464   3
  11 -35   0 -0.8033  5.2975   1
   0 -36   0 168.516  17.053   1
   0  36   0 180.873  17.263   3
  -1 -36   0 4.80073 3.74330   1
   1 -36   0 -5.2893  2.8635   1
  -1  36   0 -3.1553  2.8616   3
   1  36   0 2.29355 3.32458   5
   1  36   0 -2.2111  3.1251   3
  -2 -36   0 18.9488  4.7595   1
   2 -36   0 20.9001  4.5800   1
   2  36   0 23.7897  4.6724   5
  -2  36   0 18.4793  4.7969   3
   2  36   0 14.2991  4.4187   3
  -2  36   0 16.6264  3.8000   3
  -3 -36   0 2.16207 4.01756   1
   3 -36   0 5.98993 3.72016   1
   3 -36   0 1.50177 3.60270   5
   3  36   0 2.02065 4.08825   3
  -3  36   0 1.09477 2.85037   3
  -3  36   0 0.53522 3.72903   3
  -4 -36   0 11.9909  4.9643   1
   4 -36   0 18.4430  4.7157   5
   4 -36   0 19.5054  4.5919   1
  -4  36   0 13.7036  3.3784   3
  -4  36   0 11.7556  3.7892   3
   4  36   0 10.4545  4.5275   3
   5 -36   0 -3.7157  3.5763   1
   5 -36   0 5.20635 4.43380   5
  -5 -36   0 3.21410 4.97142   1
   5  36   0 2.20919 4.41565   3
   6 -36   0 9.76056 4.16030   1
   6 -36   0 -0.4054  4.7944   5
   6  36   0 -8.3505  4.6043   3
   7 -36   0 -3.7246  4.1611   1
   7  36   0 -4.6057  5.0085   3
  -8 -36   0 -0.1198  6.0363   3
   8 -36   0 2.88530 4.70610   1
   8  36   0 2.14369 5.53052   3
  -9 -36   0 41.3051  9.1945   3
   9 -36   0 38.3577  7.1817   1
   9  36   0 40.2656  8.1448   3
 -10 -36   0 -3.7067  6.5462   3
  10 -36   0 5.10575 5.18365   1
  10  36   0 -4.3950  6.0932   3
   0 -37   0 7.30769 3.74085   1
   0  37   0 3.01490 3.33588   3
   1 -37   0 1.08383 3.46913   1
  -1 -37   0 0.47053 3.70123   1
   1  37   0 -1.2537  3.2506   3
  -1  37   0 3.07077 3.27980   3
   1  37   0 2.48658 3.51787   5
   2 -37   0 17.1855  4.5538   1
  -2 -37   0 20.7632  5.1370   1
  -2  37   0 18.8766  4.8422   3
   2  37   0 20.5730  4.6039   3
  -2  37   0 17.8663  3.8999   3
   2  37   0 22.1388  4.7198   5
  -3 -37   0 13.1590  4.8769   1
   3 -37   0 11.3085  4.2601   1
   3 -37   0 13.5665  4.3301   5
  -3  37   0 15.7592  4.4064   3
  -3  37   0 17.3297  3.5711   3
   3  37   0 9.58451 4.45181   3
  -4 -37   0 13.7194  5.1781   1
   4 -37   0 13.3529  4.3881   1
   4 -37   0 13.4393  4.5943   5
  -4  37   0 9.03538 3.72251   3
   4  37   0 7.34617 4.43665   3
  -4  37   0 10.8578  3.2632   3
   5 -37   0 3.08539 4.52696   5
   5 -37   0 1.43206 3.92714   1
   5  37   0 0.07235 4.37740   3
   6 -37   0 -0.9875  3.8476   1
   6 -37   0 -2.0984  4.7895   5
   6  37   0 0.33757 4.96273   3
   7 -37   0 -2.7695  4.1489   1
   7  37   0 0.62199 5.26522   3
  -8 -37   0 3.13504 6.30026   3
   8 -37   0 10.1235  4.8139   1
   8  37   0 2.51569 5.77436   3
   9 -37   0 6.11383 5.30648   1
  -9 -37   0 5.33472 6.73187   3
   9  37   0 12.0228  6.2877   3
 -10 -37   0 1.80886 7.03340   3
  10 -37   0 1.76983 5.09719   1
  10  37   0 -10.422   6.026   3
   0 -38   0 6.50360 3.83486   1
   0  38   0 -2.3697  3.2411   3
  -1 -38   0 74.2228  8.7919   1
   1 -38   0 66.0733  8.1688   1
  -1  38   0 59.9810  7.7915   3
   1  38   0 61.6683  7.8024   5
   1  38   0 60.2020  8.1258   3
  -2 -38   0 -3.1345  4.0160   1
   2 -38   0 7.62895 3.99464   1
  -2  38   0 -0.6939  2.9983   3
   2  38   0 1.28508 3.75788   3
   2  38   0 3.38371 4.21961   5
   3 -38   0 16.6401  4.7009   5
  -3 -38   0 17.8295  5.1645   1
   3 -38   0 13.9900  4.5443   1
   3  38   0 10.7488  4.7964   3
  -3  38   0 15.2790  4.5363   3
  -3  38   0 14.0452  3.7314   3
  -4 -38   0 18.3797  5.4872   1
   4 -38   0 14.9623  4.7058   5
   4 -38   0 15.3064  4.6056   1
  -4  38   0 12.6834  3.3614   3
  -4  38   0 10.0466  3.8336   3
   4  38   0 3.16125 4.43868   3
   5 -38   0 13.1754  4.7517   1
   5  38   0 1.67898 4.70220   3
   6 -38   0 33.4535  5.7878   1
   6  38   0 13.5882  5.8169   3
   7 -38   0 -2.1470  4.1115   1
   7  38   0 -2.5839  5.1245   3
   8 -38   0 141.109  14.508   1
   8  38   0 124.730  15.110   3
   9 -38   0 -5.4950  4.5370   1
  -9 -38   0 -1.3910  6.3797   3
   9  38   0 8.59095 6.20822   3
 -10 -38   0 -0.0882  6.6313   3
  10 -38   0 -0.6624  5.2184   1
  10  38   0 0.48285 6.45962   3
   0 -39   0 3.31411 3.78909   1
   0  39   0 0.68760 3.47579   3
  -1 -39   0 2.87745 3.92544   1
   1 -39   0 3.04387 3.81794   1
   1  39   0 5.33512 4.01362   3
  -1  39   0 7.80456 3.50527   3
   2 -39   0 4.78860 3.96825   1
  -2 -39   0 1.00927 4.16288   1
  -2  39   0 0.46186 3.21014   3
   2  39   0 1.41807 4.07155   3
   3 -39   0 1.90357 3.85243   1
  -3 -39   0 8.91503 4.71590   1
   3  39   0 5.53351 4.31691   3
  -3  39   0 6.08078 3.31484   3
   4 -39   0 6.74584 4.31980   1
  -4 -39   0 -1.6945  4.6118   1
  -4  39   0 3.88301 3.03951   3
   4  39   0 2.82449 4.48350   3
   5 -39   0 42.1536  6.6387   1
   5  39   0 28.2638  6.5510   3
   6 -39   0 15.2723  5.1918   1
   6  39   0 16.5635  5.7201   3
   7 -39   0 14.1418  4.9884   1
   7  39   0 4.59973 5.58708   3
   8 -39   0 9.65419 5.07659   1
   8  39   0 16.4431  6.1491   3
   9 -39   0 4.84360 5.01009   1
   9  39   0 2.91353 5.81856   3
  10 -39   0 3.54129 5.51662   1
 -10 -39   0 -1.4241  7.0515   3
  10  39   0 -1.0853  6.4352   3
   0 -40   0 39.6282  6.4258   1
   0  40   0 35.4741  5.7950   3
  -1 -40   0 -0.1100  3.8674   1
   1 -40   0 -4.4801  3.5094   1
  -1  40   0 3.64395 3.39609   3
   1  40   0 10.7862  4.1529   3
  -2 -40   0 31.5033  6.4192   1
   2 -40   0 42.2061  6.4173   1
   2  40   0 34.8090  6.1101   3
  -2  40   0 38.1302  5.5133   3
  -3 -40   0 2.42858 4.49861   1
   3 -40   0 -6.6770  3.5445   1
  -3  40   0 2.53316 3.37461   3
   3  40   0 -0.8116  3.9693   3
  -4 -40   0 1.60092 4.93953   1
   4 -40   0 8.91686 4.37208   1
   4  40   0 -5.4012  4.2367   3
  -4  40   0 2.19417 3.13732   3
   5 -40   0 26.5097  5.6211   1
   5  40   0 17.5155  5.6633   3
   6 -40   0 -0.6761  4.2824   1
   6  40   0 0.44079 4.75629   3
   7 -40   0 50.5723  7.9085   1
   7  40   0 49.2211  8.3769   3
   8 -40   0 0.24884 4.48868   1
   8  40   0 6.69245 5.65754   3
   9 -40   0 33.6237  6.9672   1
   9  40   0 21.2355  7.2883   3
  10  40   0 -1.7383  6.5464   3
   0 -41   0 9.12901 4.36354   1
   0  41   0 -2.5915  3.5083   3
  -1 -41   0 0.93366 4.25247   1
   1 -41   0 5.56341 4.26032   1
   1  41   0 2.70950 3.79482   3
  -1  41   0 1.40235 3.45585   3
  -2 -41   0 39.7073  6.6250   1
   2 -41   0 22.9821  5.5898   1
  -2  41   0 31.0801  5.0627   3
   2  41   0 30.7305  5.8431   3
  -3 -41   0 16.5604  5.5607   1
   3 -41   0 21.4554  5.1969   1
   3  41   0 15.4015  4.9263   3
  -3  41   0 13.9244  3.8316   3
   4 -41   0 5.71668 4.43328   1
  -4 -41   0 6.43645 5.08449   1
   4  41   0 0.06903 4.60029   3
  -4  41   0 10.7720  3.3848   3
   5 -41   0 25.4789  5.5421   1
   5  41   0 10.3867  5.4149   3
   6 -41   0 7.38603 4.65532   1
   6  41   0 9.08836 5.32825   3
   7 -41   0 18.1543  5.5900   1
   7  41   0 12.0228  5.9042   3
   8 -41   0 6.79887 5.03400   1
   8  41   0 6.20741 5.77297   3
   9 -41   0 -3.1303  4.8356   1
   9  41   0 -6.0347  5.8484   3
   0 -42   0 -1.2635  4.0182   1
   0  42   0 1.71081 3.86460   3
  -1 -42   0 -3.9259  4.0900   1
   1 -42   0 4.29563 4.15146   1
   1  42   0 2.49778 3.97425   3
  -1  42   0 -0.0511  3.4618   3
  -2 -42   0 2.57799 4.59377   1
   2 -42   0 13.8108  4.7430   1
   2  42   0 5.81420 4.35871   3
  -2  42   0 2.87157 3.52669   3
   3 -42   0 101.285  10.156   1
  -3 -42   0 75.1781 10.4551   1
  -3  42   0 77.5106  8.8470   3
   3  42   0 70.5375  9.8467   3
   4 -42   0 -7.6112  3.9992   1
  -4 -42   0 3.62850 5.04045   1
  -4  42   0 3.05601 3.00844   3
   4  42   0 -2.0156  4.3723   3
   5 -42   0 7.02089 4.72241   1
   5  42   0 3.36288 4.90817   3
   6 -42   0 59.0183  8.1333   1
   6  42   0 37.8124  7.5839   3
   7 -42   0 -0.1214  4.5954   1
   7  42   0 -3.4299  5.3509   3
   8 -42   0 58.9738  8.3734   1
   8  42   0 36.2655  8.2424   3
   9 -42   0 7.14583 5.52434   1
   9  42   0 6.81762 6.42078   3
   0 -43   0 0.99488 4.39460   1
   0  43   0 -0.8530  3.6460   3
   1 -43   0 4.05346 4.18552   1
  -1 -43   0 1.28102 4.46512   1
   1  43   0 2.02709 4.02419   3
  -1  43   0 -0.7164  3.3443   3
   2 -43   0 11.6805  4.7553   1
  -2 -43   0 7.03300 4.96147   1
   2  43   0 5.14920 4.39998   3
  -2  43   0 17.9370  4.0590   3
  -3 -43   0 81.5278 10.8003   1
   3 -43   0 80.9451 10.4078   1
   3  43   0 94.7169 10.6013   3
  -3  43   0 89.9286  9.4736   3
   4 -43   0 13.6190  4.9886   1
   4  43   0 11.6882  5.0130   3
   5 -43   0 8.02371 4.92971   1
   5  43   0 2.81941 5.08602   3
   6 -43   0 24.3487  6.0618   1
   6  43   0 22.1554  6.3436   3
   7 -43   0 6.95671 5.19239   1
   7  43   0 0.45333 5.57964   3
   8 -43   0 2.78877 5.32487   1
   8  43   0 4.07506 6.01131   3
   9 -43   0 7.01163 5.68543   1
   9  43   0 7.62621 6.72880   3
   0 -44   0 0.35921 4.41380   1
   0  44   0 12.5996  4.3210   3
   1 -44   0 -3.6587  3.8966   1
  -1 -44   0 18.3973  5.2140   1
   1  44   0 6.89492 4.23335   3
  -1  44   0 -1.4463  3.4987   3
  -2 -44   0 68.7606  9.1954   1
   2 -44   0 72.1246  8.7056   1
  -2  44   0 60.2584  7.6375   3
   2  44   0 52.2434  8.0558   3
  -3 -44   0 8.46691 5.47857   1
   3 -44   0 12.9517  5.1183   1
  -3  44   0 6.73706 3.49684   3
   3  44   0 8.37755 4.79912   3
   4 -44   0 -1.7485  4.3216   1
   4  44   0 10.8862  4.9486   3
   5 -44   0 13.4445  5.3196   1
   5  44   0 3.91069 5.16447   3
   6 -44   0 -1.1959  4.7765   1
   6  44   0 0.92604 5.32170   3
   7 -44   0 8.78729 5.47373   1
   7  44   0 3.89589 5.65319   3
   8 -44   0 -2.4937  4.8387   1
   8  44   0 -6.1006  5.5674   3
   9  44   0 25.3731  7.7306   3
   0 -45   0 2.80340 4.76480   1
   0  45   0 1.78045 4.00894   3
  -1 -45   0 4.46865 4.66741   1
   1 -45   0 1.89900 4.36309   1
  -1  45   0 2.35930 3.72313   3
   1  45   0 7.17372 4.13491   3
  -2 -45   0 10.3419  5.2242   1
   2 -45   0 10.3370  4.9342   1
   2  45   0 9.98196 4.50288   3
  -2  45   0 10.7712  3.9751   3
   3 -45   0 1.64830 4.53347   1
  -3 -45   0 8.57415 5.37905   1
  -3  45   0 3.41986 3.27639   3
   3  45   0 5.32990 4.59799   3
   4 -45   0 0.88587 4.65142   1
   4  45   0 0.76698 4.60850   3
   5 -45   0 21.4585  5.8372   1
   5  45   0 5.52433 5.22316   3
   6 -45   0 10.6420  5.5007   1
   6  45   0 6.27898 5.43525   3
   7 -45   0 9.79925 5.45711   1
   7  45   0 3.96885 5.80442   3
   8 -45   0 2.00014 5.45840   1
   8  45   0 3.08499 5.92565   3
   0 -46   0 -7.6249  4.3100   1
   0  46   0 8.35247 4.13604   3
  -1 -46   0 -1.9247  4.5810   1
   1 -46   0 5.35946 4.79024   1
  -1  46   0 5.52487 3.86949   3
   1  46   0 6.73940 4.27768   3
   2 -46   0 5.50623 4.58002   1
  -2 -46   0 4.26010 4.99002   1
   2  46   0 -8.9184  3.7521   3
  -2  46   0 -0.0724  3.4810   3
  -3 -46   0 2.98044 5.24982   1
   3 -46   0 5.30075 4.70914   1
   3  46   0 3.36639 4.41986   3
  -3  46   0 -0.9390  3.2592   3
   4 -46   0 3.21399 4.62774   1
   4  46   0 -6.4881  4.3334   3
   5 -46   0 -1.4292  4.5521   1
   5  46   0 15.3751  5.3478   3
   6 -46   0 11.6209  5.8271   1
   6  46   0 6.68665 5.41724   3
   7 -46   0 3.80078 5.34772   1
   7  46   0 -0.1656  5.6721   3
   8 -46   0 3.71670 5.76388   1
   8  46   0 11.0600  6.2796   3
   0 -47   0 4.24150 5.04572   1
   0  47   0 -5.1033  3.5704   3
  -1 -47   0 -0.3220  5.0683   1
   1 -47   0 1.30579 4.66223   1
   1  47   0 -4.1502  3.8501   3
  -1  47   0 -0.9748  3.6066   3
   2 -47   0 19.6344  5.4817   1
  -2 -47   0 10.9786  5.8409   1
  -2  47   0 7.60698 3.76289   3
   2  47   0 5.36617 4.47025   3
   3 -47   0 -4.7228  4.3239   1
   3  47   0 -0.7311  4.2200   3
   4 -47   0 24.6988  6.2487   1
   4  47   0 26.6638  6.0985   3
   5 -47   0 16.4972  5.4500   1
   5  47   0 9.41326 5.27080   3
   6 -47   0 8.54606 5.59569   1
   6  47   0 -0.4646  5.1989   3
   7 -47   0 4.34591 5.55532   1
   7  47   0 -11.140   5.206   3
   8  47   0 -4.3520  5.6629   3
   0 -48   0 67.6544  8.8832   1
   0  48   0 44.1559  7.0384   3
  -1 -48   0 3.57344 5.49539   1
   1 -48   0 -3.9019  4.4139   1
   1  48   0 -2.1238  3.9122   3
  -1  48   0 -1.6887  3.6372   3
   2 -48   0 2.76438 4.95968   1
  -2 -48   0 5.11785 5.45566   1
  -2  48   0 4.04838 3.63404   3
   2  48   0 5.02656 4.46884   3
   3 -48   0 5.39703 5.09481   1
   3  48   0 2.26242 4.50208   3
   4 -48   0 -0.0331  4.7563   1
   4  48   0 4.93057 4.90070   3
   5 -48   0 2.65798 4.93908   1
   5  48   0 -3.7433  4.9118   3
   6 -48   0 3.30754 5.51162   1
   6  48   0 -0.3608  5.2748   3
   7 -48   0 2.64233 5.52310   1
   7  48   0 5.67491 5.75411   3
   0 -49   0 4.29813 5.17946   1
   0  49   0 2.87289 3.85118   3
   1 -49   0 2.71919 4.78193   1
  -1 -49   0 1.60052 5.16081   1
   1  49   0 7.74693 4.28170   3
  -1  49   0 -4.2847  3.4836   3
   2 -49   0 8.59456 5.33846   1
  -2 -49   0 1.99224 5.61368   1
  -2  49   0 2.63691 3.47086   3
   2  49   0 1.49431 4.44465   3
   3 -49   0 -0.7891  4.7631   1
   3  49   0 2.08331 4.60108   3
   4 -49   0 4.07362 5.24545   1
   4  49   0 9.40010 5.24114   3
   5 -49   0 0.13431 5.31660   1
   5  49   0 -3.6415  4.8881   3
   6 -49   0 -1.6257  5.4217   1
   6  49   0 4.71833 5.38976   3
   7 -49   0 5.45096 6.17620   1
   7  49   0 2.40035 5.74983   3
   0 -50   0 6.10173 5.42943   1
   0  50   0 -2.8446  3.7610   3
   1 -50   0 31.8208  6.8881   1
  -1 -50   0 27.7017  7.0601   1
   1  50   0 31.6685  5.7453   3
  -1  50   0 16.2631  4.7608   3
   2 -50   0 5.59043 5.32771   1
   2  50   0 3.13337 4.45994   3
  -2  50   0 3.68833 3.51091   3
   3 -50   0 0.91610 5.14465   1
   3  50   0 6.22298 4.68298   3
   4 -50   0 1.48054 5.32113   1
   4  50   0 -0.7092  4.6829   3
   5 -50   0 2.29698 5.61720   1
   5  50   0 0.97474 5.15440   3
   6 -50   0 4.95124 5.78781   1
   6  50   0 1.62529 5.33818   3
   0 -51   0 4.17316 5.86083   1
   0  51   0 -0.2314  3.7404   3
  -1 -51   0 -0.4933  5.5572   1
   1 -51   0 6.10939 5.47091   1
  -1  51   0 4.53083 3.81267   3
   1  51   0 1.48237 4.19590   3
   2 -51   0 6.41248 5.44042   1
   2  51   0 4.29105 4.54286   3
  -2  51   0 4.44723 3.64847   3
   3 -51   0 15.0912  6.1269   1
   3  51   0 16.1922  5.5193   3
   4 -51   0 0.92695 5.66421   1
   4  51   0 3.06792 4.82089   3
   5 -51   0 5.49235 5.87555   1
   5  51   0 -0.5174  4.9441   3
   6 -51   0 0.11662 5.85587   1
   6  51   0 4.11586 5.50764   3
   0 -52   0 92.2754 11.3127   1
   0  52   0 67.9403  8.9571   3
   1 -52   0 3.22980 5.63147   1
  -1 -52   0 2.48058 5.83805   1
  -1  52   0 2.65025 3.77771   3
   1  52   0 -1.6841  4.1224   3
   2 -52   0 11.4995  5.8772   1
   2  52   0 15.7433  5.0232   3
  -2  52   0 1.90394 3.62034   3
   3 -52   0 17.1841  6.3338   1
   3  52   0 12.6983  5.3537   3
   4 -52   0 2.62735 5.54736   1
   4  52   0 12.6975  5.5059   3
   5 -52   0 0.52857 6.00218   1
   5  52   0 7.39147 5.40266   3
   0 -53   0 1.26414 5.85445   1
   0  53   0 -2.6667  3.9687   3
   1 -53   0 11.9366  6.3942   1
   1  53   0 11.1297  4.5733   3
  -1  53   0 17.2583  4.5519   3
   2 -53   0 5.02362 5.66422   1
  -2  53   0 3.81375 3.65670   3
   2  53   0 3.48653 4.68977   3
   3 -53   0 69.3737 10.4643   1
   3  53   0 74.2142  9.5768   3
   4 -53   0 22.6626  6.7846   1
   4  53   0 7.11921 5.51067   3
   5 -53   0 0.89079 5.82756   1
   5  53   0 14.9692  6.0256   3
   0 -54   0 5.59883 6.09311   1
   0  54   0 1.31662 4.11637   3
   1 -54   0 93.9696 12.3623   1
  -1  54   0 87.6893  9.8837   3
   1  54   0 83.5879 10.2773   3
   2 -54   0 -1.0668  5.7281   1
   2  54   0 1.38510 4.38335   3
   3 -54   0 45.0389  8.3058   1
   3  54   0 26.3180  6.4698   3
   4 -54   0 8.12167 6.33017   1
   4  54   0 5.49101 5.40208   3
   0  55   0 10.9940  4.5428   3
   1 -55   0 5.11444 6.34362   1
  -1  55   0 2.52368 3.87156   3
   1  55   0 1.16374 4.30653   3
   2 -55   0 6.37313 6.29480   1
   2  55   0 5.90660 4.60160   3
   3 -55   0 10.4717  6.6621   1
   3  55   0 8.17985 5.04159   3
   0  56   0 253.332  24.465   3
   1 -56   0 -6.8861  6.1482   1
  -1  56   0 4.06698 4.06080   3
   1  56   0 0.60419 4.21837   3
   2 -56   0 1.27549 6.10321   1
   2  56   0 -4.0198  4.3379   3
   0  57   0 5.93600 4.57067   3
   1  57   0 3.77507 4.55482   3
  -1  57   0 1.43531 4.04759   3
 -14   0   1 3.06642 4.86312   3
 -13   0   1 -1.4843  4.6901   3
 -12   0   1 -8.8339  4.2971   3
 -12   0   1 -2.6864  3.3546   6
  12   0  -1 3.33948 4.97536   1
  12   0  -1 -4.7713  3.7647   2
 -11   0   1 16.0833  5.3398   3
 -11   0   1 7.37425 4.01572   6
  11   0  -1 6.05202 4.95266   1
  11   0  -1 10.2967  4.2395   2
 -10   0   1 -10.400   3.928   3
  10   0  -1 2.27300 4.14191   1
 -10   0   1 4.25847 3.87528   6
  10   0  -1 -1.8885  3.4417   2
  -9   0   1 7.93360 4.04566   6
  -9   0   1 3.01408 4.23566   3
   9   0  -1 0.76297 3.40530   1
   9   0  -1 2.96561 3.43664   2
  -8   0   1 -1.8575  3.6868   3
   8   0  -1 -0.9788  2.8516   2
   8   0  -1 1.08974 3.97400   3
  -8   0   1 -0.9402  3.6053   6
   8   0  -1 -4.1553  2.6329   1
  -7   0   1 6.03616 3.77711   6
   7   0  -1 2.44623 2.92154   2
   7   0  -1 7.76152 3.84856   3
   7   0  -1 4.36120 2.93337   1
  -7   0   1 14.3952  4.3726   3
   6   0  -1 -1.6159  3.5479   3
  -6   0   1 -0.9991  3.8770   3
   6   0  -1 4.75917 3.33464   2
   6   0  -1 3.29112 2.82966   1
  -6   0   1 3.40093 3.95657   6
   5   0  -1 0.25435 2.44574   1
   5   0  -1 3.84987 3.23065   3
   5   0  -1 9.78582 3.21455   2
  -5   0   1 3.56846 3.50391   6
  -5   0   1 7.74334 3.88854   3
  -4   0   1 -0.0168  2.4862   3
   4   0  -1 1.23484 2.06953   2
  -4   0   1 -2.4903  2.4080   6
   4   0  -1 3.35731 2.14164   3
   4   0  -1 0.86412 1.59923   1
  -3   0   1 0.12721 2.27132   3
   3   0  -1 -1.4404  1.8809   3
   3   0  -1 1.74009 1.42591   1
   3   0  -1 -0.4961  1.8787   2
   2   0  -1 -0.5793  1.4098   1
   2   0  -1 -4.9577  1.7403   2
  -2   0   1 -5.4985  2.1085   3
   2   0  -1 9.05641 1.87621   3
   1   0  -1 -0.5672  0.4772   2
  -1   0   1 0.17721 0.59011   3
   1   0  -1 -0.2436  0.4320   1
   1   0  -1 0.14874 0.41703   3
   1   0  -1 -0.8677  0.7529   6
   0   0   1 -0.4256  0.2060   5
   0   0  -1 -0.6749  0.2647   4
   0   0  -1 -0.7178  0.1898   5
   1   0   1 -0.7575  0.2670   1
  -2   0  -1 1.90402 1.07911   3
  -2   0  -1 1.02031 1.50862   3
   2   0   1 1.17411 0.86754   2
   2   0   1 -1.0746  0.7729   1
   3   0   1 -0.5833  0.9114   1
   3   0   1 0.27114 1.01101   2
  -3   0  -1 -0.6433  1.6160   3
  -3   0  -1 1.43283 1.20635   3
  -4   0  -1 -0.3118  1.3112   6
  -4   0  -1 5.42459 2.19139   3
  -4   0  -1 1.37522 1.56398   3
   4   0   1 -0.9265  1.1304   1
   4   0   1 2.61366 1.37570   2
   5   0   1 7.98517 2.24483   2
  -5   0  -1 6.41680 2.52990   3
   5   0   1 0.26095 2.14195   1
  -5   0  -1 2.74597 3.29647   3
  -5   0  -1 3.40318 2.19709   6
  -6   0  -1 1.97999 2.19476   6
   6   0   1 1.34411 2.33074   1
  -6   0  -1 0.40280 2.57188   3
  -6   0  -1 -3.1736  3.2233   3
   6   0   1 1.57326 3.16750   3
   6   0   1 -0.0019  2.2155   2
  -7   0  -1 0.68388 2.63852   3
  -7   0  -1 5.45404 3.18466   3
   7   0   1 -0.2615  2.2154   2
   7   0   1 4.00886 2.43434   1
   7   0   1 -0.9320  3.2153   3
  -8   0  -1 -1.1794  2.9344   3
   8   0   1 0.75697 2.57460   1
   8   0   1 0.11870 2.35001   2
  -8   0  -1 2.18602 3.13157   3
   9   0   1 5.68174 3.51611   1
   9   0   1 9.92397 3.19639   2
  -9   0  -1 9.70897 4.03936   3
  10   0   1 -1.8663  3.7383   1
 -10   0  -1 3.99435 3.85783   3
  10   0   1 2.64330 3.22938   2
  11   0   1 2.48312 4.27422   1
 -11   0  -1 1.76809 3.75583   3
  12   0   1 2.57442 4.85214   1
 -12   0  -1 6.91616 4.04411   3
 -13   0  -1 1.71812 4.01579   3
  13   0   1 1.69989 5.51256   1
 -14  -1   1 -0.8903  4.9281   3
 -14   1   1 -5.9012  4.5225   3
 -13  -1   1 9.03289 5.29906   3
 -13   1   1 3.94902 4.85376   3
 -12  -1   1 -5.0822  4.6030   3
  12  -1  -1 -5.1016  3.7676   2
 -12  -1   1 -1.2384  3.5248   6
  12  -1  -1 -6.6146  4.5590   1
 -12   1   1 -0.3514  3.1407   6
  12   1  -1 0.11033 3.89235   2
  12   1  -1 2.51944 5.08667   1
 -12   1   1 -0.0545  4.4767   3
 -11  -1   1 26.2481  5.7607   3
  11  -1  -1 7.57009 4.95289   1
 -11  -1   1 5.18762 4.06936   6
  11  -1  -1 11.4419  4.3643   2
 -11   1   1 9.37816 4.92258   3
  11   1  -1 10.3572  5.2456   1
  11   1  -1 7.18497 4.05088   2
 -11   1   1 11.8627  4.0093   6
 -10  -1   1 5.19172 4.22159   6
  10  -1  -1 -9.6358  3.6516   1
 -10  -1   1 -3.6867  4.3726   3
  10  -1  -1 -1.8605  3.6005   2
  10   1  -1 -0.4213  3.5344   2
 -10   1   1 -2.4512  4.3119   3
  10   1  -1 -1.9270  3.9209   1
 -10   1   1 2.29121 3.63107   6
   9  -1  -1 6.31012 3.67875   2
  -9  -1   1 0.65028 3.92527   6
   9  -1  -1 5.01416 3.84291   1
  -9  -1   1 -1.8395  4.1479   3
   9   1  -1 8.58750 3.87441   1
  -9   1   1 3.05339 3.70594   6
   9   1  -1 4.82219 3.27367   2
  -9   1   1 1.05520 4.13896   3
   9   1  -1 1.61212 4.84391   3
   8  -1  -1 0.37590 4.00719   3
  -8  -1   1 3.53370 4.08694   3
  -8  -1   1 11.2530  3.9250   6
   8  -1  -1 -0.5797  3.0895   1
   8  -1  -1 6.16259 3.32882   2
   8   1  -1 5.40892 3.09501   1
   8   1  -1 4.36890 4.08116   3
   8   1  -1 5.57695 3.12282   2
  -8   1   1 7.54141 4.01248   3
  -8   1   1 6.95871 3.72058   6
   7  -1  -1 25.9241  4.3912   2
   7  -1  -1 18.5725  4.6630   3
   7  -1  -1 22.8249  4.2225   1
  -7  -1   1 22.4829  5.0420   3
  -7  -1   1 16.2819  4.7080   6
  -7   1   1 22.5635  4.1621   3
   7   1  -1 22.4981  4.2563   2
  -7   1   1 30.9029  4.8332   6
   7   1  -1 22.6826  4.1499   1
   7   1  -1 23.5865  4.7587   3
  -7   1   1 20.0573  4.9664   3
  -6  -1   1 5.90306 4.22127   3
   6  -1  -1 0.06258 2.74301   1
  -6  -1   1 -2.0001  3.7840   6
   6  -1  -1 7.76164 3.84876   3
   6  -1  -1 -2.4596  3.0256   2
   6   1  -1 -1.5140  2.6364   1
   6   1  -1 -2.0155  3.5405   3
   6   1  -1 6.24989 3.33395   2
  -6   1   1 6.21383 3.79583   6
  -6   1   1 8.77602 4.33126   3
   5  -1  -1 31.0074  4.4494   2
   5  -1  -1 26.4574  3.9567   1
  -5  -1   1 14.1785  4.6047   3
  -5  -1   1 25.2898  4.8185   6
   5  -1  -1 31.2666  4.5719   3
  -5   1   1 24.3431  5.0898   3
   5   1  -1 19.7494  3.8245   1
   5   1  -1 29.4858  4.5071   3
  -5   1   1 30.0338  4.8717   6
   5   1  -1 24.1254  4.2359   2
   4  -1  -1 52.7527  7.1816   2
   4  -1  -1 64.9309  6.9195   1
  -4  -1   1 79.3610  7.8454   6
   4  -1  -1 71.3043  7.2015   3
  -4  -1   1 74.8650  7.7038   3
  -4   1   1 59.7618  7.4858   6
   4   1  -1 69.6282  7.2436   2
   4   1  -1 66.4942  6.8411   1
  -4   1   1 61.7468  7.7065   3
   4   1  -1 77.6262  7.2868   3
  -3  -1   1 27.9075  4.4189   3
   3  -1  -1 47.5745  4.1313   1
   3  -1  -1 25.7632  3.9611   2
   3   1  -1 33.5895  3.8359   1
  -3   1   1 23.5359  4.2418   3
   3   1  -1 38.5180  4.5165   2
   2  -1  -1 28.2556  3.1833   1
   2  -1  -1 31.6840  3.6782   3
   2  -1  -1 22.0289  3.2854   2
  -2  -1   1 17.3244  3.4825   3
  -2   1   1 21.4757  3.4650   3
   2   1  -1 29.3127  3.2929   1
   2   1  -1 26.3061  3.1900   3
   1  -1  -1 0.60106 0.49262   1
  -1  -1   1 -0.1729  0.5413   3
   1  -1  -1 0.19065 0.48220   2
   1  -1  -1 0.14629 0.41764   3
   1   1  -1 -0.9776  0.7304   6
   1   1  -1 0.17925 0.34012   1
   1   1  -1 0.01041 0.48774   2
   1   1  -1 0.58721 0.43725   3
  -1   1   1 0.11705 0.57139   3
   0  -1   1 0.13957 0.22390   5
   0  -1  -1 -0.2890  0.3534   3
   0  -1  -1 -0.1946  0.2691   4
   0  -1  -1 0.29617 0.20067   5
   0   1  -1 -0.1472  0.2400   4
   0   1   1 0.28449 0.18507   5
   0   1  -1 -0.0782  0.1913   5
   0   1  -1 0.02935 0.29964   2
   0   1   1 0.42388 0.18598   1
  -1  -1  -1 2.75234 0.56377   3
  -1  -1  -1 2.73864 0.81612   3
  -1  -1  -1 0.51640 0.73735   4
   1   1   1 4.55189 0.55446   1
   2  -1   1 0.44865 0.81260   1
   2  -1   1 0.61413 0.83137   2
  -2  -1  -1 -0.7422  1.6707   3
  -2  -1  -1 0.11584 1.15119   3
  -2   1  -1 2.04706 1.27783   3
  -2   1  -1 1.24941 0.97594   3
   2   1   1 0.82146 0.88460   1
   2   1   1 3.45413 0.96128   2
  -3  -1  -1 21.7613  3.0124   6
  -3  -1  -1 29.2698  3.3928   3
  -3  -1  -1 19.8317  3.4448   3
   3  -1   1 25.8721  3.0150   2
   3  -1   1 25.1467  2.9866   1
  -3   1  -1 23.9431  3.1641   3
  -3   1  -1 30.1764  3.1357   3
   3   1   1 26.6069  2.9542   1
   3   1   1 30.0220  3.0127   2
  -4  -1  -1 51.2852  5.0159   3
   4  -1   1 37.8419  4.6080   1
  -4  -1  -1 47.8800  5.6892   3
  -4  -1  -1 49.3360  4.9749   6
   4  -1   1 43.4536  4.6641   2
   4   1   1 40.1959  4.6221   1
  -4   1  -1 37.6459  5.2728   3
  -4   1  -1 40.0908  4.8784   3
   4   1   1 47.4800  4.6824   2
  -5  -1  -1 10.6688  2.9034   3
  -5  -1  -1 13.9100  2.9853   6
   5  -1   1 6.76681 2.52663   1
  -5  -1  -1 13.2088  3.8813   3
   5  -1   1 9.53331 2.58313   2
  -5   1  -1 15.4892  2.8505   3
  -5   1  -1 15.6278  3.6413   3
   5   1   1 11.9941  2.6174   2
   5   1   1 14.3169  2.7636   1
   6  -1   1 49.2619  5.5409   2
   6  -1   1 38.8156  5.2684   1
  -6  -1  -1 37.9542  6.0149   3
  -6  -1  -1 52.8187  6.0425   3
  -6  -1  -1 51.5937  5.6533   6
  -6   1  -1 34.3548  5.1791   3
   6   1   1 64.5563  6.5238   3
   6   1   1 35.6770  4.9836   2
   6   1   1 52.5668  5.6983   1
  -6   1  -1 36.4258  5.6768   3
  -7  -1  -1 -2.9062  3.1083   3
   7  -1   1 2.26742 2.24670   2
   7  -1   1 -0.0936  2.2166   1
   7  -1   1 3.06943 3.35783   3
  -7  -1  -1 0.36268 2.06227   6
  -7  -1  -1 4.75542 2.76338   3
  -7   1  -1 0.42535 2.89435   3
  -7   1  -1 -0.5478  2.5289   3
   7   1   1 2.49289 2.38922   1
   7   1   1 -3.4686  3.1818   3
   7   1   1 -5.2531  1.9780   2
  -8  -1  -1 -1.9533  3.2177   3
   8  -1   1 6.08431 2.61900   2
  -8  -1  -1 1.20875 3.02926   3
   8  -1   1 -0.3808  2.5143   1
  -8   1  -1 6.32149 3.26282   3
  -8   1  -1 -0.8834  2.8768   3
   8   1   1 1.80940 2.63871   1
   8   1   1 1.84448 2.49308   2
   9  -1   1 27.5031  4.4409   1
  -9  -1  -1 18.4050  4.4270   3
   9  -1   1 1.75338 2.98160   2
   9   1   1 9.57054 3.59184   1
  -9   1  -1 10.2264  3.8877   3
   9   1   1 5.39463 3.17415   2
 -10  -1  -1 17.4497  5.0240   3
  10  -1   1 22.2060  5.1492   1
  10  -1   1 20.2708  4.2401   2
  10   1   1 25.7153  4.3644   2
 -10   1  -1 20.6954  4.8198   3
  10   1   1 28.8376  5.4022   1
  11  -1   1 5.41574 4.32870   1
 -11  -1  -1 -1.4309  3.6452   3
 -11   1  -1 5.59784 3.81063   3
  11   1   1 -3.2125  3.9532   1
  11   1   1 -2.2964  3.1395   2
 -12  -1  -1 61.4245  8.1851   3
  12  -1   1 45.3240  8.5922   1
  12   1   1 62.7286  8.9571   1
 -12   1  -1 67.6417  7.9988   3
 -13  -1  -1 44.6053  6.7609   3
  13  -1   1 42.1870  8.1626   1
 -13   1  -1 31.9633  5.9712   3
  13   1   1 42.8473  8.1609   1
 -14  -2   1 1.59129 5.04801   3
 -14   2   1 4.11208 4.74449   3
 -13  -2   1 1.77208 5.22549   3
 -13   2   1 7.68457 4.84685   3
 -12  -2   1 13.7433  4.4212   6
 -12  -2   1 14.2355  5.6645   3
  12  -2  -1 13.1505  4.8027   2
  12  -2  -1 21.1079  6.1671   1
 -12   2   1 13.1626  5.3846   3
  12   2  -1 25.7280  6.4349   1
  12   2  -1 18.5636  4.8189   2
  11  -2  -1 3.64566 4.05739   2
  11  -2  -1 -1.5033  4.3839   1
 -11  -2   1 4.80633 4.06460   6
 -11  -2   1 1.82064 4.85453   3
 -11   2   1 1.70476 4.54390   3
  11   2  -1 11.1572  5.0101   1
  11   2  -1 -0.1133  3.6863   2
 -11   2   1 4.99877 3.44779   6
  10  -2  -1 1.91704 4.09998   1
  10  -2  -1 -0.4536  3.6387   2
 -10  -2   1 -1.8768  4.6748   3
 -10  -2   1 -0.9847  4.3288   6
 -10   2   1 9.32315 4.77544   3
  10   2  -1 0.16387 3.43184   2
  10   2  -1 4.13039 4.16899   1
 -10   2   1 4.87331 3.59696   6
  -9  -2   1 4.36040 4.20558   6
   9  -2  -1 4.13555 3.44190   2
   9  -2  -1 6.78923 3.78042   1
  -9  -2   1 1.80865 4.48867   3
  -9   2   1 -0.5005  3.2777   6
   9   2  -1 -0.4736  3.0320   2
   9   2  -1 3.38471 4.81174   3
   9   2  -1 -1.5784  3.4820   1
  -9   2   1 -8.3433  3.5479   3
   8  -2  -1 7.27655 4.19972   3
   8  -2  -1 12.6640  3.5793   1
  -8  -2   1 10.4196  4.2920   6
  -8  -2   1 17.1751  4.8414   3
   8  -2  -1 -1.0440  3.0260   2
   8   2  -1 8.75463 3.37226   1
   8   2  -1 7.67595 3.35323   2
  -8   2   1 6.52497 3.59684   6
   8   2  -1 15.8317  4.5597   3
  -8   2   1 9.44268 4.22276   3
   7  -2  -1 9.37053 3.33554   2
   7  -2  -1 9.29239 3.28010   1
  -7  -2   1 3.61446 3.94537   6
   7  -2  -1 0.62324 3.56346   3
  -7  -2   1 10.4689  4.1976   3
   7   2  -1 7.12984 3.79619   3
   7   2  -1 3.22514 3.08701   2
  -7   2   1 7.45477 3.55666   6
  -7   2   1 5.90496 3.38268   3
   7   2  -1 5.83371 2.90441   1
  -7   2   1 3.96777 3.82565   3
  -6  -2   1 11.4538  4.1630   6
   6  -2  -1 6.64489 3.56484   2
   6  -2  -1 11.4582  4.0934   3
   6  -2  -1 8.75735 3.31176   1
  -6  -2   1 5.90571 4.25387   3
   6   2  -1 9.15261 3.35989   2
  -6   2   1 2.75553 3.79266   6
  -6   2   1 13.9811  4.5378   3
   6   2  -1 4.88946 3.77070   3
   6   2  -1 7.09110 3.06607   1
   5  -2  -1 25.3114  4.3793   3
   5  -2  -1 20.2871  3.7601   1
  -5  -2   1 22.9170  4.9703   3
   5  -2  -1 24.2961  4.2923   2
  -5  -2   1 22.3400  4.9300   6
   5   2  -1 24.2738  4.0674   2
  -5   2   1 20.2012  4.3651   6
  -5   2   1 22.5312  4.7926   3
   5   2  -1 27.9463  3.8934   1
   5   2  -1 20.6223  4.1850   3
   4  -2  -1 37.0890  4.6148   2
   4  -2  -1 39.9714  4.7804   3
   4  -2  -1 36.1637  4.4951   1
  -4  -2   1 29.0042  4.9063   3
  -4   2   1 32.7638  4.8806   3
  -4   2   1 32.0269  4.6501   6
   4   2  -1 44.7129  4.7915   3
   4   2  -1 42.9436  4.5355   1
   4   2  -1 31.7758  4.3587   2
  -3  -2   1 856.398  88.461   3
   3  -2  -1 1043.42   88.31   3
   3  -2  -1 960.145  86.373   2
   3  -2  -1 1038.18   86.38   1
   3   2  -1 1047.35   88.31   3
  -3   2   1 863.372  88.601   6
   3   2  -1 990.817  86.330   1
   3   2  -1 1002.61   86.35   2
  -3   2   1 921.673  88.461   3
   2  -2  -1 -0.1727  1.9456   2
   2  -2  -1 9.18157 1.95382   3
  -2  -2   1 0.81239 2.15227   3
   2  -2  -1 4.28290 1.52926   1
   2   2  -1 5.28182 1.50301   1
   2   2  -1 -0.2047  1.7884   2
   2   2  -1 -0.5870  2.1594   6
  -2   2   1 6.68135 2.22167   3
   2   2  -1 6.07652 1.93475   3
   1  -2  -1 1323.64  116.30   1
   1   2  -1 1298.49  119.27   6
   0  -2  -1 -0.3333  0.3981   6
   0  -2   1 -0.0161  0.3019   5
   0  -2  -1 -0.1541  0.3575   3
   0   2   1 -0.2728  0.1901   1
   0   2  -1 -0.4400  0.2987   2
   0   2  -1 -0.3982  0.2321   4
   0   2  -1 0.05321 0.24212   5
   0   2   1 -0.2741  0.1565   5
  -1  -2  -1 6.97563 0.94745   3
  -1  -2  -1 6.73601 1.14639   4
  -1  -2  -1 6.16095 1.17284   3
  -1  -2  -1 5.36076 0.95268   6
  -2  -2  -1 3.78234 1.98942   3
   2  -2   1 6.48644 1.13260   1
  -2  -2  -1 9.52954 1.55813   3
   2  -2   1 3.57796 1.21636   2
  -2  -2  -1 3.46398 1.64064   6
   2   2   1 11.0826  1.3657   1
   2   2   1 9.68338 1.30654   2
   3  -2   1 51.2977  5.2892   2
  -3  -2  -1 44.3874  5.6206   6
   3  -2   1 58.2923  5.2884   1
  -3  -2  -1 56.6213  5.5727   3
  -3  -2  -1 47.0275  5.9155   3
   3   2   1 60.0509  5.2938   1
  -3   2  -1 58.4285  5.3752   3
   3   2   1 59.1089  5.2451   2
  -3   2  -1 42.2096  5.5450   3
   4  -2   1 116.133  10.112   2
  -4  -2  -1 90.3290 10.7585   3
  -4  -2  -1 116.003  10.455   3
   4  -2   1 104.785  10.114   1
  -4  -2  -1 83.2076 10.4509   6
   4   2   1 112.447  10.142   1
  -4   2  -1 101.126  10.614   3
   4   2   1 117.207  10.089   2
  -4   2  -1 120.897  10.357   3
   5  -2   1 0.46948 2.11669   1
  -5  -2  -1 1.47327 3.59809   3
  -5  -2  -1 0.34222 2.72601   6
   5  -2   1 2.05483 2.21996   2
  -5  -2  -1 4.45127 2.56333   3
  -5   2  -1 0.99489 2.33170   3
   5   2   1 -1.5217  2.0273   1
   5   2   1 2.98315 2.16302   2
   5   2   1 -4.0504  2.8333   3
  -5   2  -1 1.44988 2.93633   3
   6  -2   1 143.075  14.355   1
  -6  -2  -1 182.300  15.463   3
  -6  -2  -1 156.876  14.587   6
  -6  -2  -1 145.697  14.728   3
   6  -2   1 139.952  14.164   2
   6   2   1 149.137  14.329   1
  -6   2  -1 151.722  14.603   3
  -6   2  -1 155.439  14.966   3
   6   2   1 150.282  14.133   2
   6   2   1 139.128  14.892   3
   7  -2   1 -2.1280  2.1749   2
   7  -2   1 0.37448 3.29302   3
  -7  -2  -1 7.35699 3.61668   3
   7  -2   1 -0.6775  2.2257   1
  -7  -2  -1 0.99752 2.34286   6
  -7  -2  -1 4.81040 2.80344   3
   7   2   1 -0.0452  3.3588   3
  -7   2  -1 1.82905 2.95921   3
   7   2   1 -0.8176  2.1363   2
  -7   2  -1 1.64519 2.58693   3
   7   2   1 0.60756 2.28290   1
   8  -2   1 16.6399  3.7563   1
  -8  -2  -1 13.6873  4.2312   3
   8  -2   1 16.0115  3.2352   2
  -8  -2  -1 13.4817  3.8178   3
   8   2   1 14.0498  3.2407   2
  -8   2  -1 14.9468  3.5371   3
  -8   2  -1 18.4857  3.9996   3
   8   2   1 13.5563  3.4877   1
   9  -2   1 0.15671 2.65610   2
  -9  -2  -1 -0.9106  3.8194   3
   9  -2   1 2.97186 3.27873   1
  -9   2  -1 4.20767 3.53940   3
  -9   2  -1 3.29368 3.37036   3
   9   2   1 1.03597 3.05769   1
   9   2   1 1.02900 2.79803   2
 -10  -2  -1 77.9279  9.2340   3
  10  -2   1 80.0431  9.2780   1
  10  -2   1 68.6307  8.2883   2
  10   2   1 75.6794  9.3369   1
  10   2   1 63.9253  8.1654   2
 -10   2  -1 81.2851  8.8888   3
 -11  -2  -1 -4.4601  3.7125   3
  11  -2   1 -0.3628  4.0038   1
  11   2   1 6.33927 4.46104   1
 -11   2  -1 2.72586 3.69894   3
  11   2   1 1.08999 3.34261   2
  12  -2   1 86.7622 10.2478   1
 -12  -2  -1 63.7936  8.7161   3
  12   2   1 79.8088  9.9510   1
 -12   2  -1 60.4937  8.4397   3
 -13  -2  -1 67.1298  8.9816   3
  13  -2   1 96.0459 11.2608   1
  13   2   1 89.7058 11.1826   1
 -13   2  -1 63.3673  8.4954   3
 -14  -3   1 3.64188 5.13625   3
 -14   3   1 4.70267 4.76773   3
 -13  -3   1 4.94198 5.47320   3
 -13   3   1 20.8693  5.5132   3
 -12  -3   1 28.9604  5.1228   6
 -12  -3   1 23.6317  6.0604   3
  12  -3  -1 22.5694  6.3657   1
  12  -3  -1 10.7598  4.7506   2
 -12   3   1 17.4043  5.5464   3
  12   3  -1 21.6778  5.0956   2
  11  -3  -1 25.0915  5.7399   1
 -11  -3   1 13.4626  5.8696   3
  11  -3  -1 20.7867  4.9660   2
 -11  -3   1 24.4755  5.3252   6
  11   3  -1 13.2431  4.4748   2
  11   3  -1 18.0863  5.6166   1
 -11   3   1 24.8687  5.5635   3
 -11   3   1 10.5065  3.7876   6
 -10  -3   1 0.92919 4.37777   6
  10  -3  -1 -2.5542  3.5914   2
 -10  -3   1 2.48306 4.85380   3
  10  -3  -1 1.87142 3.94041   1
 -10   3   1 -6.1701  3.0987   6
 -10   3   1 -1.9348  4.2741   3
  10   3  -1 -1.6134  3.8660   1
  10   3  -1 4.21269 3.55243   2
   9  -3  -1 4.75083 3.70410   2
   9  -3  -1 3.99730 3.74624   1
  -9  -3   1 11.8296  5.0853   3
  -9  -3   1 5.60057 4.44996   6
  -9   3   1 13.6704  4.5592   3
  -9   3   1 7.76167 3.65790   6
   9   3  -1 5.22841 5.01804   3
   9   3  -1 9.42905 3.53295   2
   9   3  -1 12.0243  4.0637   1
  -8  -3   1 5.78334 4.27379   3
   8  -3  -1 3.52650 3.13735   1
  -8  -3   1 5.02256 4.25067   6
   8  -3  -1 2.44817 4.09183   3
   8  -3  -1 0.92555 3.01344   2
   8   3  -1 4.48237 3.03470   2
  -8   3   1 -4.5898  3.3159   3
   8   3  -1 2.49565 2.91940   1
   8   3  -1 0.65749 3.93363   3
  -8   3   1 2.33431 3.17717   6
  -7  -3   1 48.4303  6.4070   6
   7  -3  -1 38.1012  6.0085   3
   7  -3  -1 44.8662  5.8209   2
   7  -3  -1 54.0183  6.1807   1
  -7  -3   1 42.1269  6.6500   3
  -7   3   1 37.4493  5.7330   6
  -7   3   1 39.3502  6.1780   3
  -7   3   1 37.3373  5.6753   3
   7   3  -1 42.8037  5.7095   2
   7   3  -1 33.4597  5.4618   1
   7   3  -1 44.8329  6.0906   3
   6  -3  -1 5.45200 3.21535   1
   6  -3  -1 24.2565  4.1340   2
  -6  -3   1 15.7418  4.6647   6
  -6  -3   1 6.77337 4.61547   3
   6  -3  -1 15.9069  4.2936   3
  -6   3   1 3.77884 2.87121   3
   6   3  -1 14.6746  4.0037   3
   6   3  -1 9.15536 3.21391   1
  -6   3   1 15.1363  4.0676   6
  -6   3   1 18.9868  4.6666   3
   6   3  -1 14.4336  3.6372   2
  -5  -3   1 35.6901  5.3755   6
  -5  -3   1 28.9943  5.3081   3
   5  -3  -1 28.3975  4.1482   1
   5  -3  -1 21.7044  4.4137   2
   5  -3  -1 29.3443  4.6495   3
  -5   3   1 25.9001  4.9969   3
   5   3  -1 25.3001  4.2629   2
  -5   3   1 20.9172  4.5445   6
   5   3  -1 30.5519  4.5482   3
   5   3  -1 25.5564  3.9494   1
   4  -3  -1 195.412  17.592   2
   4  -3  -1 154.337  17.139   1
  -4  -3   1 167.419  17.977   3
   4  -3  -1 213.540  17.708   3
  -4   3   1 202.709  18.059   3
   4   3  -1 167.629  17.109   1
   4   3  -1 167.241  17.294   2
   4   3  -1 208.018  17.706   3
  -4   3   1 217.825  17.890   6
  -3  -3   1 437.918  39.733   3
   3  -3  -1 439.724  38.605   1
   3  -3  -1 447.731  38.736   2
   3   3  -1 430.863  39.812   6
   3   3  -1 463.702  38.690   2
  -3   3   1 390.676  39.623   3
  -3   3   1 398.737  39.631   6
   2  -3  -1 177.063  15.024   1
  -2  -3   1 141.622  15.532   3
   2   3  -1 191.414  15.008   1
   2   3  -1 142.119  15.610   6
   2   3  -1 162.175  15.143   2
  -1  -3   1 4.38599 0.94058   1
   1  -3  -1 1.82142 0.72477   3
   1  -3  -1 5.08304 0.80443   1
   1   3  -1 0.47142 0.39942   4
   1   3  -1 2.48270 0.77961   2
   1   3  -1 6.71297 0.93489   3
  -1   3   1 0.86036 0.82236   3
   0  -3  -1 0.51802 0.28901   1
   0  -3   1 1.34958 0.45842   5
   0  -3  -1 -0.2238  0.4758   6
   0   3  -1 0.11646 0.25864   5
   0   3   1 -0.2035  0.3065   3
   0   3  -1 -0.3195  0.2393   4
   0   3  -1 0.36458 0.33142   2
  -1  -3  -1 0.38677 0.93904   6
  -1  -3  -1 0.76467 0.69691   3
  -1  -3  -1 -0.2047  0.8692   4
   1   3   1 0.69084 0.65160   1
   1   3   1 1.32091 0.56046   1
   2  -3   1 160.917  13.809   1
  -2  -3  -1 159.141  14.554   3
  -2  -3  -1 154.017  14.429   6
   2   3   1 133.159  14.198   1
  -3  -3  -1 69.2584  6.6623   6
  -3  -3  -1 62.9657  6.7426   3
   3  -3   1 58.3151  6.0713   2
  -3  -3  -1 68.8749  6.4684   3
   3  -3   1 54.3894  6.0131   1
  -3   3  -1 52.3555  6.2652   3
   3   3   1 55.3102  6.0402   1
   3   3   1 71.5192  6.0460   2
  -3   3  -1 71.2346  6.1272   3
   4  -3   1 285.624  25.049   2
  -4  -3  -1 275.164  25.847   6
  -4  -3  -1 270.466  25.709   3
  -4  -3  -1 257.355  26.030   3
   4  -3   1 265.465  25.088   1
   4   3   1 276.047  25.814   3
   4   3   1 278.252  25.028   2
  -4   3  -1 297.567  25.770   3
  -4   3  -1 298.099  25.607   3
   4   3   1 272.527  25.103   1
  -5  -3  -1 10.2435  4.1218   3
  -5  -3  -1 24.9126  3.8736   6
  -5  -3  -1 18.0832  3.2608   3
   5  -3   1 16.3610  3.0679   1
   5  -3   1 16.6607  2.9727   2
  -5   3  -1 13.3904  3.5109   3
   5   3   1 15.7220  2.8852   2
   5   3   1 10.5216  2.7968   1
  -5   3  -1 16.9476  3.0001   3
   5   3   1 18.5915  3.6345   3
  -6  -3  -1 -0.9448  2.8874   6
   6  -3   1 3.57057 2.50864   1
   6  -3   1 6.83535 2.53058   2
  -6  -3  -1 1.07775 2.73986   3
  -6  -3  -1 6.15825 3.87056   3
   6   3   1 3.76523 2.42668   1
   6   3   1 1.56665 2.36917   2
  -6   3  -1 4.40712 3.11347   3
   6   3   1 1.78157 3.16901   3
  -6   3  -1 4.16413 2.53553   3
  -7  -3  -1 1.89371 3.79405   3
   7  -3   1 11.8586  2.9193   1
  -7  -3  -1 6.66502 2.87628   6
  -7  -3  -1 7.16320 3.04736   3
   7  -3   1 10.8058  2.8118   2
  -7   3  -1 8.47653 2.89619   3
   7   3   1 14.9928  2.8534   2
   7   3   1 18.7122  3.1458   1
  -8  -3  -1 1.15342 3.72132   3
   8  -3   1 6.10988 3.01457   1
  -8  -3  -1 6.57868 2.74461   6
   8  -3   1 5.89331 2.69088   2
  -8  -3  -1 0.50655 3.26630   3
  -8   3  -1 1.61211 3.06728   3
   8   3   1 -1.6953  3.7932   3
  -8   3  -1 2.49792 2.87845   3
   8   3   1 4.45718 2.88961   1
   8   3   1 8.48311 2.75275   2
  -9  -3  -1 14.3376  4.8880   3
   9  -3   1 18.6144  4.1069   1
   9  -3   1 21.7228  3.7363   2
   9   3   1 14.7934  3.8436   1
  -9   3  -1 11.0980  3.9011   3
  -9   3  -1 11.6657  3.9375   3
   9   3   1 14.9838  3.5811   2
 -10  -3  -1 22.2511  5.1152   3
  10  -3   1 12.0496  4.2744   1
  10  -3   1 10.6897  3.5388   2
  10   3   1 17.3302  3.7385   2
  10   3   1 16.9684  4.5266   1
 -10   3  -1 11.4094  4.0442   3
 -11  -3  -1 14.6199  4.9409   3
  11  -3   1 13.2908  4.9647   1
  11   3   1 11.8177  4.9593   1
  11   3   1 11.8131  3.8737   2
 -11   3  -1 23.2481  4.4912   3
  12  -3   1 100.178  11.742   1
 -12  -3  -1 101.069  10.804   3
  12   3   1 87.0262 11.4080   1
 -12   3  -1 83.2123 10.0663   3
 -13  -3  -1 41.1707  6.9003   3
  13  -3   1 43.6596  8.3989   1
 -13   3  -1 44.3172  6.3243   3
  13   3   1 52.1328  8.8182   1
 -14  -4   1 6.47913 5.62546   3
 -14   4   1 6.84439 4.82580   3
 -13  -4   1 15.8509  4.3117   6
 -13  -4   1 15.8975  5.8635   3
 -13   4   1 10.2876  5.0447   3
 -12  -4   1 1.05596 4.86608   3
  12  -4  -1 8.57997 4.45711   2
 -12  -4   1 2.46432 4.08937   6
  12  -4  -1 3.05217 5.24513   1
  12   4  -1 8.04471 4.14109   2
 -12   4   1 -1.8527  4.2179   3
  11  -4  -1 21.0512  5.9667   1
 -11  -4   1 50.0148  7.6965   3
  11  -4  -1 23.1686  5.3714   2
 -11  -4   1 41.9269  6.4971   6
  11   4  -1 28.0227  6.4127   1
  11   4  -1 35.8468  5.6197   2
 -11   4   1 25.4961  4.4596   6
 -11   4   1 24.5283  5.9670   3
  10  -4  -1 -4.5560  3.4224   2
 -10  -4   1 -4.4903  4.4755   6
 -10  -4   1 7.54792 5.12155   3
  10  -4  -1 -1.0711  3.7496   1
 -10   4   1 -2.0543  3.2043   6
 -10   4   1 -1.7419  4.0987   3
  10   4  -1 -3.4588  3.2205   2
  10   4  -1 -5.3473  3.6602   1
   9  -4  -1 32.7045  5.3617   1
   9  -4  -1 33.3580  5.3373   2
  -9  -4   1 25.7088  5.7809   6
  -9  -4   1 21.0947  6.0305   3
   9   4  -1 15.2193  5.6986   3
  -9   4   1 37.7880  5.8624   3
  -9   4   1 24.5414  4.5637   6
   9   4  -1 22.4275  4.8260   1
   9   4  -1 22.7576  4.6052   2
   8  -4  -1 -1.7842  2.8674   1
  -8  -4   1 3.97140 4.18585   3
   8  -4  -1 1.71587 3.98670   3
   8  -4  -1 -3.4212  2.8795   2
  -8  -4   1 -1.0181  4.0305   6
   8   4  -1 4.25393 2.92406   2
  -8   4   1 0.38204 2.98136   6
  -8   4   1 -3.3934  3.4221   3
   8   4  -1 5.58876 3.98312   3
   8   4  -1 4.83873 3.08727   1
   7  -4  -1 36.0200  5.4415   2
  -7  -4   1 42.8920  6.1856   6
   7  -4  -1 35.0289  5.7461   3
  -7  -4   1 33.6978  6.1709   3
   7  -4  -1 42.2024  5.5749   1
  -7   4   1 34.8623  5.8894   3
  -7   4   1 39.3410  5.4283   3
   7   4  -1 44.3200  5.4856   1
   7   4  -1 34.9748  5.2574   2
  -7   4   1 38.2323  5.3718   6
   7   4  -1 32.3656  5.6382   3
  -6  -4   1 13.6469  4.9548   3
   6  -4  -1 9.55383 4.01469   3
  -6  -4   1 8.24026 4.55707   6
   6  -4  -1 13.3118  3.9156   2
   6  -4  -1 10.1888  3.4100   1
   6   4  -1 14.0259  3.5758   2
   6   4  -1 5.67499 2.96497   1
   6   4  -1 5.68689 3.74766   3
  -6   4   1 11.5026  3.5621   3
  -6   4   1 10.2308  3.7072   6
  -6   4   1 15.6152  4.4038   3
   5  -4  -1 17.5884  3.9071   3
   5  -4  -1 23.5106  3.6001   1
  -5  -4   1 11.5724  4.3998   6
   5  -4  -1 19.7756  3.9910   2
  -5  -4   1 14.6181  4.6211   3
   5   4  -1 16.5837  3.2493   1
   5   4  -1 9.39765 3.66488   3
  -5   4   1 7.69274 4.01683   3
   5   4  -1 21.0941  3.7554   2
  -5   4   1 13.6324  3.8409   6
  -4  -4   1 154.102  16.601   3
   4  -4  -1 204.627  16.344   2
   4  -4  -1 188.513  15.932   1
   4  -4  -1 181.269  16.283   3
   4   4  -1 176.099  15.798   1
   4   4  -1 142.604  16.768   6
   4   4  -1 180.344  16.298   3
  -4   4   1 145.781  16.305   6
  -4   4   1 154.572  16.487   3
   4   4  -1 179.501  16.016   2
  -3  -4   1 93.6940 10.5635   3
   3  -4  -1 94.3565 10.2225   2
   3  -4  -1 90.3773  9.8056   1
   3  -4  -1 123.029  10.301   3
  -3   4   1 87.6974 10.3986   3
  -3   4   1 85.8973 10.3257   6
   3   4  -1 119.590  10.101   2
   3   4  -1 122.098   9.866   1
   3   4  -1 112.979  10.165   3
  -2  -4   1 2222.42  215.10   3
   2  -4  -1 2379.80  210.03   2
   2  -4  -1 2356.20  210.22   1
   2  -4  -1 2610.26  215.02   3
   2   4  -1 2145.47  209.92   2
   2   4  -1 2370.02  215.68   6
  -2   4   1 2261.83  215.06   3
   2   4  -1 2531.25  214.97   3
   2   4  -1 2453.77  210.19   1
   1  -4  -1 -4.6386  0.7927   1
   1  -4  -1 -4.2601  0.9239   3
  -1  -4   1 -3.6791  0.9406   1
   1   4  -1 -5.1008  0.3728   4
   1   4  -1 -3.0896  0.9645   3
   1   4  -1 -4.9345  0.8340   2
  -1   4   1 -4.3283  1.0429   3
   0  -4  -1 153.943  13.373   6
   0  -4  -1 153.306  13.043   1
   0  -4   1 152.809  13.144   5
   0   4   1 140.351  13.023   1
   0   4  -1 127.886  12.958   2
  -1  -4  -1 -1.7753  0.9974   4
  -1  -4  -1 -1.3150  1.1656   6
  -1  -4  -1 -0.0768  0.4163   3
  -1  -4  -1 -0.0405  0.4836   1
   1   4   1 -0.2756  0.8083   3
   1   4   1 1.30531 0.66884   1
   2  -4   1 827.020  76.570   2
   2  -4   1 955.997  76.657   1
  -2  -4  -1 897.068  78.489   3
  -2  -4  -1 838.027  78.657   3
  -2  -4  -1 795.784  78.778   6
  -3  -4  -1 0.81277 1.43824   3
   3  -4   1 -0.1063  0.9878   1
   3  -4   1 0.49669 1.26624   2
  -3  -4  -1 -1.1910  1.9656   3
  -3  -4  -1 -1.1299  1.8082   6
  -3   4  -1 -1.7756  1.0620   3
   3   4   1 0.06499 1.09184   2
   3   4   1 -0.1288  1.0155   1
   3   4   1 -0.1542  1.4751   3
  -3   4  -1 1.96903 1.01163   3
   4  -4   1 129.676  11.182   2
  -4  -4  -1 101.529  11.910   3
   4  -4   1 129.865  11.195   1
  -4  -4  -1 97.5473 11.7278   6
  -4  -4  -1 123.093  11.560   3
  -4   4  -1 100.235  11.402   3
  -4   4  -1 121.964  11.269   3
   4   4   1 123.815  11.625   3
   4   4   1 132.531  11.163   1
   4   4   1 119.975  11.040   2
   5  -4   1 61.5734  6.4737   2
  -5  -4  -1 53.0609  6.9307   3
  -5  -4  -1 37.6584  7.0977   3
   5  -4   1 54.5585  6.5545   1
  -5  -4  -1 45.2776  6.5269   6
   5   4   1 54.7735  6.2255   2
  -5   4  -1 66.0140  6.8898   3
   5   4   1 70.0700  6.4809   1
   5   4   1 62.9641  7.1606   3
  -5   4  -1 60.7517  6.5275   3
  -6  -4  -1 3.34860 3.71862   3
  -6  -4  -1 2.23673 2.83890   3
   6  -4   1 8.24802 2.66342   1
  -6  -4  -1 3.88698 3.25637   6
   6  -4   1 -0.3852  2.3450   2
   6   4   1 4.04547 2.39889   2
  -6   4  -1 6.44973 2.54698   3
   6   4   1 3.30137 2.55578   1
  -6   4  -1 8.03854 3.04720   3
   6   4   1 6.34426 3.25826   3
  -7  -4  -1 311.549  30.621   3
   7  -4   1 323.865  29.743   2
  -7  -4  -1 332.992  30.564   6
   7  -4   1 331.650  30.020   1
  -7  -4  -1 355.314  31.233   3
   7   4   1 329.618  29.965   1
   7   4   1 301.450  30.756   3
  -7   4  -1 338.628  30.593   3
   7   4   1 328.628  29.726   2
  -7   4  -1 325.009  30.422   3
   8  -4   1 0.74028 2.45936   2
  -8  -4  -1 0.87726 3.82490   3
  -8  -4  -1 6.31156 2.84593   6
  -8  -4  -1 -2.0688  3.2005   3
   8  -4   1 0.13240 2.72448   1
   8   4   1 -0.5817  3.7038   3
  -8   4  -1 -0.9099  2.7590   3
   8   4   1 -2.0982  2.5102   1
  -8   4  -1 -3.7858  2.6332   3
   8   4   1 -1.2708  2.3260   2
   9  -4   1 77.8288  8.7739   2
  -9  -4  -1 87.7628 10.0895   3
   9  -4   1 79.1979  9.3553   1
   9   4   1 72.2512  8.6531   2
  -9   4  -1 82.0154  9.2427   3
  -9   4  -1 89.4864  9.5054   3
   9   4   1 90.6816  9.3842   1
  10  -4   1 -0.7186  3.0853   2
 -10  -4  -1 -2.0595  4.1526   3
  10  -4   1 6.60286 4.02330   1
  10   4   1 -1.6774  2.9386   2
 -10   4  -1 5.46736 3.47830   3
  10   4   1 2.79514 3.68673   1
  11  -4   1 63.1006  8.6059   1
 -11  -4  -1 52.6035  8.0523   3
 -11   4  -1 56.7418  7.4209   3
  11   4   1 62.6688  8.5519   1
  11   4   1 58.3045  7.3616   2
 -12  -4  -1 38.6153  6.7220   3
  12  -4   1 47.3591  7.7909   1
 -12   4  -1 37.3449  5.8012   3
  12   4   1 41.4886  7.2892   1
 -13  -4  -1 17.3436  5.0703   3
  13  -4   1 10.4937  5.9982   1
 -13   4  -1 9.92194 3.79707   3
  13   4   1 19.1786  6.3658   1
 -14  -5   1 7.08768 5.88744   3
 -14   5   1 11.5921  4.9172   3
 -13  -5   1 34.4867  6.8702   3
 -13  -5   1 23.8023  5.0576   6
  13   5  -1 20.5670  5.5118   2
 -13   5   1 22.2804  5.7298   3
 -12  -5   1 9.78190 4.65066   6
 -12  -5   1 3.43413 5.29131   3
  12  -5  -1 12.0880  5.4537   1
 -12   5   1 6.96076 4.65710   3
  12   5  -1 4.72254 4.25540   2
  11  -5  -1 19.7375  5.7998   1
 -11  -5   1 20.9390  6.5460   3
 -11  -5   1 24.1313  5.8664   6
  11  -5  -1 34.4327  5.7308   2
  11   5  -1 27.2095  6.2380   1
  11   5  -1 21.3776  5.0885   2
 -11   5   1 32.5354  6.1474   3
  10  -5  -1 1.24115 4.07421   1
  10  -5  -1 2.33860 3.83804   2
 -10  -5   1 -4.5361  4.6510   6
 -10  -5   1 1.28111 5.05917   3
  10   5  -1 10.3790  3.8490   2
  10   5  -1 4.61789 4.08055   1
 -10   5   1 3.49446 3.17299   6
 -10   5   1 1.98967 4.36627   3
  -9  -5   1 3.04651 4.80611   6
  -9  -5   1 -5.3462  4.4882   3
   9  -5  -1 0.77591 3.29035   1
   9  -5  -1 -0.5001  3.4624   2
  -9   5   1 -0.4102  3.0306   6
   9   5  -1 -0.7131  3.3151   1
   9   5  -1 3.94191 4.71759   3
   9   5  -1 -1.1447  3.0582   2
  -9   5   1 -3.1688  3.6154   3
   8  -5  -1 -3.1689  3.8502   3
  -8  -5   1 7.50943 4.39114   6
  -8  -5   1 -5.6376  3.4934   3
   8  -5  -1 3.41992 3.28769   2
   8  -5  -1 3.58515 2.98914   1
  -8   5   1 -3.8243  3.3307   3
   8   5  -1 1.97006 2.89410   2
   8   5  -1 1.59810 3.72430   3
  -8   5   1 -2.9646  2.8261   6
   8   5  -1 2.41218 3.04498   1
  -7  -5   1 11.1157  4.4832   6
   7  -5  -1 6.89417 3.34594   2
  -7  -5   1 3.29334 4.04385   3
   7  -5  -1 2.14880 3.64381   3
   7  -5  -1 2.69541 2.98239   1
  -7   5   1 12.4232  3.3556   6
   7   5  -1 5.60753 3.14062   2
  -7   5   1 6.37049 3.68835   3
  -7   5   1 9.83731 3.47008   3
   7   5  -1 2.71789 5.37829   6
   7   5  -1 9.96373 3.14710   1
   7   5  -1 0.50241 3.53725   3
   6  -5  -1 100.035  11.667   3
  -6  -5   1 132.556  12.486   3
   6  -5  -1 113.549  11.703   2
  -6  -5   1 141.294  12.538   6
   6  -5  -1 110.131  11.214   1
  -6   5   1 106.797  11.547   3
   6   5  -1 103.969  11.289   2
  -6   5   1 105.800  12.068   3
   6   5  -1 133.344  13.397   6
   6   5  -1 111.204  11.713   3
   6   5  -1 97.0177 11.0826   1
  -6   5   1 98.5461 11.3726   6
   5  -5  -1 72.5112  8.6217   1
   5  -5  -1 90.1943  9.2145   3
   5  -5  -1 99.4762  9.5377   2
  -5  -5   1 82.3069  9.5602   3
  -5  -5   1 82.2129  9.8934   6
  -5   5   1 66.0532  8.4787   3
  -5   5   1 84.1974  9.0604   6
   5   5  -1 76.5017 10.3186   6
   5   5  -1 91.3067  9.0485   2
   5   5  -1 76.6573  8.5950   1
   5   5  -1 76.1404  9.0380   3
  -5   5   1 98.4637  9.7986   3
   4  -5  -1 86.7295  9.4422   2
   4  -5  -1 87.4990  9.0393   1
  -4  -5   1 92.7784  9.7533   3
   4  -5  -1 111.960   9.509   3
  -4   5   1 82.4838  9.3661   6
   4   5  -1 91.5985  8.9330   1
  -4   5   1 85.0125  9.6020   3
   4   5  -1 80.6306  9.8292   6
   4   5  -1 105.078   9.389   3
   4   5  -1 95.8686  9.2510   2
  -3  -5   1 523.236  50.979   3
   3  -5  -1 579.917  49.645   1
   3  -5  -1 515.688  49.705   2
   3   5  -1 603.784  49.626   1
  -3   5   1 582.219  50.901   6
   3   5  -1 478.820  49.562   2
   3   5  -1 533.848  51.048   6
  -3   5   1 622.285  50.958   3
  -2  -5   1 -1.7069  1.8787   1
  -2  -5   1 -3.6746  2.2015   3
   2  -5  -1 4.31871 2.01758   3
   2  -5  -1 1.80947 1.55464   1
   2   5  -1 -0.5377  1.5396   2
   2   5  -1 3.85014 1.40587   1
  -2   5   1 -0.7349  1.9810   3
   2   5  -1 -0.5392  2.1549   6
   1  -5  -1 15.8087  1.9052   1
  -1  -5   1 11.2988  1.8978   1
   1  -5  -1 23.7242  2.5454   3
  -1   5   1 11.5924  1.9865   3
   1   5  -1 15.4103  1.9290   3
   0  -5  -1 1.33038 0.72231   1
   0  -5   1 1.20881 0.42430   1
   0  -5   1 -0.1545  0.2938   1
   0  -5   1 -0.8201  0.7167   5
   0   5   1 1.83822 0.59872   1
   0   5  -1 0.07786 0.39933   5
   0   5  -1 -0.3769  0.5462   2
   0   5   1 -0.2081  0.5347   3
  -1  -5  -1 -2.8297  1.2084   4
  -1  -5  -1 -0.4148  1.0363   1
   1   5   1 1.61934 0.81306   1
   1   5   1 1.06503 1.16400   3
   2  -5   1 376.252  37.689   1
  -2  -5  -1 392.328  38.898   6
  -2  -5  -1 481.374  37.779   4
  -2  -5  -1 449.955  38.912   3
   3  -5   1 42.1460  5.3249   2
  -3  -5  -1 40.2218  5.3482   3
  -3  -5  -1 38.2988  5.7705   3
   3  -5   1 40.6677  5.0495   1
  -3  -5  -1 45.0030  5.8446   6
   3   5   1 60.7362  5.5832   3
  -3   5  -1 56.1358  5.0517   3
   3   5   1 53.3446  5.1438   1
   3   5   1 63.0593  5.1611   2
  -3   5  -1 58.6970  5.0621   3
  -4  -5  -1 325.321  26.966   6
  -4  -5  -1 288.160  26.709   3
   4  -5   1 272.904  25.976   2
  -4  -5  -1 326.026  27.129   3
   4  -5   1 259.350  25.964   1
   4   5   1 300.018  26.740   3
  -4   5  -1 286.963  26.422   3
  -4   5  -1 276.647  26.480   3
   4   5   1 296.775  25.933   2
   4   5   1 261.796  25.979   1
   5  -5   1 64.2505  6.9922   2
   5  -5   1 53.3115  6.9833   1
  -5  -5  -1 55.3358  7.7515   3
  -5  -5  -1 56.3988  7.3446   6
  -5  -5  -1 63.2028  7.5367   3
  -5   5  -1 70.8980  6.9034   3
  -5   5  -1 71.6815  7.2377   3
   5   5   1 69.5968  6.7213   2
   5   5   1 60.8284  6.8172   1
   5   5   1 54.5084  7.0495   3
   6  -5   1 77.6221  8.1647   2
  -6  -5  -1 74.7597  9.2132   3
   6  -5   1 81.3967  8.3780   1
  -6  -5  -1 83.9741  8.7703   6
  -6  -5  -1 79.6130  8.8283   3
  -6   5  -1 79.6678  8.3828   3
   6   5   1 61.6797  8.0607   1
   6   5   1 85.0326  8.0060   2
  -6   5  -1 65.0640  8.1768   3
   6   5   1 90.4076  9.0395   3
  -7  -5  -1 27.5409  4.6359   6
   7  -5   1 42.9182  4.7799   2
  -7  -5  -1 30.2980  4.7927   3
  -7  -5  -1 35.2056  5.6904   3
   7  -5   1 33.5112  4.6669   1
   7   5   1 28.3495  5.1338   3
  -7   5  -1 32.9310  4.3221   3
  -7   5  -1 31.3725  4.5932   3
   7   5   1 29.2529  4.2148   2
   7   5   1 30.7726  4.4982   1
   8  -5   1 3.14419 2.60906   2
  -8  -5  -1 0.56167 3.99345   3
   8  -5   1 7.01770 2.92981   1
  -8  -5  -1 1.09604 2.90691   6
  -8  -5  -1 4.26808 3.47773   3
   8   5   1 7.34684 2.66338   2
  -8   5  -1 -0.1659  2.7995   3
   8   5   1 3.56141 2.82607   1
  -8   5  -1 10.2838  3.0600   3
   8   5   1 11.3612  4.2004   3
   9  -5   1 9.20676 3.23507   2
  -9  -5  -1 4.60583 3.15203   6
  -9  -5  -1 10.2377  4.6759   3
   9  -5   1 17.2122  4.0023   1
   9   5   1 4.39699 2.91519   2
  -9   5  -1 9.28593 3.58925   3
  -9   5  -1 9.88727 3.50997   3
   9   5   1 6.36755 3.55436   1
  10  -5   1 -0.0151  3.8040   1
 -10  -5  -1 1.15569 4.37881   3
  10  -5   1 0.14234 3.08983   2
  10   5   1 6.06511 3.22918   2
 -10   5  -1 0.71984 3.16001   3
  10   5   1 3.61992 3.85176   1
 -11  -5  -1 77.5518  8.9943   3
  11  -5   1 65.7884  9.0387   1
  11   5   1 58.9707  7.7285   2
  11   5   1 76.3135  9.1384   1
 -11   5  -1 54.2257  7.6596   3
  12  -5   1 29.7926  7.1266   1
 -12  -5  -1 40.2583  7.0207   3
  12   5   1 47.3503  7.7317   1
 -12   5  -1 48.1883  6.0124   3
  13  -5   1 33.1908  7.3560   1
 -13  -5  -1 28.9493  6.0926   3
  13   5   1 36.3409  7.7356   1
 -14  -6   1 5.12944 5.85279   3
 -14   6   1 -3.5845  4.0431   3
 -13  -6   1 12.3236  5.5982   3
 -13  -6   1 1.70995 4.12502   6
 -13   6   1 4.43585 4.25915   3
  13   6  -1 2.72839 4.30883   2
 -12  -6   1 21.6928  6.3494   3
  12  -6  -1 21.6384  6.0340   1
 -12  -6   1 13.5534  5.3116   6
  12   6  -1 19.4600  5.0280   2
 -12   6   1 12.0193  4.9613   3
  11  -6  -1 -2.2081  3.8723   2
 -11  -6   1 -1.1387  4.7788   6
 -11  -6   1 -1.0942  5.1855   3
  11  -6  -1 -0.8838  4.1514   1
  11   6  -1 3.52591 3.79443   2
 -11   6   1 0.22006 4.06256   3
  11   6  -1 -2.7097  4.4040   1
 -10  -6   1 17.3068  5.7646   6
  10  -6  -1 18.1029  5.1563   1
  10  -6  -1 16.9110  4.7752   2
 -10  -6   1 21.0349  6.2991   3
  10   6  -1 17.3613  4.9386   1
 -10   6   1 12.2646  4.7065   3
  10   6  -1 13.6607  4.1448   2
   9  -6  -1 -5.7253  3.2643   2
   9  -6  -1 -3.7430  3.2369   1
  -9  -6   1 -0.7347  4.7142   6
  -9  -6   1 5.88469 5.10329   3
   9   6  -1 4.83634 3.35600   2
  -9   6   1 4.65178 3.94504   3
  -9   6   1 0.98683 2.92559   6
   9   6  -1 -1.7335  3.3971   1
   9   6  -1 0.83462 4.83692   3
  -8  -6   1 28.8141  5.8915   6
  -8  -6   1 25.8678  5.7395   3
   8  -6  -1 20.6591  5.3073   3
   8  -6  -1 28.0958  4.8416   1
   8  -6  -1 19.8092  4.7122   2
  -8   6   1 26.3339  4.3215   6
   8   6  -1 23.3585  4.4290   2
  -8   6   1 30.4629  5.2560   3
  -8   6   1 26.7009  4.7762   3
   8   6  -1 24.2675  5.2603   3
   8   6  -1 30.1121  4.8136   1
   7  -6  -1 3.75125 3.68680   3
  -7  -6   1 3.94454 4.11248   3
   7  -6  -1 2.60094 3.04471   2
  -7  -6   1 -0.8051  4.0799   6
   7  -6  -1 -1.1195  2.6455   1
   7   6  -1 -3.9288  2.3239   1
   7   6  -1 9.30549 5.28933   6
   7   6  -1 -1.2230  3.3763   3
   7   6  -1 1.10127 2.70768   2
  -7   6   1 1.27112 3.42624   3
  -7   6   1 -3.7907  2.6458   6
  -7   6   1 -5.5627  2.9417   3
   6  -6  -1 276.334  23.371   2
  -6  -6   1 240.614  24.110   3
   6  -6  -1 242.227  22.912   1
  -6  -6   1 233.753  24.016   6
   6  -6  -1 249.392  23.644   3
  -6   6   1 259.469  23.820   3
  -6   6   1 224.617  23.368   3
   6   6  -1 242.041  23.536   3
   6   6  -1 235.754  24.319   6
   6   6  -1 263.242  23.048   2
  -6   6   1 232.662  23.345   6
   6   6  -1 264.764  22.972   1
  -5  -6   1 43.2849  7.3243   6
   5  -6  -1 55.6742  6.9804   3
   5  -6  -1 76.4361  7.7630   2
   5  -6  -1 51.1526  6.5694   1
  -5  -6   1 59.9890  7.6553   3
   5   6  -1 59.8046  6.9281   3
   5   6  -1 48.4833  7.5766   6
   5   6  -1 61.0928  7.0043   2
  -5   6   1 58.1756  7.1810   3
   5   6  -1 59.5420  6.7198   1
  -5   6   1 56.0982  7.0162   3
  -5   6   1 51.2037  7.0455   6
   4  -6  -1 9.07654 2.85430   3
   4  -6  -1 16.1509  3.1568   2
   4  -6  -1 14.0889  2.5421   1
  -4  -6   1 11.4287  3.4378   3
   4   6  -1 13.4843  2.5796   2
   4   6  -1 7.21147 3.28310   6
  -4   6   1 12.1702  3.0415   3
   4   6  -1 12.8048  2.6891   3
   4   6  -1 19.2291  2.5653   1
  -4   6   1 6.16839 2.53547   6
  -3  -6   1 978.878  94.699   3
   3  -6  -1 1018.25   92.39   1
   3  -6  -1 1102.64   92.45   2
   3   6  -1 1019.14   92.31   2
  -3   6   1 992.257  94.714   6
   3   6  -1 1195.62   92.42   1
   3   6  -1 1128.90   94.49   3
   3   6  -1 931.765  94.843   6
  -3   6   1 975.532  94.549   3
  -2  -6   1 1.87733 1.87474   1
   2  -6  -1 0.68258 1.49903   1
   2  -6  -1 1.55836 1.98661   3
   2   6  -1 1.53075 1.60006   2
   2   6  -1 2.44598 1.32348   1
  -2   6   1 3.29203 1.96774   3
  -2   6   1 1.44527 1.80349   6
   2   6  -1 0.84258 1.71449   3
   1  -6  -1 3094.56  281.81   3
   1  -6  -1 3121.04  275.56   1
  -1  -6   1 3261.68  275.58   1
   1   6  -1 2994.53  281.73   3
  -1   6   1 3098.43  281.81   3
   1   6  -1 3085.47  275.14   2
   0  -6   1 -1.1242  0.9556   5
   0  -6   1 0.02342 0.62634   1
   0  -6   1 0.83254 0.48940   1
   0  -6  -1 -1.2844  0.9094   1
   0   6   1 0.96440 0.96624   3
   0   6   1 0.36029 0.72228   1
   0   6  -1 -0.9720  0.7611   5
   1  -6   1 78.6129  6.3047   1
  -1  -6  -1 59.3390  6.6789   4
   1  -6   1 61.6235  6.3677   1
  -1  -6  -1 54.8960  6.7290   1
   1   6   1 76.2776  6.5273   1
   1   6   1 83.0242  6.9048   3
   2  -6   1 48.3155  4.9391   1
  -2  -6  -1 36.8933  5.3967   1
  -2  -6  -1 50.9508  5.8114   6
  -2  -6  -1 65.1443  5.1682   4
   3  -6   1 69.4738  7.0111   2
  -3  -6  -1 74.1460  7.6268   3
  -3  -6  -1 68.3350  7.5217   6
   3  -6   1 70.2996  6.8370   1
  -3   6  -1 67.5783  6.7001   3
   3   6   1 81.6313  7.2567   3
   4  -6   1 214.549  18.393   2
  -4  -6  -1 185.474  18.819   3
  -4  -6  -1 195.568  19.227   3
   4  -6   1 192.309  18.309   1
  -4  -6  -1 178.379  19.067   6
  -4   6  -1 185.842  18.558   3
   4   6   1 221.119  18.301   2
  -4   6  -1 198.474  18.525   3
   4   6   1 203.601  18.914   3
   4   6   1 229.821  18.382   1
  -5  -6  -1 11.7341  3.3317   3
  -5  -6  -1 10.2649  3.9198   6
   5  -6   1 18.5174  3.2181   2
  -5  -6  -1 15.1881  4.3648   3
   5  -6   1 10.3388  2.9770   1
   5   6   1 14.7706  2.8475   2
  -5   6  -1 13.9169  2.7220   3
   5   6   1 16.1091  2.8279   1
  -5   6  -1 10.8210  2.9046   3
   5   6   1 10.5642  3.4167   3
   6  -6   1 352.946  32.443   1
   6  -6   1 357.536  32.303   2
  -6  -6  -1 341.249  33.230   3
  -6  -6  -1 395.660  33.787   3
  -6  -6  -1 376.258  33.418   6
   6   6   1 361.780  32.458   1
   6   6   1 338.457  33.297   3
   6   6   1 347.548  32.208   2
  -6   6  -1 348.866  32.881   3
  -6   6  -1 356.676  33.011   3
  -7  -6  -1 7.79328 3.38202   3
   7  -6   1 4.87330 2.63842   2
  -7  -6  -1 1.03828 3.59441   3
  -7  -6  -1 7.08598 3.32653   6
   7  -6   1 9.35220 2.81429   1
  -7   6  -1 4.45281 2.71070   3
   7   6   1 3.71978 2.37086   2
   7   6   1 7.60891 2.69912   1
   7   6   1 3.06781 3.49116   3
  -7   6  -1 6.99864 2.60165   3
  -8  -6  -1 115.970  11.841   6
   8  -6   1 117.244  11.832   1
   8  -6   1 112.987  11.463   2
  -8  -6  -1 117.723  12.785   3
  -8   6  -1 114.018  11.693   3
   8   6   1 98.3945 12.3440   3
   8   6   1 105.759  11.677   1
   8   6   1 123.445  11.386   2
  -8   6  -1 126.788  11.747   3
   9  -6   1 -0.3848  2.8991   2
   9  -6   1 -1.7390  3.2538   1
  -9  -6  -1 -1.5079  3.0950   6
  -9  -6  -1 7.71084 4.59159   3
  -9   6  -1 4.68101 3.07579   3
   9   6   1 5.82571 2.78052   2
  -9   6  -1 -0.0960  3.2443   3
   9   6   1 7.88148 3.47367   1
 -10  -6  -1 43.9549  7.8865   3
 -10  -6  -1 48.6988  6.2248   6
  10  -6   1 51.4255  7.5717   1
  10  -6   1 52.1050  6.4306   2
 -10   6  -1 46.8655  6.4452   3
  10   6   1 51.8175  6.4752   2
  10   6   1 54.4039  7.3924   1
 -11  -6  -1 13.7853  5.1136   3
  11  -6   1 21.4961  5.5228   1
 -11   6  -1 9.28630 3.75272   3
  11   6   1 12.7361  3.9720   2
  11   6   1 14.3595  5.0324   1
 -12  -6  -1 26.5474  5.9115   3
  12  -6   1 32.5750  6.7104   1
  12   6   1 34.1774  6.8803   1
 -12   6  -1 24.0508  4.6239   3
  13  -6   1 29.8508  7.2067   1
 -13  -6  -1 31.4481  6.1855   3
 -14  -7   1 -0.3644  5.5541   3
 -14   7   1 -2.0862  3.9926   3
 -13  -7   1 -3.4285  4.9147   3
 -13  -7   1 -0.7732  4.1729   6
  13  -7  -1 5.91055 5.67087   1
 -13   7   1 -5.4521  3.8546   3
  13   7  -1 -1.3059  4.1758   2
 -12  -7   1 2.45140 5.51510   3
 -12  -7   1 7.95506 5.12738   6
  12  -7  -1 8.12621 5.31347   1
 -12   7   1 3.14218 4.27402   3
  12   7  -1 9.75799 4.42929   2
  11  -7  -1 7.45623 4.34955   2
 -11  -7   1 11.0445  5.3844   6
  11  -7  -1 4.57228 4.59981   1
 -11  -7   1 2.10500 5.30755   3
  11   7  -1 10.1945  4.0190   2
 -11   7   1 11.0139  4.4834   3
  11   7  -1 2.50374 4.63607   1
 -10  -7   1 1.45422 5.28331   6
  10  -7  -1 4.78454 4.11842   2
  10  -7  -1 4.80202 4.21937   1
 -10  -7   1 9.55330 5.55324   3
  10   7  -1 -3.9008  3.7581   1
 -10   7   1 14.4499  4.5784   3
  10   7  -1 4.08331 3.67901   2
   9  -7  -1 26.2021  4.9670   2
  -9  -7   1 25.3065  5.9472   6
   9  -7  -1 29.1742  5.1374   1
  -9  -7   1 15.4088  5.6150   3
  -9   7   1 25.3842  4.9989   3
   9   7  -1 20.2521  4.7993   1
   9   7  -1 13.0958  5.4736   3
   9   7  -1 24.1741  4.6466   2
  -9   7   1 19.0348  3.8117   6
  -8  -7   1 6.28291 4.56703   3
   8  -7  -1 9.18182 4.47695   3
   8  -7  -1 10.1193  3.5468   1
  -8  -7   1 6.20813 4.85487   6
   8  -7  -1 6.43073 3.56228   2
  -8   7   1 4.25719 3.62989   3
   8   7  -1 9.05073 4.15636   3
  -8   7   1 -0.3939  3.4132   3
  -8   7   1 8.09446 3.02336   6
   8   7  -1 10.9874  3.4561   1
   8   7  -1 2.36013 3.00037   2
   7  -7  -1 2.92093 3.71924   3
  -7  -7   1 0.16619 3.80345   3
  -7  -7   1 -2.1616  4.2172   6
   7  -7  -1 1.11942 3.06889   2
   7  -7  -1 2.11199 2.75841   1
  -7   7   1 0.95007 2.67185   6
   7   7  -1 -0.2707  2.5135   2
   7   7  -1 4.12390 3.48690   3
  -7   7   1 -2.5783  3.2108   3
  -7   7   1 0.72785 3.11132   3
   7   7  -1 1.50876 2.60137   1
   7   7  -1 -4.0757  5.0471   6
   6  -7  -1 235.532  23.600   1
  -6  -7   1 250.260  24.746   6
   6  -7  -1 255.315  24.338   3
   6  -7  -1 285.593  24.029   2
  -6  -7   1 240.181  24.733   3
  -6   7   1 294.965  24.128   6
   6   7  -1 219.240  23.443   1
  -6   7   1 269.029  24.119   3
   6   7  -1 273.885  25.252   6
   6   7  -1 212.507  24.167   3
   6   7  -1 240.085  23.597   2
  -6   7   1 292.613  24.564   3
   5  -7  -1 43.0966  6.0996   2
   5  -7  -1 56.6981  6.5691   3
   5  -7  -1 49.6824  5.9332   1
  -5  -7   1 60.1552  7.1801   3
  -5   7   1 51.1228  6.4115   3
   5   7  -1 42.5138  5.7488   2
  -5   7   1 41.4029  5.8318   3
   5   7  -1 41.0933  6.0392   3
   5   7  -1 47.9561  7.2219   6
   5   7  -1 45.9378  5.7073   1
  -5   7   1 49.1406  6.1781   6
   4  -7  -1 6.78591 2.15055   1
   4  -7  -1 2.42097 2.50674   2
   4  -7  -1 11.2538  2.7408   3
  -4  -7   1 -1.9477  2.6978   3
  -4   7   1 8.99272 2.80761   3
  -4   7   1 6.85184 1.96695   3
   4   7  -1 7.57326 2.39647   3
   4   7  -1 2.87497 2.94350   6
   4   7  -1 1.53958 1.84485   1
   4   7  -1 4.13629 2.05802   2
  -3  -7   1 11.9073  2.7497   1
   3  -7  -1 12.6478  2.7261   2
   3   7  -1 10.2252  2.1796   2
  -3   7   1 14.7837  2.6985   3
   2  -7  -1 159.200  13.988   3
   2  -7  -1 165.243  13.592   1
  -2  -7   1 143.883  13.781   1
  -2   7   1 135.357  13.933   3
   2   7  -1 169.436  13.537   1
   2   7  -1 133.615  13.526   2
  -2   7   1 126.163  13.861   6
  -1  -7   1 0.31589 1.34251   1
   1  -7  -1 3.57376 1.34216   1
   1  -7  -1 -0.5581  1.6046   3
   1   7  -1 1.03221 1.25286   2
  -1   7   1 0.06051 1.09589   1
   1   7  -1 1.44033 1.39170   3
  -1   7   1 1.49669 1.41352   3
   0  -7   1 0.16031 1.23591   5
   0  -7   1 -0.6728  0.6319   1
   0  -7  -1 0.14979 1.18440   1
   0  -7   1 -1.2311  0.8193   1
   0   7   1 0.82032 0.92266   1
   0   7   1 2.95435 1.26413   3
   0   7  -1 -0.7656  1.1553   5
  -1  -7  -1 11.5890  2.0091   4
  -1  -7  -1 8.24271 2.12950   1
   1   7   1 18.1316  2.2463   3
   1   7   1 16.5064  1.8538   1
  -2  -7  -1 154.346  12.856   4
   2  -7   1 133.511  12.794   1
  -2  -7  -1 150.051  13.561   6
  -2  -7  -1 124.434  13.130   1
  -3  -7  -1 165.202  13.314   6
  -3  -7  -1 110.620  12.942   1
   3  -7   1 112.502  12.459   1
  -3  -7  -1 168.933  13.448   3
   3  -7   1 126.946  12.574   2
   3   7   1 144.232  12.573   1
   3   7   1 143.162  12.964   3
  -4  -7  -1 351.373  33.870   6
   4  -7   1 370.534  32.760   2
   4  -7   1 338.575  32.746   1
  -4  -7  -1 358.400  33.990   3
  -4   7  -1 392.011  33.320   3
   4   7   1 355.806  33.628   3
   4   7   1 339.468  32.745   1
   4   7   1 374.736  32.708   2
  -4   7  -1 384.480  33.283   3
  -5  -7  -1 9.76949 4.34263   3
   5  -7   1 11.9036  2.9638   2
  -5  -7  -1 8.60380 3.26800   3
   5  -7   1 9.96407 2.91591   1
  -5  -7  -1 6.99352 3.79692   6
  -5   7  -1 10.7626  2.4981   3
   5   7   1 11.1975  2.6797   1
  -5   7  -1 8.20520 2.58986   3
   5   7   1 9.73627 2.71238   2
   5   7   1 15.8079  3.5290   3
  -6  -7  -1 40.1834  6.2512   3
  -6  -7  -1 56.1435  7.3996   3
   6  -7   1 62.6857  6.5061   2
   6  -7   1 49.9383  6.3387   1
  -6  -7  -1 53.0113  6.8356   6
   6   7   1 58.3320  6.1223   2
   6   7   1 46.5796  6.5764   3
  -6   7  -1 53.5169  6.2857   3
   6   7   1 57.8132  6.3653   1
  -6   7  -1 55.6986  6.1866   3
   7  -7   1 67.3934  7.4562   2
   7  -7   1 60.8019  7.4227   1
  -7  -7  -1 72.2987  8.0285   6
  -7  -7  -1 52.8537  8.3145   3
  -7  -7  -1 50.1716  7.5303   3
   7   7   1 72.2516  7.5844   1
  -7   7  -1 63.3828  7.3795   3
   7   7   1 75.2413  8.4061   3
  -7   7  -1 77.3736  7.3553   3
   7   7   1 74.1856  7.2139   2
  -8  -7  -1 12.7010  4.1973   3
   8  -7   1 -1.5738  2.5663   2
   8  -7   1 1.09766 2.82841   1
  -8  -7  -1 3.48675 3.44655   6
  -8   7  -1 2.27292 2.60160   3
   8   7   1 2.50380 2.42507   2
   8   7   1 0.72644 2.62752   1
   8   7   1 5.65781 4.03157   3
  -8   7  -1 2.05655 2.66980   3
   9  -7   1 -1.5349  3.2812   1
  -9  -7  -1 0.53096 4.32094   3
   9  -7   1 -0.7305  3.0900   2
  -9  -7  -1 1.45208 3.27163   6
   9   7   1 0.15831 2.80928   2
   9   7   1 -2.4112  3.2556   1
  -9   7  -1 0.99264 3.16244   3
  -9   7  -1 -3.3372  2.8559   3
 -10  -7  -1 26.7038  4.8111   6
  10  -7   1 28.7706  5.8643   1
 -10  -7  -1 30.2044  6.4836   3
  10   7   1 34.9999  5.1125   2
  10   7   1 25.1177  5.5947   1
 -10   7  -1 41.7421  5.1546   3
  11  -7   1 11.7319  5.0374   1
 -11  -7  -1 11.0705  5.0041   3
  11   7   1 7.80869 4.73233   1
  11   7   1 6.91559 3.76942   2
 -11   7  -1 12.4816  3.6220   3
 -12  -7  -1 57.6227  7.8092   3
  12  -7   1 50.4460  7.9487   1
 -12   7  -1 37.4462  5.6539   3
  12   7   1 42.9879  8.0168   1
 -13  -7  -1 8.92219 4.87785   3
  13  -7   1 14.5160  6.0569   1
 -14  -8   1 8.74485 6.03003   3
 -14   8   1 -2.5871  3.9126   3
 -13  -8   1 2.23672 4.64527   6
  13  -8  -1 -5.4118  5.0362   1
 -13  -8   1 -7.2145  5.0842   3
 -13   8   1 -4.4446  3.6672   3
  13   8  -1 0.65807 4.12618   2
  12  -8  -1 1.60512 4.81567   1
 -12  -8   1 4.74804 5.51996   3
  12   8  -1 -3.4208  3.7206   2
 -12   8   1 -0.5975  3.8982   3
 -11  -8   1 71.4068  9.6972   3
  11  -8  -1 68.0981  8.2447   2
  11  -8  -1 57.6217  8.4773   1
  11   8  -1 49.4690  7.6232   2
  11   8  -1 66.2569  8.7438   1
 -11   8   1 45.5611  7.7972   3
  10  -8  -1 -3.7019  3.7069   1
 -10  -8   1 0.39806 5.28075   6
  10  -8  -1 -0.9626  3.9218   2
 -10  -8   1 4.71141 5.57996   3
  10   8  -1 6.63258 4.20787   1
 -10   8   1 -0.9512  3.8081   3
  10   8  -1 3.62313 3.56880   2
  -9  -8   1 190.791  18.165   3
  -9  -8   1 169.761  17.913   6
   9  -8  -1 186.548  17.062   1
   9  -8  -1 168.679  16.990   2
   9   8  -1 164.283  16.909   1
  -9   8   1 172.832  17.323   3
   9   8  -1 153.341  17.600   3
   9   8  -1 165.679  16.714   2
  -8  -8   1 1.21731 4.30042   3
  -8  -8   1 0.89951 4.67815   6
   8  -8  -1 3.24502 3.11085   1
   8  -8  -1 0.78829 3.29910   2
   8  -8  -1 0.17939 4.44871   3
  -8   8   1 3.42550 3.48139   3
   8   8  -1 -1.6491  2.7739   1
   8   8  -1 2.69658 2.80757   2
  -8   8   1 -1.2954  3.3737   3
   8   8  -1 2.03551 3.85171   3
  -8   8   1 -0.1421  2.5199   6
   7  -8  -1 13.3094  4.6440   3
   7  -8  -1 20.1220  3.7599   1
  -7  -8   1 17.3256  5.0886   6
   7  -8  -1 16.8423  3.9802   2
  -7  -8   1 15.0387  4.7590   3
   7   8  -1 13.6807  3.4961   1
   7   8  -1 17.5813  3.6869   2
   7   8  -1 10.6177  5.4794   6
  -7   8   1 11.3471  3.2214   6
  -7   8   1 21.6422  3.8819   3
   7   8  -1 7.42750 3.89497   3
  -7   8   1 14.7237  3.9527   3
   6  -8  -1 51.2810  5.9667   1
   6  -8  -1 47.6120  6.4545   3
  -6  -8   1 52.7880  7.1566   3
  -6  -8   1 57.3823  7.0727   6
   6  -8  -1 53.9749  6.3468   2
  -6   8   1 33.0990  5.4154   6
   6   8  -1 42.3814  5.7259   2
   6   8  -1 34.1501  6.8397   6
   6   8  -1 39.9693  6.0959   3
  -6   8   1 46.8730  5.7755   3
   6   8  -1 44.6729  5.7041   1
  -6   8   1 38.6660  6.0547   3
   5  -8  -1 8.75940 4.01961   3
  -5  -8   1 8.93649 4.54325   3
   5  -8  -1 9.58232 3.15365   1
   5  -8  -1 9.08408 3.78081   2
   5   8  -1 5.77598 3.09791   2
   5   8  -1 11.3751  3.6014   3
   5   8  -1 10.1832  4.6409   6
   5   8  -1 9.34145 3.05954   1
  -5   8   1 9.63626 3.19316   6
  -5   8   1 15.4607  3.9205   3
  -5   8   1 12.3320  3.6418   3
   4  -8  -1 4.79114 2.63980   3
   4  -8  -1 4.00852 2.15057   1
   4  -8  -1 7.18909 2.74632   2
  -4  -8   1 4.68694 3.17827   3
  -4   8   1 18.0586  2.6801   6
   4   8  -1 9.07451 2.12085   1
  -4   8   1 4.07323 2.54399   3
   4   8  -1 4.23218 3.33178   6
  -4   8   1 4.03178 2.43494   3
   4   8  -1 4.38132 2.19588   2
   4   8  -1 5.20311 2.40155   3
   3  -8  -1 8.98072 2.28041   3
   3  -8  -1 8.47589 1.88423   1
  -3  -8   1 11.3089  2.7543   3
  -3  -8   1 -1.4140  2.0170   1
   3   8  -1 7.73500 1.99588   3
  -3   8   1 2.33339 1.33573   3
  -3   8   1 3.26516 1.80892   6
  -3   8   1 7.92537 2.02676   3
   3   8  -1 10.8889  1.9311   2
   3   8  -1 9.43724 1.78129   1
   3   8  -1 4.98090 2.54208   6
  -2  -8   1 2140.21  181.16   1
   2  -8  -1 2156.01  185.14   3
   2  -8  -1 1852.64  180.95   1
   2   8  -1 2005.57  180.74   2
  -2   8   1 1933.64  185.08   3
   2   8  -1 2033.53  185.05   3
   2   8  -1 2161.06  180.96   1
   1  -8  -1 1.52830 1.80556   3
   1  -8  -1 0.49889 1.34882   1
  -1  -8   1 -0.0407  1.3614   1
  -1   8   1 0.98809 1.17932   1
   1   8  -1 -1.0172  1.2389   2
   1   8  -1 0.07089 1.43430   3
  -1   8   1 1.24741 1.46571   3
   0  -8   1 4.55325 1.14109   1
   0  -8   1 1.71519 0.85529   1
   0  -8  -1 3.67709 1.43942   1
   0  -8   1 5.80669 1.55289   5
   0   8   1 7.43401 1.59899   3
   0   8  -1 8.14021 1.57072   5
   0   8  -1 3.34474 1.05972   3
   0   8   1 2.15335 1.12030   1
   0   8  -1 5.63195 1.25842   3
   1  -8   1 9.07347 1.00127   1
   1  -8   1 1.44705 1.09503   1
  -1  -8  -1 0.67727 1.64994   1
   1   8   1 7.31496 1.35705   1
   1   8   1 4.56790 1.77909   3
   2  -8   1 173.832  17.220   1
  -2  -8  -1 164.172  17.976   6
  -2  -8  -1 188.972  17.601   1
  -2  -8  -1 183.999  17.227   4
   2  -8   1 195.179  17.179   1
   2   8   1 221.530  17.340   1
   2   8   1 209.263  17.847   3
   3  -8   1 35.9272  4.4453   1
  -3  -8  -1 42.0246  5.2711   1
  -3  -8  -1 36.8218  5.0195   6
  -3  -8  -1 42.7299  5.2424   3
   3   8   1 37.6863  4.8398   3
   3   8   1 55.1212  4.5456   1
  -4  -8  -1 103.998  11.065   3
   4  -8   1 121.447  10.443   2
   4  -8   1 111.187  10.260   1
  -4  -8  -1 96.9771 11.1002   6
  -4   8  -1 109.776  10.173   3
   4   8   1 126.837  10.297   1
  -4   8  -1 92.3951 10.0923   3
   4   8   1 97.6613 10.6607   3
   5  -8   1 59.7253  7.2329   2
   5  -8   1 56.7280  6.8760   1
  -5  -8  -1 49.9899  7.3164   6
  -5  -8  -1 51.2465  7.6035   3
  -5   8  -1 56.5344  6.5528   3
  -5   8  -1 69.6016  6.5543   3
   5   8   1 63.2599  6.7235   1
   5   8   1 63.1916  6.6933   2
   5   8   1 68.2239  7.6093   3
   6  -8   1 9.36894 2.85769   2
  -6  -8  -1 5.54105 3.73619   6
  -6  -8  -1 3.29216 4.08138   3
   6  -8   1 8.38498 2.81187   1
  -6  -8  -1 11.1699  3.4149   3
   6   8   1 9.99707 2.69850   1
  -6   8  -1 5.66124 2.48519   3
   6   8   1 0.41608 3.35377   3
  -6   8  -1 7.06307 2.33355   3
   6   8   1 11.1042  2.6513   2
  -7  -8  -1 934.466  88.912   3
  -7  -8  -1 1040.85   89.26   6
   7  -8   1 965.329  86.657   2
  -7  -8  -1 1062.59   89.52   3
   7  -8   1 1005.16   87.00   1
   7   8   1 885.103  88.923   3
  -7   8  -1 965.660  88.528   3
   7   8   1 961.698  86.971   1
   7   8   1 944.980  86.645   2
  -7   8  -1 967.641  88.581   3
   8  -8   1 -1.7262  2.6204   2
   8  -8   1 -6.0183  2.6913   1
  -8  -8  -1 2.70387 3.96664   3
  -8  -8  -1 3.26277 3.42666   6
  -8   8  -1 -1.3000  2.5560   3
   8   8   1 1.87860 3.91502   3
  -8   8  -1 0.05509 2.38515   3
   8   8   1 0.59521 2.69134   1
   8   8   1 -3.1858  2.2412   2
  -9  -8  -1 3.83154 3.60562   6
  -9  -8  -1 1.30702 4.50707   3
   9  -8   1 0.74640 3.22808   2
   9  -8   1 0.49195 3.51800   1
  -9   8  -1 4.88928 3.17811   3
  -9   8  -1 3.37289 2.94837   3
   9   8   1 5.56965 3.45846   1
   9   8   1 3.16827 2.80011   2
 -10  -8  -1 5.65160 5.02999   3
 -10  -8  -1 5.20290 3.61526   6
  10  -8   1 7.61577 4.19831   1
  10   8   1 7.78548 3.39367   2
  10   8   1 6.15270 4.07015   1
 -10   8  -1 6.76256 3.19819   3
 -10   8  -1 -0.2020  3.4583   3
 -11  -8  -1 17.1455  5.5180   3
  11  -8   1 9.72347 4.64881   1
  11   8   1 8.99967 4.65014   1
  11   8   1 13.2163  3.8828   2
 -11   8  -1 11.0792  3.4499   3
 -12  -8  -1 28.1239  6.1012   3
  12  -8   1 14.6108  5.6912   1
  12   8   1 16.0435  6.0172   1
 -13  -8  -1 -0.1015  4.6055   3
  13  -8   1 1.24218 5.48770   1
  13  -9  -1 11.9552  6.0595   1
 -13  -9   1 0.58157 5.66505   3
 -13   9   1 5.72704 4.18811   3
  13   9  -1 0.91337 4.28354   2
  12  -9  -1 8.51880 5.25123   1
 -12  -9   1 3.70587 5.51138   3
  12   9  -1 8.67430 4.28737   2
 -12   9   1 12.7286  4.3640   3
  11  -9  -1 16.5196  5.1636   2
 -11  -9   1 20.2340  6.3474   3
  11  -9  -1 20.6257  5.6687   1
  11   9  -1 26.3720  5.1302   2
 -11   9   1 16.9103  4.9821   3
  10  -9  -1 4.78923 4.25485   2
  10  -9  -1 5.64481 4.30597   1
 -10  -9   1 -0.3601  5.2206   3
  10   9  -1 4.97122 4.26587   1
  10   9  -1 1.64109 3.54564   2
 -10   9   1 7.57086 4.25694   3
   9  -9  -1 19.5669  4.7983   2
  -9  -9   1 20.4230  5.5925   3
  -9  -9   1 19.7004  6.1002   6
   9  -9  -1 26.2015  4.9302   1
  -9   9   1 24.1390  4.9031   3
   9   9  -1 20.4867  5.6271   3
   9   9  -1 14.7843  4.5965   1
   9   9  -1 18.7130  4.4346   2
  -8  -9   1 24.2084  5.9628   6
   8  -9  -1 25.5020  5.7224   3
   8  -9  -1 39.4883  5.3202   2
  -8  -9   1 25.3588  5.8986   3
   8   9  -1 27.0035  5.2224   3
   8   9  -1 25.3659  4.5521   1
  -8   9   1 15.0378  4.4274   3
   8   9  -1 25.5855  4.4247   2
  -8   9   1 18.6331  4.4943   3
  -7  -9   1 7.70542 4.30492   3
   7  -9  -1 2.16730 2.79860   1
   7  -9  -1 -1.9717  3.8735   3
   7  -9  -1 4.15928 3.23018   2
  -7  -9   1 1.78151 4.37555   6
  -7   9   1 -2.4991  3.1264   3
   7   9  -1 5.62164 3.55640   3
   7   9  -1 3.57054 2.64922   2
  -7   9   1 0.19547 2.97975   3
  -7   9   1 0.97448 2.51963   6
   7   9  -1 -3.2844  4.6466   6
   7   9  -1 1.59011 2.64160   1
  -6  -9   1 67.2048  7.9368   6
   6  -9  -1 47.4754  6.4183   1
  -6  -9   1 61.2775  7.7974   3
   6  -9  -1 63.6492  7.4966   2
   6  -9  -1 62.0792  7.4651   3
   6   9  -1 59.0535  6.7012   1
  -6   9   1 44.3913  6.3565   3
   6   9  -1 53.5291  7.6767   6
   6   9  -1 48.4120  6.6789   3
  -6   9   1 47.7676  6.6308   3
   6   9  -1 49.4159  6.5168   2
  -6   9   1 48.0069  6.4084   6
  -5  -9   1 16.6170  4.7662   3
   5  -9  -1 14.0665  4.1533   3
   5  -9  -1 6.97895 3.67999   2
   5  -9  -1 12.2161  3.3422   1
   5   9  -1 9.07494 3.66855   3
   5   9  -1 13.0589  3.2853   2
   5   9  -1 5.48235 2.85322   1
   5   9  -1 7.10150 4.83959   6
  -5   9   1 12.6222  3.7718   3
  -5   9   1 10.5210  3.6753   3
  -5   9   1 14.0589  3.2839   6
   4  -9  -1 4.58115 2.83956   3
   4  -9  -1 11.4995  2.5517   1
  -4  -9   1 5.08405 3.31870   3
   4  -9  -1 3.46469 2.68965   2
   4   9  -1 2.71404 2.20281   2
   4   9  -1 5.56323 3.39969   6
   4   9  -1 9.46933 2.65128   3
  -4   9   1 6.62124 2.56211   3
   4   9  -1 4.84185 2.05098   1
  -4   9   1 11.2405  2.8395   3
  -3  -9   1 158.013  17.506   1
   3   9  -1 211.714  17.725   3
   3   9  -1 192.784  17.222   1
   3   9  -1 185.706  17.275   2
   2  -9  -1 14.1911  2.2037   1
  -2  -9   1 11.0583  2.4141   1
   2   9  -1 17.4220  2.0600   1
  -2   9   1 7.59400 2.15842   3
   1  -9  -1 3.16569 1.50203   1
  -1  -9   1 0.98112 1.52247   1
  -1   9   1 1.74001 1.24117   1
   1   9  -1 0.84345 1.52712   3
  -1   9   1 1.28864 1.49978   3
   1   9  -1 2.15300 1.43106   2
   0  -9   1 11.1228  1.7006   1
   0  -9   1 10.9485  2.0776   5
   0  -9   1 10.9235  1.5175   1
   0  -9  -1 11.8081  2.0063   1
   0   9  -1 12.6173  1.6767   3
   0   9   1 11.6688  1.7244   1
   0   9  -1 10.8820  1.7935   3
   0   9   1 15.5611  2.1793   3
   0   9  -1 11.8112  1.9906   5
   1  -9   1 171.052  16.117   1
  -1  -9  -1 155.403  16.416   1
   1   9   1 185.242  16.313   1
   1   9   1 213.692  16.851   3
  -2  -9  -1 52.2747  6.5866   1
   2  -9   1 64.1123  6.0795   1
  -2  -9  -1 56.4201  6.2118   4
   2   9   1 71.5579  6.2354   1
   2   9   1 81.7186  6.7919   3
  -3  -9  -1 50.9261  5.9658   6
   3  -9   1 45.8619  5.1203   1
  -3  -9  -1 43.1966  5.7858   1
  -3  -9  -1 52.5975  5.8842   3
   3   9   1 55.9499  5.5200   3
   3   9   1 49.1374  5.0300   1
   4  -9   1 108.509  11.155   2
  -4  -9  -1 128.070  11.938   6
  -4  -9  -1 138.155  12.118   3
   4  -9   1 104.611  11.072   1
   4   9   1 120.199  11.630   3
   4   9   1 116.402  11.039   1
  -4   9  -1 111.417  10.876   3
   5  -9   1 175.845  16.759   1
   5  -9   1 197.222  16.887   2
  -5  -9  -1 180.529  17.804   3
  -5  -9  -1 161.051  17.617   6
   5   9   1 176.369  16.555   2
  -5   9  -1 184.032  16.713   3
  -5   9  -1 187.290  16.715   3
   5   9   1 160.890  17.395   3
   5   9   1 169.676  16.641   1
  -6  -9  -1 44.5454  6.3752   3
   6  -9   1 46.0286  6.3482   1
   6  -9   1 57.7923  6.5722   2
  -6  -9  -1 59.8888  7.4994   3
  -6  -9  -1 71.2392  7.6288   6
  -6   9  -1 52.6892  5.9672   3
   6   9   1 48.5865  6.5735   3
  -6   9  -1 46.5917  5.9691   3
   6   9   1 53.7302  6.2829   1
   6   9   1 64.8386  6.2380   2
  -7  -9  -1 36.8628  5.5396   3
   7  -9   1 31.4754  4.9388   2
   7  -9   1 30.8410  5.0614   1
   7   9   1 29.6956  5.4992   3
   7   9   1 47.4892  5.5672   1
  -7   9  -1 52.6870  5.3126   3
  -7   9  -1 49.3912  5.1946   3
   8  -9   1 -4.9526  2.7039   1
   8  -9   1 1.32179 2.78537   2
  -8  -9  -1 2.43850 3.54348   6
  -8  -9  -1 2.63641 4.17975   3
   8   9   1 8.27357 3.05501   1
  -8   9  -1 6.36634 2.58706   3
   8   9   1 4.72214 2.61621   2
   8   9   1 1.93106 4.02878   3
  -8   9  -1 3.44034 2.65172   3
   9  -9   1 0.91739 3.09127   2
  -9  -9  -1 2.54051 3.79061   6
   9  -9   1 -1.2209  3.3346   1
  -9  -9  -1 -3.3149  4.1071   3
  -9   9  -1 0.93153 2.96875   3
   9   9   1 -1.6748  2.7376   2
   9   9   1 4.41620 3.46521   1
  -9   9  -1 -0.9687  2.6355   3
 -10  -9  -1 20.4133  5.7527   3
  10  -9   1 21.2625  5.0381   1
 -10  -9  -1 16.6911  4.3133   6
  10   9   1 16.6014  4.0221   2
  10   9   1 12.8609  4.5695   1
 -10   9  -1 14.3443  3.9345   3
 -10   9  -1 12.7099  3.5227   3
  11  -9   1 23.3424  5.8531   1
 -11  -9  -1 42.2040  7.0322   3
  11   9   1 30.9865  6.1745   1
 -11   9  -1 25.5568  4.5232   3
  11   9   1 34.7925  5.2878   2
  12  -9   1 1.07780 4.76771   1
 -12  -9  -1 3.00883 4.86220   3
  12   9   1 -4.5295  4.6442   1
 -13  -9  -1 8.36598 5.01756   3
  13  -9   1 9.78558 5.63711   1
  13 -10  -1 0.22095 5.22602   1
 -13 -10   1 -8.4984  5.1918   3
  13  10  -1 -0.9705  4.0256   2
 -13  10   1 -5.0500  3.4672   3
  12 -10  -1 9.70812 5.33885   1
 -12 -10   1 14.1341  6.2105   3
 -12  10   1 4.79268 4.10360   3
  12  10  -1 9.96198 4.35213   2
  11 -10  -1 1.29355 4.28181   2
  11 -10  -1 3.48208 4.31206   1
 -11 -10   1 6.06740 5.79755   3
 -11  10   1 4.19486 4.07383   3
  11  10  -1 -2.2067  3.4727   2
  10 -10  -1 51.9116  7.9322   2
  10 -10  -1 52.3639  8.0771   1
 -10 -10   1 80.5639  9.9348   3
  10  10  -1 60.0100  7.7018   2
 -10  10   1 63.7204  8.0756   3
  10  10  -1 56.8537  8.3529   1
   9 -10  -1 2.32085 3.53468   1
  -9 -10   1 1.27667 5.51265   6
   9 -10  -1 4.50465 3.75275   2
  -9 -10   1 4.23842 4.97803   3
   9  10  -1 -3.6599  4.7134   3
  -9  10   1 1.46555 3.57374   3
   9  10  -1 1.15472 3.58431   1
   9  10  -1 -1.0579  3.1942   2
  -8 -10   1 191.795  18.539   3
   8 -10  -1 177.488  17.297   1
   8 -10  -1 187.626  17.572   2
  -8 -10   1 190.487  18.589   6
  -8  10   1 180.936  17.693   3
   8  10  -1 158.887  17.778   3
   8  10  -1 177.445  17.313   1
  -8  10   1 172.528  17.546   3
   8  10  -1 172.016  17.170   2
   7 -10  -1 2.07799 3.91990   3
  -7 -10   1 8.17751 4.09408   3
   7 -10  -1 6.89008 3.34023   2
  -7 -10   1 -0.6895  4.2078   6
   7 -10  -1 6.06375 2.85877   1
  -7  10   1 -2.1927  2.9632   3
   7  10  -1 -1.2250  3.3917   3
   7  10  -1 0.10623 2.71600   2
   7  10  -1 -2.8834  2.3653   1
  -7  10   1 -1.1902  3.1025   3
   7  10  -1 -1.4703  4.6475   6
   6 -10  -1 6.86770 3.91302   3
  -6 -10   1 2.14120 4.15557   3
   6 -10  -1 8.19114 3.12945   1
  -6 -10   1 5.52259 4.77961   6
   6 -10  -1 14.8853  3.6755   2
  -6  10   1 9.17587 3.40006   3
   6  10  -1 11.3922  3.3151   2
   6  10  -1 4.07438 2.82524   1
   6  10  -1 4.70774 4.98423   6
   6  10  -1 5.14422 3.52714   3
  -6  10   1 6.11031 3.35264   3
   5 -10  -1 5.64085 2.97722   1
   5 -10  -1 5.68922 3.47633   2
   5 -10  -1 2.86268 3.77792   3
  -5 -10   1 -5.7236  3.8710   3
  -5  10   1 5.96114 3.36265   3
   5  10  -1 2.46116 3.38799   3
   5  10  -1 -0.1094  2.3925   1
   5  10  -1 -2.4025  4.4639   6
  -5  10   1 -3.7374  3.0243   3
   5  10  -1 6.30925 3.01559   2
   4 -10  -1 -0.9172  2.5600   2
   4 -10  -1 3.04850 2.87365   3
  -4 -10   1 -4.0415  3.0545   3
  -4 -10   1 1.95939 2.70447   1
   4 -10  -1 2.81822 2.22906   1
  -4  10   1 -0.4413  2.6797   3
  -4  10   1 2.90487 2.41068   3
   4  10  -1 3.85751 3.37080   6
   4  10  -1 3.14543 2.17586   2
   4  10  -1 0.35858 2.49344   3
   4  10  -1 -1.4329  1.7937   1
   3 -10  -1 425.309  34.608   3
  -3 -10   1 364.271  33.995   1
   3 -10  -1 325.346  33.661   1
  -3  10   1 324.937  34.406   3
   3  10  -1 389.132  34.510   3
  -3  10   1 368.887  34.502   3
   3  10  -1 391.460  33.738   2
   3  10  -1 415.156  33.717   1
   2 -10  -1 0.93495 1.94570   3
   2 -10  -1 0.49929 1.39399   1
  -2 -10   1 0.15451 1.60171   1
  -2  10   1 -0.5063  1.4230   3
  -2  10   1 0.42615 1.13021   1
   2  10  -1 0.91390 1.18689   1
   2  10  -1 -1.1436  1.3151   2
   2  10  -1 -1.6454  1.5340   3
   1 -10  -1 2280.33  195.77   1
  -1 -10   1 2247.50  195.75   1
  -1  10   1 2187.17  200.16   3
   1  10  -1 2083.95  200.08   3
   1  10  -1 2176.20  195.42   2
  -1  10   1 2266.40  195.72   1
   0 -10  -1 2.50486 1.56376   1
   0 -10   1 0.72165 1.64026   5
   0 -10   1 1.29139 0.89801   1
   0 -10   1 2.66687 1.24511   1
   0  10  -1 1.14895 1.50230   5
   0  10   1 1.65491 0.94005   5
   0  10  -1 1.95763 1.19970   3
   0  10   1 4.91980 1.75533   3
   0  10   1 2.35970 1.20947   1
   0  10  -1 1.93383 1.39450   3
   1 -10   1 1447.73  140.24   1
  -1 -10  -1 1629.44  140.48   1
   1 -10   1 1514.85  141.25   5
   1 -10   1 1633.80  140.22   1
   1  10   1 1596.26  143.59   3
   1  10   1 1669.57  140.37   1
  -2 -10  -1 17.1682  2.1978   4
   2 -10   1 9.94523 2.02168   1
   2 -10   1 20.4464  2.1135   1
  -2 -10  -1 16.0116  2.7293   1
   2  10   1 17.7324  2.1989   1
   2  10   1 15.8542  2.4981   3
   3 -10   1 -0.2708  1.3891   1
  -3 -10  -1 -1.2623  2.2975   6
  -3 -10  -1 4.21356 2.28399   1
   3  10   1 1.25527 1.81036   3
   3  10   1 6.45207 1.54253   1
  -4 -10  -1 35.8133  5.1408   3
  -4 -10  -1 28.0494  4.8509   6
   4 -10   1 33.0755  3.9554   2
  -4 -10  -1 22.9259  4.6274   1
   4 -10   1 22.9180  3.8393   1
   4  10   1 26.4625  4.1826   3
   4  10   1 35.1094  4.0761   1
   5 -10   1 83.1033  8.8071   1
   5 -10   1 84.5651  8.9076   2
  -5 -10  -1 86.4266  9.8772   3
  -5 -10  -1 75.0151  9.7191   6
  -5  10  -1 75.9155  8.2069   3
   5  10   1 93.7034  8.6040   1
   5  10   1 81.4544  9.4872   3
   6 -10   1 144.711  13.309   2
   6 -10   1 140.721  13.352   1
  -6 -10  -1 133.581  14.127   3
  -6 -10  -1 136.289  14.070   6
   6  10   1 150.795  13.118   2
  -6  10  -1 136.731  13.030   3
   6  10   1 142.901  13.226   1
  -6  10  -1 125.653  12.986   3
   6  10   1 117.437  13.794   3
  -7 -10  -1 13.1066  4.1119   6
  -7 -10  -1 9.75477 4.36307   3
   7 -10   1 8.83361 2.90959   2
  -7 -10  -1 2.35967 3.37371   3
   7 -10   1 3.81023 2.80087   1
   7  10   1 5.03347 2.52539   2
   7  10   1 5.10299 2.61720   1
   7  10   1 4.56842 3.60290   3
  -7  10  -1 5.25689 2.36164   3
  -7  10  -1 7.82659 2.29429   3
   8 -10   1 144.180  14.290   2
  -8 -10  -1 164.844  15.610   3
  -8 -10  -1 148.273  15.017   6
   8 -10   1 154.496  14.668   1
  -8  10  -1 139.975  14.080   3
   8  10   1 148.835  14.497   1
   8  10   1 135.690  15.219   3
   8  10   1 141.571  14.104   2
  -8  10  -1 146.746  14.193   3
   9 -10   1 -1.8301  3.3675   1
  -9 -10  -1 -2.4307  3.9312   6
  -9 -10  -1 3.26420 4.48558   3
   9 -10   1 -3.0074  3.0023   2
  -9  10  -1 -0.6102  2.5560   3
   9  10   1 -0.0365  2.7797   2
   9  10   1 -0.4329  3.2489   1
  10 -10   1 40.3751  6.3147   1
 -10 -10  -1 24.3116  5.6329   6
 -10 -10  -1 38.3551  7.2722   3
  10  10   1 32.3503  5.4015   2
 -10  10  -1 42.4151  5.2085   3
  10  10   1 47.0218  6.6071   1
 -11 -10  -1 6.74873 5.10538   3
  11 -10   1 14.6946  4.8585   1
 -11 -10  -1 11.1067  4.0216   6
  11  10   1 3.51078 4.64092   1
 -12 -10  -1 1.62941 4.85928   3
  12 -10   1 7.26216 4.94335   1
  12  10   1 4.30483 5.09135   1
 -13 -10  -1 8.05111 5.02158   3
  13 -10   1 7.95990 5.48060   1
 -13 -11   1 -2.8032  5.5649   3
  13 -11  -1 1.75478 5.35222   1
  13  11  -1 1.04019 4.47121   2
 -13  11   1 -3.9537  3.5835   3
  12 -11  -1 0.02393 4.63481   1
 -12 -11   1 -0.5121  5.8933   3
  12  11  -1 3.84004 4.02405   2
 -12  11   1 0.93001 3.66643   3
  11 -11  -1 16.8861  4.9786   2
  11 -11  -1 6.93442 4.68794   1
 -11 -11   1 21.1181  6.4758   3
 -11  11   1 1.63260 3.96433   3
  11  11  -1 12.8339  4.1403   2
  10 -11  -1 10.6440  4.5648   1
 -10 -11   1 10.4942  5.7556   3
  10 -11  -1 11.0501  4.4753   2
  10  11  -1 5.68515 4.42889   1
 -10  11   1 11.0424  4.3176   3
  10  11  -1 1.26536 3.40122   2
   9 -11  -1 1.23319 3.55956   1
  -9 -11   1 5.44682 4.87460   3
   9 -11  -1 0.78236 3.77739   2
  -9  11   1 4.50550 3.77717   3
   9  11  -1 3.57268 4.79989   3
   9  11  -1 -4.0995  2.9730   2
   9  11  -1 4.04027 3.68171   1
  -8 -11   1 4.45160 4.58884   3
  -8 -11   1 11.2149  5.2994   6
   8 -11  -1 6.09645 3.39300   1
   8 -11  -1 7.46684 3.70356   2
   8  11  -1 5.62562 3.15606   2
  -8  11   1 5.20871 3.39420   3
   8  11  -1 2.12862 3.93436   3
  -8  11   1 7.37239 3.63215   3
   8  11  -1 3.35319 3.18216   1
   7 -11  -1 7.66988 4.15578   3
   7 -11  -1 6.10103 3.35732   2
   7 -11  -1 6.09984 3.01686   1
  -7 -11   1 6.98062 4.15879   3
  -7 -11   1 2.60496 4.46772   6
   7  11  -1 5.94088 3.02911   2
   7  11  -1 2.03864 5.33674   6
   7  11  -1 4.60101 2.82857   1
  -7  11   1 7.95179 3.23902   3
  -7  11   1 2.59705 3.23230   3
   7  11  -1 9.88951 3.64684   3
  -6 -11   1 6.74770 4.74577   6
   6 -11  -1 10.2329  3.6890   2
  -6 -11   1 5.81453 4.33398   3
   6 -11  -1 14.4020  3.3917   1
   6 -11  -1 7.22582 4.04389   3
  -6  11   1 10.2702  3.4086   3
   6  11  -1 10.4367  3.2171   2
   6  11  -1 8.13197 2.95847   1
  -6  11   1 11.2860  3.4964   3
   6  11  -1 9.92746 3.58738   3
   6  11  -1 9.27234 5.23251   6
   5 -11  -1 26.9103  5.1905   3
  -5 -11   1 46.0699  6.1248   3
   5 -11  -1 24.6758  4.9032   2
   5 -11  -1 32.1433  4.7151   1
   5  11  -1 32.1506  4.9705   3
  -5  11   1 32.0466  4.7305   3
   5  11  -1 28.6352  4.2551   1
   5  11  -1 21.9892  4.4042   2
   5  11  -1 35.7508  6.1338   6
  -5  11   1 30.4575  4.7814   3
   4 -11  -1 4.38147 2.63242   1
  -4 -11   1 9.63127 3.34900   1
   4 -11  -1 8.31018 3.27327   3
  -4 -11   1 10.8950  3.8148   3
   4  11  -1 7.09721 2.33666   1
  -4  11   1 4.79396 2.73448   3
  -4  11   1 9.82296 3.12410   3
   4  11  -1 7.14243 2.90752   3
   4  11  -1 8.81941 2.62004   2
  -3 -11   1 14.4923  3.1904   1
   3 -11  -1 27.7665  3.4694   3
   3 -11  -1 18.4900  2.9273   1
  -3  11   1 24.1083  3.0871   3
   2 -11  -1 12.5323  2.0062   1
  -2 -11   1 8.68956 2.22542   1
  -1 -11   1 30.4237  3.4669   1
   1 -11  -1 36.8472  3.6237   1
  -1  11   1 23.3368  3.2369   1
   1  11  -1 34.1785  3.7249   3
  -1  11   1 23.1646  3.3372   3
   0 -11   1 12.9711  1.8611   1
   0 -11   1 12.4761  1.6011   1
   0 -11  -1 9.48650 2.04273   1
   0 -11   1 15.2834  2.1718   5
   0  11  -1 8.86568 1.83049   3
   0  11   1 11.3751  1.8022   1
   0  11   1 13.7186  2.2029   3
   0  11  -1 13.5527  2.0539   5
   0  11  -1 9.33906 1.67914   3
   0  11   1 10.3423  1.4781   5
   1 -11   1 72.1606  7.4483   1
  -1 -11  -1 92.5652  7.8070   1
   2 -11   1 66.1853  5.9604   1
   2 -11   1 49.6293  6.0066   1
  -2 -11  -1 56.3121  6.0435   4
  -2 -11  -1 60.0888  6.4902   1
   2  11   1 72.8039  6.1672   1
   2  11   1 75.8345  6.6620   3
   3 -11   1 0.58925 1.45423   1
  -3 -11  -1 0.73238 2.48656   6
  -3 -11  -1 2.27990 1.29831   4
  -3 -11  -1 3.55596 2.32299   1
   3  11   1 1.98187 1.88726   3
   3  11   1 0.95902 1.36379   1
  -4 -11  -1 33.9135  5.3571   1
  -4 -11  -1 30.5340  5.4565   3
   4 -11   1 43.6453  5.0723   2
   4 -11   1 31.8794  4.3926   1
  -4 -11  -1 38.2724  5.5384   6
   4  11   1 31.7729  4.8173   3
   4  11   1 40.7274  4.6576   1
  -5 -11  -1 415.579  31.719   6
   5 -11   1 315.599  30.280   2
   5 -11   1 308.715  30.250   1
  -5  11  -1 323.979  30.503   3
   5  11   1 336.851  31.235   3
   5  11   1 322.191  30.259   1
   6 -11   1 5.48115 2.79022   1
  -6 -11  -1 3.36425 3.78917   6
   6 -11   1 4.47214 2.82771   2
  -6 -11  -1 1.83178 3.86984   3
  -6  11  -1 4.68146 1.94788   3
   6  11   1 1.94002 2.24493   1
   6  11   1 4.08013 3.32699   3
  -7 -11  -1 11.5344  4.5503   3
   7 -11   1 16.1247  3.5316   1
  -7 -11  -1 12.6458  4.2711   6
   7 -11   1 13.0847  3.3820   2
  -7 -11  -1 11.7163  3.9255   3
   7  11   1 12.4282  4.1040   3
  -7  11  -1 11.1980  2.5442   3
   7  11   1 18.0501  3.2578   2
  -7  11  -1 12.4162  2.7224   3
   7  11   1 14.6123  3.2340   1
  -8 -11  -1 10.4594  4.6021   3
   8 -11   1 10.4904  3.5204   1
   8 -11   1 4.94592 3.17538   2
  -8 -11  -1 3.01591 4.17520   6
  -8  11  -1 9.50302 2.61942   3
   8  11   1 10.8529  3.3785   1
   8  11   1 7.90325 2.96872   2
   8  11   1 7.43499 4.51503   3
   9 -11   1 10.9549  3.6939   2
  -9 -11  -1 19.0743  4.7692   6
  -9 -11  -1 8.10444 4.92579   3
   9 -11   1 13.9132  4.2503   1
   9  11   1 12.3541  3.4480   2
  -9  11  -1 8.36239 2.79208   3
   9  11   1 10.9649  3.9071   1
 -10 -11  -1 3.96545 4.04145   6
 -10 -11  -1 11.5503  5.1670   3
  10 -11   1 4.95435 4.03469   1
  10  11   1 -0.0236  3.8524   1
 -10  11  -1 4.89809 2.73668   3
 -11 -11  -1 26.7475  4.8148   6
  11 -11   1 16.9509  5.2671   1
 -11 -11  -1 11.3435  5.9056   3
  11  11   1 22.0412  5.5428   1
  12 -11   1 1.19409 4.40684   1
 -12 -11  -1 3.69181 5.13759   3
 -13 -11  -1 19.9202  6.1336   3
  13 -11   1 24.1812  6.4321   1
 -13 -12   1 0.54231 5.76312   3
  13 -12  -1 -3.8811  5.0867   1
  13  12  -1 0.55251 4.39088   2
 -13  12   1 -1.8109  3.6572   3
  12 -12  -1 7.97999 5.18849   1
 -12 -12   1 2.20081 6.01801   3
  12  12  -1 -0.9316  3.7279   2
 -12  12   1 5.27508 3.88693   3
  11 -12  -1 23.2261  5.8062   2
  11 -12  -1 19.0235  5.7825   1
 -11 -12   1 30.8234  7.0739   3
  11  12  -1 31.0353  5.3460   2
 -11  12   1 26.2145  5.2770   3
  10 -12  -1 -0.5367  3.8699   1
  10 -12  -1 -4.3736  3.9857   2
 -10 -12   1 0.69429 5.26333   3
  10  12  -1 -3.6935  3.1109   2
 -10  12   1 6.86587 3.81115   3
  10  12  -1 2.48514 4.28178   1
  -9 -12   1 1.15174 4.70710   3
   9 -12  -1 0.75425 3.38580   1
   9 -12  -1 0.61137 3.93896   2
   9  12  -1 -0.2716  3.2584   2
   9  12  -1 -3.4223  3.4184   1
  -9  12   1 -0.2324  3.5859   3
   9  12  -1 -0.3264  4.5401   3
  -8 -12   1 2.14043 5.18162   6
  -8 -12   1 -3.1055  4.3399   3
   8 -12  -1 -2.4641  3.4013   2
   8 -12  -1 -2.2117  2.9392   1
   8  12  -1 3.10186 3.95486   3
  -8  12   1 -0.3049  3.4754   3
   8  12  -1 2.09844 3.18567   1
   8  12  -1 -2.4891  2.8136   2
  -8  12   1 0.10266 3.04690   3
   7 -12  -1 58.1129  7.2659   3
   7 -12  -1 56.3799  6.5979   1
   7 -12  -1 48.6743  6.7424   2
  -7 -12   1 52.0527  7.7659   6
  -7 -12   1 54.3158  7.6753   3
   7  12  -1 40.5874  6.6712   3
   7  12  -1 50.2222  6.4274   1
   7  12  -1 52.7989  8.0635   6
  -7  12   1 51.2020  6.6549   3
  -7  12   1 51.1571  6.4438   3
   7  12  -1 51.8954  6.4393   2
   6 -12  -1 5.57477 3.66281   2
   6 -12  -1 10.1737  3.2814   1
   6 -12  -1 11.1651  4.0688   3
  -6 -12   1 5.47679 4.45682   3
  -6  12   1 8.74588 3.46251   3
   6  12  -1 14.1688  3.8193   3
   6  12  -1 15.3615  3.4266   2
   6  12  -1 21.1045  5.4164   6
  -6  12   1 14.7099  3.5339   3
   6  12  -1 14.0123  3.1977   1
   5 -12  -1 135.551  14.433   3
   5 -12  -1 151.600  13.863   1
  -5 -12   1 139.636  14.790   3
   5 -12  -1 148.438  14.260   2
   5  12  -1 120.503  14.219   3
   5  12  -1 115.151  14.965   6
  -5  12   1 126.419  14.112   3
  -5  12   1 151.316  14.215   3
   5  12  -1 160.514  13.814   1
   5  12  -1 160.034  13.879   2
   4 -12  -1 4.79386 3.31037   3
  -4 -12   1 15.3485  3.9356   3
   4 -12  -1 3.13790 2.60952   1
  -4 -12   1 -0.2581  3.1096   1
   4  12  -1 6.91563 2.67478   2
   4  12  -1 5.30755 2.37003   1
  -4  12   1 6.77918 2.76640   3
  -4  12   1 6.21007 3.15668   3
   4  12  -1 2.78812 3.00935   3
  -3 -12   1 4.05721 2.28033   1
   3 -12  -1 3.80046 2.42753   3
   3 -12  -1 3.92433 1.92186   1
  -3  12   1 3.47846 2.34442   3
  -3  12   1 3.32523 1.92067   3
   3  12  -1 5.06865 2.11168   3
   3  12  -1 7.42712 1.96996   2
   3  12  -1 7.61851 1.81875   1
   2 -12  -1 1732.26  149.99   3
  -2 -12   1 1646.29  146.70   1
   2 -12  -1 1707.66  146.63   1
   2  12  -1 1570.68  146.49   1
  -2  12   1 1661.77  149.87   3
   2  12  -1 1603.93  149.86   3
   2  12  -1 1633.62  146.37   2
  -1 -12   1 1.95741 1.50451   1
   1 -12  -1 -0.2393  1.3691   1
  -1  12   1 2.95127 1.25176   1
   1  12  -1 0.77693 1.38436   3
  -1  12   1 1.34948 1.52966   3
   0 -12   1 108.181   9.693   5
   0 -12  -1 91.7969  9.5954   1
   0 -12   1 101.538   9.509   1
   0 -12   1 95.3261  9.3983   1
   0  12   1 101.926   9.564   1
   0  12  -1 111.819   9.670   3
   0  12  -1 99.2294  9.6407   5
   0  12   1 103.263   9.344   5
   0  12  -1 102.497   9.706   3
   0  12   1 97.9989  9.9295   3
   1 -12   1 3.94934 1.51231   5
  -1 -12  -1 0.38686 1.57687   1
   1 -12   1 0.24668 0.82745   1
   1 -12   1 1.88735 1.18301   1
   1  12   1 3.69122 1.72588   3
   1  12   1 0.09888 1.14647   1
   2 -12   1 24.9471  3.4779   1
  -2 -12  -1 33.7029  4.0073   1
  -2 -12  -1 37.2230  3.6356   4
   2 -12   1 35.1191  3.3984   1
   2  12   1 30.2656  4.0865   3
   2  12   1 29.6949  3.5883   1
  -3 -12  -1 4.18313 1.46239   4
   3 -12   1 3.76222 1.64081   1
  -3 -12  -1 4.16448 2.35464   1
   3  12   1 4.90714 1.69747   1
   3  12   1 3.76738 2.10367   3
  -4 -12  -1 34.9493  5.0459   1
  -4 -12  -1 22.9385  4.9342   3
   4 -12   1 26.0263  3.9285   1
  -4 -12  -1 25.4992  5.1356   6
   4  12   1 34.6903  4.0133   1
   4  12   1 22.2141  4.3293   3
  -5 -12  -1 303.136  29.433   6
  -5 -12  -1 298.862  29.507   3
   5 -12   1 308.061  28.334   1
   5 -12   1 335.708  28.364   2
   5  12   1 269.865  29.125   3
  -5  12  -1 314.184  28.443   3
   5  12   1 332.731  28.295   1
   6 -12   1 3.17773 2.77458   2
  -6 -12  -1 4.47995 3.91089   6
   6 -12   1 4.15959 2.73338   1
  -6 -12  -1 -1.8387  3.7417   3
  -6  12  -1 1.80897 1.75681   3
   6  12   1 2.90497 2.35514   1
   6  12   1 5.13510 3.28060   3
  -7 -12  -1 6.59418 3.97085   6
   7 -12   1 5.27482 2.98292   2
   7 -12   1 7.11297 2.75151   1
  -7 -12  -1 6.08884 4.07432   3
   7  12   1 7.40877 2.70637   1
  -7  12  -1 1.45196 1.89569   3
   7  12   1 3.62443 3.65094   3
   8 -12   1 -1.1026  3.0106   2
   8 -12   1 3.73975 3.16768   1
  -8 -12  -1 2.04302 4.28341   6
  -8 -12  -1 0.14277 4.22731   3
   8  12   1 -1.3805  4.2697   3
  -8  12  -1 1.76175 2.11417   3
   8  12   1 0.30812 2.89442   1
   9 -12   1 171.394  17.872   2
  -9 -12  -1 197.052  18.853   6
  -9 -12  -1 183.503  19.391   3
   9 -12   1 208.745  18.526   1
  -9  12  -1 185.287  17.692   3
   9  12   1 183.659  18.205   1
 -10 -12  -1 6.63169 4.94882   3
  10 -12   1 -4.1221  3.7761   1
 -10 -12  -1 -0.0040  4.3028   6
  10  12   1 -2.6746  3.8133   1
 -11 -12  -1 20.5580  4.9132   6
  11 -12   1 16.6688  5.3668   1
 -11 -12  -1 26.1715  6.3502   3
  11  12   1 27.4937  5.9110   1
  12 -12   1 -2.6462  4.4074   1
 -12 -12  -1 -2.1945  4.6616   3
 -13 -12  -1 9.26212 5.68013   3
  13 -12   1 12.1306  5.7780   1
  13 -13  -1 3.45956 5.64124   1
 -13 -13   1 -5.2206  5.5049   3
 -13  13   1 -0.9985  3.6590   3
  13  13  -1 2.09830 4.45258   2
 -12 -13   1 4.08794 6.27226   3
  12 -13  -1 -4.8503  4.6376   1
 -12  13   1 1.18119 3.68405   3
  12  13  -1 4.61230 4.13856   2
  11 -13  -1 0.14373 4.36557   1
 -11 -13   1 -3.1008  4.9534   3
  11 -13  -1 -7.4007  4.2940   2
 -11  13   1 3.75030 3.71729   3
  11  13  -1 -0.4397  3.5745   2
 -10 -13   1 -3.0650  5.2280   3
  10 -13  -1 4.10981 4.21068   1
  10 -13  -1 6.82326 4.52150   2
  10  13  -1 3.26076 4.44973   1
  10  13  -1 -1.4597  3.4444   2
 -10  13   1 11.1471  3.8639   3
  -9 -13   1 9.56500 5.34622   3
   9 -13  -1 -1.9121  3.5467   1
   9 -13  -1 -1.3729  3.9569   2
  -9  13   1 6.02760 3.71337   3
   9  13  -1 -3.5596  3.0633   2
   9  13  -1 2.13661 3.82138   1
   9  13  -1 2.69771 4.70791   3
   8 -13  -1 0.11840 3.13610   1
  -8 -13   1 -1.9449  4.1792   3
   8 -13  -1 5.04083 3.84661   2
   8  13  -1 -0.7197  3.0588   1
  -8  13   1 -0.8393  3.4669   3
   8  13  -1 0.63719 3.94745   3
   8  13  -1 -1.5231  2.7854   2
  -8  13   1 -0.7934  3.0079   3
  -7 -13   1 8.23864 5.28057   6
   7 -13  -1 10.5897  3.4446   1
  -7 -13   1 8.73959 4.50324   3
   7 -13  -1 13.1063  4.4508   3
   7 -13  -1 15.1208  3.8771   2
   7  13  -1 9.65202 5.50936   6
   7  13  -1 9.39626 3.74056   3
   7  13  -1 18.3701  3.5684   2
   7  13  -1 10.7398  3.3876   1
  -7  13   1 15.0829  3.6287   3
  -7  13   1 11.6979  3.4200   3
   6 -13  -1 79.9730  7.9928   1
  -6 -13   1 86.2516  9.0994   3
   6 -13  -1 68.5775  8.7867   3
   6 -13  -1 58.5099  8.2931   2
  -6  13   1 67.5686  8.1340   3
   6  13  -1 75.7763  7.8976   2
   6  13  -1 71.1702  8.4251   3
  -6  13   1 65.3043  7.9981   3
   6  13  -1 70.1404  7.8370   1
   6  13  -1 64.2589  9.0482   6
   5 -13  -1 700.434  61.123   1
  -5 -13   1 683.201  62.939   3
   5 -13  -1 710.245  62.606   3
   5 -13  -1 705.112  61.242   2
  -5  13   1 730.163  62.406   3
   5  13  -1 658.477  60.957   2
   5  13  -1 615.356  60.949   1
  -5  13   1 698.902  62.317   3
   5  13  -1 624.046  62.402   3
   4 -13  -1 12.2943  3.1827   1
   4 -13  -1 16.3970  3.8500   3
  -4 -13   1 12.6180  3.7826   1
   4  13  -1 13.5303  2.8923   1
   4  13  -1 12.5086  3.1063   2
   4  13  -1 15.4279  3.6190   3
  -4  13   1 9.02196 3.06229   3
  -4  13   1 8.10138 3.48099   3
  -3 -13   1 81.4518  9.6803   1
   3 -13  -1 98.4537  9.4591   1
   3 -13  -1 114.698  10.041   3
   3  13  -1 77.4398  9.3052   2
  -3  13   1 116.737   9.893   3
   3  13  -1 99.2155  9.3514   1
   3  13  -1 98.3283  9.7575   3
  -2 -13   1 172.264  14.088   1
   2 -13  -1 118.862  13.804   1
  -2  13   1 137.907  14.152   3
   2  13  -1 176.259  13.826   1
   1 -13  -1 4.42440 1.70799   1
   1 -13  -1 6.37692 1.28792   5
  -1 -13   1 6.76633 1.82576   1
  -1  13   1 6.34452 1.54070   1
   1  13  -1 6.73086 1.66159   3
  -1  13   1 5.40516 1.79969   3
   0 -13  -1 3.07077 1.56366   1
   0 -13   1 3.65183 1.35625   1
   0 -13   1 1.65585 0.98418   1
   0  13   1 2.74505 1.28212   1
   0  13  -1 4.54611 1.52381   5
   0  13   1 3.85025 0.97562   5
   0  13  -1 2.65568 1.27809   3
   0  13   1 2.56662 1.71601   3
   0  13  -1 1.42924 1.45781   3
  -1 -13  -1 0.67484 1.62841   1
   1 -13   1 -0.0519  1.1488   1
   1 -13   1 1.77654 0.88592   1
   1 -13   1 2.26632 1.52312   5
   1  13   1 -0.2139  1.6919   3
  -1  13  -1 0.93253 0.95106   3
   1  13   1 2.70854 1.27543   1
   2 -13   1 3.38790 1.11794   1
  -2 -13  -1 0.10995 1.43029   4
  -2 -13  -1 -1.2197  1.7279   1
   2 -13   1 3.32630 1.37881   1
   2  13   1 3.53622 1.86728   3
   2  13   1 1.76706 1.27360   1
   3 -13   1 89.4063  9.5146   1
  -3 -13  -1 97.3745 10.1023   1
  -3 -13  -1 113.461   9.296   4
   3  13   1 106.191  10.066   3
   3  13   1 88.7766  9.4921   1
  -4 -13  -1 36.4368  5.3152   3
   4 -13   1 21.5723  3.7868   1
  -4 -13  -1 26.0793  4.9470   6
  -4 -13  -1 23.9976  4.8726   1
   4  13   1 23.9927  3.7035   1
   4  13   1 27.5912  4.4390   3
   5 -13   1 94.1482  8.3995   2
   5 -13   1 59.8932  7.9735   1
  -5 -13  -1 70.9811  9.0376   3
  -5 -13  -1 68.8527  9.1153   6
   5  13   1 81.7968  7.9458   1
   5  13   1 70.6968  8.8674   3
   6 -13   1 29.8585  4.9104   2
  -6 -13  -1 37.9494  6.2200   3
  -6 -13  -1 52.6100  6.3534   6
   6 -13   1 41.2208  5.1274   1
  -6  13  -1 33.7841  4.2106   3
   6  13   1 35.7719  4.8649   1
   6  13   1 40.5738  5.4727   3
   7 -13   1 1.85454 2.79176   2
   7 -13   1 5.44891 2.79382   1
  -7 -13  -1 -1.8325  3.9420   6
  -7 -13  -1 4.08996 3.84913   3
   7  13   1 1.37711 2.40943   1
   7  13   1 -0.9805  3.6353   3
   8 -13   1 -3.5738  3.0564   2
  -8 -13  -1 5.57344 4.50856   3
  -8 -13  -1 3.78668 4.47381   6
   8 -13   1 4.44214 3.18657   1
  -8  13  -1 -1.5752  1.9897   3
   8  13   1 4.53984 3.05132   1
   8  13   1 12.8116  4.6314   3
  -9 -13  -1 24.7725  6.0366   3
   9 -13   1 18.2659  4.7964   1
   9 -13   1 26.8126  4.6302   2
  -9 -13  -1 28.6931  5.6649   6
   9  13   1 7.95586 4.19582   1
  -9  13  -1 28.5065  3.6652   3
  10 -13   1 4.09227 3.98830   1
 -10 -13  -1 8.21377 5.29219   3
 -10 -13  -1 13.7130  5.0364   6
  10  13   1 11.5430  4.6679   1
  11 -13   1 4.79828 4.47020   1
 -11 -13  -1 8.75998 5.43145   3
 -11 -13  -1 4.77870 4.15736   6
  11  13   1 1.96375 4.42099   1
  12 -13   1 -0.3660  4.5326   1
 -12 -13  -1 5.06265 5.33528   3
 -13 -13  -1 9.35561 5.67421   3
  13 -13   1 21.7897  6.2980   1
 -13 -14   1 2.36585 6.21226   3
  13 -14  -1 7.72862 5.92423   1
 -13  14   1 -2.1647  3.4329   3
  13  14  -1 -1.3078  4.1556   2
 -12 -14   1 24.7985  8.0290   3
  12 -14  -1 49.0537  7.7162   1
 -12  14   1 33.3005  5.7626   3
  12  14  -1 36.9989  6.3602   2
  11 -14  -1 7.09857 4.62318   1
 -11 -14   1 2.39915 5.38933   3
  11  14  -1 -1.0047  3.4942   2
 -11  14   1 -0.5350  3.3148   3
  10 -14  -1 78.9628  9.8514   1
  10 -14  -1 68.4946  9.8042   2
 -10 -14   1 95.3825 11.7712   3
 -10  14   1 80.0554  9.3200   3
  10  14  -1 85.8812  9.4076   2
   9 -14  -1 0.52362 3.66371   1
   9 -14  -1 1.27831 4.06127   2
  -9 -14   1 4.83103 5.18235   3
   9  14  -1 -3.2596  4.5621   3
   9  14  -1 4.42691 3.90507   1
   9  14  -1 -2.3200  3.0393   2
  -9  14   1 -0.7014  3.3965   3
   8 -14  -1 28.0208  5.5105   2
  -8 -14   1 24.3913  6.1362   3
   8 -14  -1 26.0157  5.1524   1
   8  14  -1 17.9887  5.3149   3
   8  14  -1 26.0430  5.0610   1
   8  14  -1 32.4276  4.9600   2
  -8  14   1 32.5957  5.1925   3
  -8  14   1 38.4092  5.1424   3
  -7 -14   1 -1.6269  3.8188   3
   7 -14  -1 -1.6109  3.0606   2
  -7 -14   1 2.36164 5.11822   6
   7 -14  -1 3.76675 2.91497   1
   7 -14  -1 3.51975 4.10233   3
   7  14  -1 -1.1808  5.1300   6
   7  14  -1 4.44326 3.07475   1
   7  14  -1 -1.6879  2.5805   2
   7  14  -1 1.30659 3.44106   3
  -7  14   1 -1.4816  3.0435   3
  -7  14   1 -3.2266  2.6051   3
   6 -14  -1 86.9887  9.5019   1
  -6 -14   1 83.5889 10.4501   3
   6 -14  -1 87.1682 10.3773   3
   6 -14  -1 87.2326  9.9738   2
   6  14  -1 78.8340 10.6392   6
   6  14  -1 98.4135  9.4941   2
   6  14  -1 102.312   9.567   1
   6  14  -1 82.3068  9.9019   3
  -6  14   1 96.9795  9.8634   3
  -6  14   1 93.8424  9.7209   3
   5 -14  -1 385.686  35.673   3
  -5 -14   1 344.351  35.854   3
   5 -14  -1 399.149  34.714   1
   5 -14  -1 436.510  35.016   2
  -5 -14   1 422.233  35.393   1
  -5  14   1 346.365  35.323   3
  -5  14   1 356.866  35.321   3
   5  14  -1 332.486  35.437   3
   5  14  -1 381.454  34.614   2
   5  14  -1 421.877  34.653   1
   4 -14  -1 0.13659 2.62538   1
   4 -14  -1 0.34937 3.50780   3
  -4 -14   1 -1.2817  3.1668   1
   4  14  -1 1.69631 3.24206   3
   4  14  -1 3.38176 2.66237   2
  -4  14   1 2.72356 2.77571   3
  -4  14   1 6.36894 3.32338   3
   4  14  -1 1.36328 2.31702   1
  -3 -14   1 280.854  24.173   1
   3 -14  -1 252.421  23.852   1
   3 -14  -1 276.266  24.557   3
  -3  14   1 260.051  24.392   3
  -3  14   1 255.822  24.305   3
   3  14  -1 264.445  23.808   2
   3  14  -1 260.587  23.743   1
   3  14  -1 245.212  24.365   3
  -2 -14   1 6.45599 2.11676   1
   2 -14  -1 2.83573 2.23986   3
   2 -14  -1 3.98718 1.84322   1
   2  14  -1 8.69491 1.61715   1
   2  14  -1 9.08885 2.07548   3
  -2  14   1 4.74837 1.82885   3
  -2  14   1 2.95833 1.91489   3
  -2  14   1 -0.4250  1.0079   1
   1 -14  -1 1117.69  101.65   5
   1 -14  -1 1100.38  101.28   1
  -1 -14   1 1156.84  101.29   1
  -1  14   1 1163.12  101.22   1
  -1  14   1 1172.99  103.55   3
   1  14  -1 1121.71  103.45   3
   0 -14  -1 -1.1674  1.4677   1
   0 -14   1 0.75610 1.31225   1
   0 -14   1 0.14943 0.99163   1
   0  14  -1 -0.4645  1.3741   5
   0  14   1 -1.2278  0.9682   5
   0  14   1 -0.8815  1.6101   3
   0  14  -1 -0.6912  1.4492   3
   0  14  -1 0.53459 1.22711   3
   0  14   1 -0.3999  1.1864   1
   1 -14   1 18.8294  2.7424   5
  -1 -14  -1 17.3465  2.8749   1
   1 -14   1 18.9457  2.4701   1
   1 -14   1 19.9099  2.3764   1
   1  14   1 17.3388  2.8604   3
  -1  14  -1 19.0243  2.4518   3
   1  14   1 18.3125  2.5522   1
   2 -14   1 11.7315  2.2336   1
  -2 -14  -1 17.4634  2.3423   4
   2 -14   1 20.5847  2.2668   1
  -2 -14  -1 18.7706  3.0097   1
   2  14   1 12.9701  2.6853   3
   2  14   1 19.2115  2.4732   1
  -3 -14  -1 224.587  20.605   1
   3 -14   1 208.861  20.109   1
  -3 -14  -1 218.890  19.852   4
   3  14   1 234.009  20.225   1
   3  14   1 217.558  20.768   3
   4 -14   1 11.9192  3.1626   1
  -4 -14  -1 16.4150  4.2510   1
  -4 -14  -1 22.9764  4.6691   6
   4  14   1 20.7584  3.1958   1
   4  14   1 12.6210  3.7986   3
  -5 -14  -1 16.3356  4.6514   3
  -5 -14  -1 12.8348  4.5449   6
   5 -14   1 25.5204  3.7217   2
   5 -14   1 15.4408  3.5538   1
  -5 -14  -1 18.3846  4.7213   1
   5  14   1 23.1402  3.4600   1
   5  14   1 16.1670  4.1275   3
   6 -14   1 286.179  24.931   2
  -6 -14  -1 254.828  25.947   6
  -6 -14  -1 278.366  26.097   3
   6 -14   1 290.543  24.952   1
   6  14   1 257.861  24.807   1
   6  14   1 248.411  25.620   3
  -7 -14  -1 -2.1851  3.6850   3
  -7 -14  -1 2.29149 3.96679   6
   7 -14   1 -0.3938  2.7469   2
   7 -14   1 4.33791 2.78383   1
   7  14   1 2.42747 2.47271   1
   7  14   1 2.33469 3.67067   3
  -8 -14  -1 85.7216  9.9829   3
  -8 -14  -1 78.6361  9.9915   6
   8 -14   1 74.1622  8.9211   2
   8 -14   1 87.3799  8.9458   1
   8  14   1 68.5145  8.6789   1
   8  14   1 77.3707  9.8891   3
   9 -14   1 -0.7806  3.4415   2
  -9 -14  -1 -1.0627  4.7334   3
  -9 -14  -1 1.27587 4.81633   6
   9 -14   1 -1.6340  3.3177   1
   9  14   1 -0.1192  3.4332   1
 -10 -14  -1 98.5666 12.1519   3
  10 -14   1 109.906  11.360   1
 -10 -14  -1 88.5306 11.5459   6
  10  14   1 98.3790 11.5201   1
 -11 -14  -1 8.08245 5.73830   3
 -11 -14  -1 -4.8869  4.0771   6
  11 -14   1 -1.0231  4.1115   1
  11  14   1 -4.2476  4.3124   1
 -12 -14  -1 -2.7298  3.8847   6
  12 -14   1 7.07825 4.73545   1
 -12 -14  -1 -2.4821  5.2098   3
  13 -14   1 3.87576 5.49606   1
 -13 -14  -1 3.77002 5.42909   3
  13 -15  -1 8.76713 6.19995   1
 -13 -15   1 9.68701 6.82360   3
  13  15  -1 4.82306 4.71215   2
 -13  15   1 11.3973  3.8377   3
  12 -15  -1 38.4453  7.6498   1
 -12 -15   1 47.9448  8.7286   3
  12  15  -1 40.3243  6.8087   2
 -12  15   1 45.4321  6.3428   3
 -11 -15   1 3.45394 5.74013   3
  11 -15  -1 2.56204 4.61463   1
  11  15  -1 5.92464 4.00698   2
 -11  15   1 4.66340 3.54024   3
 -10 -15   1 19.4757  6.2853   3
  10 -15  -1 11.1524  4.6672   1
  10 -15  -1 14.6522  5.1181   2
 -10  15   1 13.0022  4.0600   3
  10  15  -1 7.46377 3.91592   2
   9 -15  -1 -4.4189  3.9404   2
   9 -15  -1 9.12743 4.11502   1
  -9 -15   1 6.25866 5.16655   3
   9  15  -1 6.36639 5.06652   3
  -9  15   1 5.73914 3.66393   3
   9  15  -1 7.08830 4.08916   1
   9  15  -1 14.5398  3.7987   2
   8 -15  -1 9.32070 4.14081   2
  -8 -15   1 11.7437  5.0388   3
   8 -15  -1 9.17384 3.79207   1
   8  15  -1 14.1079  3.6716   2
   8  15  -1 8.14822 3.70585   1
  -8  15   1 6.51063 3.38763   3
   8  15  -1 3.05457 4.21910   3
  -7 -15   1 -3.3657  5.0200   6
   7 -15  -1 -0.2244  4.0922   3
  -7 -15   1 2.95589 4.25569   3
   7 -15  -1 1.37633 2.82393   1
   7 -15  -1 1.23093 3.21561   2
   7  15  -1 -3.1768  4.8180   6
   7  15  -1 -1.8184  2.6760   2
   7  15  -1 -2.0516  3.2348   3
   7  15  -1 -1.6166  2.7779   1
  -7  15   1 -1.0655  3.1152   3
  -7  15   1 -1.1215  2.6635   3
   6 -15  -1 45.0445  6.0803   2
   6 -15  -1 41.5189  6.5469   3
   6 -15  -1 39.7564  5.7353   1
  -6 -15   1 36.5048  6.7176   3
  -6  15   1 61.2910  6.1170   3
   6  15  -1 38.8501  5.5254   2
  -6  15   1 50.8752  6.3179   3
   6  15  -1 39.7178  5.5273   1
   6  15  -1 48.3380  6.1693   3
  -5 -15   1 497.142  47.190   1
   5 -15  -1 550.649  47.980   3
  -5 -15   1 575.890  48.337   3
   5 -15  -1 514.774  46.716   1
  -5  15   1 535.702  47.680   3
   5  15  -1 492.360  47.780   3
   5  15  -1 481.924  46.619   1
  -5  15   1 512.329  47.627   3
   5  15  -1 504.606  46.613   2
  -4 -15   1 94.7828 10.5084   1
   4 -15  -1 84.7137  9.8955   1
   4 -15  -1 102.440  10.736   3
  -4  15   1 109.261  10.344   3
  -4  15   1 108.573  10.239   3
   4  15  -1 92.1621  9.8140   1
   4  15  -1 88.5680 10.4715   3
   4  15  -1 99.9797  9.9468   2
  -3 -15   1 22.9081  4.1065   1
   3 -15  -1 27.8347  4.3417   3
   3 -15  -1 17.4731  3.6187   1
   3  15  -1 35.8089  3.9816   1
   3  15  -1 32.9050  4.1198   3
  -2 -15   1 0.18035 1.92416   1
   2 -15  -1 6.54903 1.93945   1
   2 -15  -1 1.61046 2.14442   3
  -2  15   1 7.23265 2.30582   3
  -2  15   1 3.65297 1.76500   3
   2  15  -1 0.71835 1.27371   1
   2  15  -1 -0.5293  1.7376   3
   1 -15  -1 10.9156  1.8594   5
   1 -15  -1 16.1083  2.4194   1
  -1 -15   1 18.3243  2.5182   1
  -1  15   1 14.3481  2.5174   3
  -1  15   1 15.1710  2.1719   1
   0 -15  -1 1.98990 1.57722   1
   0 -15   1 1.01469 1.00297   1
   0 -15   1 -0.5912  1.3232   1
   0  15   1 0.81435 1.02695   5
   0  15  -1 1.46288 1.33397   3
   0  15  -1 0.16653 1.43681   5
   0  15   1 3.13307 1.82709   3
   0  15   1 1.21747 1.23655   1
   0  15  -1 -3.3120  1.4753   3
  -1 -15  -1 5.22514 1.96487   1
   1 -15   1 2.13346 1.62653   5
   1 -15   1 4.92441 1.23824   1
   1 -15   1 3.64226 1.44458   1
   1  15   1 6.15115 2.04837   3
  -1  15  -1 7.28509 1.32257   3
   1  15   1 6.46234 1.66075   1
  -1  15  -1 4.03237 1.60745   3
   2 -15   1 195.073  18.007   1
  -2 -15  -1 210.844  18.465   1
   2 -15   1 180.188  18.084   1
   2  15   1 211.320  18.773   3
   2  15   1 203.390  18.177   1
   3 -15   1 253.157  24.870   1
  -3 -15  -1 276.395  24.645   4
  -3 -15  -1 281.826  25.392   1
   3  15   1 264.845  24.946   1
   3  15   1 302.270  25.753   3
  -4 -15  -1 50.8172  6.3496   6
   4 -15   1 43.6361  5.1166   1
  -4 -15  -1 32.6843  5.7996   1
   4  15   1 38.1834  5.5487   3
   4  15   1 36.7012  4.9436   1
  -5 -15  -1 47.4702  6.6887   1
   5 -15   1 41.7559  5.4509   1
  -5 -15  -1 45.6128  6.6512   3
  -5 -15  -1 49.2652  6.6134   6
   5 -15   1 41.8249  5.5485   2
   5  15   1 41.5129  5.9827   3
   5  15   1 47.2583  5.6023   1
  -6 -15  -1 56.4270  7.6933   3
   6 -15   1 71.5880  7.0834   2
  -6 -15  -1 71.2397  8.1412   6
   6 -15   1 53.7120  6.6209   1
   6  15   1 47.8572  6.4368   1
   6  15   1 37.7226  6.6757   3
   6  15   1 86.5214  9.6926   6
  -7 -15  -1 7.00205 4.49122   6
   7 -15   1 9.52219 3.36007   2
   7 -15   1 8.66565 3.17300   1
  -7 -15  -1 12.9971  4.3551   3
   7  15   1 7.48708 3.88445   3
   7  15   1 9.04773 3.00315   1
   8 -15   1 4.74073 3.35206   1
  -8 -15  -1 7.42624 4.82595   6
  -8 -15  -1 7.74600 4.61267   3
   8 -15   1 8.55395 3.61564   2
   8  15   1 6.75649 3.38337   1
   8  15   1 0.46746 4.29628   3
   9 -15   1 16.0519  4.2057   1
  -9 -15  -1 1.82273 4.92914   3
  -9 -15  -1 -1.4742  4.9143   6
   9  15   1 3.88500 3.77045   1
  10 -15   1 25.4096  5.7142   1
 -10 -15  -1 37.0471  7.3834   3
 -10 -15  -1 38.6620  6.6384   6
  10  15   1 32.0837  6.0337   1
  11 -15   1 -0.5812  4.0599   1
 -11 -15  -1 -1.4435  5.1123   3
 -11 -15  -1 1.57076 4.80670   6
  11  15   1 1.33225 4.58707   1
 -12 -15  -1 -3.6830  5.1269   3
  12 -15   1 1.95643 4.64180   1
 -12 -15  -1 -0.4426  4.2521   6
  13 -15   1 -0.1053  5.2553   1
 -13 -15  -1 7.42902 5.64058   3
  13 -16  -1 -2.7949  5.4525   1
 -13 -16   1 7.46935 6.76890   3
  13  16  -1 -1.5643  4.4355   2
 -13  16   1 -0.7742  3.3568   3
  12 -16  -1 8.36721 5.23142   1
 -12 -16   1 3.47118 5.60065   3
  12  16  -1 1.21937 3.98305   2
 -12  16   1 -0.2935  3.2407   3
  11 -16  -1 4.89337 4.82567   1
 -11 -16   1 -1.1664  5.6243   3
 -11  16   1 2.83064 3.43921   3
  11  16  -1 4.93165 3.86776   2
 -10 -16   1 2.75333 5.52040   3
  10 -16  -1 -5.4013  4.2643   2
  10 -16  -1 -1.7384  3.9674   1
  10  16  -1 2.40002 3.58845   2
 -10  16   1 3.07003 3.40489   3
   9 -16  -1 80.6626  9.0686   2
  -9 -16   1 73.0934 10.0358   3
   9 -16  -1 67.6936  8.6160   1
   9  16  -1 55.2122  8.9603   3
   9  16  -1 62.1412  8.2554   2
   9  16  -1 62.4987  8.5405   1
  -9  16   1 68.3078  8.0797   3
  -8 -16   1 5.29405 4.60831   3
   8 -16  -1 -1.2779  3.5219   2
   8 -16  -1 -2.9093  3.2259   1
   8  16  -1 4.73375 4.23615   3
  -8  16   1 -1.4825  3.0236   3
   8  16  -1 1.38941 3.48725   1
   8  16  -1 -0.8798  3.0671   2
   7 -16  -1 10.1857  3.6891   2
  -7 -16   1 4.49713 5.22534   6
   7 -16  -1 9.11714 3.33689   1
   7 -16  -1 3.18647 4.39650   3
  -7 -16   1 5.83220 4.23214   3
  -7  16   1 5.23601 3.40260   3
   7  16  -1 6.36490 2.98049   2
  -7  16   1 7.94324 3.05893   3
   7  16  -1 0.29913 3.48982   3
   7  16  -1 7.96471 3.18705   1
   6 -16  -1 4.53644 2.82104   1
   6 -16  -1 4.90911 4.17383   3
  -6 -16   1 2.89143 4.14298   3
   6 -16  -1 5.76578 3.38011   2
  -6  16   1 1.89585 2.63539   3
  -6  16   1 6.17751 3.31142   3
   6  16  -1 1.18184 3.20143   3
   6  16  -1 6.15129 2.86844   2
   6  16  -1 3.66843 2.65601   1
  -5 -16   1 111.811  13.132   3
  -5 -16   1 137.722  13.157   1
   5 -16  -1 124.001  12.320   1
   5 -16  -1 125.982  13.118   3
  -5  16   1 103.009  12.589   3
   5  16  -1 144.732  12.423   2
  -5  16   1 126.788  12.470   3
   5  16  -1 103.326  12.707   3
   5  16  -1 141.908  12.249   1
   4 -16  -1 216.184  19.156   1
  -4 -16   1 225.780  19.685   1
   4 -16  -1 190.943  19.870   3
   4  16  -1 221.538  19.028   1
  -4  16   1 210.564  19.503   3
   4  16  -1 189.324  19.687   3
  -4  16   1 188.661  19.541   3
   4  16  -1 193.408  19.056   2
  -3 -16   1 -1.1851  2.6186   1
   3 -16  -1 2.30267 3.33419   3
   3 -16  -1 5.79252 2.56732   1
   3  16  -1 2.21001 2.07086   1
  -3  16   1 -1.7280  3.0898   3
  -3  16   1 1.73010 2.39978   3
   3  16  -1 4.77174 2.81112   3
   2 -16  -1 289.627  26.493   3
   2 -16  -1 284.822  25.767   1
  -2 -16   1 296.509  25.873   1
  -2  16   1 280.814  26.377   3
  -2  16   1 266.399  26.272   3
   2  16  -1 282.725  26.310   3
   1 -16  -1 2.41460 1.73107   1
  -1 -16   1 -2.3651  1.5455   1
   1 -16  -1 3.71478 1.26515   5
  -1  16   1 0.15088 1.67976   3
   1  16  -1 1.44855 1.58828   3
  -1  16   1 -0.7140  1.2436   1
   0 -16  -1 95.7495  9.2152   1
   0 -16   1 97.3032  9.1293   1
   0 -16   1 92.5584  8.9838   1
   0  16  -1 101.271   9.333   3
   0  16   1 99.4638  9.1256   1
   0  16  -1 98.0972  9.2421   3
   0  16  -1 97.1309  9.1786   5
   0  16   1 101.462   9.578   3
   0  16   1 87.7305  8.8614   5
   1 -16   1 -1.1309  1.4131   1
  -1 -16  -1 -0.5548  1.7813   1
   1 -16   1 1.46163 1.66301   5
   1 -16   1 -0.7898  1.0047   1
   1  16   1 0.23609 1.36317   1
   1  16   1 -0.9147  1.9084   3
  -1  16  -1 -3.1774  1.5101   3
  -1  16  -1 1.57111 1.25378   3
   2 -16   1 411.545  37.004   1
   2 -16   1 441.338  36.941   1
  -2 -16  -1 423.658  37.306   1
   2  16   1 402.292  37.020   1
   2  16   1 380.904  37.998   3
  -3 -16  -1 15.6084  3.7039   1
  -3 -16  -1 15.5080  2.6156   4
   3 -16   1 9.16173 2.85742   1
   3  16   1 16.2638  2.9376   1
   3  16   1 22.2252  3.6362   3
  -4 -16  -1 2.72894 4.14124   6
   4 -16   1 9.70074 2.91952   1
  -4 -16  -1 9.02697 3.85101   1
   4  16   1 9.73831 2.72748   1
   4  16   1 8.85103 3.60491   3
  -5 -16  -1 9.03312 4.24391   6
  -5 -16  -1 7.40398 3.84171   3
  -5 -16  -1 4.97588 3.90816   1
   5 -16   1 2.52859 2.55427   1
   5  16   1 9.80930 3.54731   3
   5  16   1 5.97774 2.42529   1
   6 -16   1 8.08815 3.07925   2
  -6 -16  -1 6.17608 4.32353   6
  -6 -16  -1 1.03541 3.73176   3
   6 -16   1 12.4313  3.0601   1
   6  16   1 8.48745 2.82297   1
   6  16   1 16.1377  3.9376   3
   7 -16   1 377.452  30.928   1
   7 -16   1 343.641  30.732   2
  -7 -16  -1 317.966  32.106   3
  -7 -16  -1 320.734  32.045   6
   7  16   1 322.715  31.731   3
   7  16   1 321.022  30.767   1
   8 -16   1 -4.7954  3.0111   2
  -8 -16  -1 3.16126 4.86293   6
  -8 -16  -1 1.98310 4.41527   3
   8 -16   1 -3.0468  2.9013   1
   8  16   1 -1.4517  3.0263   1
   8  16   1 2.57885 4.55524   3
  -9 -16  -1 5.93295 5.29068   6
   9 -16   1 0.37667 3.65049   1
  -9 -16  -1 10.1564  5.2817   3
   9  16   1 8.87847 3.98575   1
 -10 -16  -1 9.54358 5.42190   3
  10 -16   1 -1.3576  3.7689   1
 -10 -16  -1 -2.0379  4.9175   6
  10  16   1 -1.6213  3.9909   1
  11 -16   1 -6.5019  3.7618   1
 -11 -16  -1 2.53418 4.97967   6
 -11 -16  -1 7.70681 5.52568   3
 -12 -16  -1 -0.4074  4.3069   6
 -12 -16  -1 0.13538 5.50643   3
  12 -16   1 -0.8914  4.4874   1
 -13 -16  -1 6.63442 5.80983   3
  13 -16   1 3.23869 5.43012   1
 -13 -17   1 2.58553 6.68014   3
  13 -17  -1 -3.6795  5.3429   1
 -13  17   1 4.39459 3.54345   3
 -12 -17   1 7.52308 6.04722   3
  12 -17  -1 2.11676 5.17021   1
  12  17  -1 -1.8510  3.8707   2
 -12  17   1 -5.3186  3.2162   3
  11 -17  -1 -4.0613  4.2948   1
 -11 -17   1 1.54820 5.67847   3
 -11  17   1 8.45513 3.64871   3
  11  17  -1 1.32672 3.70199   2
  10 -17  -1 7.01331 4.46003   1
 -10 -17   1 11.4492  6.0407   3
  10 -17  -1 4.47920 4.69078   2
  10  17  -1 1.15956 3.72683   2
 -10  17   1 3.76462 3.47374   3
  -9 -17   1 3.08295 5.00373   3
   9 -17  -1 -2.6706  3.7850   1
   9 -17  -1 4.04379 4.29643   2
   9  17  -1 -6.4891  4.7280   3
   9  17  -1 2.56732 3.41891   2
  -9  17   1 2.42416 3.28506   3
   8 -17  -1 1.34020 3.69320   2
   8 -17  -1 -1.9395  3.3508   1
  -8 -17   1 2.16286 4.77772   3
   8  17  -1 -0.4483  3.3962   1
   8  17  -1 3.07641 3.22190   2
   8  17  -1 9.11473 4.32555   3
  -8  17   1 2.25408 2.99624   3
   7 -17  -1 3.10292 3.02317   1
  -7 -17   1 4.41981 4.30398   3
   7 -17  -1 0.37512 3.20492   2
  -7  17   1 3.21696 3.31019   3
  -7  17   1 1.28288 2.75916   3
   7  17  -1 -1.7402  2.7299   1
   7  17  -1 3.26424 3.65643   3
   7  17  -1 -0.6836  2.6876   2
  -6 -17   1 21.3507  4.8512   3
   6 -17  -1 6.51388 3.41775   2
   6 -17  -1 13.3951  4.4757   3
   6 -17  -1 13.2111  3.4178   1
  -6  17   1 7.71743 2.86444   3
   6  17  -1 10.9315  3.6875   3
  -6  17   1 6.65264 3.41111   3
   6  17  -1 14.4236  3.2882   1
   6  17  -1 9.05274 2.97252   2
   5 -17  -1 88.3843  9.6784   1
   5 -17  -1 89.6333 10.5656   3
  -5 -17   1 98.3480 10.6271   3
  -5 -17   1 83.7739 10.2883   1
   5  17  -1 80.2121 10.0348   3
  -5  17   1 97.8339 10.0777   3
   5  17  -1 91.1171  9.5891   1
   5  17  -1 90.7186  9.6327   2
  -5  17   1 110.223   9.801   3
  -4 -17   1 115.983  12.664   1
   4 -17  -1 128.018  13.087   3
   4 -17  -1 119.364  12.342   1
   4  17  -1 129.679  12.384   2
  -4  17   1 119.890  12.456   3
   4  17  -1 114.830  12.195   1
   4  17  -1 136.826  12.916   3
  -4  17   1 141.229  12.818   3
  -3 -17   1 64.9931  8.4254   1
   3 -17  -1 77.1117  8.3613   1
   3 -17  -1 77.8383  9.1190   3
  -3  17   1 94.7681  8.8896   3
  -3  17   1 84.4725  8.5009   3
   3  17  -1 89.2398  8.8712   3
   3  17  -1 70.2572  8.0153   1
   2 -17  -1 22.7673  3.8991   1
   2 -17  -1 30.6960  4.4127   3
  -2 -17   1 37.5882  4.3836   1
  -2  17   1 38.8320  4.5976   3
   2  17  -1 30.8334  4.0171   3
  -2  17   1 26.5330  4.3669   3
  -1 -17   1 -0.9541  1.6818   1
   1 -17  -1 0.39873 1.76385   1
   1 -17  -1 0.86110 1.28257   5
  -1  17   1 1.53318 1.49070   1
  -1  17   1 0.30613 1.81739   3
   1  17  -1 2.01708 1.73414   3
   0 -17   1 9.90082 1.99511   1
   0 -17   1 9.33449 1.60585   1
   0 -17  -1 7.69728 2.14399   1
   0  17  -1 9.95351 1.85141   3
   0  17   1 7.89484 1.83332   1
   0  17   1 6.87489 2.21169   3
   0  17   1 5.52973 1.47044   5
   0  17  -1 6.26551 2.07432   3
   0  17  -1 8.25537 1.95896   5
   1 -17   1 1.18673 1.84951   5
   1 -17   1 -1.2262  1.5130   1
  -1 -17  -1 -1.5922  1.9147   1
   1 -17   1 -0.3181  1.1181   1
   1  17   1 0.71384 1.53955   1
  -1  17  -1 0.86663 1.36653   3
  -1  17  -1 1.18001 1.75977   3
   1  17   1 -1.5282  2.0465   3
   2 -17   1 220.168  18.460   1
   2 -17   1 165.725  18.481   1
  -2 -17  -1 175.742  18.736   1
   2  17   1 199.711  18.564   1
   2  17   1 216.119  19.301   3
  -2  17  -1 228.310  18.650   3
   3 -17   1 69.4295  7.4774   1
  -3 -17  -1 71.5185  7.0360   4
  -3 -17  -1 75.7733  8.1281   1
   3 -17   1 65.4060  7.1299   1
   3  17   1 78.8103  8.3371   3
   3  17   1 66.1767  7.5032   1
   4 -17   1 290.125  24.581   1
  -4 -17  -1 274.539  25.126   1
   4  17   1 237.641  24.446   1
   4  17   1 272.498  25.386   3
  -5 -17  -1 13.5731  4.4531   6
  -5 -17  -1 17.6418  4.6628   3
   5 -17   1 23.3786  3.6948   1
  -5 -17  -1 14.4507  4.6205   1
   5  17   1 16.0042  3.3088   1
   5  17   1 20.9280  4.1645   3
  -6 -17  -1 53.7215  7.4954   3
  -6 -17  -1 69.4986  8.2460   6
   6 -17   1 53.4409  6.4563   1
   6 -17   1 48.5334  6.4977   2
   6  17   1 47.4456  6.4012   1
   6  17   1 69.6704  7.6264   3
  -7 -17  -1 13.0638  4.5712   3
   7 -17   1 4.17883 3.00701   1
   7 -17   1 15.7486  3.5397   2
   7  17   1 7.69653 2.99632   1
   7  17   1 11.4725  4.2823   3
  -8 -17  -1 0.94904 4.46965   3
   8 -17   1 4.23287 3.44328   1
   8 -17   1 6.01071 3.67409   2
  -8 -17  -1 3.97619 5.03133   6
   8  17   1 2.18129 3.25825   1
   8  17   1 3.09022 4.71126   3
   9 -17   1 11.5174  4.4574   1
  -9 -17  -1 19.2530  6.0281   6
  -9 -17  -1 4.62750 5.14746   3
   9  17   1 17.6059  4.6530   1
  10 -17   1 29.5833  5.3012   1
 -10 -17  -1 13.0689  5.9839   6
 -10 -17  -1 17.4826  6.2041   3
  10  17   1 12.1637  4.8773   1
 -11 -17  -1 0.85346 5.23295   3
 -11 -17  -1 3.45710 4.98357   6
  11 -17   1 -3.0067  4.1193   1
  12 -17   1 -2.3749  4.5467   1
 -12 -17  -1 -3.9561  5.4189   3
 -12 -17  -1 3.97881 4.75195   6
 -13 -17  -1 10.7494  6.4878   3
  13 -17   1 19.7848  6.2946   1
 -13 -18   1 4.78768 6.86032   3
  13 -18  -1 5.71248 6.04825   1
 -13  18   1 0.14918 3.32781   3
 -12 -18   1 17.0122  6.8146   3
  12 -18  -1 9.27741 5.44172   1
 -12  18   1 11.3811  3.9360   3
  11 -18  -1 0.86045 4.61651   1
 -11 -18   1 5.34136 5.80575   3
  11  18  -1 4.38412 4.00547   2
 -11  18   1 -3.1821  3.1809   3
  10 -18  -1 11.5912  4.9903   2
 -10 -18   1 5.85700 5.78090   3
  10 -18  -1 9.45058 4.84545   1
  10  18  -1 11.7549  5.8689   3
  10  18  -1 7.02211 4.10318   2
 -10  18   1 9.43024 3.62689   3
  -9 -18   1 4.14259 4.99418   3
   9 -18  -1 3.99954 4.34766   2
   9 -18  -1 -9.1515  3.4193   1
   9  18  -1 -0.0153  3.2884   2
   9  18  -1 2.32948 5.03842   3
  -9  18   1 1.86263 3.15512   3
   8 -18  -1 -1.8196  3.6361   2
   8 -18  -1 -4.2777  3.2018   1
  -8 -18   1 -6.7914  4.5067   3
  -8  18   1 1.62528 2.99498   3
   8  18  -1 3.37556 3.27915   2
   8  18  -1 0.13463 3.64325   1
   8  18  -1 4.70844 4.25914   3
  -7 -18   1 5.86090 4.30393   3
   7 -18  -1 -1.9427  2.9079   1
   7 -18  -1 4.40939 3.57178   2
   7  18  -1 0.16706 2.89968   2
  -7  18   1 0.96877 3.32629   3
   7  18  -1 4.23512 3.71873   3
  -7  18   1 3.17484 2.67357   3
   7  18  -1 0.02211 2.84866   1
  -6 -18   1 40.4262  6.6192   1
   6 -18  -1 40.2659  6.3033   3
   6 -18  -1 39.2369  5.8328   2
   6 -18  -1 38.6323  5.4782   1
  -6 -18   1 34.5615  6.5267   3
   6  18  -1 45.4411  5.6937   1
  -6  18   1 43.3159  5.4477   3
  -6  18   1 37.5390  5.5161   3
   6  18  -1 40.9373  5.9397   3
   6  18  -1 45.2497  5.6397   2
  -5 -18   1 9.47746 3.86300   1
   5 -18  -1 10.0155  3.2210   1
   5 -18  -1 10.8193  4.1073   3
  -5  18   1 11.4528  3.0858   3
   5  18  -1 8.42136 2.86187   1
   5  18  -1 8.48550 3.13860   2
   5  18  -1 7.55594 3.64426   3
  -5  18   1 9.46908 3.59504   3
  -4 -18   1 3.39562 3.25621   1
   4 -18  -1 8.49096 3.99796   3
   4 -18  -1 1.20020 2.91742   1
   4  18  -1 0.52026 3.21723   3
   4  18  -1 2.19913 2.41069   1
  -4  18   1 1.77184 3.57649   3
  -4  18   1 2.99142 2.76217   3
   3 -18  -1 431.619  38.635   3
   3 -18  -1 415.748  37.608   1
  -3 -18   1 437.144  37.827   1
   3  18  -1 406.527  38.431   3
  -3  18   1 394.918  38.272   3
   3  18  -1 420.147  37.431   1
  -3  18   1 404.159  38.423   3
  -2 -18   1 2.77223 2.55170   1
   2 -18  -1 0.05923 2.28906   1
  -2  18   1 3.90957 3.14167   3
   2  18  -1 -2.3604  2.4642   3
  -2  18   1 1.45825 2.37432   3
   2  18  -1 -0.2659  1.1483   1
   1 -18  -1 109.383   9.913   5
  -1 -18   1 107.867  10.279   1
   1 -18  -1 111.841  10.375   1
  -1  18   1 85.3457 10.0303   1
  -1  18   1 102.521  10.540   3
   1  18  -1 109.667  10.338   5
   1  18  -1 117.688  10.566   3
   0 -18   1 -1.1860  1.1335   1
   0 -18  -1 0.39745 1.94189   1
   0 -18   1 0.96427 1.76439   1
   0  18  -1 -0.6961  1.6373   3
   0  18   1 1.31823 1.50524   1
   0  18  -1 2.55150 1.98286   3
   0  18  -1 0.39432 1.76242   5
   0  18   1 0.56291 1.29742   5
   0  18   1 1.31149 2.13890   3
   1 -18   1 75.5932  7.3129   1
   1 -18   1 73.1201  7.4393   1
  -1 -18  -1 63.2329  7.6307   1
   1 -18   1 75.4918  7.5848   5
  -1  18  -1 70.8725  7.4686   3
  -1  18  -1 85.2775  7.6089   3
   1  18   1 84.5610  8.2007   3
   1  18   1 75.7379  7.5661   1
  -2 -18  -1 44.4647  5.9430   1
   2 -18   1 42.9431  5.6671   1
   2 -18   1 57.4283  5.4703   1
   2 -18   1 44.6996  5.7804   5
   2  18   1 56.0042  6.6307   3
  -2  18  -1 54.6030  5.3197   3
   2  18   1 53.2369  5.6880   1
  -3 -18  -1 129.912  12.336   4
   3 -18   1 137.581  12.522   1
   3 -18   1 117.750  12.607   1
  -3 -18  -1 134.282  13.105   1
   3  18   1 130.165  13.413   3
   3  18   1 147.148  12.852   1
  -4 -18  -1 312.912  26.694   1
  -4 -18  -1 280.363  25.528   4
   4 -18   1 265.636  25.994   1
   4  18   1 270.512  26.886   3
   4  18   1 303.495  26.132   1
  -5 -18  -1 15.7670  4.4106   1
  -5 -18  -1 5.80950 4.05333   3
   5 -18   1 14.7877  3.3423   1
  -5 -18  -1 13.0526  4.5163   6
   5  18   1 15.5452  4.0419   3
   5  18   1 23.0594  3.3872   1
   6 -18   1 220.675  20.488   2
  -6 -18  -1 210.324  21.591   6
  -6 -18  -1 209.674  21.505   3
   6 -18   1 229.648  20.494   1
   6  18   1 229.420  20.426   1
   6  18   1 202.715  21.130   3
   7 -18   1 2.03833 3.29406   2
  -7 -18  -1 9.17423 5.05584   6
  -7 -18  -1 1.00825 3.90822   3
   7 -18   1 1.21354 2.89691   1
   7  18   1 0.72977 3.80039   3
   7  18   1 -1.3238  2.5539   1
   8 -18   1 50.0603  7.0174   2
  -8 -18  -1 65.2197  8.7173   3
  -8 -18  -1 55.4548  8.3980   6
   8 -18   1 59.1026  7.2587   1
   8  18   1 45.0086  7.7367   3
   8  18   1 52.0822  7.2436   1
   9 -18   1 4.32980 3.81139   1
  -9 -18  -1 -1.3538  4.7965   3
   9  18   1 9.65230 4.25603   1
 -10 -18  -1 48.7977  8.6757   3
  10 -18   1 53.9467  7.5503   1
  10  18   1 49.3505  7.6920   1
 -11 -18  -1 -0.9744  5.4045   3
  11 -18   1 2.76753 4.38793   1
 -12 -18  -1 -5.1474  4.6644   6
 -12 -18  -1 10.0193  5.9038   3
  12 -18   1 -0.7873  4.6431   1
 -13 -18  -1 16.2516  6.5878   3
  13 -18   1 18.3965  6.4518   1
 -13 -19   1 14.2604  7.2112   3
  13 -19  -1 19.5065  6.6728   1
 -13  19   1 14.5095  3.9297   3
  12 -19  -1 11.9523  5.6218   1
 -12 -19   1 1.09245 6.08055   3
 -12  19   1 6.46363 3.55709   3
  11 -19  -1 3.99892 4.64556   1
 -11 -19   1 -0.8129  5.5609   3
 -11  19   1 -0.8339  3.2188   3
  11  19  -1 -0.4305  3.7750   2
 -10 -19   1 -3.2723  5.2010   3
  10 -19  -1 -3.4933  4.3492   2
  10 -19  -1 -6.2853  3.7992   1
 -10  19   1 4.90640 3.33619   3
  10  19  -1 -1.0271  5.4783   3
  10  19  -1 1.81135 3.70515   2
  -9 -19   1 4.84082 5.17738   3
   9 -19  -1 5.23889 3.95544   1
   9 -19  -1 -1.4676  4.0327   2
  -9  19   1 -1.1723  3.0579   3
   9  19  -1 -6.5400  4.6357   3
   9  19  -1 0.14213 3.43889   2
   8 -19  -1 -3.3135  3.2522   1
  -8 -19   1 -2.5201  4.9466   3
   8 -19  -1 1.76219 3.89154   2
   8  19  -1 1.82069 3.18198   2
   8  19  -1 0.92718 4.24487   3
   8  19  -1 -4.8602  3.5266   1
  -8  19   1 0.59846 2.80820   3
  -7 -19   1 -6.6172  3.8770   3
   7 -19  -1 -4.5474  3.1157   2
   7 -19  -1 -0.5024  3.0107   1
   7  19  -1 -1.3889  2.7766   2
  -7  19   1 -3.9938  3.2345   3
  -7  19   1 3.38491 2.68831   3
   7  19  -1 6.40509 3.80389   3
   7  19  -1 -3.2088  3.1970   1
   6 -19  -1 37.4610  5.3957   1
   6 -19  -1 39.7103  6.2800   3
  -6 -19   1 41.3184  6.5795   1
   6 -19  -1 45.4363  5.8712   2
  -6 -19   1 32.5057  6.2429   3
  -6  19   1 39.1825  5.0917   3
   6  19  -1 42.5773  5.7719   3
   6  19  -1 33.4451  5.1542   2
  -6  19   1 40.8818  5.3545   3
   6  19  -1 30.4226  5.1203   1
   5 -19  -1 3.42462 2.77403   1
   5 -19  -1 4.73645 3.84061   3
  -5 -19   1 -1.2974  3.3723   1
  -5  19   1 0.44484 2.58127   3
  -5  19   1 4.34965 3.38347   3
   5  19  -1 2.17543 2.69978   2
   5  19  -1 4.09678 3.32468   3
   5  19  -1 0.88549 2.46189   1
  -4 -19   1 7.28222 3.61972   1
   4 -19  -1 13.7221  4.2522   3
   4 -19  -1 8.08735 3.19505   1
  -4  19   1 9.96532 3.02421   3
  -4  19   1 8.46694 3.80761   3
   4  19  -1 8.28127 2.69852   1
   4  19  -1 12.9833  3.7434   3
   3 -19  -1 129.529  13.769   3
   3 -19  -1 117.680  12.947   1
   3  19  -1 136.231  12.768   1
   3  19  -1 142.227  13.476   3
  -3  19   1 133.301  13.539   3
  -3  19   1 139.982  13.255   3
  -2 -19   1 27.1801  4.0264   1
   2 -19  -1 19.0233  3.7440   1
  -2  19   1 24.6172  3.8634   3
  -2  19   1 25.9413  4.6338   3
   2  19  -1 21.1292  3.8247   3
   1 -19  -1 7.60651 2.52482   1
   1 -19  -1 8.39173 1.78740   5
  -1 -19   1 3.30203 2.32947   1
   1  19  -1 6.53459 2.39367   3
   1  19  -1 4.81442 2.51356   5
  -1  19   1 1.66542 1.72064   1
  -1  19   1 1.12818 1.80750   3
  -1  19   1 7.52726 2.64789   3
   0 -19   1 -0.7851  1.8912   1
   0 -19  -1 3.58078 2.31497   1
   0 -19   1 2.62061 1.46308   1
   0  19  -1 3.64263 2.07268   5
   0  19  -1 1.53608 2.30865   3
   0  19   1 3.45483 1.58537   5
   0  19  -1 2.77976 1.98833   3
   0  19   1 -1.2379  1.6037   1
   0  19   1 3.93386 2.46602   3
   1 -19   1 29.3002  4.2674   1
   1 -19   1 31.3734  4.4222   5
  -1 -19  -1 33.3771  4.7007   1
   1 -19   1 39.0722  4.2549   1
  -1  19  -1 40.1146  4.6884   3
  -1  19  -1 41.2037  4.5107   3
   1  19   1 31.1089  4.7228   3
   1  19   1 39.5003  4.5672   1
   2 -19   1 256.528  24.131   1
   2 -19   1 269.596  24.524   5
  -2 -19  -1 255.866  24.559   1
   2 -19   1 275.951  24.276   1
   2  19   1 265.875  24.268   1
  -2  19  -1 268.583  24.464   3
   2  19   1 270.055  25.121   3
   3 -19   1 178.926  16.133   1
  -3 -19  -1 166.898  15.926   4
   3 -19   1 181.316  16.315   1
  -3 -19  -1 170.221  16.728   1
   3  19   1 181.436  16.980   3
   3  19   1 164.191  16.297   1
   4 -19   1 363.690  33.087   1
  -4 -19  -1 366.490  33.628   1
   4  19   1 393.458  34.151   3
   4  19   1 338.898  33.087   1
   5 -19   1 131.308  12.297   1
  -5 -19  -1 139.298  13.639   6
  -5 -19  -1 126.378  13.114   1
   5  19   1 128.125  13.002   3
   5  19   1 110.523  12.222   1
  -6 -19  -1 14.8573  4.7681   1
  -6 -19  -1 13.7201  4.4145   3
   6 -19   1 9.67045 3.00742   1
   6 -19   1 19.9193  3.6201   2
  -6 -19  -1 27.3847  5.2783   6
   6  19   1 7.78030 2.86391   1
   6  19   1 0.78612 3.54560   3
   7 -19   1 4.32029 3.04965   1
   7 -19   1 0.05337 3.17732   2
  -7 -19  -1 1.50763 4.14785   3
  -7 -19  -1 5.17323 4.99348   6
   7  19   1 5.26976 4.12767   3
   7  19   1 3.30501 2.93258   1
  -8 -19  -1 8.93925 5.15753   3
   8 -19   1 -0.6321  3.4977   2
   8 -19   1 -1.7718  3.0811   1
  -8 -19  -1 2.32029 5.28057   6
   8  19   1 4.90935 3.45581   1
   8  19   1 2.42430 4.75488   3
   9 -19   1 18.1376  4.8867   1
  -9 -19  -1 20.8535  6.2001   3
   9  19   1 18.9890  4.9482   1
 -10 -19  -1 17.3481  6.0660   3
  10 -19   1 8.53493 4.43780   1
  11 -19   1 6.30069 4.51245   1
 -11 -19  -1 6.16041 5.85223   3
 -12 -19  -1 11.3316  6.0666   3
  12 -19   1 0.28249 4.77758   1
  13 -19   1 1.48724 5.54448   1
 -13 -19  -1 8.92925 6.49536   3
 -13 -19  -1 1.03216 4.71166   6
 -13 -20   1 11.9033  7.0538   3
  13 -20  -1 19.7814  6.6303   1
 -12 -20   1 -5.6955  5.9729   3
  12 -20  -1 -0.9935  4.7715   1
 -12  20   1 3.29491 3.33561   3
  11 -20  -1 1.78529 4.76655   1
 -11 -20   1 2.52842 5.86805   3
 -11  20   1 8.49248 3.52841   3
  10 -20  -1 -4.3556  4.7216   2
 -10 -20   1 6.20241 5.68143   3
  10 -20  -1 2.69517 4.23646   1
  10  20  -1 4.93820 3.97694   2
  10  20  -1 0.17470 5.63877   3
 -10  20   1 -3.1850  2.9964   3
  -9 -20   1 9.03882 5.91234   3
   9 -20  -1 13.5724  4.4548   1
   9 -20  -1 9.97758 4.76679   2
   9  20  -1 10.7140  4.1041   2
  -9  20   1 12.7371  3.6786   3
   9  20  -1 9.69082 5.54725   3
  -8 -20   1 -1.5018  4.6803   3
   8 -20  -1 6.58004 3.71340   1
   8 -20  -1 3.49370 4.05501   2
   8  20  -1 -0.5523  3.2436   2
  -8  20   1 6.65320 3.17404   3
   8  20  -1 2.27377 3.71686   1
   8  20  -1 2.07781 4.29389   3
   7 -20  -1 34.7991  5.3644   1
   7 -20  -1 30.7386  5.4521   2
  -7 -20   1 32.5440  6.5517   3
   7  20  -1 41.5551  5.4507   2
   7  20  -1 29.5867  5.1402   1
  -7  20   1 25.5886  5.0306   3
   7  20  -1 38.4200  5.7994   3
  -7  20   1 32.7705  4.7280   3
  -6 -20   1 5.40212 3.97704   3
   6 -20  -1 1.05267 2.75377   1
   6 -20  -1 4.65637 4.24431   3
  -6 -20   1 1.99577 3.84951   1
  -6  20   1 -0.5344  3.1146   3
  -6  20   1 1.56004 2.46167   3
   6  20  -1 2.59151 3.45128   3
   6  20  -1 3.12625 2.77992   2
   6  20  -1 4.81209 2.83362   1
  -5 -20   1 8.47185 3.58877   1
   5 -20  -1 10.5398  4.1668   3
   5 -20  -1 5.99719 3.00438   1
   5  20  -1 6.37505 3.40834   3
   5  20  -1 7.43755 2.81611   1
  -5  20   1 5.71692 2.62685   3
  -5  20   1 2.84024 3.33322   3
  -4 -20   1 105.964  11.522   1
   4 -20  -1 122.184  11.190   1
   4 -20  -1 115.669  12.011   3
  -4  20   1 105.554  11.107   3
   4  20  -1 101.963  11.504   3
  -4  20   1 103.346  11.495   3
   4  20  -1 116.667  11.009   1
  -3 -20   1 -3.1174  2.8771   1
   3 -20  -1 -0.1374  2.8202   1
   3 -20  -1 -2.2594  3.5099   3
   3  20  -1 4.51814 3.26684   3
   3  20  -1 0.54330 2.25998   1
  -3  20   1 3.30326 2.85926   3
  -3  20   1 -4.3430  3.6172   3
   2 -20  -1 21.5664  3.2945   5
   2 -20  -1 21.6405  3.8554   1
  -2  20   1 22.6510  3.8331   3
   2  20  -1 21.3463  3.8219   3
  -2  20   1 17.9092  4.3877   3
  -1 -20   1 -1.5118  2.4309   1
   1 -20  -1 1.31354 1.86098   5
   1 -20  -1 0.57451 2.47373   1
  -1  20   1 5.21106 2.43997   3
  -1  20   1 -1.0243  2.6203   3
   1  20  -1 1.88984 2.51964   5
   1  20  -1 -0.8175  2.4904   3
  -1  20   1 -0.0131  1.5759   1
   0 -20   1 234.676  20.814   1
   0 -20  -1 212.172  20.879   1
   0 -20   1 210.640  20.574   1
   0  20  -1 250.335  21.245   3
   0  20  -1 232.998  21.154   3
   0  20   1 228.348  20.569   5
   0  20   1 235.181  21.430   3
   0  20  -1 219.157  20.828   5
   0  20   1 215.875  20.679   1
   1 -20   1 7.13659 2.57339   1
  -1 -20  -1 8.31598 2.91550   1
   1 -20   1 1.90486 2.57339   5
   1 -20   1 8.13731 1.98571   1
  -1  20  -1 6.31713 2.72446   3
  -1  20  -1 8.57234 2.31207   3
   1  20   1 9.23349 2.48664   1
   1  20   1 6.79649 3.16035   3
   2 -20   1 324.081  29.999   5
   2 -20   1 314.038  29.714   1
   2 -20   1 334.244  29.638   1
  -2 -20  -1 336.204  30.033   1
  -2  20  -1 335.561  30.070   3
   2  20   1 328.750  29.712   1
   2  20   1 320.021  30.639   3
  -3 -20  -1 93.6882 10.1725   4
   3 -20   1 106.996  10.556   1
  -3 -20  -1 128.219  11.207   1
   3 -20   1 111.646  10.363   1
   3  20   1 109.229  10.649   1
   3  20   1 98.6609 11.2913   3
  -4 -20  -1 189.807  17.886   1
   4 -20   1 169.115  17.220   1
   4  20   1 211.383  17.382   1
   4  20   1 167.556  17.970   3
  -5 -20  -1 293.535  25.962   1
  -5 -20  -1 251.912  26.405   6
   5 -20   1 283.115  25.220   1
   5  20   1 263.160  26.047   3
   5  20   1 275.862  25.242   1
  -6 -20  -1 0.97603 3.86297   3
   6 -20   1 3.07160 2.73350   1
  -6 -20  -1 2.08485 4.11178   1
   6 -20   1 5.50764 3.06193   2
  -6 -20  -1 0.62588 4.56115   6
   6  20   1 -0.5050  2.3988   1
   6  20   1 1.05156 3.50383   3
   7 -20   1 84.0066  9.2250   2
  -7 -20  -1 87.6364 10.4218   6
  -7 -20  -1 89.2973 10.0668   3
   7 -20   1 73.7550  8.8380   1
   7  20   1 76.2100  9.9366   3
   7  20   1 75.8372  8.9574   1
   8 -20   1 1.94523 3.22677   1
  -8 -20  -1 0.84880 4.70431   3
   8 -20   1 6.60745 3.78561   2
   8  20   1 5.21263 4.89321   3
   8  20   1 -1.3625  3.2791   1
  -9 -20  -1 90.7625 10.7611   3
   9 -20   1 80.0632  9.5224   1
   9  20   1 72.4585  9.7616   1
 -10 -20  -1 12.6760  5.7478   3
  10 -20   1 3.00681 4.10499   1
  11 -20   1 2.21991 4.40957   1
 -11 -20  -1 -3.0367  5.2904   3
 -12 -20  -1 -2.4017  5.4654   3
  12 -20   1 5.07900 4.86555   1
 -13 -20  -1 2.51009 6.23634   3
 -13 -21   1 11.5108  6.8378   3
  13 -21  -1 -0.2419  5.7946   1
  12 -21  -1 22.3398  6.2448   1
 -12 -21   1 8.96713 6.74199   3
 -12  21   1 15.0640  3.8220   3
 -11 -21   1 8.52522 6.28212   3
  11 -21  -1 4.04568 4.77030   1
 -11  21   1 1.17781 3.11849   3
  10 -21  -1 7.59544 5.15646   2
 -10 -21   1 16.5313  6.4588   3
  10 -21  -1 15.3093  5.0682   1
  10  21  -1 25.0267  6.2970   3
 -10  21   1 14.7202  3.8652   3
   9 -21  -1 -3.6430  4.2750   2
   9 -21  -1 -1.2261  3.8014   1
  -9 -21   1 7.08195 5.82842   3
   9  21  -1 1.38107 5.20780   3
  -9  21   1 0.76518 3.10822   3
  -8 -21   1 19.0117  5.9477   3
   8 -21  -1 35.2928  5.2669   1
   8 -21  -1 18.5614  5.3946   2
  -8  21   1 23.5566  4.2585   3
   8  21  -1 26.6419  5.6518   3
   7 -21  -1 30.6191  5.3406   1
   7 -21  -1 39.1936  5.6132   2
  -7 -21   1 19.3479  6.1467   3
  -7  21   1 38.6064  5.2648   3
  -7  21   1 36.3951  4.8330   3
   7  21  -1 32.0604  5.1442   1
   7  21  -1 24.1232  5.3908   3
  -6 -21   1 2.87988 3.91047   1
   6 -21  -1 4.74175 2.98859   1
   6 -21  -1 3.55882 4.33293   3
  -6 -21   1 8.02725 4.03106   3
  -6  21   1 0.15954 3.13692   3
  -6  21   1 1.93011 2.58435   3
   6  21  -1 0.59850 2.72658   1
   6  21  -1 6.62019 3.60452   3
  -5 -21   1 81.9676  9.3502   1
   5 -21  -1 91.2245  8.9060   1
   5 -21  -1 94.8063  9.8059   3
  -5  21   1 72.0954  8.5211   3
  -5  21   1 83.1351  8.9746   3
   5  21  -1 74.1914  8.6502   1
   5  21  -1 76.7213  9.0257   3
  -4 -21   1 177.952  16.326   1
   4 -21  -1 157.109  16.662   3
   4 -21  -1 162.961  15.872   1
   4  21  -1 163.516  16.363   3
   4  21  -1 161.501  15.716   1
  -4  21   1 174.742  16.308   3
  -4  21   1 163.001  16.009   3
  -3 -21   1 16.4987  3.8629   1
   3 -21  -1 20.9192  3.6855   1
   3 -21  -1 19.4689  4.2957   3
   3  21  -1 13.8722  3.0325   1
  -3  21   1 18.1423  3.5419   3
  -3  21   1 11.3142  4.2089   3
   3  21  -1 15.8863  3.7651   3
   2 -21  -1 2.77946 2.29473   5
   2 -21  -1 3.12163 2.87029   1
  -2 -21   1 3.87132 3.02185   1
   2  21  -1 4.81594 2.98044   3
  -2  21   1 5.34848 3.73050   3
  -2  21   1 4.02559 2.90588   3
  -1 -21   1 2.17012 2.71459   1
   1 -21  -1 -1.8285  2.5710   1
   1 -21  -1 4.57779 2.14698   5
  -1  21   1 1.44892 1.67954   1
   1  21  -1 -2.4122  2.6448   3
  -1  21   1 -0.2618  2.9607   3
  -1  21   1 0.15575 2.82291   3
   1  21  -1 -1.5338  2.5214   5
   0 -21  -1 -0.5107  2.6113   1
   0 -21   1 0.31775 2.41104   1
   0 -21   1 6.43725 1.98724   1
   0  21  -1 5.04500 2.91589   3
   0  21   1 3.95327 2.01236   5
   0  21   1 5.74404 3.11632   3
   0  21  -1 6.95995 2.65655   5
   0  21  -1 11.4050  2.6283   3
   0  21   1 5.75679 2.41628   1
   1 -21   1 6.70000 2.66223   1
   1 -21   1 8.38331 2.15739   1
  -1 -21  -1 5.61086 3.02404   1
   1 -21   1 6.23793 2.82112   5
   1  21   1 4.77480 2.45411   1
  -1  21  -1 8.18882 2.43944   3
   1  21   1 6.60629 3.32446   3
  -1  21  -1 12.4751  3.0056   3
   2 -21   1 100.860   9.554   1
   2 -21   1 91.3868  9.8568   5
  -2 -21  -1 89.3951 10.0836   1
   2 -21   1 82.4009  9.6815   1
   2  21   1 102.417  10.467   3
  -2  21  -1 112.999   9.566   3
   2  21   1 95.8819  9.7256   1
   3 -21   1 354.035  34.503   1
  -3 -21  -1 383.594  35.028   1
   3 -21   1 410.080  34.682   1
  -3 -21  -1 398.233  34.329   4
   3  21   1 368.216  34.671   1
   3  21   1 379.701  35.617   3
  -4 -21  -1 301.798  30.075   1
   4 -21   1 340.996  29.668   1
   4  21   1 350.237  30.697   3
   4  21   1 307.613  29.637   1
  -5 -21  -1 160.573  14.918   6
   5 -21   1 141.269  13.504   1
  -5 -21  -1 132.513  14.206   1
   5  21   1 133.358  13.449   1
   5  21   1 134.706  14.248   3
  -6 -21  -1 13.9562  5.2238   6
   6 -21   1 16.0062  3.4914   1
  -6 -21  -1 14.3543  4.8796   1
  -6 -21  -1 14.1547  4.4552   3
   6  21   1 9.92661 3.32135   1
   6  21   1 17.4498  4.4065   3
  -7 -21  -1 6.27309 4.39157   3
   7 -21   1 6.51634 3.25813   1
   7 -21   1 0.35930 3.37538   2
   7  21   1 7.16255 4.36630   3
   7  21   1 4.03642 3.09080   1
   8 -21   1 -0.3604  3.7525   2
  -8 -21  -1 3.70264 4.88699   3
   8 -21   1 8.55399 3.80323   1
   8  21   1 2.65464 4.87425   3
   8  21   1 7.70747 3.74835   1
   9 -21   1 19.1484  4.9801   1
  -9 -21  -1 25.6056  6.4149   3
   9  21   1 26.5536  5.5246   1
  10 -21   1 1.57531 4.07899   1
 -10 -21  -1 13.5638  5.7863   3
  11 -21   1 3.15400 4.47188   1
 -11 -21  -1 1.29198 5.64532   3
  12 -21   1 -5.1823  4.3922   1
 -12 -21  -1 2.46369 5.74420   3
 -13 -22   1 9.36733 7.07213   3
  13 -22  -1 -1.0103  5.9831   1
  12 -22  -1 63.2969  9.3758   1
 -12 -22   1 56.1186 10.4530   3
 -11 -22   1 -3.9810  5.7045   3
  11 -22  -1 -3.6705  4.4162   1
 -11  22   1 0.65266 3.08309   3
 -10 -22   1 188.146  20.248   3
  10 -22  -1 183.310  18.915   1
  10 -22  -1 186.248  19.348   2
 -10  22   1 188.148  18.291   3
  10  22  -1 198.297  19.895   3
   9 -22  -1 0.08227 4.01268   1
  -9 -22   1 -0.2730  5.4088   3
   9 -22  -1 -2.8430  4.3855   2
   9  22  -1 -2.1882  5.1184   3
  -9  22   1 6.58067 3.19795   3
   8 -22  -1 132.157  14.670   2
  -8 -22   1 144.216  15.565   3
   8 -22  -1 139.023  14.265   1
   8  22  -1 138.853  14.885   3
  -8  22   1 141.659  13.933   3
  -7 -22   1 -1.9006  4.2604   3
   7 -22  -1 9.45757 3.56980   1
   7 -22  -1 4.18362 3.86212   2
  -7  22   1 6.46723 2.88934   3
   7  22  -1 0.72983 3.83556   3
   7  22  -1 2.69293 3.36700   1
  -7  22   1 1.65808 3.49092   3
  -6 -22   1 -1.9591  3.6955   1
  -6 -22   1 5.88603 4.25177   3
   6 -22  -1 3.69039 3.02848   1
   6  22  -1 2.21361 2.91224   1
  -6  22   1 -1.3964  2.3637   3
   6  22  -1 1.88256 3.42272   3
  -6  22   1 1.76767 3.26834   3
  -5 -22   1 68.1496  7.7823   1
   5 -22  -1 59.3456  8.0346   3
   5 -22  -1 62.1594  7.2164   1
  -5  22   1 58.8219  6.9069   3
  -5  22   1 54.5129  7.4873   3
   5  22  -1 77.0522  7.3277   1
   5  22  -1 53.0891  7.3713   3
   4 -22  -1 19.7004  3.8562   1
   4 -22  -1 21.8474  4.7776   3
  -4 -22   1 22.5840  4.4238   1
   4  22  -1 19.8438  3.5125   1
  -4  22   1 17.1357  4.2627   3
  -4  22   1 19.1508  3.6197   3
   4  22  -1 22.1620  4.2154   3
   3 -22  -1 315.717  28.080   1
  -3 -22   1 289.548  28.194   1
   3 -22  -1 326.072  28.992   3
   3  22  -1 305.999  28.705   3
  -3  22   1 290.646  28.519   3
  -3  22   1 303.514  28.695   3
   3  22  -1 311.083  27.893   1
  -2 -22   1 3.99996 2.97500   1
   2 -22  -1 0.38832 2.75929   1
   2 -22  -1 -0.5999  2.1744   5
  -2  22   1 2.85872 2.91953   3
   2  22  -1 7.35309 3.09668   3
  -2  22   1 -1.8129  3.5809   3
  -1 -22   1 442.440  40.133   1
   1 -22  -1 459.677  40.192   1
  -1  22   1 403.828  41.050   3
   1  22  -1 441.504  40.271   5
  -1  22   1 452.297  41.046   3
   1  22  -1 462.457  40.950   3
   0 -22   1 3.69343 2.57512   1
   0 -22   1 3.85566 1.92802   1
   0 -22  -1 -0.8138  2.6583   1
   0  22   1 1.27381 3.18631   3
   0  22  -1 0.40113 2.54897   3
   0  22   1 -3.7965  2.0379   1
   0  22  -1 1.75020 2.96163   3
   0  22  -1 -1.7660  2.3695   5
   0  22   1 3.37612 2.02793   5
   1 -22   1 212.311  21.171   1
   1 -22   1 227.325  21.440   5
  -1 -22  -1 224.073  21.567   1
   1 -22   1 240.952  21.406   1
   1  22   1 236.707  21.357   1
   1  22   1 242.176  22.174   3
  -1  22  -1 256.990  21.732   3
  -1  22  -1 218.649  21.582   3
   2 -22   1 17.2337  3.5280   1
   2 -22   1 24.5301  3.2317   1
   2 -22   1 14.3542  3.6925   5
  -2 -22  -1 15.3070  4.1098   1
   2  22   1 28.0285  3.6208   1
  -2  22  -1 21.3663  3.0380   3
   2  22   1 21.6264  4.3248   3
  -2  22  -1 19.4201  3.3411   3
   3 -22   1 198.856  17.441   1
  -3 -22  -1 198.495  17.923   1
   3 -22   1 172.540  17.501   1
  -3 -22  -1 189.420  17.191   4
   3  22   1 197.142  17.558   1
   3  22   1 165.059  18.184   3
   4 -22   1 135.077  13.197   1
  -4 -22  -1 147.553  13.876   1
   4  22   1 127.607  13.904   3
   4  22   1 137.062  13.232   1
  -5 -22  -1 14.9628  4.4652   1
   5 -22   1 16.7910  3.6010   1
  -5 -22  -1 13.4119  5.1801   6
   5  22   1 21.5978  3.6881   1
   5  22   1 23.8373  4.4602   3
  -6 -22  -1 46.1370  7.3712   1
  -6 -22  -1 44.1683  7.3021   6
   6 -22   1 43.8879  5.9844   1
  -6 -22  -1 42.4846  7.0264   3
   6  22   1 48.8738  6.6665   3
   6  22   1 51.0482  6.1992   1
   7 -22   1 6.47601 3.21790   1
   7 -22   1 -3.4947  3.3593   2
  -7 -22  -1 -2.1792  4.2661   3
   7  22   1 -0.3748  4.1817   3
   7  22   1 -2.2374  3.0355   1
   8 -22   1 29.7657  5.2298   1
   8 -22   1 27.2975  5.3233   2
  -8 -22  -1 33.3020  6.8410   3
   8  22   1 21.4153  5.1499   1
   8  22   1 39.7734  6.9095   3
  -9 -22  -1 -0.6634  4.8273   3
   9 -22   1 -3.6440  3.5616   1
  10 -22   1 26.9979  5.5184   1
 -10 -22  -1 12.5522  5.9593   3
  11 -22   1 1.76066 4.37129   1
 -11 -22  -1 5.23478 5.71097   3
  12 -22   1 4.32065 5.00010   1
 -12 -22  -1 1.98746 6.09132   3
  12 -23  -1 37.2238  7.3092   1
 -12 -23   1 24.2518  8.2038   3
 -11 -23   1 4.15116 6.18687   3
  11 -23  -1 -2.3148  4.3437   1
 -11  23   1 -1.5388  3.0514   3
  10 -23  -1 13.7018  5.2778   1
 -10 -23   1 24.6220  7.0954   3
 -10  23   1 27.0880  4.3448   3
  10  23  -1 18.4686  6.5098   3
  -9 -23   1 18.2068  6.2761   3
   9 -23  -1 18.3350  4.9110   1
   9 -23  -1 12.2829  5.3111   2
  -9  23   1 17.4937  3.7848   3
   9  23  -1 11.2790  5.7447   3
   8 -23  -1 8.79730 4.22603   1
   8 -23  -1 10.4389  4.5933   2
  -8 -23   1 2.04541 5.08141   3
   8  23  -1 4.80091 4.84050   3
  -8  23   1 15.5742  3.4509   3
   7 -23  -1 3.82328 3.50382   1
   7 -23  -1 2.46512 3.89308   2
  -7 -23   1 -2.4399  4.5307   3
  -7  23   1 0.98358 3.51121   3
  -7  23   1 -0.0720  2.5994   3
   7  23  -1 6.65937 4.13133   3
  -6 -23   1 10.5769  4.6973   3
   6 -23  -1 15.8761  3.8629   1
  -6 -23   1 10.5613  4.5120   1
  -6  23   1 8.60842 3.70477   3
   6  23  -1 12.2193  3.5140   1
   6  23  -1 9.32930 3.96245   3
  -6  23   1 8.30065 2.92140   3
   5 -23  -1 98.8465 10.2425   1
  -5 -23   1 99.8169 10.8538   1
   5 -23  -1 116.373  11.483   3
   5  23  -1 87.2128 10.1264   1
  -5  23   1 94.3700 10.1530   3
   5  23  -1 94.3319 10.6446   3
  -5  23   1 106.552  10.535   3
   4 -23  -1 24.9658  5.0157   3
  -4 -23   1 21.7295  4.4643   1
   4 -23  -1 26.4817  4.2041   1
  -4  23   1 23.2776  3.8229   3
   4  23  -1 20.4568  4.2567   3
   4  23  -1 19.6843  3.6201   1
  -4  23   1 17.0183  4.4092   3
  -3 -23   1 129.710  12.469   1
   3 -23  -1 108.337  12.199   1
   3 -23  -1 123.737  13.079   3
  -3  23   1 133.406  12.749   3
  -3  23   1 123.543  12.432   3
   3  23  -1 121.695  12.032   1
   3  23  -1 130.914  12.629   3
   2 -23  -1 14.1578  3.5151   1
   2 -23  -1 14.3986  2.8490   5
  -2 -23   1 14.7926  3.6959   1
  -2  23   1 14.4299  3.5628   3
  -2  23   1 13.1617  4.1514   3
   2  23  -1 13.1713  3.4296   3
   1 -23  -1 11.4723  3.1064   1
  -1 -23   1 10.7645  3.1193   1
  -1  23   1 5.74186 3.17592   3
  -1  23   1 6.98979 3.84175   3
  -1  23   1 0.32599 1.54544   1
   1  23  -1 4.89230 2.83746   5
   1  23  -1 3.15529 2.86729   3
   0 -23  -1 20.6459  3.8273   1
   0 -23   1 20.1752  3.6278   1
   0  23   1 15.9915  2.9307   5
   0  23  -1 17.7835  3.7634   3
   0  23   1 27.1714  4.1950   3
   0  23  -1 17.0632  3.4735   5
   0  23   1 21.5129  3.4746   1
   0  23  -1 20.0403  3.4278   3
  -1 -23  -1 116.905  11.760   1
   1 -23   1 98.0908 11.3914   5
   1 -23   1 113.949  11.530   1
   1 -23   1 127.360  11.343   1
   1  23   1 112.486  12.176   3
  -1  23  -1 113.832  11.629   3
  -1  23  -1 143.258  11.610   3
   1  23   1 112.517  11.439   1
   2 -23   1 27.9897  4.4448   1
  -2 -23  -1 32.3552  5.1467   1
   2 -23   1 27.6773  4.5024   5
   2 -23   1 37.3929  4.2845   1
  -2  23  -1 33.9514  4.2877   3
   2  23   1 27.4330  5.0474   3
   2  23   1 41.2916  4.6327   1
  -2  23  -1 32.0842  3.9983   3
   3 -23   1 64.8972  7.2216   1
  -3 -23  -1 67.4913  7.0969   4
  -3 -23  -1 75.9774  7.9961   1
   3 -23   1 72.8547  7.5260   1
   3  23   1 67.7599  8.2142   3
   3  23   1 65.1460  7.5055   1
   4 -23   1 113.744  10.502   1
  -4 -23  -1 99.2366 10.9384   1
   4  23   1 95.2576 10.4377   1
   4  23   1 107.318  11.236   3
  -5 -23  -1 57.8447  7.3854   1
  -5 -23  -1 55.2732  7.7869   6
   5 -23   1 62.6149  6.3001   1
   5  23   1 45.8139  6.6271   3
   5  23   1 41.3933  5.9950   1
  -6 -23  -1 2.33969 4.41444   1
  -6 -23  -1 3.91646 4.05176   3
   6 -23   1 6.42851 2.98866   1
   6  23   1 0.42078 3.70254   3
   6  23   1 0.94767 2.71358   1
   7 -23   1 16.9621  4.3406   2
  -7 -23  -1 15.4158  5.4887   3
   7 -23   1 15.1809  4.0521   1
   7  23   1 17.8093  4.2359   1
   7  23   1 15.5765  5.2046   3
   8 -23   1 27.3932  4.9075   2
  -8 -23  -1 14.9199  5.6516   3
   8 -23   1 12.1602  3.9398   1
   8  23   1 11.2439  5.6349   3
   8  23   1 10.7958  4.3519   1
  -9 -23  -1 7.04690 5.63992   3
   9 -23   1 17.6158  4.6174   1
 -10 -23  -1 13.6400  5.8326   3
  10 -23   1 8.02560 4.53885   1
  11 -23   1 16.2434  5.0005   1
 -11 -23  -1 7.10063 6.01946   3
 -12 -23  -1 5.69097 6.31642   3
  12 -23   1 6.93721 5.07590   1
 -12 -24   1 22.7599  7.9698   3
  12 -24  -1 28.2789  6.8216   1
  11 -24  -1 6.67761 5.08731   1
 -11 -24   1 4.08782 6.21629   3
 -11  24   1 2.67559 3.05348   3
  10 -24  -1 1.80339 4.33653   1
 -10 -24   1 8.50578 6.02710   3
  10  24  -1 3.05250 5.82056   3
 -10  24   1 -1.6684  3.0097   3
   9 -24  -1 253.653  23.031   2
  -9 -24   1 231.498  23.912   3
   9 -24  -1 236.160  22.542   1
  -9  24   1 230.711  22.011   3
   9  24  -1 207.160  23.134   3
   8 -24  -1 -3.3904  3.9942   2
   8 -24  -1 -2.5657  3.6476   1
  -8 -24   1 1.70321 5.31738   3
  -8  24   1 1.26096 3.00942   3
   8  24  -1 5.42499 4.69471   3
   7 -24  -1 53.5466  6.7635   1
   7 -24  -1 35.6081  6.5583   2
  -7 -24   1 50.4101  7.6954   3
  -7 -24   1 50.2551  8.0114   1
  -7  24   1 42.1519  6.1386   3
   7  24  -1 46.3477  6.8697   3
  -7  24   1 45.3503  5.9110   3
  -6 -24   1 3.12590 4.19596   1
   6 -24  -1 6.05227 3.41236   1
   6  24  -1 10.2635  3.4804   1
  -6  24   1 3.52334 3.56940   3
   6  24  -1 11.9525  4.1479   3
  -6  24   1 6.11288 2.90323   3
  -5 -24   1 57.5644  7.5730   1
   5 -24  -1 66.9528  6.8881   1
   5 -24  -1 58.3746  7.7722   3
   5  24  -1 48.0054  6.9338   3
   5  24  -1 61.3967  6.9065   1
  -5  24   1 50.6973  6.5276   3
  -5  24   1 47.8743  6.7239   3
   4 -24  -1 7.21201 4.24257   3
   4 -24  -1 16.0437  3.3123   1
  -4 -24   1 6.41090 3.51552   1
   4  24  -1 6.93510 3.42903   3
  -4  24   1 5.99410 2.83998   3
   4  24  -1 2.24101 2.61468   1
  -4  24   1 7.43758 3.64402   3
   3 -24  -1 11.0159  3.2750   1
  -3 -24   1 18.8373  3.8279   1
   3 -24  -1 9.23477 4.08388   3
  -3  24   1 11.3217  4.1016   3
   3  24  -1 16.6685  3.1987   1
  -3  24   1 18.2365  3.3971   3
   3  24  -1 13.7913  3.5418   3
   2 -24  -1 68.3113  7.1134   1
  -2 -24   1 62.7792  7.1314   1
   2 -24  -1 55.0927  6.3868   5
  -2  24   1 65.8023  7.7080   3
   2  24  -1 58.1206  7.2830   3
  -2  24   1 57.2501  7.3180   3
  -1 -24   1 1.57181 2.67500   1
   1 -24  -1 2.65674 2.77003   1
   1  24  -1 -2.8898  2.7734   3
   1  24  -1 1.02290 2.66952   5
  -1  24   1 -1.8690  3.6186   3
  -1  24   1 -6.5940  2.8134   3
   0 -24  -1 656.754  59.528   1
   0 -24   1 630.177  59.396   1
   0  24  -1 688.574  60.591   3
   0  24  -1 690.141  60.661   3
   0  24  -1 642.490  59.673   5
   0  24   1 669.463  59.341   1
   0  24   1 651.599  60.838   3
   0  24   1 665.573  59.446   5
   1 -24   1 12.6371  3.1667   5
  -1 -24  -1 10.4314  3.3977   1
   1 -24   1 11.2872  2.5163   1
   1 -24   1 7.39883 2.85441   1
   1  24   1 11.0875  2.7946   1
   1  24   1 10.4907  2.6815   5
   1  24   1 10.5975  3.4697   3
  -1  24  -1 11.2355  2.7409   3
  -1  24  -1 7.93235 3.13700   3
   2 -24   1 126.751  12.220   1
   2 -24   1 145.100  12.550   5
   2 -24   1 149.445  12.436   1
  -2 -24  -1 119.876  12.610   1
  -2  24  -1 118.299  12.309   3
  -2  24  -1 110.121  12.195   3
   2  24   1 137.458  12.414   1
   2  24   1 124.585  13.062   3
  -3 -24  -1 17.8673  4.1341   1
   3 -24   1 17.6612  3.7912   5
   3 -24   1 15.5034  3.4906   1
   3 -24   1 25.9844  3.4355   1
  -3 -24  -1 20.9719  3.2597   4
   3  24   1 21.6271  3.6380   1
   3  24   1 16.2036  4.1123   3
  -4 -24  -1 16.5001  4.5570   1
   4 -24   1 22.2454  3.9768   1
   4  24   1 26.2619  4.6965   3
   4  24   1 30.9150  4.2277   1
  -5 -24  -1 70.9909  8.3678   1
   5 -24   1 61.6395  7.1485   1
   5  24   1 60.8197  7.3037   1
   5  24   1 62.3414  7.9899   3
  -6 -24  -1 -1.7664  4.2411   1
  -6 -24  -1 -1.0467  3.9671   3
   6 -24   1 1.14861 2.84625   1
   6  24   1 -4.2694  2.6392   1
   6  24   1 -1.3592  3.7093   3
  -7 -24  -1 34.0279  6.7135   3
   7 -24   1 37.8763  5.4626   1
   7 -24   1 42.1614  5.8414   2
   7  24   1 42.8640  6.6846   3
   7  24   1 22.9213  5.1724   1
   8 -24   1 1.08924 3.37335   1
  -8 -24  -1 10.0398  5.3051   3
   8 -24   1 -0.5793  3.9277   2
   8  24   1 1.16996 3.72400   1
   8  24   1 -2.6829  5.0375   3
   9 -24   1 59.8144  7.8028   1
  -9 -24  -1 50.7982  9.2550   3
  10 -24   1 12.4149  4.4709   1
 -10 -24  -1 -3.5723  5.1525   3
  11 -24   1 -0.4898  4.2840   1
 -11 -24  -1 6.26627 5.91308   3
  12 -24   1 -1.4334  4.6225   1
 -12 -24  -1 2.22488 5.89218   3
  12 -25  -1 14.8720  6.2001   1
 -12 -25   1 13.6281  7.4439   3
 -11 -25   1 11.0735  6.6872   3
  11 -25  -1 2.55604 5.16048   1
 -11  25   1 4.25506 3.24902   3
  10 -25  -1 17.2900  5.1673   1
 -10 -25   1 9.18699 6.27126   3
 -10  25   1 11.3202  3.5488   3
  10  25  -1 13.3128  6.1519   3
  -9 -25   1 8.45171 5.99787   3
   9 -25  -1 9.80032 4.68346   1
   9 -25  -1 14.0605  5.3152   2
  -9  25   1 12.8411  3.6323   3
   9  25  -1 10.5434  5.4990   3
   8 -25  -1 14.0975  4.5601   1
   8 -25  -1 1.91169 4.38137   2
  -8 -25   1 14.2679  5.8293   3
  -8  25   1 6.27625 3.30066   3
   8  25  -1 4.31390 4.82025   3
   7 -25  -1 45.5006  6.1384   1
   7 -25  -1 41.9027  6.4069   2
  -7 -25   1 26.2635  6.6360   3
  -7 -25   1 29.9512  6.7592   1
  -7  25   1 43.2186  5.3063   3
  -7  25   1 37.7302  5.5740   3
   7  25  -1 22.6781  5.9176   3
   6 -25  -1 10.7175  3.7224   1
  -6 -25   1 9.27866 4.69129   1
  -6  25   1 9.45647 3.79685   3
   6  25  -1 7.73556 4.04606   3
  -6  25   1 10.0817  3.2030   3
  -5 -25   1 101.499  11.678   1
   5 -25  -1 113.054  11.340   1
   5 -25  -1 110.340  12.434   3
   5  25  -1 96.3729 11.2324   1
  -5  25   1 121.409  11.587   3
   5  25  -1 114.246  11.786   3
  -5  25   1 114.540  11.218   3
   4 -25  -1 2.91436 2.89270   1
  -4 -25   1 -0.8171  2.9794   1
   4 -25  -1 4.65809 4.02334   3
  -4  25   1 0.13085 3.44779   3
   4  25  -1 2.58354 3.22652   3
  -4  25   1 1.22065 2.55208   3
   4  25  -1 1.29883 2.57248   1
  -3 -25   1 88.0601  9.1766   1
   3 -25  -1 82.6026  8.9343   1
  -3  25   1 85.2486  9.0565   3
   3  25  -1 88.8868  9.2290   3
   3  25  -1 71.0966  8.6763   1
  -3  25   1 94.5782  9.5532   3
   2 -25  -1 19.3622  3.7358   1
  -2 -25   1 20.8551  3.9384   1
   2 -25  -1 14.2970  3.0369   5
  -2  25   1 15.7707  4.3047   3
   2  25  -1 25.2008  3.8379   3
  -2  25   1 20.3223  3.8116   3
  -1 -25   1 2.80650 2.84151   1
   1 -25  -1 0.50590 2.65335   1
   1  25  -1 -1.5745  2.5937   5
  -1  25   1 4.87706 3.04099   3
   1  25  -1 1.29855 2.77135   3
  -1  25   1 -0.8725  3.7682   3
   0 -25   1 15.9497  3.4201   1
   0 -25  -1 13.8393  3.5907   1
   0  25   1 17.2623  3.3134   1
   0  25  -1 11.4222  3.7165   3
   0  25   1 27.0877  4.1107   3
   0  25  -1 20.3795  3.4530   5
   0  25  -1 16.5302  3.2532   3
   0  25   1 18.1370  2.8478   5
  -1 -25  -1 70.1349  7.7488   1
   1 -25   1 69.2499  7.4779   5
   1 -25   1 67.4414  7.2710   1
   1 -25   1 71.4616  7.4952   1
   1  25   1 57.9304  7.0227   5
  -1  25  -1 79.4707  7.4263   3
   1  25   1 63.1332  8.1611   3
  -1  25  -1 78.3453  7.6792   3
   1  25   1 64.0124  7.3728   1
   2 -25   1 216.412  18.952   1
  -2 -25  -1 209.068  19.433   1
   2 -25   1 180.584  19.020   1
   2 -25   1 172.092  19.041   5
  -2  25  -1 226.457  19.206   3
   2  25   1 191.088  19.033   1
  -2  25  -1 223.714  19.140   3
   2  25   1 211.777  19.820   3
   3 -25   1 60.8896  6.4815   5
   3 -25   1 60.2687  6.2659   1
  -3 -25  -1 52.5886  6.9519   1
   3 -25   1 55.4337  6.2337   1
   3  25   1 45.1038  6.1691   1
   3  25   1 51.2986  6.7087   3
   4 -25   1 31.7261  4.6290   1
  -4 -25  -1 27.3070  5.3122   1
  -4 -25  -1 32.2219  3.9774   4
   4  25   1 31.5889  4.6535   1
   4  25   1 29.0903  5.0758   3
  -5 -25  -1 7.14349 4.12242   1
   5 -25   1 12.2944  3.3193   1
   5  25   1 11.0363  3.1675   1
   5  25   1 9.75592 3.93425   3
   6 -25   1 15.9828  3.7449   1
   6  25   1 7.69557 4.35228   3
   6  25   1 12.7122  3.6246   1
  -7 -25  -1 21.0985  5.9174   3
   7 -25   1 20.4943  4.5901   1
   7 -25   1 28.0384  4.9233   2
   7  25   1 19.5488  4.6679   1
   7  25   1 23.3099  5.7660   3
  -8 -25  -1 4.92092 5.10015   3
   8  25   1 3.59131 5.36936   3
  -9 -25  -1 4.37400 5.43199   3
   9 -25   1 1.25620 3.90084   1
  10 -25   1 31.1536  5.9069   1
 -10 -25  -1 22.1954  6.9809   3
  11 -25   1 4.42028 4.45849   1
 -11 -25  -1 5.83668 5.86517   3
 -12 -25  -1 -1.9130  5.6128   3
  12 -25   1 8.57349 5.20462   1
 -12 -26   1 2.64972 6.79728   3
  12 -26  -1 14.2026  5.9981   1
 -11 -26   1 5.08873 6.05015   3
  11 -26  -1 -6.8544  4.2677   1
  10 -26  -1 51.2202  8.0398   1
 -10 -26   1 45.7870  9.2951   3
  10  26  -1 48.1862  8.7281   3
 -10  26   1 49.6369  6.3844   3
   9 -26  -1 2.27425 4.23860   1
   9 -26  -1 0.21755 4.49166   2
  -9 -26   1 -0.6316  5.1845   3
   9  26  -1 -3.1490  5.0474   3
  -9  26   1 -0.1119  3.1864   3
  -8 -26   1 16.7460  6.4362   3
   8 -26  -1 14.0382  4.6266   1
   8 -26  -1 8.31400 4.83789   2
   8  26  -1 11.7058  5.3287   3
  -8  26   1 19.4429  3.8498   3
  -7 -26   1 0.90414 4.94213   3
   7 -26  -1 4.89160 3.83494   1
  -7  26   1 2.53582 2.93620   3
   7  26  -1 -0.4020  4.1953   3
  -7  26   1 7.54218 3.87943   3
  -6 -26   1 4.33534 4.36931   1
   6 -26  -1 3.48938 3.33481   1
  -6  26   1 3.88123 2.90048   3
  -6  26   1 4.13498 3.73129   3
   6  26  -1 4.64444 4.20818   3
   5 -26  -1 82.0964  7.9859   1
  -5 -26   1 70.6060  8.3950   1
  -5  26   1 64.4280  7.9688   3
   5  26  -1 65.7997  7.7760   1
   5  26  -1 57.2582  7.9410   3
  -5  26   1 61.2623  7.4701   3
  -4 -26   1 -3.0596  3.0197   1
   4 -26  -1 -2.0785  2.6360   1
   4 -26  -1 -0.7446  3.9287   3
  -4  26   1 -0.8309  2.5076   3
   4  26  -1 3.67061 3.21199   3
   4  26  -1 -2.5831  2.5029   1
  -4  26   1 -1.6209  3.4259   3
   3 -26  -1 121.892  11.264   5
   3 -26  -1 119.252  11.674   1
  -3 -26   1 116.496  11.806   1
  -3  26   1 120.126  11.746   3
  -3  26   1 109.616  11.990   3
   3  26  -1 104.775  11.338   1
   3  26  -1 115.513  11.891   3
   2 -26  -1 2.32303 2.21360   5
  -2 -26   1 -2.0632  2.7378   1
   2 -26  -1 -3.8132  2.4936   1
   2  26  -1 -0.1923  2.7544   3
  -2  26   1 -1.9117  2.5944   3
  -2  26   1 -1.8488  3.5411   3
   1 -26  -1 18.8268  3.7714   1
  -1 -26   1 16.1005  3.6143   1
   1  26  -1 18.5503  3.5083   3
   1  26  -1 11.2300  3.3351   5
  -1  26   1 24.2621  3.9470   3
  -1  26   1 14.4053  4.4404   3
   0 -26   1 6.31670 2.74721   1
   0 -26  -1 6.33050 2.95105   1
   0  26  -1 5.98716 2.78808   5
   0  26   1 -1.0060  2.9875   3
   0  26   1 3.39770 2.20479   5
   0  26   1 1.81417 2.44594   1
   0  26  -1 3.62690 2.53616   3
   0  26  -1 9.62779 3.33853   3
   1 -26   1 320.162  30.878   1
  -1 -26  -1 333.348  31.147   1
   1 -26   1 334.376  31.051   5
   1 -26   1 352.417  30.784   1
   1  26   1 340.883  30.809   5
  -1  26  -1 345.834  31.340   3
   1  26   1 342.012  30.870   1
   1  26   1 319.811  31.700   3
  -1  26  -1 358.709  31.442   3
  -2 -26  -1 31.5668  4.7559   1
   2 -26   1 28.0066  4.1202   1
   2 -26   1 23.4981  3.6579   1
   2 -26   1 22.8712  4.1271   5
  -2  26  -1 25.7049  3.4534   3
   2  26   1 37.6887  4.2816   1
   2  26   1 20.4987  4.4607   3
  -2  26  -1 21.3642  3.6910   3
  -3 -26  -1 7.03493 3.46969   1
   3 -26   1 8.28076 2.49568   1
   3 -26   1 4.49274 2.60624   1
   3 -26   1 7.23428 3.05124   5
   3  26   1 -0.8361  3.0732   3
   3  26   1 7.63649 2.76727   1
   4 -26   1 5.77195 2.79801   1
  -4 -26  -1 8.88168 3.79888   1
   4  26   1 2.12652 2.58752   1
   4  26   1 -6.2479  3.0221   3
  -5 -26  -1 -5.5372  3.4743   1
   5 -26   1 2.52086 2.82715   1
   5  26   1 -2.5151  3.3365   3
   5  26   1 2.18379 2.73796   1
   6 -26   1 42.5288  5.4070   1
   6  26   1 29.4234  5.9712   3
   6  26   1 30.9503  5.2863   1
   7 -26   1 7.19575 4.08047   2
  -7 -26  -1 -0.1973  4.6597   3
   7 -26   1 0.47480 3.38674   1
   7  26   1 0.91621 3.56298   1
   7  26   1 12.7928  5.0620   3
   8 -26   1 263.767  22.510   1
  -8 -26  -1 218.130  23.642   3
   8  26   1 211.999  23.449   3
   9 -26   1 -4.5444  3.4987   1
  -9 -26  -1 -0.6934  5.1168   3
 -10 -26  -1 52.0907  9.2098   3
  10 -26   1 60.5966  8.2940   1
 -11 -26  -1 4.64632 5.92575   3
  11 -26   1 -1.7788  4.2219   1
 -12 -26  -1 2.24854 6.22474   3
  12 -26   1 6.08161 5.09673   1
 -12 -27   1 -3.8545  6.4260   3
  12 -27  -1 -2.0427  4.9992   1
  11 -27  -1 1.92906 4.92668   1
 -11 -27   1 8.68632 6.65506   3
 -10 -27   1 9.26829 6.38164   3
  10 -27  -1 -3.1807  4.2040   1
  10  27  -1 0.67894 5.87508   3
 -10  27   1 1.76360 3.11848   3
  -9 -27   1 -3.4174  5.3590   3
   9 -27  -1 0.09989 4.75926   2
   9 -27  -1 -1.7388  4.1185   1
   9  27  -1 -3.8654  5.1741   3
  -9  27   1 -4.1934  2.9325   3
  -8 -27   1 6.82967 5.90163   3
   8 -27  -1 -1.6886  4.2977   2
   8 -27  -1 -2.6060  3.7966   1
   8  27  -1 5.24013 4.97341   3
  -8  27   1 -0.6958  3.1396   3
   7 -27  -1 11.0275  4.1786   1
  -7 -27   1 -3.8608  4.8028   3
   7  27  -1 -0.6520  4.2782   3
  -7  27   1 5.64465 3.12378   3
   6 -27  -1 5.19600 3.63423   1
  -6 -27   1 7.44492 4.52334   1
  -6  27   1 3.18370 2.88671   3
  -6  27   1 5.67832 3.81165   3
   6  27  -1 4.12653 4.07700   3
  -5 -27   1 73.9114  9.8451   1
   5 -27  -1 95.9184  9.5405   1
  -5  27   1 76.1506  9.0669   3
  -5  27   1 91.2236  9.5949   3
   5  27  -1 94.9212  9.9555   3
   4 -27  -1 0.85139 2.66510   1
   4 -27  -1 0.78632 4.14824   3
  -4 -27   1 -5.9195  2.7019   1
   4  27  -1 1.39931 3.20678   3
  -4  27   1 -4.1882  2.4050   3
  -4  27   1 -1.9398  3.4433   3
   4  27  -1 -1.0560  2.6244   1
   3 -27  -1 0.88363 2.37023   5
  -3 -27   1 6.34703 3.22850   1
   3 -27  -1 -1.7015  2.6590   1
  -3  27   1 4.93450 2.79183   3
  -3  27   1 7.57297 3.73361   3
   3  27  -1 9.59242 3.10119   3
   3  27  -1 2.26077 2.39246   1
  -2 -27   1 2.94543 2.90303   1
   2 -27  -1 1.66133 2.81528   1
   2 -27  -1 2.67129 2.22261   5
  -2  27   1 -1.1166  3.6124   3
   2  27  -1 -2.1484  2.5298   3
  -2  27   1 5.86898 2.81438   3
   1 -27  -1 2.15479 2.77696   1
  -1 -27   1 5.21094 2.77764   1
   1  27  -1 3.59574 2.68894   3
  -1  27   1 3.16617 3.83233   3
   1  27  -1 1.24756 2.61768   5
  -1  27   1 8.25500 3.14399   3
   0 -27   1 14.2613  3.2158   1
   0 -27  -1 12.1998  3.3777   1
   0  27   1 14.1132  3.1065   1
   0  27  -1 9.90053 3.01925   5
   0  27  -1 15.8154  3.7163   3
   0  27   1 10.0603  3.4910   3
   0  27   1 10.2495  2.5508   5
   0  27  -1 15.6307  3.0111   3
   1 -27   1 22.1948  4.1719   5
   1 -27   1 23.9055  3.7302   1
   1 -27   1 26.1027  4.1115   1
   1  27   1 29.7902  4.4884   3
   1  27   1 22.1740  3.9010   1
   1  27   1 27.6788  3.7697   5
  -1  27  -1 46.8335  4.4614   3
  -1  27  -1 27.1421  4.1467   3
   2 -27   1 21.0408  3.7222   1
  -2 -27  -1 26.7654  4.4419   1
   2 -27   1 23.6654  3.5958   1
   2 -27   1 16.8676  3.7744   5
  -2  27  -1 19.1195  3.4407   3
  -2  27  -1 21.5598  3.1769   3
   2  27   1 17.1474  4.1749   3
   2  27   1 23.9555  3.7995   1
   3 -27   1 0.60383 2.25473   1
  -3 -27  -1 3.68605 3.16423   1
   3 -27   1 4.99296 2.89398   5
   3 -27   1 2.21915 2.63181   1
   3  27   1 -0.0601  2.4178   1
   3  27   1 5.08354 3.25920   3
   4 -27   1 1.46037 2.64285   1
  -4 -27  -1 -4.0094  3.3895   1
   4  27   1 -1.8054  3.2429   3
   4  27   1 1.70854 2.56244   1
   5 -27   1 1.82505 2.94773   1
  -5 -27  -1 7.51241 4.30869   1
   5  27   1 2.16354 2.97811   1
   5  27   1 8.89992 3.98780   3
   6 -27   1 4.22293 3.42929   1
   6  27   1 1.64963 4.40673   3
   6  27   1 14.1428  3.8112   1
   7 -27   1 13.2532  3.9480   1
  -7 -27  -1 6.14211 5.03948   3
   7  27   1 6.90920 5.09287   3
  -8 -27  -1 9.99859 5.53589   3
   8 -27   1 17.1709  4.3771   1
   8  27   1 10.1359  5.6970   3
   9 -27   1 8.08138 4.12217   1
  -9 -27  -1 0.01808 5.36382   3
 -10 -27  -1 17.6437  6.2767   3
  10 -27   1 9.00161 4.64086   1
 -11 -27  -1 -0.0350  5.7959   3
  11 -27   1 3.71731 4.35538   1
  12 -27   1 9.95001 5.57359   1
 -12 -27  -1 25.3384  7.6042   3
 -12 -28   1 2.26700 6.97124   3
  12 -28  -1 4.70615 5.79923   1
 -11 -28   1 -3.3407  5.9419   3
  11 -28  -1 2.10704 4.93013   1
 -10 -28   1 4.23388 6.43353   3
  10 -28  -1 -5.3266  4.2692   1
 -10  28   1 2.21682 3.21704   3
  10  28  -1 9.38262 6.19617   3
   9 -28  -1 44.4635  7.2897   2
  -9 -28   1 26.5796  8.0503   3
   9 -28  -1 33.9770  6.7652   1
   9  28  -1 41.6638  7.6073   3
  -9  28   1 45.1997  5.7840   3
  -8 -28   1 10.2346  5.9148   3
   8 -28  -1 -5.8626  3.7832   1
   8 -28  -1 1.96643 4.56885   2
  -8  28   1 -2.4882  3.0976   3
   8  28  -1 0.71349 4.83530   3
  -7 -28   1 17.6495  6.2165   3
   7 -28  -1 27.5840  5.3148   1
   7  28  -1 29.6728  5.8506   3
  -7  28   1 24.6936  4.4638   3
   6 -28  -1 21.6837  4.6663   1
  -6 -28   1 13.7970  5.2681   1
  -6  28   1 17.3347  3.6618   3
   6  28  -1 9.91667 4.50472   3
  -6  28   1 12.7990  4.3105   3
   5 -28  -1 15.6176  4.1906   1
  -5 -28   1 15.4953  4.7440   1
  -5  28   1 24.9065  3.8358   3
   5  28  -1 13.0154  4.4366   3
  -5  28   1 15.8261  4.2605   3
   4 -28  -1 3.86472 4.30605   3
  -4 -28   1 4.25958 3.49267   1
   4 -28  -1 3.68067 2.91203   1
  -4  28   1 -1.4721  2.5779   3
  -4  28   1 -3.1221  3.5907   3
   4  28  -1 -3.4928  3.0958   3
  -3 -28   1 -1.9356  2.8484   1
   3 -28  -1 5.62728 2.54253   5
   3 -28  -1 5.68563 2.97375   1
   3  28  -1 0.24800 2.17681   1
   3  28  -1 -0.1157  2.9526   3
  -3  28   1 5.11306 3.73709   3
  -3  28   1 1.01451 2.71762   3
   2 -28  -1 43.8415  5.6543   1
   2 -28  -1 33.5734  4.7663   5
  -2 -28   1 46.0082  5.8127   1
   2  28  -1 42.0349  5.6719   5
  -2  28   1 47.6399  5.5617   3
  -2  28   1 46.0313  6.1539   3
   2  28  -1 35.2449  5.2284   3
  -1 -28   1 -3.1258  2.4539   1
   1 -28  -1 0.97989 2.60336   1
   1  28  -1 -1.3080  2.5395   5
  -1  28   1 -0.6332  2.8273   3
   1  28  -1 -3.0559  2.5163   3
  -1  28   1 1.87436 3.85331   3
   0 -28  -1 211.139  20.137   1
   0 -28   1 216.366  20.049   1
   0  28   1 184.641  19.805   1
   0  28   1 208.806  19.700   5
   0  28   1 215.929  20.576   3
   0  28  -1 237.377  20.510   3
   0  28  -1 221.061  20.265   3
   0  28  -1 221.939  20.056   5
  -1 -28  -1 4.95013 2.97453   1
   1 -28   1 2.02747 2.49541   1
   1 -28   1 0.76458 2.14950   1
  -1  28  -1 5.54788 2.44414   3
  -1  28  -1 4.01407 2.90941   3
   1  28   1 -1.6625  2.3655   1
   1  28   1 3.61045 2.34352   5
   1  28   1 -0.7208  2.9198   3
   2 -28   1 13.7648  3.3489   5
  -2 -28  -1 18.3014  3.9542   1
   2 -28   1 12.3386  2.8955   1
   2 -28   1 14.8494  3.2196   1
  -2  28  -1 11.0981  2.9194   3
   2  28   1 15.8087  3.2507   1
  -2  28  -1 10.1278  2.5361   3
   2  28   1 7.23129 3.49466   3
   3 -28   1 5.91023 2.70634   1
  -3 -28  -1 6.47366 3.50853   1
   3 -28   1 8.91310 3.13324   5
   3 -28   1 3.13356 2.59066   1
   3  28   1 3.92271 2.81893   1
   3  28   1 6.06651 3.52854   3
   4 -28   1 2.09344 2.76322   1
  -4 -28  -1 3.86361 2.39062   4
   4 -28   1 -0.0903  2.9401   5
  -4 -28  -1 -4.8258  3.3416   1
   4  28   1 0.24743 2.70932   1
   4  28   1 -2.9959  3.1989   3
  -5 -28  -1 59.3169  8.1845   1
   5 -28   1 57.5677  7.0260   1
   5  28   1 52.6991  7.5917   3
   5  28   1 60.3046  7.2649   1
   6 -28   1 0.48114 3.41496   1
   6  28   1 1.98801 4.37477   3
   6  28   1 1.92876 3.23684   1
  -7 -28  -1 133.935  15.447   3
   7 -28   1 159.155  14.454   1
   7  28   1 127.729  15.209   3
   8 -28   1 3.81695 3.97074   1
  -8 -28  -1 6.11650 5.05861   3
   8  28   1 -8.6262  5.1154   3
  -9 -28  -1 5.29257 5.59759   3
   9 -28   1 4.15908 4.09971   1
 -10 -28  -1 -3.1787  5.4623   3
  10 -28   1 5.81677 4.26657   1
  11 -28   1 6.56625 4.86755   1
 -11 -28  -1 -6.7250  5.4041   3
  12 -28   1 8.45116 5.39246   1
 -12 -28  -1 14.2872  7.0898   3
  12 -29  -1 11.5137  6.0717   1
 -12 -29   1 14.6424  7.7137   3
 -11 -29   1 -1.7995  6.1181   3
  11 -29  -1 -1.5033  4.8291   1
 -10 -29   1 6.94252 6.77935   3
  10 -29  -1 13.9455  5.3677   1
 -10  29   1 1.45060 3.00110   3
  10  29  -1 0.66778 5.88959   3
   9 -29  -1 8.90512 4.83315   1
   9 -29  -1 6.26124 5.19809   2
  -9 -29   1 1.21209 5.83071   3
  -9  29   1 10.8595  3.5374   3
   9  29  -1 10.5600  5.6153   3
  -8 -29   1 6.88457 5.67525   3
   8 -29  -1 -3.1467  4.0670   1
   8 -29  -1 -4.0021  4.4663   2
  -8  29   1 -2.7834  2.9867   3
   8  29  -1 4.09973 5.07708   3
  -7 -29   1 40.2884  7.8014   3
   7 -29  -1 39.2807  6.6692   1
  -7  29   1 44.1500  5.7416   3
   7  29  -1 43.2436  6.9033   3
   6 -29  -1 95.1837  9.1408   1
  -6 -29   1 85.3754 10.3207   1
  -6  29   1 58.6357  8.2144   3
  -6  29   1 73.0048  8.9259   3
   6  29  -1 75.5428  9.3308   3
   5 -29  -1 28.2012  5.0286   1
  -5 -29   1 21.2141  5.4128   1
  -5  29   1 37.8295  5.3164   3
   5  29  -1 32.5949  5.5280   3
  -5  29   1 25.6164  4.3745   3
   4 -29  -1 -3.8910  2.8081   1
  -4 -29   1 0.50207 3.33836   1
   4  29  -1 -5.9808  3.0718   3
  -4  29   1 0.86156 3.75199   3
  -4  29   1 4.47101 2.84685   3
   3 -29  -1 15.7042  3.5896   1
   3 -29  -1 17.6187  3.1644   5
  -3 -29   1 10.7983  3.6776   1
   3  29  -1 7.64073 3.36118   3
  -3  29   1 17.8065  4.2848   3
  -3  29   1 11.4258  3.1396   3
  -2 -29   1 9.85738 3.28988   1
   2 -29  -1 -0.5788  2.2372   5
   2 -29  -1 -0.5449  2.6193   1
   2  29  -1 -1.2649  2.9087   5
  -2  29   1 8.41008 3.00534   3
  -2  29   1 4.36728 3.76387   3
   2  29  -1 0.34554 2.61916   3
   1 -29  -1 6.20070 3.05622   1
  -1 -29   1 3.73010 2.79209   1
  -1  29   1 12.7371  3.3757   3
   1  29  -1 4.75060 2.84732   5
  -1  29   1 0.11084 3.86864   3
   1  29  -1 2.06252 2.71421   3
   0 -29   1 5.87593 2.68731   1
   0 -29  -1 6.25948 3.00066   1
   0  29  -1 6.16505 2.85635   5
   0  29   1 1.58376 2.41609   1
   0  29  -1 2.95494 3.27840   3
   0  29  -1 5.13137 2.56085   3
   0  29   1 4.99875 3.05752   3
   1 -29   1 -1.7944  2.0329   1
  -1 -29  -1 4.31115 3.04759   1
   1 -29   1 5.87070 2.69023   1
  -1  29  -1 -0.0473  2.2905   3
   1  29   1 3.14373 2.28387   5
   1  29   1 -0.4234  2.9541   3
  -1  29  -1 1.33820 2.88964   3
   1  29   1 -1.1597  2.2633   1
   2 -29   1 10.3095  3.1536   5
   2 -29   1 11.5961  3.1059   1
  -2 -29  -1 8.84310 3.56637   1
   2 -29   1 5.99374 2.63403   1
  -2  29  -1 9.68869 2.88646   3
   2  29   1 17.0845  3.7621   3
  -2  29  -1 12.2437  2.5148   3
   2  29   1 10.4972  3.0824   1
   3 -29   1 75.5869  7.6809   1
  -3 -29  -1 64.5233  7.9287   1
   3 -29   1 65.7146  7.6054   1
   3 -29   1 73.1647  7.6946   5
   3  29   1 60.9398  7.6699   1
   3  29   1 67.2932  8.3854   3
   4 -29   1 0.73786 3.26134   5
  -4 -29  -1 3.34456 3.74528   1
   4 -29   1 -1.0151  2.7701   1
   4  29   1 -0.5055  2.7463   1
   4  29   1 10.3127  3.8439   3
  -5 -29  -1 54.3476  7.8454   1
   5 -29   1 62.2500  6.8872   1
   5  29   1 48.4105  6.7136   1
   5  29   1 47.4216  7.2578   3
   6 -29   1 -1.8188  3.1493   1
   6  29   1 -0.0780  4.4445   3
  -7 -29  -1 11.5265  5.5398   3
   7 -29   1 15.8700  4.4174   1
   7  29   1 19.2426  5.6740   3
   8 -29   1 11.7744  4.1736   1
  -8 -29  -1 8.19339 5.62668   3
   8  29   1 6.17467 5.69223   3
  -9 -29  -1 4.31917 5.41349   3
   9 -29   1 -3.6014  3.8251   1
  10 -29   1 8.30029 4.54465   1
 -10 -29  -1 3.11853 5.74050   3
 -11 -29  -1 1.72269 5.99112   3
  11 -29   1 -3.0073  4.2349   1
 -12 -29  -1 5.45295 6.64726   3
 -12 -30   1 18.5093  8.1629   3
  11 -30  -1 -3.5457  4.9796   1
 -11 -30   1 1.77477 6.57165   3
  10 -30  -1 86.5352 10.5380   1
 -10 -30   1 63.5017 11.3168   3
  10  30  -1 69.9204 10.6258   3
  -9 -30   1 -6.9792  5.3672   3
   9 -30  -1 -3.2917  4.7276   2
   9 -30  -1 2.80496 4.54006   1
  -9  30   1 -0.8618  3.1073   3
   9  30  -1 4.97648 5.50790   3
   8 -30  -1 5.00229 4.32304   1
   8 -30  -1 2.05151 4.65435   2
  -8 -30   1 2.71648 5.75375   3
   8  30  -1 3.40009 4.98594   3
  -8  30   1 2.79436 3.21778   3
  -7 -30   1 6.96125 5.74025   3
   7 -30  -1 13.4928  4.5897   1
  -7  30   1 6.26158 3.37835   3
   7  30  -1 10.0973  4.8673   3
  -6 -30   1 33.7444  6.9278   1
   6 -30  -1 33.5217  5.8600   1
  -6  30   1 33.1922  5.7123   3
  -6  30   1 40.0326  5.2582   3
   6  30  -1 36.8132  6.3111   3
  -5 -30   1 15.3922  4.8592   1
   5 -30  -1 12.6031  4.1357   1
  -5  30   1 23.6786  3.8877   3
   5  30  -1 13.4379  4.5414   3
  -5  30   1 15.3472  4.3819   3
   4 -30  -1 1.39797 3.05022   5
   4 -30  -1 6.62620 3.43084   1
  -4 -30   1 6.91558 3.69150   1
  -4  30   1 4.82198 3.92096   3
   4  30  -1 0.87566 3.44221   3
  -4  30   1 7.50641 3.01341   3
  -3 -30   1 149.801  13.711   1
   3 -30  -1 131.138  13.461   1
   3 -30  -1 137.697  13.062   5
   3  30  -1 133.124  13.689   3
  -3  30   1 126.830  13.442   3
  -3  30   1 135.716  13.982   3
   2 -30  -1 3.48061 2.49145   5
   2 -30  -1 3.37304 2.76921   1
  -2 -30   1 -1.0938  2.7959   1
   2  30  -1 1.91096 2.80283   3
   2  30  -1 1.33897 3.04282   5
  -2  30   1 4.98505 2.95702   3
  -2  30   1 5.31533 4.01287   3
  -1 -30   1 75.4675  8.1238   1
   1 -30  -1 76.9689  8.2095   1
  -1  30   1 73.5662  8.9626   3
   1  30  -1 71.2027  8.1277   3
  -1  30   1 73.5387  8.4265   3
   1  30  -1 72.0573  8.0173   5
   0 -30  -1 -0.6152  2.6860   1
   0 -30   1 6.53009 2.89985   1
   0  30  -1 -0.8596  2.5060   5
   0  30   1 0.19363 2.21044   1
   0  30  -1 1.92406 3.31168   3
   0  30   1 0.63684 2.79279   3
   0  30  -1 4.23484 2.52062   3
  -1 -30  -1 3.47505 3.13161   1
   1 -30   1 3.55698 2.63160   1
  -1  30  -1 -0.1681  2.2768   3
   1  30   1 3.97670 3.19244   3
  -1  30  -1 1.46567 2.95154   3
   1  30   1 2.36726 2.37995   5
   1  30   1 2.09050 2.47838   1
   2 -30   1 -0.9375  2.3094   1
  -2 -30  -1 -0.5773  3.0976   1
   2 -30   1 -2.9614  2.3009   1
   2 -30   1 -0.3311  2.8502   5
   2  30   1 -1.0706  3.0031   3
  -2  30  -1 -1.8072  2.0584   3
   2  30   1 -1.0610  2.6167   1
  -2  30  -1 -6.4610  2.3964   3
  -3 -30  -1 85.9373 10.2363   1
   3 -30   1 105.875   9.895   1
   3 -30   1 85.6913  9.7816   5
   3 -30   1 101.957   9.866   1
   3  30   1 93.0420  9.8856   1
   3  30   1 89.8663 10.4571   3
   4 -30   1 -2.8455  3.1730   5
   4 -30   1 -4.9232  2.6378   1
  -4 -30  -1 -1.3841  3.7392   1
   4  30   1 -0.2957  3.5816   3
   4  30   1 -0.6660  2.8390   1
   5 -30   1 6.43463 3.43719   1
  -5 -30  -1 8.15601 4.67857   1
   5  30   1 2.55792 4.15830   3
   6 -30   1 13.4687  4.2161   1
   6  30   1 13.0629  5.0593   3
  -7 -30  -1 6.30527 5.21356   3
   7 -30   1 -6.5359  3.5029   1
   7  30   1 -3.6262  4.8918   3
   8 -30   1 66.1534  8.6002   1
  -8 -30  -1 63.4169 10.0387   3
   8  30   1 68.2786  9.7683   3
  -9 -30  -1 0.80489 5.39219   3
   9 -30   1 2.90628 4.11062   1
  10 -30   1 3.44146 4.36651   1
 -10 -30  -1 -0.8868  5.7328   3
  11 -30   1 0.14883 4.39722   1
 -11 -30  -1 8.62232 6.34196   3
 -11 -31   1 1.95669 6.67496   3
  11 -31  -1 11.4017  5.7782   1
 -10 -31   1 6.33651 6.60905   3
  10 -31  -1 4.62862 4.96173   1
  10  31  -1 -1.5473  5.7783   3
   9 -31  -1 23.1465  5.4856   1
  -9 -31   1 4.44371 6.15723   3
   9  31  -1 6.10343 5.76216   3
  -8 -31   1 -4.7868  5.4745   3
   8 -31  -1 7.94278 4.85656   2
   8 -31  -1 0.80490 4.29516   1
   8  31  -1 -0.1664  4.7736   3
  -8  31   1 7.30472 3.36854   3
  -7 -31   1 2.57293 5.56456   3
   7 -31  -1 6.33962 4.27185   1
   7  31  -1 4.99476 4.68994   3
  -7  31   1 -0.3679  3.2581   3
   6 -31  -1 5.07687 3.96027   1
  -6 -31   1 8.38222 5.00609   1
   6  31  -1 7.23937 4.64676   3
  -6  31   1 2.54179 3.21836   3
  -5 -31   1 8.17732 4.47460   1
   5 -31  -1 2.09416 3.45885   1
   5  31  -1 8.53959 4.12315   3
  -5  31   1 6.76222 4.01761   3
  -5  31   1 6.80072 3.36604   3
  -4 -31   1 47.2785  6.8946   1
   4 -31  -1 50.7009  6.1140   5
   4 -31  -1 56.5793  6.7123   1
  -4  31   1 36.4664  5.8159   3
   4  31  -1 42.4207  6.4473   3
  -4  31   1 56.2462  6.7998   3
   3 -31  -1 24.6358  4.5312   1
  -3 -31   1 24.4059  4.6939   1
   3 -31  -1 27.1531  4.0695   5
  -3  31   1 27.3430  4.2734   3
   3  31  -1 21.4670  4.3600   3
  -3  31   1 25.7293  5.1767   3
   2 -31  -1 26.6194  4.4264   1
   2 -31  -1 28.4497  3.9728   5
  -2 -31   1 26.3459  4.6093   1
  -2  31   1 23.5083  5.0746   3
   2  31  -1 24.8747  4.2103   3
  -2  31   1 26.6581  4.3372   3
   2  31  -1 14.4546  4.3022   5
   1 -31  -1 6.82563 3.07931   1
  -1 -31   1 1.62445 2.71653   1
  -1  31   1 -1.8032  3.9665   3
  -1  31   1 2.99868 3.04743   3
   1  31  -1 5.56825 2.87560   5
   1  31  -1 -1.4046  2.4836   3
   0 -31   1 3.03675 2.76453   1
   0 -31  -1 4.90738 3.04609   1
   0  31   1 9.49824 4.30947   3
   0  31  -1 3.61751 3.39717   3
   0  31  -1 7.38398 2.99525   5
   0  31   1 4.26389 3.11661   3
   0  31  -1 2.77356 2.54990   3
   0  31   1 0.40491 2.25373   1
   1 -31   1 2.80070 2.64691   1
  -1 -31  -1 -2.7592  2.8966   1
  -1  31  -1 0.78188 2.97722   3
   1  31   1 -0.1316  3.1515   3
   1  31   1 1.29370 2.54838   1
  -1  31  -1 3.37076 2.41166   3
   1  31   1 5.60219 2.45839   5
   2 -31   1 0.60388 2.41139   1
   2 -31   1 -2.1294  2.5442   1
  -2 -31  -1 0.77184 3.13647   1
   2 -31   1 -1.5448  2.7924   5
  -2  31  -1 0.08489 2.65704   3
  -2  31  -1 0.85517 2.21153   3
   2  31   1 -0.9902  2.9498   3
   2  31   1 -1.8782  2.7310   1
   3 -31   1 76.2246  8.0934   5
  -3 -31  -1 69.9609  8.4662   1
   3 -31   1 76.9677  8.1821   1
   3  31   1 70.3963  8.8163   3
   3  31   1 67.6316  8.1730   1
  -4 -31  -1 4.06278 4.13717   1
   4 -31   1 3.72541 3.22998   1
   4 -31   1 2.49424 3.54942   5
   4  31   1 2.14069 3.80134   3
   5 -31   1 10.4215  3.7426   1
  -5 -31  -1 13.9932  5.1145   1
   5  31   1 11.7208  4.8578   3
   6 -31   1 2.04084 3.57239   1
   6  31   1 5.44938 4.68934   3
  -7 -31  -1 4.71217 5.25253   3
   7 -31   1 5.26102 3.95248   1
   7  31   1 -0.0193  5.0038   3
  -8 -31  -1 13.6363  5.9488   3
   8 -31   1 14.2808  4.7736   1
   8  31   1 5.61999 5.79531   3
   9 -31   1 -3.3250  3.7618   1
  -9 -31  -1 2.97638 5.68140   3
  10 -31   1 15.2681  5.0071   1
 -10 -31  -1 -0.6127  6.0104   3
  11 -31   1 2.39525 4.66805   1
 -11 -31  -1 7.57575 6.33557   3
 -11 -32   1 1.24122 6.87399   3
  11 -32  -1 15.9048  6.1016   1
  10 -32  -1 -4.0373  4.7958   1
 -10 -32   1 3.18075 6.60879   3
  10  32  -1 2.44998 6.17479   3
   9 -32  -1 181.312  17.408   1
  -9 -32   1 176.311  19.002   3
   9  32  -1 146.941  17.809   3
   8 -32  -1 -0.4731  4.4609   1
  -8 -32   1 -6.5752  5.6028   3
   8 -32  -1 -0.2760  4.8755   2
   8  32  -1 1.36015 5.01138   3
  -8  32   1 -4.6692  2.9366   3
   7 -32  -1 -0.5349  4.0887   1
   7  32  -1 4.40616 4.69341   3
  -7  32   1 2.24274 3.25167   3
   6 -32  -1 1.50079 4.04553   1
  -6 -32   1 6.74083 4.98642   1
   6  32  -1 -0.0319  4.4253   3
  -6  32   1 0.67773 3.34463   3
   5 -32  -1 -0.4072  3.6445   1
  -5 -32   1 2.43181 4.19552   1
   5  32  -1 5.94905 4.23646   3
  -5  32   1 0.96736 3.17424   3
  -4 -32   1 124.878  12.522   1
   4 -32  -1 109.136  11.671   5
   4 -32  -1 144.795  12.433   1
  -4  32   1 107.283  12.407   3
  -4  32   1 111.180  11.915   3
   4  32  -1 108.814  12.401   3
   3 -32  -1 4.51937 3.32769   1
  -3 -32   1 1.27583 3.31195   1
   3 -32  -1 2.71937 2.97342   5
   3  32  -1 11.8359  3.6892   3
  -3  32   1 -2.0214  4.0317   3
  -3  32   1 14.0730  3.3975   3
   2 -32  -1 44.8211  6.0146   1
  -2 -32   1 49.7709  6.2067   1
   2  32  -1 35.1620  5.4988   3
   2  32  -1 44.2646  5.9076   5
  -2  32   1 43.6289  6.4044   3
  -2  32   1 36.8805  5.5343   3
  -1 -32   1 -3.5255  2.6888   1
   1 -32  -1 -0.3861  2.9390   1
  -1  32   1 1.10833 4.16954   3
   1  32  -1 2.04051 2.67379   3
   1  32  -1 5.10369 2.92513   5
  -1  32   1 5.84906 3.04323   3
   0 -32  -1 -0.2280  2.7765   1
   0 -32   1 3.55327 2.85142   1
   0  32  -1 6.09924 3.04071   5
   0  32  -1 -3.2029  2.3690   3
   0  32  -1 4.02218 3.51802   3
   0  32   1 -0.8447  2.9646   3
  -1 -32  -1 1.91178 3.12374   1
   1 -32   1 -1.6329  2.6250   1
  -1  32  -1 2.84921 2.43267   3
   1  32   1 -6.5835  2.8857   3
  -1  32  -1 2.35985 3.12599   3
   1  32   1 0.00817 2.43863   5
   2 -32   1 1.92951 3.15675   5
   2 -32   1 8.55632 3.21604   1
  -2 -32  -1 2.62665 3.38025   1
   2  32   1 2.03677 3.13575   5
  -2  32  -1 3.66927 2.30792   3
  -2  32  -1 4.68270 2.91031   3
   2  32   1 6.15310 3.39258   3
  -3 -32  -1 7.11113 3.97456   1
   3 -32   1 9.30073 3.51230   5
   3 -32   1 6.78029 3.21818   1
   3  32   1 -5.8051  3.6968   3
  -4 -32  -1 0.26953 3.91336   1
   4 -32   1 -1.1048  2.9507   1
   4 -32   1 7.13760 3.68535   5
   4  32   1 -6.6327  3.6393   3
  -5 -32  -1 1.23133 4.58089   1
   5 -32   1 1.34178 3.41374   1
   5 -32   1 10.7168  4.3927   5
   5  32   1 4.66919 4.52040   3
   6 -32   1 6.49531 3.80376   1
   6  32   1 1.79814 4.68658   3
  -7 -32  -1 8.52149 5.49415   3
   7 -32   1 11.9508  4.4466   1
   7  32   1 1.92711 5.33600   3
  -8 -32  -1 4.10710 5.64780   3
   8 -32   1 7.47231 4.23137   1
   8  32   1 1.93087 5.60538   3
   9 -32   1 41.6297  6.8941   1
  -9 -32  -1 34.5498  8.0671   3
 -10 -32  -1 2.60151 6.11019   3
  10 -32   1 2.62425 4.37561   1
 -11 -32  -1 5.50421 6.36418   3
  11 -32   1 6.52240 4.91304   1
 -11 -33   1 1.95029 7.31664   3
  11 -33  -1 2.51538 5.52460   1
 -10 -33   1 15.8285  7.4936   3
  10 -33  -1 34.7090  6.6286   1
  10  33  -1 13.7696  6.8406   3
   9 -33  -1 7.38675 4.95701   1
  -9 -33   1 6.06043 6.70201   3
   9  33  -1 5.20863 5.73055   3
   8 -33  -1 3.10167 4.56889   1
   8 -33  -1 -2.2018  4.7094   2
  -8 -33   1 -2.2079  5.7452   3
   8  33  -1 1.82513 5.20730   3
  -8  33   1 2.28613 3.30277   3
   7 -33  -1 -1.5982  4.2526   1
  -7  33   1 -0.0018  3.1442   3
   7  33  -1 4.29822 4.87216   3
  -6 -33   1 22.9655  5.8616   1
   6 -33  -1 5.96618 4.24596   1
  -6  33   1 12.9202  3.8291   3
   6  33  -1 17.7005  5.2234   3
  -5 -33   1 25.5147  5.8222   1
   5 -33  -1 17.9017  4.7614   1
  -5  33   1 27.1199  4.4696   3
   5  33  -1 22.7586  5.3970   3
   4 -33  -1 98.8276 10.8506   1
  -4 -33   1 95.6819 11.0894   1
   4 -33  -1 97.2310 10.3429   5
   4  33  -1 107.120  11.211   3
  -4  33   1 100.565  10.600   3
  -3 -33   1 43.6859  6.1388   1
   3 -33  -1 38.9843  5.1295   5
   3 -33  -1 34.3481  5.6443   1
  -3  33   1 37.7406  6.1292   3
   3  33  -1 35.2131  5.5729   3
  -3  33   1 36.7849  5.4443   3
   2 -33  -1 4.68498 3.08416   1
  -2 -33   1 -0.8603  3.1162   1
  -2  33   1 7.76984 3.39199   3
   2  33  -1 -0.3842  3.4241   5
   2  33  -1 5.31642 3.06117   3
   1 -33  -1 2.53172 3.14778   1
  -1 -33   1 2.56316 2.94276   1
  -1  33   1 3.16514 3.06036   3
   1  33  -1 1.12889 3.10756   5
   1  33  -1 -6.4041  2.4288   3
   0 -33  -1 2.28309 3.06134   1
   0 -33   1 3.18083 2.93834   1
   0  33  -1 3.96279 3.07269   5
   0  33  -1 6.01697 3.77105   3
   0  33  -1 4.79498 2.67080   3
   0  33   1 2.53323 3.17331   3
   1 -33   1 11.2653  3.2744   1
  -1 -33  -1 -0.1308  3.1124   1
  -1  33  -1 3.69161 3.29094   3
   1  33   1 1.62401 3.32604   3
   1  33   1 3.75925 2.68263   5
  -1  33  -1 1.64189 2.49608   3
   2 -33   1 0.27238 3.22144   5
  -2 -33  -1 -2.8286  3.1997   1
   2 -33   1 14.5338  3.4364   1
  -2  33  -1 2.09188 2.36605   3
   2  33   1 5.55144 3.27513   5
   2  33   1 8.58332 3.61016   3
  -2  33  -1 9.34796 3.09768   3
   3 -33   1 35.5960  5.2162   1
  -3 -33  -1 31.6983  5.7292   1
   3 -33   1 28.9172  5.1958   5
   3  33   1 28.1872  5.4677   3
  -4 -33  -1 12.5105  4.7474   1
   4 -33   1 15.7778  4.3874   5
   4 -33   1 8.73336 3.70689   1
   4  33   1 11.6950  4.6083   3
   5 -33   1 0.64559 3.39937   1
   5 -33   1 1.55361 4.21556   5
   5  33   1 5.01453 4.55028   3
   6 -33   1 -4.6373  3.4844   1
   6  33   1 0.88087 4.70477   3
   7 -33   1 6.87390 4.27648   1
   7  33   1 1.36221 4.93258   3
   8 -33   1 -0.0869  3.7663   1
  -8 -33  -1 2.48308 5.59536   3
   8  33   1 -0.8912  5.7785   3
  -9 -33  -1 2.50797 5.85584   3
   9 -33   1 9.31196 4.65690   1
 -10 -33  -1 31.8916  8.3704   3
  10 -33   1 43.8017  7.4358   1
  11 -33   1 5.77895 5.01135   1
 -11 -33  -1 7.71659 6.57057   3
 -11 -34   1 5.86053 7.25919   3
  11 -34  -1 2.84135 5.64548   1
 -10 -34   1 151.446  18.017   3
  10 -34  -1 158.426  16.589   1
  10  34  -1 153.003  17.332   3
   9 -34  -1 3.09471 5.04669   1
  -9 -34   1 3.65700 6.62720   3
   9  34  -1 -3.6321  5.4151   3
   8 -34  -1 4.50798 4.67401   1
  -8 -34   1 11.4476  6.4038   3
   8  34  -1 7.94288 5.52209   3
  -8  34   1 2.17829 3.30492   3
   7 -34  -1 4.20600 4.42660   1
   7  34  -1 -1.5072  4.6353   3
  -7  34   1 2.50596 3.33330   3
  -6 -34   1 3.78868 4.97887   1
   6 -34  -1 8.91231 4.18532   1
   6  34  -1 0.28436 4.61254   3
  -6  34   1 1.38101 3.30987   3
  -5 -34   1 18.5658  5.6499   1
   5 -34  -1 19.6941  4.8006   1
   5 -34  -1 22.5583  4.7831   5
   5  34  -1 16.0366  4.9357   3
  -5  34   1 17.3802  4.0472   3
   4 -34  -1 6.82340 3.81024   1
  -4 -34   1 9.98602 4.29937   1
   4 -34  -1 10.9763  3.8953   5
  -4  34   1 7.44965 3.56441   3
   4  34  -1 10.5919  4.0962   3
   3 -34  -1 32.4754  4.7669   5
  -3 -34   1 26.0608  5.4184   1
   3 -34  -1 35.2639  5.5032   1
   3  34  -1 27.3424  5.1759   3
  -3  34   1 34.1947  5.0925   3
   2 -34  -1 1.70270 3.24284   1
  -2 -34   1 -4.3107  3.0583   1
   2  34  -1 -0.5108  3.0314   3
  -2  34   1 0.92077 3.20853   3
   2  34  -1 -1.3708  3.6844   5
  -1 -34   1 0.23438 3.07407   1
   1 -34  -1 -0.6153  2.9771   1
   1  34  -1 0.89100 2.77056   3
   1  34  -1 0.51931 3.29743   5
   1  34  -1 0.25922 3.94352   3
  -1  34   1 0.97383 2.92979   3
   0 -34   1 -0.8780  2.7063   1
   0 -34  -1 -0.6197  2.9709   1
   0  34  -1 -0.0108  2.6024   3
   0  34   1 3.11365 3.30466   3
   0  34  -1 2.79088 3.97866   3
   1 -34   1 32.0291  4.7999   1
  -1 -34  -1 21.4582  4.8696   1
   1  34   1 29.9678  4.9715   3
  -1  34  -1 26.6103  4.0767   3
   1  34   1 24.6202  4.2016   5
  -1  34  -1 22.2274  4.4581   3
   2 -34   1 12.6907  3.8987   5
  -2 -34  -1 2.63144 3.74138   1
   2 -34   1 1.01531 3.12497   1
   2  34   1 -1.9381  3.2447   5
   2  34   1 7.41252 3.73375   3
  -2  34  -1 9.10491 2.61425   3
  -3 -34  -1 40.5592  6.3222   1
   3 -34   1 27.4747  5.4353   5
   3 -34   1 36.7531  5.4083   1
   3  34   1 26.7283  5.6829   3
   4 -34   1 6.56156 4.30796   5
   4 -34   1 10.4352  3.7875   1
  -4 -34  -1 8.67634 4.77885   1
   4  34   1 9.51997 4.55749   3
   5 -34   1 2.34032 3.47238   1
   5 -34   1 1.62958 4.30836   5
   5  34   1 8.28243 4.92456   3
   6 -34   1 27.7360  5.5611   1
   6  34   1 25.7072  6.1978   3
   7 -34   1 0.22400 3.96135   1
   7  34   1 2.82840 5.10237   3
   8 -34   1 3.16046 4.11335   1
  -8 -34  -1 -0.3917  5.6763   3
   8  34   1 1.93547 5.35721   3
  -9 -34  -1 -0.2635  5.7775   3
   9 -34   1 -3.7915  4.0315   1
 -10 -34  -1 57.7446 10.1234   3
  10 -34   1 59.3478  8.7399   1
 -11 -34  -1 -1.5349  6.3701   3
  11 -34   1 6.72500 5.34380   1
 -11 -35   1 8.70701 7.78335   3
  11 -35  -1 1.35440 5.69115   1
  11  35  -1 8.68030 7.08314   3
  10 -35  -1 4.53529 5.42865   1
  10  35  -1 9.21317 6.18428   3
   9 -35  -1 17.3441  5.6429   1
   9  35  -1 15.9131  6.3809   3
   8 -35  -1 -0.3888  4.4709   1
   8  35  -1 1.79241 5.02102   3
   7 -35  -1 -3.2571  4.1630   1
  -7  35   1 6.22476 3.38161   3
   7  35  -1 7.27009 4.93837   3
   6 -35  -1 1.23082 4.04253   1
   6  35  -1 4.05987 4.70305   3
  -6  35   1 -2.5492  3.1113   3
   5 -35  -1 28.1158  5.2936   5
   5 -35  -1 23.4790  5.3795   1
  -5 -35   1 24.6780  6.1033   1
  -5  35   1 18.2829  4.3647   3
   5  35  -1 30.9418  5.7548   3
  -4 -35   1 43.1734  7.3385   1
   4 -35  -1 54.8496  6.7126   5
   4 -35  -1 52.1365  7.1987   1
  -4  35   1 51.0416  6.5470   3
   4  35  -1 47.1001  6.9591   3
   3 -35  -1 17.5110  4.0148   5
   3 -35  -1 18.6345  4.5218   1
  -3 -35   1 13.2493  4.5662   1
  -3  35   1 13.7123  3.9769   3
   3  35  -1 17.5030  4.5009   3
  -2 -35   1 -3.7052  3.3253   1
   2 -35  -1 0.18186 3.26501   1
   2  35  -1 2.12861 3.77873   5
   2  35  -1 1.13336 3.17115   3
  -2  35   1 -2.4601  3.1926   3
  -1 -35   1 -3.8160  3.0614   1
   1 -35  -1 3.47671 3.28938   1
   1  35  -1 -3.8126  3.9466   3
   1  35  -1 -1.9951  2.8604   3
   1  35  -1 1.73190 3.53585   5
  -1  35   1 1.34872 3.24951   3
   0 -35   1 1.42525 3.14966   1
   0 -35  -1 6.23718 3.56365   1
   0  35   1 4.84858 3.50985   3
   0  35  -1 8.05611 4.07909   3
   0  35  -1 2.29909 2.91317   3
   1 -35   1 -0.5943  2.8389   1
  -1 -35  -1 5.11020 3.62686   1
   1  35   1 -1.5312  3.4544   3
  -1  35  -1 -2.7152  2.5406   3
   1  35   1 -0.1998  2.8320   5
  -1  35  -1 1.75400 3.40639   3
  -2 -35  -1 7.65766 4.10362   1
   2 -35   1 3.01229 3.27637   1
   2 -35   1 2.70242 3.69903   5
  -2  35  -1 5.14873 3.15697   3
   2  35   1 7.58361 4.02310   3
  -2  35  -1 6.23546 2.55721   3
   2  35   1 4.58693 3.44454   5
  -3 -35  -1 24.3548  5.5956   1
   3 -35   1 22.7242  4.6489   1
   3 -35   1 23.5995  4.9922   5
   3  35   1 24.6767  5.2236   3
  -4 -35  -1 5.81427 4.78707   1
   4 -35   1 14.2380  4.2251   1
   4 -35   1 23.1724  4.8360   5
   4  35   1 4.75390 4.55841   3
   5 -35   1 2.83110 3.63000   1
   5 -35   1 4.86492 4.59254   5
   5  35   1 7.08307 4.76348   3
   6 -35   1 -0.4400  4.8411   5
   6 -35   1 2.02747 3.90395   1
   6  35   1 -2.6916  4.8423   3
   7  35   1 17.5933  5.9582   3
   8 -35   1 -1.7651  4.0031   1
  -8 -35  -1 6.00675 5.80669   3
   8  35   1 2.37971 5.62689   3
   9 -35   1 -3.5010  4.1398   1
  -9 -35  -1 6.21509 6.17703   3
 -10 -35  -1 14.1268  6.9574   3
  10 -35   1 12.5623  5.1049   1
 -11 -35  -1 4.42481 6.95359   3
  11  36  -1 -1.3321  6.7349   3
  10 -36  -1 -1.2429  5.0954   1
  10  36  -1 2.66299 6.28025   3
   9 -36  -1 138.812  14.262   1
   9  36  -1 112.613  14.423   3
   8 -36  -1 1.38744 4.78926   1
  -8  36   1 5.97972 3.27178   3
   8  36  -1 1.35398 5.28499   3
   7 -36  -1 31.0071  6.1294   1
  -7  36   1 26.6243  4.6213   3
   7  36  -1 20.7382  6.0756   3
   6 -36  -1 -4.8519  4.0279   1
   6  36  -1 -7.2461  4.3784   3
  -6  36   1 -0.5439  3.2096   3
  -5 -36   1 1.29227 4.65923   1
   5 -36  -1 -0.2549  3.9153   1
   5 -36  -1 2.72508 4.25643   5
   5  36  -1 4.30500 4.56679   3
  -5  36   1 10.2366  3.6393   3
   4 -36  -1 112.182  11.507   1
   4 -36  -1 100.161  10.773   5
  -4 -36   1 109.488  11.795   1
  -4  36   1 93.4453 10.9690   3
   4  36  -1 105.093  11.455   3
   3 -36  -1 0.85547 3.52866   1
   3 -36  -1 3.15745 3.49620   5
  -3 -36   1 1.97108 3.82379   1
  -3  36   1 12.9854  3.8043   3
   3  36  -1 4.50035 3.78220   3
  -2 -36   1 19.2971  4.5566   1
   2 -36  -1 9.85557 4.19173   1
  -2  36   1 8.27779 3.69137   3
   2  36  -1 9.15615 4.31917   5
   2  36  -1 16.0128  3.9439   3
   1 -36  -1 -2.2946  3.1572   1
  -1 -36   1 -2.1252  3.2535   1
   1  36  -1 0.42836 3.06582   3
  -1  36   1 -1.5248  3.2034   3
   1  36  -1 -1.2103  3.6494   5
   0 -36  -1 87.3746  9.4958   1
   0 -36   1 81.2797  9.2534   1
   0  36  -1 87.8046  9.7492   3
   0  36  -1 84.1116  9.0565   3
   0  36   1 78.0307  9.6215   3
   1 -36   1 0.97323 3.22490   1
  -1 -36  -1 -3.4717  3.4965   1
   1  36   1 4.46804 3.06823   5
  -1  36  -1 0.00436 3.47342   3
  -1  36  -1 -1.0708  2.6630   3
   1  36   1 -5.9056  3.3437   3
   2 -36   1 78.8925  8.3244   1
  -2 -36  -1 81.0741  9.0295   1
   2  36   1 67.2558  8.1394   5
   2  36   1 70.7310  8.9822   3
  -2  36  -1 63.9032  7.5924   3
  -3 -36  -1 2.97290 4.40635   1
   3 -36   1 5.97298 3.65613   1
   3 -36   1 5.84006 4.18100   5
   3  36   1 7.64017 4.49536   3
   4 -36   1 3.45971 3.80175   1
  -4 -36  -1 8.97652 5.05048   1
   4 -36   1 8.38247 4.54697   5
   4  36   1 18.3586  5.0175   3
   5 -36   1 16.9821  4.4877   1
   5 -36   1 18.9535  5.4534   5
   5  36   1 9.55672 5.23072   3
   6 -36   1 -0.9969  3.8343   1
   6 -36   1 -3.0942  4.9601   5
   6  36   1 -3.0100  4.9278   3
   7 -36   1 301.968  29.183   1
   7  36   1 316.581  30.262   3
  -8 -36  -1 -1.2119  5.6370   3
   8 -36   1 0.42803 4.26244   1
   8  36   1 14.1084  5.9807   3
   9 -36   1 32.8245  6.9066   1
  -9 -36  -1 49.8869  9.0867   3
  10 -36   1 1.81781 4.73569   1
 -10 -36  -1 0.33186 6.14818   3
  10 -37  -1 1.10531 5.44661   1
  10  37  -1 13.5538  6.8855   3
   9 -37  -1 7.35444 5.46135   1
   9  37  -1 12.1894  6.0201   3
   8 -37  -1 21.3334  5.8309   1
   8  37  -1 18.2748  6.1500   3
   7 -37  -1 26.8710  5.8001   1
   7  37  -1 30.6541  6.2109   3
  -7  37   1 23.3285  4.5652   3
   6 -37  -1 0.70584 4.11716   1
  -6  37   1 1.22649 3.38865   3
   6  37  -1 -5.5594  4.3773   3
   5 -37  -1 6.04939 4.47834   1
  -5 -37   1 -4.9199  4.3710   1
  -5  37   1 1.94387 3.46250   3
   5  37  -1 2.02052 4.41520   3
   4 -37  -1 75.0863  9.7045   1
  -4 -37   1 80.7935 10.0687   1
  -4  37   1 82.4857  9.3976   3
   4  37  -1 93.4172  9.9982   3
  -3 -37   1 -3.3170  3.7000   1
   3 -37  -1 2.11837 3.70717   1
   3  37  -1 5.79801 3.96773   3
  -3  37   1 -0.0633  3.4191   3
   2 -37  -1 9.12686 4.12952   1
  -2 -37   1 8.05794 4.22027   1
  -2  37   1 7.21814 3.68596   3
   2  37  -1 18.5134  4.1800   3
   1 -37  -1 13.4534  4.1974   1
  -1 -37   1 8.45372 4.01680   1
  -1  37   1 7.54921 3.76122   3
   1  37  -1 6.39055 3.48948   3
   1  37  -1 12.4252  4.2768   5
   0 -37   1 0.46665 3.18400   1
   0 -37  -1 -0.7830  3.5101   1
   0  37   1 3.64501 3.82727   3
   0  37  -1 -2.8695  2.8443   3
   0  37  -1 0.53396 4.16625   3
  -1 -37  -1 2.71755 3.83571   1
   1 -37   1 4.47423 3.47174   1
  -1  37  -1 4.40247 3.74896   3
  -1  37  -1 5.16050 2.86439   3
   1  37   1 6.81406 3.83752   3
   1  37   1 3.07083 3.31104   5
  -2 -37  -1 112.347  12.908   1
   2 -37   1 104.557  12.328   1
   2  37   1 134.352  13.259   3
  -2  37  -1 129.266  11.962   3
   3 -37   1 5.33714 3.78593   1
   3 -37   1 11.3326  4.5301   5
  -3 -37  -1 7.64980 4.55234   1
   3  37   1 5.33100 4.45790   3
   4 -37   1 21.8421  5.3488   5
   4 -37   1 26.7320  5.1100   1
  -4 -37  -1 25.4350  5.9770   1
   4  37   1 10.6091  5.2337   3
   5 -37   1 2.98024 4.90818   5
   5 -37   1 9.21650 4.29235   1
   5  37   1 -1.3887  4.6887   3
   6 -37   1 8.52866 4.35034   1
   6 -37   1 7.43614 5.52453   5
   6  37   1 11.4088  5.3228   3
   7 -37   1 31.0060  5.7531   1
   7  37   1 17.8773  6.3009   3
   8 -37   1 0.06454 4.37947   1
  -8 -37  -1 2.13898 5.91978   3
   8  37   1 -4.1541  5.2775   3
   9 -37   1 0.42963 4.49778   1
  -9 -37  -1 8.99261 6.66846   3
 -10 -37  -1 4.42963 6.63314   3
  10 -37   1 8.73408 5.05750   1
  10 -38  -1 60.0003  9.7428   1
  10  38  -1 54.6568  9.8702   3
   9 -38  -1 -1.8625  5.0533   1
   9  38  -1 2.13611 5.63522   3
   8 -38  -1 44.6063  7.1976   1
   8  38  -1 20.7168  6.5504   3
   7 -38  -1 9.23827 5.02546   1
   7  38  -1 3.60263 4.94403   3
  -7  38   1 6.90361 3.55211   3
   6 -38  -1 -1.0249  4.2714   1
  -6  38   1 -2.5670  3.2754   3
   6  38  -1 -3.0836  4.5698   3
   5 -38  -1 -3.7261  3.9859   1
  -5 -38   1 -8.3684  4.3936   1
   5  38  -1 7.81490 4.82252   3
  -5  38   1 2.36555 3.44139   3
  -4 -38   1 3.74634 4.60893   1
   4 -38  -1 11.7762  4.6382   1
   4  38  -1 9.03977 4.61684   3
  -4  38   1 9.71908 3.87558   3
  -3 -38   1 26.7894  5.5904   1
   3 -38  -1 17.1654  5.1582   1
   3  38  -1 25.2712  5.1121   3
  -3  38   1 18.5620  4.4476   3
   2 -38  -1 4.46823 3.96839   1
  -2 -38   1 1.15049 3.89423   1
  -2  38   1 1.74863 3.56257   3
   2  38  -1 3.05453 3.71904   3
  -1 -38   1 172.640  16.603   1
   1 -38  -1 177.226  16.676   1
  -1  38   1 160.334  16.644   3
   1  38  -1 167.137  16.550   5
   1  38  -1 156.895  16.374   3
   0 -38  -1 -2.8740  3.4669   1
   0 -38   1 5.36870 3.61021   1
   0  38  -1 -3.7063  2.8994   3
   0  38   1 3.57405 3.62675   3
   1 -38   1 58.0614  7.2842   1
  -1 -38  -1 55.5434  7.9015   1
  -1  38  -1 63.7292  6.7818   3
  -1  38  -1 51.1100  7.0119   3
   1  38   1 47.6535  7.2537   3
  -2 -38  -1 20.4982  5.2203   1
   2 -38   1 7.16856 4.10934   1
   2  38   1 17.1960  4.7019   3
  -3 -38  -1 13.8654  5.0037   1
   3 -38   1 13.7233  4.8727   5
   3 -38   1 14.3030  4.3709   1
   3  38   1 6.04852 4.26990   3
   4 -38   1 19.0295  5.3926   5
   4 -38   1 20.3956  4.9512   1
   4  38   1 15.3815  5.3709   3
   5 -38   1 0.51294 3.75543   1
   5 -38   1 -1.5718  4.7949   5
   5  38   1 4.21756 5.10312   3
   6 -38   1 14.4852  4.8615   1
   6 -38   1 13.5791  5.9533   5
   6  38   1 3.51198 5.09785   3
   7 -38   1 1.24527 6.06842   5
   7 -38   1 4.55900 4.18601   1
   7  38   1 4.33371 5.47016   3
  -8 -38  -1 1.29900 6.06021   3
   8 -38   1 3.87365 4.57295   1
   8  38   1 8.04442 5.79293   3
   9 -38   1 -4.3311  4.3122   1
  -9 -38  -1 -3.7207  6.1948   3
   9  38   1 3.25442 6.45417   3
  10 -38   1 35.4905  6.6257   1
 -10 -38  -1 10.5409  7.5853   3
  10 -39  -1 6.03503 6.11301   1
  10  39  -1 6.69627 6.96462   3
   9 -39  -1 -5.4579  5.0334   1
   9  39  -1 4.01955 5.90834   3
   8 -39  -1 3.09252 4.88428   1
   8  39  -1 -4.8658  5.0412   3
   7 -39  -1 19.9281  5.7003   1
   7  39  -1 19.4290  5.8244   3
   6 -39  -1 1.08005 4.66534   1
   6  39  -1 -1.3860  4.6291   3
  -6  39   1 2.20066 3.50582   3
   5 -39  -1 -1.0131  4.2830   1
  -5 -39   1 5.24071 5.24859   1
  -5  39   1 -3.3886  3.3744   3
   5  39  -1 -4.9113  4.2866   3
  -4 -39   1 0.84157 4.52358   1
   4 -39  -1 3.47973 4.29931   1
   4  39  -1 3.00458 4.23983   3
  -4  39   1 0.15737 3.41196   3
  -3 -39   1 12.8870  4.8579   1
   3 -39  -1 22.1976  5.0763   1
  -3  39   1 10.0884  3.9328   3
   3  39  -1 8.75772 4.43883   3
  -2 -39   1 32.3245  5.9942   1
   2 -39  -1 35.3514  5.8667   1
  -2  39   1 29.6875  5.2669   3
   2  39  -1 26.4622  5.3451   3
  -1 -39   1 0.90967 3.79416   1
   1 -39  -1 13.2352  4.1544   1
  -1  39   1 -4.1627  3.5064   3
   1  39  -1 0.94192 3.30710   3
   0 -39   1 10.0380  4.1638   1
   0 -39  -1 12.9860  4.4853   1
   0  39  -1 2.91913 3.27888   3
   0  39   1 12.7087  4.1787   3
   1 -39   1 12.6067  4.3800   1
  -1 -39  -1 20.3852  5.2324   1
   1  39   1 16.9395  4.6989   3
  -1  39  -1 20.9294  3.7116   3
  -1  39  -1 15.8833  4.4410   3
   2 -39   1 15.1073  4.4618   1
  -2 -39  -1 8.35171 5.02354   1
   2  39   1 15.6697  4.9592   3
   3 -39   1 29.1889  5.7744   5
   3 -39   1 24.4122  5.2814   1
  -3 -39  -1 24.6080  6.1130   1
   3  39   1 23.6732  5.6139   3
   4 -39   1 4.86617 4.87006   5
   4 -39   1 4.19485 3.98244   1
   4  39   1 -9.7811  4.0393   3
   5 -39   1 5.16916 5.02876   5
   5 -39   1 2.08200 3.74077   1
   5  39   1 0.98287 5.03672   3
   6 -39   1 4.87079 4.29568   1
   6  39   1 4.03704 5.08682   3
   7 -39   1 30.5957  5.9483   1
   7  39   1 28.8357  7.1109   3
  -8 -39  -1 -13.815   5.482   3
   8 -39   1 -2.6769  4.4513   1
   8  39   1 2.80555 5.83789   3
   9 -39   1 3.11660 4.80443   1
  -9 -39  -1 2.31463 6.70675   3
   9  39   1 -8.0808  5.9954   3
  10 -39   1 17.5642  6.0461   1
 -10 -39  -1 9.16882 7.35947   3
  10 -40  -1 2.96495 5.80425   1
  10  40  -1 -10.501   6.415   3
   9 -40  -1 0.82220 5.25885   1
   9  40  -1 7.17046 6.23977   3
   8 -40  -1 4.87951 5.07626   1
   8  40  -1 -5.5026  5.1872   3
   7 -40  -1 80.0692  9.3730   1
   7  40  -1 51.3445  8.8744   3
   6 -40  -1 4.03050 4.68808   1
   6  40  -1 -1.6705  4.6207   3
  -6  40   1 7.15241 3.50139   3
  -5 -40   1 11.5552  5.5593   1
   5 -40  -1 4.21429 4.60465   1
  -5  40   1 7.05720 3.63675   3
   5  40  -1 -3.3489  4.5352   3
   4 -40  -1 4.48704 4.54497   1
  -4 -40   1 9.89769 5.16182   1
   4  40  -1 1.39373 4.21552   3
  -4  40   1 4.29509 3.39289   3
  -3 -40   1 2.15674 4.38200   1
   3 -40  -1 -3.6251  3.9022   1
  -3  40   1 0.73221 3.42467   3
   3  40  -1 5.32716 4.13548   3
   2 -40  -1 148.022  15.469   1
  -2 -40   1 138.461  15.445   1
   2  40  -1 152.807  15.402   3
  -2  40   1 162.342  15.409   3
  -1 -40   1 4.83642 4.10090   1
   1 -40  -1 7.18463 4.21010   1
  -1  40   1 0.17072 3.72873   3
   1  40  -1 -3.8809  3.3462   3
   0 -40   1 17.0928  4.5176   1
   0 -40  -1 10.7711  4.5357   1
   0  40  -1 10.5374  3.6820   3
   0  40   1 8.59856 4.24529   3
   1 -40   1 -0.3247  3.5776   1
  -1 -40  -1 -2.8721  4.0476   1
  -1  40  -1 3.94524 3.90768   3
   1  40   1 -2.7603  3.9567   3
  -1  40  -1 -1.0076  2.9035   3
   2 -40   1 26.1905  5.5706   1
  -2 -40  -1 33.7317  6.6339   1
   2  40   1 35.8835  6.1149   3
  -3 -40  -1 13.0287  5.2940   1
   3 -40   1 3.35593 4.81108   5
   3 -40   1 10.0320  4.2947   1
   3  40   1 10.5991  4.7408   3
   4 -40   1 1.03898 4.86012   5
   4 -40   1 3.57971 3.98279   1
   4  40   1 -3.3055  4.6758   3
   5 -40   1 3.41675 4.13682   1
   5  40   1 13.5523  5.2798   3
   6 -40   1 5.78887 4.39730   1
   6  40   1 0.51749 5.03678   3
   7 -40   1 93.7028 11.1700   1
   7  40   1 102.097  12.587   3
   8 -40   1 1.26646 4.32091   1
  -8 -40  -1 -0.9113  6.0820   3
   8  40   1 -1.1826  5.7132   3
  -9 -40  -1 16.6731  7.6423   3
   9 -40   1 14.1853  5.6605   1
   9  40   1 6.31580 6.78123   3
   9 -41  -1 0.73841 5.22685   1
   9  41  -1 -0.8529  5.8373   3
   8 -41  -1 -4.1283  4.9328   1
   8  41  -1 2.04122 5.41786   3
   7 -41  -1 36.7436  6.9795   1
   7  41  -1 17.0901  6.1274   3
   6 -41  -1 14.3887  5.3142   1
  -6  41   1 11.8936  3.5774   3
   6  41  -1 4.08000 4.96830   3
  -5 -41   1 10.6351  5.6242   1
   5 -41  -1 14.5756  5.3258   1
  -5  41   1 19.2587  4.1294   3
   5  41  -1 18.5783  5.4210   3
   4 -41  -1 18.1232  5.3192   1
  -4 -41   1 16.0533  5.6526   1
   4  41  -1 11.0404  4.9064   3
  -4  41   1 14.2436  4.0271   3
  -3 -41   1 33.0698  6.0957   1
   3 -41  -1 12.3184  5.0910   1
  -3  41   1 22.5208  4.6371   3
   3  41  -1 17.6343  4.8452   3
  -2 -41   1 4.56771 4.41900   1
   2 -41  -1 7.61646 4.57718   1
  -2  41   1 15.3616  4.2541   3
   2  41  -1 9.23369 4.06161   3
   1 -41  -1 6.31481 4.14181   1
  -1 -41   1 0.03467 4.16539   1
   1  41  -1 -2.1561  3.4418   3
  -1  41   1 1.48251 3.72235   3
   0 -41  -1 4.26132 4.42660   1
   0 -41   1 3.51362 3.96114   1
   0  41  -1 5.09616 3.35838   3
   0  41   1 1.29720 3.79788   3
  -1 -41  -1 6.78038 4.93176   1
   1 -41   1 17.5669  4.7713   1
   1  41   1 16.1509  5.0213   3
  -1  41  -1 8.78901 3.37747   3
  -1  41  -1 13.8527  4.2953   3
   2 -41   1 5.20865 4.11179   1
  -2 -41  -1 2.92779 4.75913   1
   2  41   1 6.87246 4.62392   3
  -3 -41  -1 37.1890  6.9418   1
   3 -41   1 34.1306  6.0329   1
   3  41   1 25.8173  6.1132   3
   4 -41   1 11.9784  4.8801   1
   4  41   1 24.0293  5.9699   3
   5 -41   1 3.84181 4.20330   1
   5  41   1 2.24541 4.93904   3
   6 -41   1 11.1614  4.7230   1
   6  41   1 6.35048 5.22577   3
   7 -41   1 5.17931 4.39102   1
   7  41   1 -3.4985  5.3814   3
  -8 -41  -1 1.84016 6.40093   3
   8 -41   1 6.70532 4.83512   1
   8  41   1 9.07156 6.36127   3
   9 -41   1 2.32836 4.74858   1
  -9 -41  -1 -4.1003  6.8394   3
   9  41   1 -3.6414  6.2604   3
   9 -42  -1 -1.7997  5.4812   1
   9  42  -1 -4.7589  5.7742   3
   8 -42  -1 -0.2425  5.0007   1
   8  42  -1 5.65840 5.73420   3
   7 -42  -1 11.0002  5.5951   1
   7  42  -1 -4.4297  4.8960   3
   6 -42  -1 7.40773 5.10321   1
  -6  42   1 8.86449 3.64459   3
   6  42  -1 -1.9280  4.7996   3
   5 -42  -1 39.2036  6.5472   1
  -5  42   1 13.1035  4.1596   3
   5  42  -1 20.7294  5.7277   3
  -4 -42   1 12.9024  5.7601   1
   4 -42  -1 15.2137  5.1798   1
  -4  42   1 24.4427  4.4116   3
   4  42  -1 9.89012 4.87789   3
  -3 -42   1 16.3986  5.3735   1
   3 -42  -1 8.18359 4.73018   1
   3  42  -1 11.8756  4.4712   3
  -3  42   1 12.5336  4.0384   3
   2 -42  -1 0.60450 4.34481   1
  -2 -42   1 7.28297 4.73850   1
   2  42  -1 -5.1947  3.7175   3
  -2  42   1 1.87322 3.73498   3
   1 -42  -1 8.71086 4.73774   1
  -1 -42   1 10.7062  4.6998   1
  -1  42   1 11.9066  4.2188   3
   1  42  -1 14.5971  4.2022   3
   0 -42   1 5.05657 4.14237   1
   0 -42  -1 5.68554 4.45291   1
   0  42   1 -1.4698  4.0153   3
   0  42  -1 -3.0320  3.2797   3
   1 -42   1 10.1924  4.2851   1
  -1 -42  -1 8.69605 4.85412   1
   1  42   1 19.6339  5.0244   3
  -1  42  -1 12.4541  3.5464   3
  -2 -42  -1 0.18599 4.57412   1
   2 -42   1 7.51562 4.20827   1
   2  42   1 -0.2359  4.3580   3
  -3 -42  -1 51.9380  8.2475   1
   3 -42   1 53.4302  7.4407   1
   3  42   1 48.1394  7.7177   3
   4 -42   1 15.5113  4.8847   1
   4  42   1 7.06861 5.26207   3
   5 -42   1 0.69439 4.27116   1
   5  42   1 5.68041 5.14653   3
   6 -42   1 83.0263  9.7996   1
   6  42   1 72.9114 10.4501   3
   7 -42   1 2.38686 4.49160   1
   7  42   1 -3.0322  5.3671   3
   8 -42   1 -1.8820  4.3791   1
   8  42   1 1.01900 5.84178   3
  -9 -42  -1 2.22357 7.29187   3
   9 -42   1 -4.1985  4.5654   1
   9  42   1 0.35576 6.46034   3
   9 -43  -1 -9.2861  5.3829   1
   9  43  -1 12.1469  6.4243   3
   8 -43  -1 -4.5441  5.1156   1
   8  43  -1 0.16164 5.60669   3
   7 -43  -1 1.85193 5.18883   1
   7  43  -1 0.23418 5.29823   3
   6 -43  -1 0.88479 4.90619   1
  -6  43   1 -1.4277  3.2707   3
   6  43  -1 0.17990 4.70442   3
   5 -43  -1 89.3835 10.3074   1
   5  43  -1 83.4255 10.0338   3
  -5  43   1 68.2714  8.6882   3
  -4 -43   1 43.1889  8.1687   1
   4 -43  -1 46.3974  7.7479   1
  -4  43   1 52.6816  6.6694   3
   4  43  -1 50.1259  7.4663   3
  -3 -43   1 -0.0168  4.5392   1
   3 -43  -1 -4.3060  4.1361   1
   3  43  -1 5.55042 4.24823   3
  -3  43   1 -8.5799  3.2713   3
  -2 -43   1 3.80185 4.56762   1
   2 -43  -1 6.83675 4.70763   1
  -2  43   1 7.45672 3.95744   3
   2  43  -1 8.66061 4.06822   3
  -1 -43   1 4.89029 4.26622   1
   1 -43  -1 0.84566 4.41346   1
   1  43  -1 -0.1218  3.4870   3
  -1  43   1 -3.8503  3.6146   3
   0 -43   1 0.12099 3.99216   1
   0 -43  -1 2.96130 4.45349   1
   0  43  -1 -3.7248  3.1249   3
   0  43   1 -5.7533  3.9696   3
  -1 -43  -1 15.8349  5.3796   1
   1 -43   1 4.87747 4.46860   1
  -1  43  -1 9.33078 3.43127   3
   1  43   1 11.0631  4.6609   3
  -2 -43  -1 16.7486  5.4467   1
   2 -43   1 13.5959  4.7908   1
   2  43   1 12.9841  4.9736   3
   3 -43   1 92.3456 10.9526   1
   3  43   1 103.628  11.667   3
   4 -43   1 5.88539 4.37122   1
   4  43   1 5.00001 5.06023   3
   5 -43   1 45.3972  6.8023   1
   5  43   1 23.1826  6.5324   3
   6 -43   1 30.3946  5.9811   1
   6  43   1 19.2553  6.4291   3
   7 -43   1 0.63662 4.51505   1
   7  43   1 3.91284 5.78131   3
   8 -43   1 2.96389 4.77093   1
   8  43   1 -6.7557  5.8628   3
   9 -43   1 2.63866 5.22179   1
   9  43   1 1.16668 6.88261   3
   9  44  -1 -4.9356  5.7573   3
   8 -44  -1 -0.7450  5.3693   1
   8  44  -1 1.85789 5.66370   3
   7 -44  -1 3.22037 5.49392   1
   7  44  -1 11.7842  5.4465   3
   6 -44  -1 2.67854 5.25108   1
   6  44  -1 8.31798 5.07176   3
  -6  44   1 -1.4170  3.2396   3
   5 -44  -1 50.1656  7.8108   1
   5  44  -1 38.9944  6.9019   3
  -5  44   1 37.0011  5.6960   3
  -4 -44   1 8.95151 5.22973   1
   4 -44  -1 14.3148  5.4654   1
  -4  44   1 4.19372 3.72813   3
   4  44  -1 10.3002  4.7633   3
  -3 -44   1 -6.4944  4.4435   1
   3 -44  -1 -0.3430  4.5434   1
  -3  44   1 -3.6462  3.5322   3
   3  44  -1 5.52013 4.22581   3
  -2 -44   1 2.93321 4.50783   1
   2 -44  -1 -0.6714  4.4631   1
  -2  44   1 2.47214 3.77020   3
   2  44  -1 9.82335 4.02478   3
   1 -44  -1 -4.7161  4.1360   1
  -1 -44   1 -3.5173  3.9531   1
   1  44  -1 -1.1453  3.5083   3
  -1  44   1 7.79887 4.02950   3
   0 -44   1 4.61155 4.52339   1
   0 -44  -1 6.26340 4.94286   1
   0  44   1 10.6470  4.7040   3
   0  44  -1 6.85885 3.76230   3
   1 -44   1 -3.5650  3.8333   1
  -1 -44  -1 -2.3945  4.5171   1
   1  44   1 1.27458 4.41307   3
  -1  44  -1 2.10057 3.24824   3
  -2 -44  -1 50.8585  8.1568   1
   2 -44   1 45.2729  7.2671   1
   2  44   1 51.5052  7.5827   3
   3 -44   1 30.6406  6.0739   1
   3  44   1 22.2907  6.0407   3
   4 -44   1 6.45253 4.57292   1
   4  44   1 9.39161 5.16065   3
   5 -44   1 38.8651  7.0587   1
   5  44   1 37.9072  7.2389   3
   6 -44   1 -0.3650  4.3256   1
   6  44   1 2.10281 5.54792   3
   7 -44   1 6.28168 5.00128   1
   7  44   1 2.58555 5.75519   3
   8 -44   1 3.91240 4.97821   1
   8  44   1 -4.9864  6.1989   3
   8 -45  -1 4.79602 5.98915   1
   8  45  -1 2.02872 5.64604   3
   7 -45  -1 8.66922 5.73339   1
   7  45  -1 10.9528  5.6036   3
   6 -45  -1 -4.2714  5.0299   1
   6  45  -1 2.62176 5.05338   3
   5 -45  -1 43.6580  7.3712   1
   5  45  -1 17.3368  5.8724   3
  -5  45   1 30.7818  4.8041   3
   4 -45  -1 2.03377 4.89949   1
  -4 -45   1 5.02983 5.13946   1
  -4  45   1 -0.2572  3.4954   3
   4  45  -1 2.45442 4.59413   3
   3 -45  -1 -1.4849  4.5586   1
  -3 -45   1 -0.0490  4.9705   1
  -3  45   1 -1.1662  3.4898   3
   3  45  -1 -1.8155  4.0417   3
  -2 -45   1 0.96327 4.75092   1
   2 -45  -1 11.3083  5.0851   1
  -2  45   1 3.34762 3.87433   3
   2  45  -1 1.15622 3.88845   3
   1 -45  -1 7.08241 4.73330   1
  -1 -45   1 4.37953 4.63060   1
   1  45  -1 4.16639 3.69828   3
  -1  45   1 7.56374 4.26814   3
   0 -45   1 -0.3809  4.0912   1
   0 -45  -1 -4.6872  4.3873   1
   0  45  -1 -3.2571  3.3354   3
   0  45   1 -0.9353  4.2891   3
   1 -45   1 8.20747 4.79147   1
  -1 -45  -1 20.8946  5.9754   1
   1  45   1 6.97677 4.79663   3
  -1  45  -1 14.8172  3.7673   3
   2 -45   1 36.5868  6.7859   1
  -2 -45  -1 45.6000  7.6945   1
   2  45   1 38.0398  6.8663   3
   3 -45   1 44.4195  7.6084   1
   3  45   1 54.1100  7.9216   3
   4 -45   1 1.39745 4.37800   1
   4  45   1 1.88867 5.13748   3
   5 -45   1 6.59689 4.65989   1
   5  45   1 6.81986 5.52965   3
   6 -45   1 -3.4204  4.2472   1
   6  45   1 2.74000 5.53238   3
   7 -45   1 -1.7286  4.5597   1
   7  45   1 -0.6033  5.7150   3
   8 -45   1 1.81770 4.91686   1
   8  45   1 -0.8506  6.4576   3
   8 -46  -1 27.6960  7.4736   1
   8  46  -1 21.6697  6.9179   3
   7 -46  -1 10.7496  6.1001   1
   7  46  -1 -1.0741  5.2310   3
   6 -46  -1 -0.6682  5.2302   1
   6  46  -1 4.12461 5.13132   3
   5 -46  -1 -1.4073  5.1477   1
  -5  46   1 14.8822  3.8846   3
   5  46  -1 3.96865 4.70304   3
   4 -46  -1 0.09475 4.96815   1
  -4  46   1 6.49119 3.79504   3
   4  46  -1 4.02603 4.56744   3
   3 -46  -1 2.62340 4.97916   1
  -3 -46   1 -3.0849  4.8461   1
   3  46  -1 -1.9751  4.1374   3
  -3  46   1 1.99219 3.60672   3
   2 -46  -1 1.01760 4.68216   1
  -2 -46   1 -0.1637  4.8076   1
   2  46  -1 -1.2578  3.9912   3
  -2  46   1 3.43557 3.93623   3
  -1 -46   1 180.456  17.700   1
   1 -46  -1 191.910  17.757   1
  -1  46   1 160.763  17.272   3
   1  46  -1 160.891  16.933   3
   0 -46  -1 1.55090 4.90472   1
   0 -46   1 1.82807 4.57778   1
   0  46  -1 -3.7934  3.2736   3
   0  46   1 2.77045 4.30293   3
  -1 -46  -1 34.7727  7.3850   1
   1 -46   1 46.6698  7.2688   1
   1  46   1 44.8114  7.0086   3
  -1  46  -1 41.0446  5.6790   3
   2 -46   1 9.05275 4.60236   1
   2  46   1 10.3878  5.1083   3
   3 -46   1 40.3500  6.7589   1
   3  46   1 33.2863  6.8868   3
   4 -46   1 4.93145 4.40529   1
   4  46   1 -1.8702  4.7839   3
   5 -46   1 -1.7846  4.5933   1
   5  46   1 8.16291 5.48735   3
   6 -46   1 -3.5203  4.4192   1
   6  46   1 -6.1037  5.4149   3
   7 -46   1 0.17636 4.79424   1
   7  46   1 0.79897 5.84975   3
   8 -46   1 3.79936 5.48041   1
   8  46   1 22.6439  7.5253   3
   8 -47  -1 -1.5120  5.9797   1
   8  47  -1 2.26284 5.98588   3
   7 -47  -1 11.0505  6.2180   1
   7  47  -1 2.83805 5.34394   3
   6 -47  -1 0.27361 5.55543   1
   6  47  -1 -2.1528  4.8775   3
   5 -47  -1 19.2142  6.2821   1
  -5  47   1 20.7530  4.4003   3
   5  47  -1 22.1470  5.8567   3
   4 -47  -1 18.9117  6.3552   1
  -4  47   1 18.7751  4.5945   3
   4  47  -1 30.6547  6.0255   3
   3 -47  -1 12.2162  5.6601   1
  -3 -47   1 4.00612 5.70071   1
  -3  47   1 12.0980  4.2312   3
   3  47  -1 9.69532 4.70574   3
  -2 -47   1 11.2492  5.7934   1
   2 -47  -1 17.3311  5.5517   1
   2  47  -1 9.38458 4.35950   3
  -2  47   1 8.75112 4.43512   3
   1 -47  -1 1.61165 4.99036   1
  -1 -47   1 5.47069 5.15752   1
   1  47  -1 7.48408 3.88617   3
  -1  47   1 8.11889 4.49812   3
   0 -47  -1 6.05845 5.38056   1
   0 -47   1 6.32598 4.87664   1
   0  47  -1 -1.7488  3.5086   3
   0  47   1 -0.5999  4.2514   3
   1 -47   1 5.24369 4.54098   1
  -1 -47  -1 -0.6834  5.0564   1
   1  47   1 -5.4372  4.1968   3
  -1  47  -1 0.73656 3.31883   3
   2 -47   1 2.24653 4.47072   1
   2  47   1 4.40353 4.80016   3
   3 -47   1 9.67174 5.12831   1
   3  47   1 18.1089  5.7343   3
   4 -47   1 2.40188 4.64279   1
   4  47   1 -0.6760  4.7682   3
   5 -47   1 5.11425 4.98114   1
   5  47   1 13.3112  5.6589   3
   6 -47   1 3.60640 4.94361   1
   6  47   1 -5.2786  5.3628   3
   7 -47   1 8.55610 5.30350   1
   7  47   1 -1.8990  5.7748   3
   7 -48  -1 49.8314  8.8867   1
   7  48  -1 35.7615  7.6103   3
   6 -48  -1 16.3920  6.4765   1
   6  48  -1 -1.1869  4.9505   3
   5 -48  -1 10.3044  5.6534   1
   5  48  -1 5.75905 4.96741   3
   4 -48  -1 31.6419  6.9548   1
  -4  48   1 25.0014  5.0737   3
   4  48  -1 22.1215  5.7440   3
  -3 -48   1 -2.1792  5.4620   1
   3 -48  -1 7.10203 5.44210   1
  -3  48   1 7.80546 4.21271   3
   3  48  -1 3.79668 4.44942   3
   2 -48  -1 121.064  12.939   1
  -2 -48   1 103.007  12.846   1
  -2  48   1 116.595  11.929   3
   2  48  -1 99.0627 11.8748   3
   1 -48  -1 10.2077  5.4942   1
  -1 -48   1 3.65955 4.96167   1
   1  48  -1 4.35144 3.88255   3
  -1  48   1 3.09520 4.22038   3
   0 -48  -1 54.6758  8.7805   1
   0 -48   1 51.0299  8.2438   1
   0  48  -1 48.9362  6.8281   3
   0  48   1 58.5703  7.7478   3
   1 -48   1 4.43811 4.71615   1
  -1 -48  -1 1.01806 5.13042   1
   1  48   1 -5.9294  4.2056   3
  -1  48  -1 0.87672 3.36125   3
   2 -48   1 21.4394  5.7100   1
   2  48   1 11.8657  5.2163   3
   3 -48   1 11.2992  5.1732   1
   3  48   1 8.23830 5.16420   3
   4 -48   1 6.74591 4.88621   1
   4  48   1 10.1020  5.4025   3
   5 -48   1 10.4305  5.3568   1
   5  48   1 -0.0370  5.2582   3
   6 -48   1 7.58209 5.32997   1
   6  48   1 -4.5228  5.4924   3
   7 -48   1 -1.4748  5.0643   1
   7  48   1 4.03966 6.19719   3
   7 -49  -1 20.7590  7.2862   1
   7  49  -1 15.3197  6.0819   3
   6 -49  -1 2.58227 5.87786   1
   6  49  -1 6.41388 5.26595   3
   5 -49  -1 10.1850  6.0737   1
   5  49  -1 21.7887  5.7032   3
   4 -49  -1 26.1010  6.7239   1
  -4  49   1 27.7120  5.0124   3
   4  49  -1 18.9041  5.6118   3
   3 -49  -1 10.2095  5.7422   1
  -3 -49   1 13.6184  6.3374   1
  -3  49   1 5.67743 4.12324   3
   3  49  -1 0.95198 4.47487   3
  -2 -49   1 2.99778 5.25806   1
   2 -49  -1 5.00017 5.30170   1
  -2  49   1 5.37731 4.22276   3
   2  49  -1 6.12463 4.29159   3
  -1 -49   1 15.8550  5.7287   1
   1 -49  -1 13.3789  5.9076   1
  -1  49   1 13.6201  4.7872   3
   1  49  -1 15.8682  4.4838   3
   0 -49  -1 -0.4848  5.6035   1
   0 -49   1 5.18039 5.23446   1
   0  49  -1 3.63706 3.60122   3
   0  49   1 4.43794 4.50627   3
   1 -49   1 17.4111  5.6430   1
   1  49   1 8.58013 4.80310   3
   2 -49   1 6.32878 4.98573   1
   2  49   1 8.41048 4.98293   3
   3 -49   1 25.2460  6.0648   1
   3  49   1 18.5809  5.7074   3
   4 -49   1 3.81122 5.10615   1
   4  49   1 1.20089 5.11794   3
   5 -49   1 -1.5283  4.9030   1
   5  49   1 0.78352 5.44691   3
   6 -49   1 1.86667 5.30587   1
   6  49   1 -3.5196  5.7290   3
   7 -49   1 -0.7005  5.3204   1
   7  49   1 5.22625 6.36405   3
   6 -50  -1 -4.5929  5.5501   1
   6  50  -1 1.48899 5.16920   3
   5 -50  -1 12.1456  6.1295   1
   5  50  -1 8.30301 5.18656   3
   4 -50  -1 9.13712 5.76414   1
  -4  50   1 4.89510 3.77420   3
   4  50  -1 6.37614 4.90783   3
  -3 -50   1 18.2295  6.4395   1
   3 -50  -1 7.22328 5.71464   1
   3  50  -1 -4.4087  4.1662   3
  -3  50   1 4.76364 4.09471   3
  -2 -50   1 -5.5045  5.0082   1
   2 -50  -1 4.21399 5.57111   1
   2  50  -1 -4.5178  3.9666   3
  -2  50   1 -0.2163  3.8506   3
  -1 -50   1 151.756  16.908   1
   1 -50  -1 143.998  16.776   1
   1  50  -1 151.733  15.835   3
  -1  50   1 174.916  16.216   3
   0 -50  -1 8.42500 5.91438   1
   0 -50   1 -0.3079  4.9994   1
   0  50  -1 -0.7609  3.5569   3
   0  50   1 1.67665 4.43180   3
   1 -50   1 16.4233  5.5005   1
   1  50   1 1.49596 4.56152   3
   2 -50   1 2.09728 4.76353   1
   2  50   1 -4.3828  4.6188   3
   3 -50   1 10.0004  5.4982   1
   3  50   1 14.4717  5.4179   3
   4 -50   1 -0.3819  4.8512   1
   4  50   1 -7.7248  4.6916   3
   5 -50   1 -3.3693  4.7550   1
   5  50   1 -2.4317  5.1993   3
   6 -50   1 6.59310 5.64423   1
   6  50   1 2.98493 5.91566   3
   6 -51  -1 5.01892 6.56322   1
   6  51  -1 5.68077 5.59079   3
   5 -51  -1 12.1085  6.5132   1
   5  51  -1 14.4611  5.5221   3
   4 -51  -1 35.6064  7.5239   1
   4  51  -1 18.0529  5.8532   3
  -4  51   1 31.2585  5.1234   3
   3 -51  -1 -0.1432  5.5993   1
   3  51  -1 -0.8763  4.2072   3
  -3  51   1 -2.5390  3.6943   3
  -2 -51   1 -3.6971  5.4318   1
   2 -51  -1 2.70412 5.69159   1
  -2  51   1 8.76268 4.28969   3
   2  51  -1 6.83726 4.28159   3
  -1 -51   1 13.7332  6.1478   1
   1 -51  -1 19.3538  6.3181   1
   1  51  -1 6.28992 4.28172   3
  -1  51   1 27.3864  5.2930   3
   0 -51   1 9.36619 5.54944   1
   0  51   1 -1.2184  4.0871   3
   0  51  -1 -3.6568  3.4556   3
   1 -51   1 3.70881 4.96920   1
   1  51   1 -11.346   4.249   3
   2 -51   1 4.82150 5.00962   1
   2  51   1 1.64673 4.75691   3
   3 -51   1 -0.4410  5.0665   1
   3  51   1 -0.3684  4.6520   3
   4 -51   1 -3.1104  4.9576   1
   4  51   1 0.98484 5.14546   3
   5 -51   1 0.09032 5.06514   1
   5  51   1 7.26121 5.58404   3
   6 -51   1 -1.0948  5.4003   1
   6  51   1 -0.7549  5.5613   3
   5 -52  -1 9.61100 6.71296   1
   5  52  -1 10.6722  5.4913   3
   4 -52  -1 24.1675  7.3706   1
  -4  52   1 27.3156  4.8588   3
   4  52  -1 18.6812  5.7228   3
   3 -52  -1 0.86553 5.80364   1
  -3  52   1 -4.9340  3.7175   3
   3  52  -1 2.48498 4.49075   3
   2 -52  -1 8.32757 6.12914   1
  -2 -52   1 7.34985 6.14585   1
  -2  52   1 7.55434 4.22764   3
   2  52  -1 10.0524  4.3319   3
   1 -52  -1 2.01417 5.81708   1
  -1 -52   1 2.94982 5.86376   1
   1  52  -1 1.12463 3.87058   3
  -1  52   1 0.60000 4.10257   3
   0 -52   1 20.0664  6.4125   1
   0  52   1 21.5808  5.3616   3
   0  52  -1 14.9110  4.3185   3
   1 -52   1 2.18101 5.30631   1
   1  52   1 -8.8315  4.2922   3
   2 -52   1 13.6164  5.7159   1
   2  52   1 5.02645 4.80235   3
   3 -52   1 9.13682 5.29144   1
   3  52   1 -2.3197  4.7661   3
   4 -52   1 10.2373  5.6900   1
   4  52   1 -5.4883  4.8280   3
   5 -52   1 4.02108 5.34584   1
   5  52   1 -4.4432  5.2864   3
   5 -53  -1 22.4581  7.6842   1
   5  53  -1 19.1955  6.0127   3
   4 -53  -1 21.3999  7.2547   1
   4  53  -1 12.8543  5.3646   3
   3 -53  -1 6.34713 6.25276   1
  -3  53   1 -3.8038  3.7650   3
   3  53  -1 3.39767 4.50146   3
  -2 -53   1 7.33933 6.62115   1
   2 -53  -1 13.2886  6.4201   1
  -2  53   1 6.74345 4.38048   3
   2  53  -1 8.55634 4.52103   3
  -1 -53   1 -0.7597  5.7876   1
  -1  53   1 -0.6606  4.1184   3
   1  53  -1 -0.0803  3.9609   3
   0 -53   1 0.15843 5.80830   1
   0  53   1 -1.6303  4.2445   3
   0  53  -1 5.07475 3.68292   3
   1 -53   1 1.88994 5.59739   1
   1  53   1 3.62279 4.81544   3
   2 -53   1 -2.3459  5.2569   1
   2  53   1 5.20202 4.82075   3
   3 -53   1 4.60880 5.53953   1
   3  53   1 1.69375 4.87158   3
   4 -53   1 9.43962 5.97388   1
   4  53   1 -3.9482  5.0698   3
   5 -53   1 -4.3685  5.1965   1
   5  53   1 -4.8788  5.3597   3
   4 -54  -1 4.12610 6.56494   1
   4  54  -1 11.8171  5.1676   3
   3 -54  -1 16.9786  6.8402   1
  -3  54   1 7.17356 4.19237   3
   3  54  -1 -3.9565  4.2141   3
   2 -54  -1 -5.5507  5.6484   1
  -2  54   1 0.76300 4.13198   3
   2  54  -1 4.27376 4.26951   3
  -1 -54   1 38.0729  8.2691   1
  -1  54   1 27.9919  5.8282   3
   1  54  -1 25.1887  5.3604   3
   0 -54   1 0.77333 5.72757   1
   0  54   1 -0.9692  4.3340   3
   0  54  -1 0.81659 3.68153   3
   1 -54   1 1.25892 5.72389   1
   1  54   1 -4.3686  4.3332   3
   2 -54   1 -1.7754  5.1468   1
   2  54   1 3.77753 4.76277   3
   3 -54   1 -0.2489  5.5482   1
   3  54   1 2.59136 5.07797   3
   4 -54   1 2.58653 5.81771   1
   4  54   1 -8.7369  5.1163   3
   3 -55  -1 11.1329  6.8258   1
  -3  55   1 3.69212 3.96724   3
   3  55  -1 0.36634 4.37445   3
   2  55  -1 1.06722 4.28786   3
  -2  55   1 9.88496 4.41271   3
  -1 -55   1 3.45279 6.52583   1
  -1  55   1 6.30970 4.38379   3
   1  55  -1 4.25565 4.19369   3
   0 -55   1 -3.5216  6.0288   1
   0  55   1 -0.8815  4.2236   3
   1 -55   1 4.06577 5.86659   1
   1  55   1 -2.5031  4.5133   3
   2 -55   1 4.50732 5.87929   1
   2  55   1 7.98621 5.08496   3
   3 -55   1 5.03795 6.21861   1
   3  55   1 -5.3782  4.9246   3
  -2  56   1 24.2871  5.0775   3
   2  56  -1 15.2319  5.3050   3
   1  56  -1 -1.6531  3.9358   3
  -1  56   1 0.18832 4.11313   3
   0 -56   1 13.4286  6.8617   1
   0  56   1 1.57476 4.31568   3
   1 -56   1 1.69077 6.45104   1
   1  56   1 1.44659 4.64386   3
   2 -56   1 1.74201 5.99570   1
   2  56   1 -3.5773  4.7736   3
   1  57  -1 -0.3688  4.0901   3
  -1  57   1 2.49404 4.33129   3
   0  57   1 5.78019 4.64687   3
   1  57   1 22.7078  5.9070   3
 -14   0   2 -2.5434  5.2128   3
 -13   0   2 0.30959 4.21651   6
 -13   0   2 -0.3970  5.0236   3
  13   0  -2 -2.4423  4.5323   2
  12   0  -2 2.96584 4.48752   2
 -12   0   2 5.62682 4.64105   6
 -12   0   2 4.16316 5.27615   3
  11   0  -2 -7.2221  4.2775   1
 -11   0   2 -4.5521  4.5859   6
  11   0  -2 -0.0403  4.0902   2
 -11   0   2 6.35901 5.11841   3
 -10   0   2 -5.8155  4.7878   6
 -10   0   2 4.23343 4.94916   3
  10   0  -2 0.37636 3.98519   1
  10   0  -2 -0.3614  3.9123   2
   9   0  -2 -1.5451  3.4771   1
   9   0  -2 -4.2587  4.5548   3
  -9   0   2 -4.0880  4.2972   3
   9   0  -2 6.41366 3.79868   2
  -9   0   2 -0.1124  4.3664   6
  -8   0   2 4.94410 4.47021   6
   8   0  -2 8.97537 3.62310   2
  -8   0   2 6.44528 4.29293   3
   8   0  -2 6.67642 3.47147   1
   8   0  -2 1.13482 3.92835   3
   7   0  -2 11.3206  3.7827   2
  -7   0   2 5.12278 4.27937   6
   7   0  -2 8.10686 5.55254   6
   7   0  -2 9.57348 3.33489   1
  -7   0   2 8.82227 4.31119   3
   7   0  -2 12.8447  4.0834   3
  -6   0   2 13.8244  4.8617   3
   6   0  -2 21.0647  3.9449   1
   6   0  -2 10.2411  5.4760   6
   6   0  -2 13.8347  4.2512   3
   6   0  -2 12.4561  4.1417   2
  -6   0   2 16.3349  4.8078   6
   5   0  -2 19.7009  4.2818   2
   5   0  -2 19.8310  3.6363   1
  -5   0   2 17.0980  4.7675   3
   5   0  -2 20.6327  4.2580   3
   5   0  -2 9.80244 4.96132   6
   4   0  -2 50.1085  5.6336   1
  -4   0   2 44.3144  6.4564   3
   4   0  -2 63.0492  6.2049   3
   4   0  -2 52.0626  6.4982   2
   4   0  -2 49.2808  6.5246   6
   3   0  -2 -4.3871  2.2305   6
   3   0  -2 0.75238 2.03670   2
   3   0  -2 -1.9544  1.4724   1
   3   0  -2 -4.4734  1.7550   3
  -3   0   2 -0.0479  2.3503   3
   2   0  -2 199.273  18.481   2
   2   0  -2 197.187  18.807   6
   2   0  -2 203.787  18.650   3
   2   0  -2 199.663  18.139   1
  -2   0   2 200.714  18.859   3
   1   0  -2 -2.6185  1.1739   6
   1   0  -2 1.10923 1.56605   3
   1   0  -2 1.00746 1.18386   3
   1   0  -2 -0.6609  1.5975   2
  -1   0   2 -1.1977  0.8393   1
   0   0  -2 460.599  44.001   2
   0   0  -2 552.843  44.285   5
   0   0   2 432.510  43.838   1
   0   0  -2 438.289  44.069   4
   0   0   2 557.084  44.285   5
  -1   0  -2 2.12522 1.52888   4
   2   0   2 487.188  43.297   1
   3   0   2 32.6466  3.4099   1
  -4   0  -2 9.50367 2.41177   3
   4   0   2 17.2340  2.1557   1
  -4   0  -2 13.7672  2.0731   3
   4   0   2 11.8504  1.9071   2
   5   0   2 424.393  39.122   2
  -5   0  -2 467.285  40.379   3
  -5   0  -2 426.996  40.163   3
   5   0   2 437.836  39.378   1
  -6   0  -2 3.00008 2.27900   3
   6   0   2 0.52804 1.91274   2
   6   0   2 3.12944 2.15913   1
  -6   0  -2 4.56526 2.86515   3
  -7   0  -2 121.203  11.696   3
   7   0   2 107.980  10.885   2
   7   0   2 121.023  11.334   1
  -7   0  -2 113.017  11.443   3
  -8   0  -2 0.80174 2.75462   3
  -8   0  -2 2.02045 2.75298   3
   8   0   2 1.17121 2.21093   2
   8   0   2 -1.6012  2.4808   1
  -9   0  -2 115.466  12.017   3
  -9   0  -2 113.358  12.168   3
   9   0   2 112.424  11.368   2
   9   0   2 125.077  12.142   1
  10   0   2 1.46902 2.89123   2
  10   0   2 0.62478 3.42292   1
 -10   0  -2 -0.9477  3.3577   3
 -11   0  -2 -3.3176  3.3343   3
  11   0   2 0.94277 4.14541   1
 -12   0  -2 4.15011 3.40415   3
  12   0   2 -0.7277  4.4944   1
  13   0   2 -0.8167  5.2565   1
 -14  -1   2 -0.7595  5.3845   3
 -14  -1   2 6.22438 3.93446   6
 -14   1   2 -3.4627  5.0968   3
  13  -1  -2 1.12092 4.62088   2
 -13  -1   2 0.81578 5.27861   3
 -13  -1   2 5.83208 4.51965   6
 -13   1   2 -2.7948  4.8118   3
 -13   1   2 9.00842 4.24139   6
  13   1  -2 3.97293 4.69242   2
  12  -1  -2 21.5446  5.4473   2
 -12  -1   2 19.9683  6.1588   3
 -12   1   2 15.8924  5.0572   6
 -12   1   2 25.6654  6.2349   3
  12   1  -2 10.5392  4.8798   2
  11  -1  -2 -5.4910  4.3577   1
  11  -1  -2 -2.9988  3.9195   2
 -11  -1   2 2.56867 4.89749   3
 -11   1   2 2.73562 4.92063   3
  11   1  -2 3.52899 4.74966   1
  11   1  -2 2.73473 4.15727   2
 -11   1   2 -3.0941  4.3331   6
  10  -1  -2 14.9918  4.7534   1
  10  -1  -2 9.00585 4.25784   2
 -10  -1   2 9.78755 5.39958   6
 -10  -1   2 6.43560 5.30926   3
 -10   1   2 7.55273 5.04586   3
  10   1  -2 9.65715 4.60784   1
 -10   1   2 7.34711 5.03726   6
  10   1  -2 7.25337 4.31402   2
   9  -1  -2 -6.0960  3.2113   2
   9  -1  -2 4.67813 4.86895   3
  -9  -1   2 -4.1888  4.3777   6
  -9  -1   2 -0.0583  4.6346   3
   9  -1  -2 -4.0848  3.2007   1
  -9   1   2 0.89510 4.35870   6
   9   1  -2 -0.2786  3.4495   2
   9   1  -2 -0.5277  4.5836   3
   9   1  -2 3.98836 3.86887   1
  -9   1   2 0.74449 4.53050   3
  -8  -1   2 28.3679  6.1087   6
   8  -1  -2 28.7984  5.1934   2
   8  -1  -2 29.2579  5.6194   3
   8  -1  -2 31.8467  5.0540   1
  -8  -1   2 34.3918  6.1354   3
  -8   1   2 19.8284  5.3882   6
[truncated: 1,671,525 more chars]
