# Supplementary material for: From Discrete Complexes to Metal–Organic Layered Materials: Remarkable Hydrogen Bonding Frameworks
Source: Molecules. 2020 Mar 16;25(6):1353. doi: 10.3390/molecules25061353 (PMC7146137; doi:10.3390/molecules25061353)
Supplement: Supplementary file 1 [file molecules-25-01353-s001.zip › 3_LCS0412.CIF]

data_general

_publ_contact_author_name         'Dr Lu\'is Cunha Silva'
_publ_contact_author_address
; LAQV/REQUIMTE & Dep. of Chemistry and Biochemistry
  Faculty of Sciences
  University of Porto
  4169-007 Porto
  Portugal
;

_publ_contact_author_email        'l.cunha.silva@fc.up.pt'
_publ_contact_author_fax          '+351 220402576'
_publ_contact_author_phone        '+351 220402659'

_journal_name_full                'Molecules'

loop_
_publ_author_name
_publ_author_footnote
_publ_author_address

'Carla, Queir\\'os'  .
; LAQV/REQUIMTE & Dep. of Chemistry and Biochemistry
  Faculty of Sciences
  University of Porto
  4169-007 Porto
  Portugal
; 

'Silva, Ana M. G.'  .
; LAQV/REQUIMTE & Dep. of Chemistry and Biochemistry
  Faculty of Sciences
  University of Porto
  4169-007 Porto
  Portugal
;

'Castro, Baltazar de'  .
; LAQV/REQUIMTE & Dep. of Chemistry and Biochemistry
  Faculty of Sciences
  University of Porto
  4169-007 Porto
  Portugal
;

'Cunha-Silva, Lu\'is'  .
; LAQV/REQUIMTE & Dep. of Chemistry and Biochemistry
  Faculty of Sciences
  University of Porto
  4169-007 Porto
  Portugal
;

 
data_lcs0412 
 
# ========================================================================= #
 
_audit_creation_method            'SHELXL-97, manual editing plus enCIFer'
_audit_creation_date              '12 March 2014'

# ========================================================================= #

_chemical_name_systematic 
; 
 ? 
; 
_chemical_name_common             ? 
_chemical_melting_point           ? 
_chemical_formula_moiety          'C8 H9 Ca N O6, H2 O' 
_chemical_formula_sum             'C8 H11 Ca N O7' 
_chemical_formula_weight          273.26 
 
loop_ 
 _atom_type_symbol 
 _atom_type_description 
 _atom_type_scat_dispersion_real 
 _atom_type_scat_dispersion_imag 
 _atom_type_scat_source 
 'C'  'C'   0.0033   0.0016 
 'International Tables Vol C Tables 4.2.6.8 and 6.1.1.4' 
 'H'  'H'   0.0000   0.0000 
 'International Tables Vol C Tables 4.2.6.8 and 6.1.1.4' 
 'N'  'N'   0.0061   0.0033 
 'International Tables Vol C Tables 4.2.6.8 and 6.1.1.4' 
 'O'  'O'   0.0106   0.0060 
 'International Tables Vol C Tables 4.2.6.8 and 6.1.1.4' 
 'Ca'  'Ca'   0.2262   0.3064 
 'International Tables Vol C Tables 4.2.6.8 and 6.1.1.4' 
 
_symmetry_cell_setting            Triclinic 
_symmetry_space_group_name_H-M    'P -1' 
_symmetry_space_group_name_Hall   '-P 1'
 
loop_ 
 _symmetry_equiv_pos_as_xyz 
 'x, y, z' 
 '-x, -y, -z' 
 
_cell_length_a                    8.1375(9) 
_cell_length_b                    10.2726(10) 
_cell_length_c                    13.3429(14) 
_cell_angle_alpha                 74.135(5) 
_cell_angle_beta                  79.343(5) 
_cell_angle_gamma                 84.520(5) 
_cell_volume                      1053.19(19) 
_cell_formula_units_Z             4 
_cell_measurement_temperature     150(2) 
_cell_measurement_reflns_used     8103 
_cell_measurement_theta_min       2.55 
_cell_measurement_theta_max       29.04 
 
_exptl_crystal_description        block 
_exptl_crystal_colour             orange 
_exptl_crystal_size_max           0.17 
_exptl_crystal_size_mid           0.10 
_exptl_crystal_size_min           0.05 
_exptl_crystal_density_meas       ? 
_exptl_crystal_density_diffrn     1.723 
_exptl_crystal_density_method     'not measured' 
_exptl_crystal_F_000              568 
_exptl_absorpt_coefficient_mu     0.621 
_exptl_absorpt_correction_type    multi-scan 
_exptl_absorpt_correction_T_min   0.9017 
_exptl_absorpt_correction_T_max   0.9696 
_exptl_absorpt_process_details    
;
 SADABS (Sheldrick, 1997)
;      
 
 
_exptl_special_details 
; 
 ? 
; 
 
_diffrn_ambient_temperature       150(2) 
_diffrn_radiation_wavelength      0.71073 
_diffrn_radiation_type            MoK\a 
_diffrn_radiation_source          'fine-focus sealed tube' 
_diffrn_radiation_monochromator   graphite 
_diffrn_measurement_device_type   'Bruker X8 Kappa CCD APEX II'
_diffrn_measurement_method        'omega/phi scans'
_diffrn_detector_area_resol_mean  ? 
_diffrn_standards_number          ? 
_diffrn_standards_interval_count  ? 
_diffrn_standards_interval_time   ? 
_diffrn_standards_decay_%         ? 
_diffrn_reflns_number             27959 
_diffrn_reflns_av_R_equivalents   0.0294 
_diffrn_reflns_av_sigmaI/netI     0.0192 
_diffrn_reflns_limit_h_min        -9 
_diffrn_reflns_limit_h_max        9 
_diffrn_reflns_limit_k_min        -12 
_diffrn_reflns_limit_k_max        12 
_diffrn_reflns_limit_l_min        -15 
_diffrn_reflns_limit_l_max        15 
_diffrn_reflns_theta_min          3.67 
_diffrn_reflns_theta_max          25.03 
_reflns_number_total              3680 
_reflns_number_gt                 2688 
_reflns_threshold_expression      >2sigma(I) 
 
_computing_data_collection        'APEX2 (Bruker, 2006)' 
_computing_cell_refinement        'APEX2 '
_computing_data_reduction         'SAINT+ (Bruker, 1997-2005)' 
_computing_structure_solution     'SHELXTL (Bruker 2001)' 
_computing_structure_refinement   'SHELXTL '
_computing_molecular_graphics     'SHELXTL ' 
_computing_publication_material   'SHELXTL ' 
 
_refine_special_details 
; 
 Refinement of F^2^ against ALL reflections.  The weighted R-factor wR and 
 goodness of fit S are based on F^2^, conventional R-factors R are based 
 on F, with F set to zero for negative F^2^. The threshold expression of 
 F^2^ > 2sigma(F^2^) is used only for calculating R-factors(gt) etc. and is 
 not relevant to the choice of reflections for refinement.  R-factors based 
 on F^2^ are statistically about twice as large as those based on F, and R- 
 factors based on ALL data will be even larger. 
; 
 
_refine_ls_structure_factor_coef  Fsqd  
_refine_ls_matrix_type            full 
_refine_ls_weighting_scheme       calc  
_refine_ls_weighting_details 
 'calc w=1/[\s^2^(Fo^2^)+(0.0411P)^2^+0.3713P] where P=(Fo^2^+2Fc^2^)/3' 
_atom_sites_solution_primary      direct 
_atom_sites_solution_secondary    difmap 
_atom_sites_solution_hydrogens    geom 
_refine_ls_hydrogen_treatment     mixed 
_refine_ls_extinction_method      none 
_refine_ls_extinction_coef        ? 
_refine_ls_number_reflns          3680 
_refine_ls_number_parameters      355 
_refine_ls_number_restraints      22 
_refine_ls_R_factor_all           0.0418 
_refine_ls_R_factor_gt            0.0292 
_refine_ls_wR_factor_ref          0.0899 
_refine_ls_wR_factor_gt           0.0806 
_refine_ls_goodness_of_fit_ref    1.093 
_refine_ls_restrained_S_all       1.098 
_refine_ls_shift/su_max           0.000 
_refine_ls_shift/su_mean          0.000 
 
loop_ 
 _atom_site_label 
 _atom_site_type_symbol 
 _atom_site_fract_x 
 _atom_site_fract_y 
 _atom_site_fract_z 
 _atom_site_U_iso_or_equiv 
 _atom_site_adp_type 
 _atom_site_occupancy 
 _atom_site_symmetry_multiplicity 
 _atom_site_calc_flag 
 _atom_site_refinement_flags 
 _atom_site_disorder_assembly 
 _atom_site_disorder_group 
Ca1 Ca 0.06215(4) 0.75796(3) 0.51931(3) 0.01532(13) Uani 1 1 d . . . 
O3 O 0.83617(15) 1.03847(12) 0.57795(10) 0.0194(3) Uani 1 1 d . . . 
O1 O 0.09165(15) 1.27963(12) 0.60404(10) 0.0183(3) Uani 1 1 d . . . 
O1W O -0.00650(18) 0.53699(13) 0.62527(12) 0.0287(4) Uani 1 1 d D . . 
H1W H -0.086(2) 0.522(2) 0.6774(15) 0.043 Uiso 1 1 d D . . 
H2W H 0.028(3) 0.4556(18) 0.6104(17) 0.043 Uiso 1 1 d D . . 
N1 N 0.1723(2) 0.76826(15) 0.68333(13) 0.0180(4) Uani 1 1 d D . . 
H1A H 0.217(2) 0.6865(16) 0.7054(16) 0.027 Uiso 1 1 d D . . 
H2A H 0.086(2) 0.777(2) 0.7304(15) 0.027 Uiso 1 1 d D . . 
O4 O 0.80647(15) 0.81643(12) 0.61283(10) 0.0210(3) Uani 1 1 d . . . 
C5 C 0.4540(2) 0.85249(17) 0.64839(14) 0.0150(4) Uani 1 1 d . . . 
H5 H 0.5000 0.7627 0.6543 0.018 Uiso 1 1 calc R . . 
C4 C 0.2818(2) 0.87621(17) 0.66407(13) 0.0145(4) Uani 1 1 d . . . 
O2W O 0.30089(17) 0.61826(13) 0.47150(12) 0.0267(3) Uani 1 1 d D . . 
H3W H 0.405(2) 0.640(2) 0.4445(17) 0.040 Uiso 1 1 d D . . 
H4W H 0.298(3) 0.5315(16) 0.5074(16) 0.040 Uiso 1 1 d D . . 
C3 C 0.2143(2) 1.00834(17) 0.65263(13) 0.0143(4) Uani 1 1 d . . . 
H3 H 0.0963 1.0249 0.6627 0.017 Uiso 1 1 calc R . . 
C6 C 0.5602(2) 0.95983(17) 0.62392(13) 0.0143(4) Uani 1 1 d . . . 
C2 C 0.3193(2) 1.11600(16) 0.62648(13) 0.0140(4) Uani 1 1 d . . . 
C7 C 0.4922(2) 1.09058(16) 0.61415(13) 0.0134(4) Uani 1 1 d . . . 
H7 H 0.5641 1.1636 0.5989 0.016 Uiso 1 1 calc R . . 
Ca2 Ca 0.06303(4) 0.75328(3) 0.02341(3) 0.01530(13) Uani 1 1 d . . . 
O8 O -0.81764(15) 1.17670(12) -0.11547(10) 0.0216(3) Uani 1 1 d . . . 
O6 O -0.08938(15) 0.72638(11) -0.10405(10) 0.0179(3) Uani 1 1 d . . . 
O7 O -0.83764(15) 0.95319(12) -0.07826(10) 0.0194(3) Uani 1 1 d . . . 
O5 O -0.34348(15) 0.64983(12) -0.08380(11) 0.0234(3) Uani 1 1 d . . . 
O3W O -0.02292(18) 0.53447(13) 0.12616(12) 0.0284(4) Uani 1 1 d D . . 
H5W H -0.125(2) 0.529(2) 0.1594(17) 0.043 Uiso 1 1 d D . . 
H6W H 0.022(2) 0.4585(18) 0.1146(18) 0.043 Uiso 1 1 d D . . 
C13 C -0.4643(2) 1.15001(17) -0.15055(13) 0.0146(4) Uani 1 1 d . . . 
H13 H -0.5133 1.2392 -0.1582 0.017 Uiso 1 1 calc R . . 
N2 N -0.1851(2) 1.24038(15) -0.18611(13) 0.0178(4) Uani 1 1 d D . . 
H3A H -0.095(2) 1.235(2) -0.2325(15) 0.027 Uiso 1 1 d D . . 
H4A H -0.234(2) 1.3215(16) -0.2097(16) 0.027 Uiso 1 1 d D . . 
O4W O 0.30127(17) 0.61480(13) -0.02468(12) 0.0265(3) Uani 1 1 d D . . 
H7W H 0.408(2) 0.634(2) -0.0459(17) 0.040 Uiso 1 1 d D . . 
H8W H 0.292(3) 0.5280(16) 0.0092(17) 0.040 Uiso 1 1 d D . . 
C16 C -0.7542(2) 1.05810(17) -0.10496(13) 0.0146(4) Uani 1 1 d . . . 
C9 C -0.2466(2) 0.74526(17) -0.10263(14) 0.0161(4) Uani 1 1 d . . . 
C14 C -0.5661(2) 1.03946(17) -0.12471(13) 0.0139(4) Uani 1 1 d . . . 
C15 C -0.4936(2) 0.91000(16) -0.11244(13) 0.0138(4) Uani 1 1 d . . . 
H15 H -0.5628 0.8350 -0.0958 0.017 Uiso 1 1 calc R . . 
C10 C -0.3206(2) 0.88807(16) -0.12411(13) 0.0144(4) Uani 1 1 d . . . 
C12 C -0.2911(2) 1.12933(17) -0.16498(13) 0.0144(4) Uani 1 1 d . . . 
C11 C -0.2188(2) 0.99831(17) -0.15105(14) 0.0151(4) Uani 1 1 d . . . 
H11 H -0.1005 0.9842 -0.1599 0.018 Uiso 1 1 calc R . . 
O2 O 0.34514(15) 1.35377(12) 0.59040(11) 0.0219(3) Uani 1 1 d . . . 
C8 C 0.7476(2) 0.93682(17) 0.60401(13) 0.0154(4) Uani 1 1 d . . . 
C1 C 0.2481(2) 1.25953(17) 0.60560(14) 0.0159(4) Uani 1 1 d . . . 
O5W O -0.3329(2) 0.54084(19) 0.74684(13) 0.0475(5) Uani 1 1 d D . . 
H9W H -0.295(4) 0.598(2) 0.6941(14) 0.071 Uiso 1 1 d D . . 
H10W H -0.334(4) 0.569(3) 0.8038(15) 0.071 Uiso 1 1 d D . . 
O6W O -0.33731(19) 0.51007(15) 0.25024(12) 0.0342(4) Uani 1 1 d D . . 
H11W H -0.325(3) 0.579(2) 0.2725(19) 0.051 Uiso 1 1 d D . . 
H12W H -0.448(2) 0.498(2) 0.2504(17) 0.051 Uiso 1 1 d D . . 
 
loop_ 
 _atom_site_aniso_label 
 _atom_site_aniso_U_11 
 _atom_site_aniso_U_22 
 _atom_site_aniso_U_33 
 _atom_site_aniso_U_23 
 _atom_site_aniso_U_13 
 _atom_site_aniso_U_12 
Ca1 0.0112(2) 0.0125(2) 0.0215(2) -0.00381(16) -0.00189(16) -0.00028(15) 
O3 0.0126(7) 0.0188(7) 0.0240(7) -0.0007(5) -0.0018(6) -0.0029(5) 
O1 0.0128(7) 0.0160(6) 0.0274(7) -0.0079(5) -0.0048(6) 0.0021(5) 
O1W 0.0265(9) 0.0132(7) 0.0416(9) -0.0061(6) 0.0054(7) -0.0020(6) 
N1 0.0157(9) 0.0122(7) 0.0246(9) -0.0035(7) -0.0007(7) -0.0022(7) 
O4 0.0158(7) 0.0181(7) 0.0267(7) -0.0057(6) -0.0011(6) 0.0052(5) 
C5 0.0167(10) 0.0115(8) 0.0156(9) -0.0034(7) -0.0015(8) 0.0014(7) 
C4 0.0169(10) 0.0138(9) 0.0121(9) -0.0023(7) -0.0018(7) -0.0027(7) 
O2W 0.0169(8) 0.0152(7) 0.0407(9) -0.0010(6) 0.0038(7) 0.0009(6) 
C3 0.0108(9) 0.0179(9) 0.0149(9) -0.0055(7) -0.0026(7) 0.0009(7) 
C6 0.0147(10) 0.0162(9) 0.0123(9) -0.0048(7) -0.0021(7) 0.0011(7) 
C2 0.0149(10) 0.0151(9) 0.0129(9) -0.0053(7) -0.0027(8) 0.0003(7) 
C7 0.0138(10) 0.0128(9) 0.0140(9) -0.0035(7) -0.0031(8) -0.0017(7) 
Ca2 0.0113(2) 0.0127(2) 0.0213(2) -0.00421(16) -0.00178(16) -0.00030(15) 
O8 0.0167(7) 0.0184(7) 0.0271(8) -0.0052(6) -0.0011(6) 0.0044(5) 
O6 0.0126(7) 0.0156(6) 0.0267(7) -0.0078(5) -0.0048(6) 0.0031(5) 
O7 0.0121(7) 0.0193(7) 0.0242(7) -0.0020(6) -0.0016(6) -0.0023(5) 
O5 0.0144(7) 0.0128(6) 0.0406(9) -0.0046(6) -0.0020(6) -0.0013(5) 
O3W 0.0245(8) 0.0151(7) 0.0426(9) -0.0084(6) 0.0036(7) -0.0013(6) 
C13 0.0176(10) 0.0117(8) 0.0135(9) -0.0025(7) -0.0026(8) 0.0014(7) 
N2 0.0145(9) 0.0132(8) 0.0240(9) -0.0027(7) -0.0010(7) -0.0033(6) 
O4W 0.0151(7) 0.0146(7) 0.0431(9) -0.0030(6) 0.0040(7) 0.0011(6) 
C16 0.0161(10) 0.0158(9) 0.0107(9) -0.0026(7) -0.0016(7) 0.0008(8) 
C9 0.0164(11) 0.0150(9) 0.0161(10) -0.0042(7) -0.0013(8) 0.0013(8) 
C14 0.0128(10) 0.0167(9) 0.0122(9) -0.0043(7) -0.0017(7) 0.0001(7) 
C15 0.0133(10) 0.0121(9) 0.0156(9) -0.0029(7) -0.0017(8) -0.0027(7) 
C10 0.0153(10) 0.0138(9) 0.0142(9) -0.0038(7) -0.0030(8) -0.0002(7) 
C12 0.0169(10) 0.0146(9) 0.0117(9) -0.0028(7) -0.0012(7) -0.0045(7) 
C11 0.0123(10) 0.0170(9) 0.0158(9) -0.0050(7) -0.0017(8) 0.0004(7) 
O2 0.0151(7) 0.0129(6) 0.0368(8) -0.0065(6) -0.0018(6) -0.0014(5) 
C8 0.0154(10) 0.0175(9) 0.0118(9) -0.0024(7) -0.0019(7) 0.0026(8) 
C1 0.0156(10) 0.0155(9) 0.0166(10) -0.0055(7) -0.0013(8) 0.0002(8) 
O5W 0.0383(10) 0.0747(13) 0.0272(9) -0.0163(9) -0.0094(8) 0.0257(9) 
O6W 0.0286(9) 0.0361(9) 0.0381(9) -0.0132(7) -0.0039(7) 0.0042(7) 
 
_geom_special_details 
; 
 All esds (except the esd in the dihedral angle between two l.s. planes) 
 are estimated using the full covariance matrix.  The cell esds are taken 
 into account individually in the estimation of esds in distances, angles 
 and torsion angles; correlations between esds in cell parameters are only 
 used when they are defined by crystal symmetry.  An approximate (isotropic) 
 treatment of cell esds is used for estimating esds involving l.s. planes. 
; 
 
loop_ 
 _geom_bond_atom_site_label_1 
 _geom_bond_atom_site_label_2 
 _geom_bond_distance 
 _geom_bond_site_symmetry_2 
 _geom_bond_publ_flag 
Ca1 O3 2.2784(12) 2_676 ? 
Ca1 O4 2.3362(13) 1_455 ? 
Ca1 O1 2.3719(13) 2_576 ? 
Ca1 O1W 2.3788(13) . ? 
Ca1 O2W 2.3980(13) . ? 
Ca1 N1 2.5446(17) . ? 
Ca1 C8 3.2205(18) 1_455 ? 
O3 C8 1.258(2) . ? 
O3 Ca1 2.2784(12) 2_676 ? 
O1 C1 1.273(2) . ? 
O1 Ca1 2.3719(13) 2_576 ? 
O1W H1W 0.849(15) . ? 
O1W H2W 0.918(15) . ? 
N1 C4 1.427(2) . ? 
N1 H1A 0.878(15) . ? 
N1 H2A 0.868(15) . ? 
O4 C8 1.265(2) . ? 
O4 Ca1 2.3362(13) 1_655 ? 
C5 C4 1.386(3) . ? 
C5 C6 1.396(2) . ? 
C5 H5 0.9500 . ? 
C4 C3 1.394(2) . ? 
O2W H3W 0.882(15) . ? 
O2W H4W 0.889(15) . ? 
C3 C2 1.391(2) . ? 
C3 H3 0.9500 . ? 
C6 C7 1.384(2) . ? 
C6 C8 1.506(2) . ? 
C2 C7 1.394(2) . ? 
C2 C1 1.503(2) . ? 
C7 H7 0.9500 . ? 
Ca2 O7 2.2582(12) 1_655 ? 
Ca2 O8 2.3055(13) 2_475 ? 
Ca2 O6 2.3684(13) . ? 
Ca2 O3W 2.3837(13) . ? 
Ca2 O4W 2.3887(13) . ? 
Ca2 N2 2.5672(17) 2_575 ? 
Ca2 C16 3.2353(18) 2_475 ? 
O8 C16 1.259(2) . ? 
O8 Ca2 2.3055(13) 2_475 ? 
O6 C9 1.273(2) . ? 
O7 C16 1.261(2) . ? 
O7 Ca2 2.2582(12) 1_455 ? 
O5 C9 1.259(2) . ? 
O3W H5W 0.867(15) . ? 
O3W H6W 0.869(15) . ? 
C13 C12 1.390(2) . ? 
C13 C14 1.399(2) . ? 
C13 H13 0.9500 . ? 
N2 C12 1.431(2) . ? 
N2 Ca2 2.5672(17) 2_575 ? 
N2 H3A 0.875(15) . ? 
N2 H4A 0.890(15) . ? 
O4W H7W 0.889(15) . ? 
O4W H8W 0.886(15) . ? 
C16 C14 1.506(2) . ? 
C16 Ca2 3.2353(18) 2_475 ? 
C9 C10 1.504(2) . ? 
C14 C15 1.382(2) . ? 
C15 C10 1.391(2) . ? 
C15 H15 0.9500 . ? 
C10 C11 1.394(2) . ? 
C12 C11 1.394(2) . ? 
C11 H11 0.9500 . ? 
O2 C1 1.258(2) . ? 
C8 Ca1 3.2205(18) 1_655 ? 
O5W H9W 0.813(16) . ? 
O5W H10W 0.880(16) . ? 
O6W H11W 0.864(15) . ? 
O6W H12W 0.919(16) . ? 
 
loop_ 
 _geom_angle_atom_site_label_1 
 _geom_angle_atom_site_label_2 
 _geom_angle_atom_site_label_3 
 _geom_angle 
 _geom_angle_site_symmetry_1 
 _geom_angle_site_symmetry_3 
 _geom_angle_publ_flag 
O3 Ca1 O4 103.72(5) 2_676 1_455 ? 
O3 Ca1 O1 97.90(4) 2_676 2_576 ? 
O4 Ca1 O1 87.25(5) 1_455 2_576 ? 
O3 Ca1 O1W 172.27(5) 2_676 . ? 
O4 Ca1 O1W 82.07(5) 1_455 . ? 
O1 Ca1 O1W 87.40(5) 2_576 . ? 
O3 Ca1 O2W 97.47(5) 2_676 . ? 
O4 Ca1 O2W 158.27(5) 1_455 . ? 
O1 Ca1 O2W 94.62(5) 2_576 . ? 
O1W Ca1 O2W 76.40(5) . . ? 
O3 Ca1 N1 93.52(5) 2_676 . ? 
O4 Ca1 N1 83.05(5) 1_455 . ? 
O1 Ca1 N1 166.49(5) 2_576 . ? 
O1W Ca1 N1 81.98(5) . . ? 
O2W Ca1 N1 90.99(5) . . ? 
O3 Ca1 C8 84.74(5) 2_676 1_455 ? 
O4 Ca1 C8 18.99(4) 1_455 1_455 ? 
O1 Ca1 C8 89.40(4) 2_576 1_455 ? 
O1W Ca1 C8 101.01(5) . 1_455 ? 
O2W Ca1 C8 175.09(5) . 1_455 ? 
N1 Ca1 C8 84.48(5) . 1_455 ? 
C8 O3 Ca1 158.22(12) . 2_676 ? 
C1 O1 Ca1 128.30(11) . 2_576 ? 
Ca1 O1W H1W 123.4(15) . . ? 
Ca1 O1W H2W 127.8(14) . . ? 
H1W O1W H2W 107.5(17) . . ? 
C4 N1 Ca1 113.21(11) . . ? 
C4 N1 H1A 115.4(13) . . ? 
Ca1 N1 H1A 103.3(13) . . ? 
C4 N1 H2A 110.6(13) . . ? 
Ca1 N1 H2A 107.0(14) . . ? 
H1A N1 H2A 106.7(19) . . ? 
C8 O4 Ca1 124.08(11) . 1_655 ? 
C4 C5 C6 120.37(16) . . ? 
C4 C5 H5 119.8 . . ? 
C6 C5 H5 119.8 . . ? 
C5 C4 C3 119.79(16) . . ? 
C5 C4 N1 120.77(15) . . ? 
C3 C4 N1 119.24(16) . . ? 
Ca1 O2W H3W 130.1(14) . . ? 
Ca1 O2W H4W 115.2(14) . . ? 
H3W O2W H4W 110.0(17) . . ? 
C2 C3 C4 120.14(16) . . ? 
C2 C3 H3 119.9 . . ? 
C4 C3 H3 119.9 . . ? 
C7 C6 C5 119.49(16) . . ? 
C7 C6 C8 119.20(15) . . ? 
C5 C6 C8 121.27(15) . . ? 
C3 C2 C7 119.57(16) . . ? 
C3 C2 C1 120.45(16) . . ? 
C7 C2 C1 119.89(15) . . ? 
C6 C7 C2 120.58(16) . . ? 
C6 C7 H7 119.7 . . ? 
C2 C7 H7 119.7 . . ? 
O7 Ca2 O8 101.43(5) 1_655 2_475 ? 
O7 Ca2 O6 93.46(4) 1_655 . ? 
O8 Ca2 O6 89.21(5) 2_475 . ? 
O7 Ca2 O3W 175.79(5) 1_655 . ? 
O8 Ca2 O3W 82.74(5) 2_475 . ? 
O6 Ca2 O3W 87.07(5) . . ? 
O7 Ca2 O4W 96.69(5) 1_655 . ? 
O8 Ca2 O4W 160.92(5) 2_475 . ? 
O6 Ca2 O4W 95.64(5) . . ? 
O3W Ca2 O4W 79.10(5) . . ? 
O7 Ca2 N2 95.33(5) 1_655 2_575 ? 
O8 Ca2 N2 83.60(5) 2_475 2_575 ? 
O6 Ca2 N2 169.59(5) . 2_575 ? 
O3W Ca2 N2 84.57(5) . 2_575 ? 
O4W Ca2 N2 88.86(5) . 2_575 ? 
O7 Ca2 C16 83.61(4) 1_655 2_475 ? 
O8 Ca2 C16 17.87(4) 2_475 2_475 ? 
O6 Ca2 C16 89.06(4) . 2_475 ? 
O3W Ca2 C16 100.58(5) . 2_475 ? 
O4W Ca2 C16 175.27(5) . 2_475 ? 
N2 Ca2 C16 86.41(5) 2_575 2_475 ? 
C16 O8 Ca2 127.93(11) . 2_475 ? 
C9 O6 Ca2 127.09(11) . . ? 
C16 O7 Ca2 157.91(12) . 1_455 ? 
Ca2 O3W H5W 117.2(14) . . ? 
Ca2 O3W H6W 124.7(15) . . ? 
H5W O3W H6W 113.6(18) . . ? 
C12 C13 C14 119.93(16) . . ? 
C12 C13 H13 120.0 . . ? 
C14 C13 H13 120.0 . . ? 
C12 N2 Ca2 112.39(11) . 2_575 ? 
C12 N2 H3A 113.2(13) . . ? 
Ca2 N2 H3A 102.4(14) 2_575 . ? 
C12 N2 H4A 114.5(13) . . ? 
Ca2 N2 H4A 107.3(13) 2_575 . ? 
H3A N2 H4A 106.1(18) . . ? 
Ca2 O4W H7W 130.6(14) . . ? 
Ca2 O4W H8W 113.0(14) . . ? 
H7W O4W H8W 110.6(17) . . ? 
O8 C16 O7 124.29(17) . . ? 
O8 C16 C14 118.14(15) . . ? 
O7 C16 C14 117.57(15) . . ? 
O7 C16 Ca2 94.14(10) . 2_475 ? 
C14 C16 Ca2 143.95(11) . 2_475 ? 
O5 C9 O6 123.07(16) . . ? 
O5 C9 C10 118.30(16) . . ? 
O6 C9 C10 118.63(15) . . ? 
C15 C14 C13 119.59(16) . . ? 
C15 C14 C16 119.16(15) . . ? 
C13 C14 C16 121.19(15) . . ? 
C14 C15 C10 120.86(15) . . ? 
C14 C15 H15 119.6 . . ? 
C10 C15 H15 119.6 . . ? 
C15 C10 C11 119.59(16) . . ? 
C15 C10 C9 119.36(15) . . ? 
C11 C10 C9 121.00(16) . . ? 
C13 C12 C11 120.15(16) . . ? 
C13 C12 N2 120.72(15) . . ? 
C11 C12 N2 118.95(16) . . ? 
C10 C11 C12 119.84(16) . . ? 
C10 C11 H11 120.1 . . ? 
C12 C11 H11 120.1 . . ? 
O3 C8 O4 123.93(16) . . ? 
O3 C8 C6 118.14(15) . . ? 
O4 C8 C6 117.92(15) . . ? 
O3 C8 Ca1 90.22(10) . 1_655 ? 
C6 C8 Ca1 147.15(12) . 1_655 ? 
O2 C1 O1 123.16(16) . . ? 
O2 C1 C2 118.73(16) . . ? 
O1 C1 C2 118.11(15) . . ? 
H9W O5W H10W 111(2) . . ? 
H11W O6W H12W 111.7(18) . . ? 
 
loop_ 
 _geom_torsion_atom_site_label_1 
 _geom_torsion_atom_site_label_2 
 _geom_torsion_atom_site_label_3 
 _geom_torsion_atom_site_label_4 
 _geom_torsion 
 _geom_torsion_site_symmetry_1 
 _geom_torsion_site_symmetry_2 
 _geom_torsion_site_symmetry_3 
 _geom_torsion_site_symmetry_4 
 _geom_torsion_publ_flag 
O3 Ca1 N1 C4 -9.74(12) 2_676 . . . ? 
O4 Ca1 N1 C4 -113.15(12) 1_455 . . . ? 
O1 Ca1 N1 C4 -157.54(17) 2_576 . . . ? 
O1W Ca1 N1 C4 163.93(12) . . . . ? 
O2W Ca1 N1 C4 87.81(12) . . . . ? 
C8 Ca1 N1 C4 -94.10(12) 1_455 . . . ? 
C6 C5 C4 C3 1.7(3) . . . . ? 
C6 C5 C4 N1 176.51(16) . . . . ? 
Ca1 N1 C4 C5 -99.00(17) . . . . ? 
Ca1 N1 C4 C3 75.86(17) . . . . ? 
C5 C4 C3 C2 -0.6(3) . . . . ? 
N1 C4 C3 C2 -175.48(16) . . . . ? 
C4 C5 C6 C7 -0.8(3) . . . . ? 
C4 C5 C6 C8 -178.53(16) . . . . ? 
C4 C3 C2 C7 -1.4(3) . . . . ? 
C4 C3 C2 C1 175.15(16) . . . . ? 
C5 C6 C7 C2 -1.3(3) . . . . ? 
C8 C6 C7 C2 176.54(16) . . . . ? 
C3 C2 C7 C6 2.4(3) . . . . ? 
C1 C2 C7 C6 -174.25(16) . . . . ? 
O7 Ca2 O6 C9 -103.40(13) 1_655 . . . ? 
O8 Ca2 O6 C9 -1.99(13) 2_475 . . . ? 
O3W Ca2 O6 C9 80.79(14) . . . . ? 
O4W Ca2 O6 C9 159.53(13) . . . . ? 
N2 Ca2 O6 C9 44.2(3) 2_575 . . . ? 
C16 Ca2 O6 C9 -19.86(13) 2_475 . . . ? 
Ca2 O8 C16 O7 32.0(2) 2_475 . . . ? 
Ca2 O8 C16 C14 -147.59(12) 2_475 . . . ? 
Ca2 O7 C16 O8 -114.2(3) 1_455 . . . ? 
Ca2 O7 C16 C14 65.4(4) 1_455 . . . ? 
Ca2 O7 C16 Ca2 -96.8(3) 1_455 . . 2_475 ? 
Ca2 O6 C9 O5 -107.64(17) . . . . ? 
Ca2 O6 C9 C10 72.18(19) . . . . ? 
C12 C13 C14 C15 0.8(3) . . . . ? 
C12 C13 C14 C16 177.91(16) . . . . ? 
O8 C16 C14 C15 179.26(16) . . . . ? 
O7 C16 C14 C15 -0.3(2) . . . . ? 
Ca2 C16 C14 C15 148.46(15) 2_475 . . . ? 
O8 C16 C14 C13 2.1(3) . . . . ? 
O7 C16 C14 C13 -177.47(16) . . . . ? 
Ca2 C16 C14 C13 -28.7(3) 2_475 . . . ? 
C13 C14 C15 C10 0.8(3) . . . . ? 
C16 C14 C15 C10 -176.34(16) . . . . ? 
C14 C15 C10 C11 -1.6(3) . . . . ? 
C14 C15 C10 C9 175.68(16) . . . . ? 
O5 C9 C10 C15 6.3(3) . . . . ? 
O6 C9 C10 C15 -173.56(16) . . . . ? 
O5 C9 C10 C11 -176.52(16) . . . . ? 
O6 C9 C10 C11 3.7(3) . . . . ? 
C14 C13 C12 C11 -1.7(3) . . . . ? 
C14 C13 C12 N2 -176.78(16) . . . . ? 
Ca2 N2 C12 C13 103.50(16) 2_575 . . . ? 
Ca2 N2 C12 C11 -71.66(17) 2_575 . . . ? 
C15 C10 C11 C12 0.7(3) . . . . ? 
C9 C10 C11 C12 -176.54(16) . . . . ? 
C13 C12 C11 C10 0.9(3) . . . . ? 
N2 C12 C11 C10 176.14(16) . . . . ? 
Ca1 O3 C8 O4 119.8(3) 2_676 . . . ? 
Ca1 O3 C8 C6 -58.9(4) 2_676 . . . ? 
Ca1 O3 C8 Ca1 103.7(3) 2_676 . . 1_655 ? 
Ca1 O4 C8 O3 -27.5(2) 1_655 . . . ? 
Ca1 O4 C8 C6 151.33(12) 1_655 . . . ? 
C7 C6 C8 O3 -0.7(2) . . . . ? 
C5 C6 C8 O3 177.04(16) . . . . ? 
C7 C6 C8 O4 -179.57(16) . . . . ? 
C5 C6 C8 O4 -1.8(3) . . . . ? 
C7 C6 C8 Ca1 -147.47(16) . . . 1_655 ? 
C5 C6 C8 Ca1 30.3(3) . . . 1_655 ? 
Ca1 O1 C1 O2 113.13(17) 2_576 . . . ? 
Ca1 O1 C1 C2 -66.8(2) 2_576 . . . ? 
C3 C2 C1 O2 174.45(16) . . . . ? 
C7 C2 C1 O2 -9.0(3) . . . . ? 
C3 C2 C1 O1 -5.7(2) . . . . ? 
C7 C2 C1 O1 170.92(16) . . . . ? 
 
loop_ 
 _geom_hbond_atom_site_label_D 
 _geom_hbond_atom_site_label_H 
 _geom_hbond_atom_site_label_A 
 _geom_hbond_distance_DH 
 _geom_hbond_distance_HA 
 _geom_hbond_distance_DA 
 _geom_hbond_angle_DHA 
 _geom_hbond_site_symmetry_A 
O1W H1W O5W  0.849(15) 2.066(17) 2.847(2) 153(2) . 
O1W H2W O1  0.918(15) 1.853(16) 2.7623(18) 171(2) 1_545 
N1 H1A O6W  0.878(15) 2.137(15) 3.014(2) 176.3(19) 2_566 
N1 H2A O6  0.868(15) 2.352(17) 3.169(2) 157.1(18) 1_556 
O2W H3W O2  0.882(15) 2.002(16) 2.8653(19) 166(2) 2_676 
O2W H4W O2  0.889(15) 1.904(16) 2.7742(18) 166(2) 1_545 
O3W H5W O6W  0.867(15) 1.910(16) 2.771(2) 172(2) . 
O3W H6W O6  0.869(15) 1.962(16) 2.8226(18) 171(2) 2_565 
N2 H3A O1  0.875(15) 2.375(16) 3.209(2) 159.6(18) 1_554 
N2 H4A O5W  0.890(15) 2.274(15) 3.155(2) 170.1(18) 1_564 
O4W H7W O5  0.889(15) 2.000(16) 2.8825(19) 172(2) 1_655 
O4W H8W O5  0.886(15) 1.876(17) 2.7308(17) 161(2) 2_565 
O5W H9W O1W  0.813(16) 2.45(3) 2.847(2) 111(2) . 
O5W H9W O4  0.813(16) 2.37(2) 3.097(2) 150(2) 1_455 
O5W H10W O5  0.880(16) 1.892(17) 2.768(2) 173(3) 1_556 
O6W H11W O2  0.864(15) 2.10(2) 2.836(2) 143(2) 2_576 
O6W H12W O5W  0.919(16) 1.858(16) 2.774(3) 175.2(19) 2_466 
 
_diffrn_measured_fraction_theta_max    0.991 
_diffrn_reflns_theta_full              25.03 
_diffrn_measured_fraction_theta_full   0.991 
_refine_diff_density_max    0.352 
_refine_diff_density_min   -0.266 
_refine_diff_density_rms    0.050 

#============================================================================#
#      Luis Cunha-Silva @ REQUIMTE & DQB FCUP  *  31/01/2020  *   END        #
#============================================================================#
