# Supplementary material for: From Discrete Complexes to Metal–Organic Layered Materials: Remarkable Hydrogen Bonding Frameworks
Source: Molecules. 2020 Mar 16;25(6):1353. doi: 10.3390/molecules25061353 (PMC7146137; doi:10.3390/molecules25061353)
Supplement: Supplementary file 1 [file molecules-25-01353-s001.zip › 4_LCS1013.CIF]

data_general

_publ_contact_author_name         'Dr Lu\'is Cunha Silva'
_publ_contact_author_address
; LAQV/REQUIMTE & Dep. of Chemistry and Biochemistry
  Faculty of Sciences
  University of Porto
  4169-007 Porto
  Portugal
;

_publ_contact_author_email        'l.cunha.silva@fc.up.pt'
_publ_contact_author_fax          '+351 220402576'
_publ_contact_author_phone        '+351 220402659'

_journal_name_full                'Molecules'

loop_
_publ_author_name
_publ_author_footnote
_publ_author_address

'Carla, Queir\\'os'  .
; LAQV/REQUIMTE & Dep. of Chemistry and Biochemistry
  Faculty of Sciences
  University of Porto
  4169-007 Porto
  Portugal
; 

'Silva, Ana M. G.'  .
; LAQV/REQUIMTE & Dep. of Chemistry and Biochemistry
  Faculty of Sciences
  University of Porto
  4169-007 Porto
  Portugal
;

'Castro, Baltazar de'  .
; LAQV/REQUIMTE & Dep. of Chemistry and Biochemistry
  Faculty of Sciences
  University of Porto
  4169-007 Porto
  Portugal
;

'Cunha-Silva, Lu\'is'  .
; LAQV/REQUIMTE & Dep. of Chemistry and Biochemistry
  Faculty of Sciences
  University of Porto
  4169-007 Porto
  Portugal
;

 
data_lcs1013 
 
# ========================================================================= #
 
_audit_creation_method            'SHELXL-97, manual editing plus enCIFer'
_audit_creation_date              '13 March 2014'

# ========================================================================= #

_chemical_name_systematic 
; 
 ? 
; 
_chemical_name_common             ? 
_chemical_melting_point           ? 
_chemical_formula_moiety          'C20 H17 Ca N3 O6, C12 H8 N2, H2 O' 
_chemical_formula_sum             'C32 H27 Ca N5 O7' 
_chemical_formula_weight          633.67 
 
loop_ 
 _atom_type_symbol 
 _atom_type_description 
 _atom_type_scat_dispersion_real 
 _atom_type_scat_dispersion_imag 
 _atom_type_scat_source 
 'C'  'C'   0.0033   0.0016 
 'International Tables Vol C Tables 4.2.6.8 and 6.1.1.4' 
 'H'  'H'   0.0000   0.0000 
 'International Tables Vol C Tables 4.2.6.8 and 6.1.1.4' 
 'N'  'N'   0.0061   0.0033 
 'International Tables Vol C Tables 4.2.6.8 and 6.1.1.4' 
 'O'  'O'   0.0106   0.0060 
 'International Tables Vol C Tables 4.2.6.8 and 6.1.1.4' 
 'Ca'  'Ca'   0.2262   0.3064 
 'International Tables Vol C Tables 4.2.6.8 and 6.1.1.4' 
 
_symmetry_cell_setting            monoclinic 
_symmetry_space_group_name_H-M    'P 21' 
_symmetry_space_group_name_Hall   'P 2yb'
 
loop_ 
 _symmetry_equiv_pos_as_xyz 
 'x, y, z' 
 '-x, y+1/2, -z' 
 
_cell_length_a                    8.2128(14) 
_cell_length_b                    17.373(3) 
_cell_length_c                    10.127(2) 
_cell_angle_alpha                 90.00 
_cell_angle_beta                  93.105(10) 
_cell_angle_gamma                 90.00 
_cell_volume                      1442.8(5) 
_cell_formula_units_Z             2 
_cell_measurement_temperature     150(2) 
_cell_measurement_reflns_used     2166 
_cell_measurement_theta_min       2.33 
_cell_measurement_theta_max       23.91 
 
_exptl_crystal_description        prism 
_exptl_crystal_colour             colourless 
_exptl_crystal_size_max           0.27 
_exptl_crystal_size_mid           0.15 
_exptl_crystal_size_min           0.10 
_exptl_crystal_density_meas       ? 
_exptl_crystal_density_diffrn     1.459 
_exptl_crystal_density_method     'not measured' 
_exptl_crystal_F_000              660 
_exptl_absorpt_coefficient_mu     0.277 
_exptl_absorpt_correction_type    multi-scan 
_exptl_absorpt_correction_T_min   0.9289 
_exptl_absorpt_correction_T_max   0.9728 
_exptl_absorpt_process_details    
;
 SADABS (Sheldrick, 1997)
;     
 
_exptl_special_details 
; 
 ? 
; 
 
_diffrn_ambient_temperature       150(2) 
_diffrn_radiation_wavelength      0.71073 
_diffrn_radiation_type            MoK\a 
_diffrn_radiation_source          'fine-focus sealed tube' 
_diffrn_radiation_monochromator   graphite 
_diffrn_measurement_device_type   'Bruker X8 Kappa CCD APEX II'
_diffrn_measurement_method        'omega/phi scans'
_diffrn_detector_area_resol_mean  ? 
_diffrn_standards_number          ? 
_diffrn_standards_interval_count  ? 
_diffrn_standards_interval_time   ? 
_diffrn_standards_decay_%         ? 
_diffrn_reflns_number             13902 
_diffrn_reflns_av_R_equivalents   0.0703 
_diffrn_reflns_av_sigmaI/netI     0.0971 
_diffrn_reflns_limit_h_min        -9 
_diffrn_reflns_limit_h_max        8 
_diffrn_reflns_limit_k_min        -20 
_diffrn_reflns_limit_k_max        20 
_diffrn_reflns_limit_l_min        -12 
_diffrn_reflns_limit_l_max        12 
_diffrn_reflns_theta_min          3.90 
_diffrn_reflns_theta_max          25.02 
_reflns_number_total              5042 
_reflns_number_gt                 3917 
_reflns_threshold_expression      >2sigma(I) 
 
_computing_data_collection        'APEX2 (Bruker, 2006)' 
_computing_cell_refinement        'APEX2 '
_computing_data_reduction         'SAINT+ (Bruker, 1997-2005)' 
_computing_structure_solution     'SHELXTL (Bruker 2001)' 
_computing_structure_refinement   'SHELXTL '
_computing_molecular_graphics     'SHELXTL ' 
_computing_publication_material   'SHELXTL ' 
 
_refine_special_details 
; 
 Refinement of F^2^ against ALL reflections.  The weighted R-factor wR and 
 goodness of fit S are based on F^2^, conventional R-factors R are based 
 on F, with F set to zero for negative F^2^. The threshold expression of 
 F^2^ > 2sigma(F^2^) is used only for calculating R-factors(gt) etc. and is 
 not relevant to the choice of reflections for refinement.  R-factors based 
 on F^2^ are statistically about twice as large as those based on F, and R- 
 factors based on ALL data will be even larger. 
; 
 
_refine_ls_structure_factor_coef  Fsqd  
_refine_ls_matrix_type            full 
_refine_ls_weighting_scheme       calc  
_refine_ls_weighting_details 
 'calc w=1/[\s^2^(Fo^2^)+(0.0594P)^2^+1.6295P] where P=(Fo^2^+2Fc^2^)/3' 
_atom_sites_solution_primary      direct 
_atom_sites_solution_secondary    difmap 
_atom_sites_solution_hydrogens    geom 
_refine_ls_hydrogen_treatment     mixed 
_refine_ls_extinction_method      none 
_refine_ls_extinction_coef        ? 
_refine_ls_abs_structure_details 
 'Flack H D (1983), Acta Cryst. A39, 876-881' 
_refine_ls_abs_structure_Flack    -0.06(6) 
_refine_ls_number_reflns          5042 
_refine_ls_number_parameters      430 
_refine_ls_number_restraints      13 
_refine_ls_R_factor_all           0.0918 
_refine_ls_R_factor_gt            0.0648 
_refine_ls_wR_factor_ref          0.1554 
_refine_ls_wR_factor_gt           0.1404 
_refine_ls_goodness_of_fit_ref    1.082 
_refine_ls_restrained_S_all       1.080 
_refine_ls_shift/su_max           0.000 
_refine_ls_shift/su_mean          0.000 
 
loop_ 
 _atom_site_label 
 _atom_site_type_symbol 
 _atom_site_fract_x 
 _atom_site_fract_y 
 _atom_site_fract_z 
 _atom_site_U_iso_or_equiv 
 _atom_site_adp_type 
 _atom_site_occupancy 
 _atom_site_symmetry_multiplicity 
 _atom_site_calc_flag 
 _atom_site_refinement_flags 
 _atom_site_disorder_assembly 
 _atom_site_disorder_group 
Ca1 Ca 0.12096(12) 0.42922(6) 0.72101(10) 0.0137(3) Uani 1 1 d . . . 
O1 O 0.1737(4) 0.3219(2) 0.8459(4) 0.0195(9) Uani 1 1 d . . . 
O2 O 0.4315(4) 0.2876(2) 0.8260(4) 0.0224(10) Uani 1 1 d . . . 
O3 O -0.1987(4) 0.1255(2) 1.0230(4) 0.0185(9) Uani 1 1 d . . . 
O1W O -0.1514(5) 0.3868(2) 0.7351(4) 0.0229(9) Uani 1 1 d D . . 
H1W H -0.133(6) 0.341(2) 0.774(6) 0.034 Uiso 1 1 d D . . 
H2W H -0.262(3) 0.389(3) 0.716(6) 0.034 Uiso 1 1 d D . . 
O2W O 0.4115(4) 0.4268(2) 0.7193(3) 0.0161(8) Uani 1 1 d D . . 
H3W H 0.445(6) 0.385(2) 0.764(5) 0.024 Uiso 1 1 d D . . 
H4W H 0.475(5) 0.439(3) 0.655(4) 0.024 Uiso 1 1 d D . . 
N1 N 0.0032(6) 0.4932(3) 0.5122(5) 0.0212(11) Uani 1 1 d . . . 
N2 N 0.1720(6) 0.3570(3) 0.5137(4) 0.0183(10) Uani 1 1 d . . . 
N5 N 0.5136(6) 0.0745(3) 1.1616(6) 0.0236(12) Uani 1 1 d D . . 
H1A H 0.495(6) 0.0262(16) 1.178(7) 0.035 Uiso 1 1 d D . . 
H2A H 0.616(4) 0.081(3) 1.141(6) 0.035 Uiso 1 1 d D . . 
C7 C 0.3808(6) 0.1072(3) 1.0977(5) 0.0169(12) Uani 1 1 d . . . 
O4 O -0.0962(5) 0.0391(2) 1.1643(4) 0.0228(10) Uani 1 1 d . . . 
O3W O 0.7484(5) 0.2433(3) 0.8272(4) 0.0299(10) Uani 1 1 d D . . 
H5W H 0.638(3) 0.245(4) 0.824(7) 0.045 Uiso 1 1 d D . . 
H6W H 0.783(6) 0.205(3) 0.881(6) 0.045 Uiso 1 1 d D . . 
C3 C 0.1139(6) 0.1860(3) 0.9820(5) 0.0135(12) Uani 1 1 d . . . 
H3 H 0.0232 0.2142 0.9454 0.016 Uiso 1 1 calc R . . 
C6 C 0.2237(6) 0.0843(3) 1.1187(5) 0.0136(12) Uani 1 1 d . . . 
H6 H 0.2082 0.0412 1.1744 0.016 Uiso 1 1 calc R . . 
C4 C 0.0883(7) 0.1208(3) 1.0629(5) 0.0173(12) Uani 1 1 d . . . 
C2 C 0.2677(7) 0.2080(3) 0.9569(5) 0.0163(12) Uani 1 1 d . . . 
C17 C 0.0214(7) 0.4567(3) 0.3947(6) 0.0181(13) Uani 1 1 d . . . 
C1 C 0.2938(6) 0.2784(3) 0.8695(6) 0.0154(12) Uani 1 1 d . . . 
C16 C 0.1113(6) 0.3855(3) 0.3951(6) 0.0171(12) Uani 1 1 d . . . 
C18 C 0.2280(7) 0.2803(3) 0.2789(6) 0.0224(13) Uani 1 1 d . . . 
H18 H 0.2474 0.2535 0.1995 0.027 Uiso 1 1 calc R . . 
C15 C 0.1366(7) 0.3485(3) 0.2741(5) 0.0172(13) Uani 1 1 d . . . 
C19 C 0.2894(7) 0.2522(3) 0.3978(6) 0.0225(13) Uani 1 1 d . . . 
H19 H 0.3517 0.2061 0.4019 0.027 Uiso 1 1 calc R . . 
C11 C -0.1341(8) 0.5545(3) 0.2773(7) 0.0283(15) Uani 1 1 d . . . 
H11 H -0.1842 0.5753 0.1984 0.034 Uiso 1 1 calc R . . 
C20 C 0.2583(7) 0.2928(3) 0.5133(6) 0.0224(14) Uani 1 1 d . . . 
H20 H 0.3016 0.2733 0.5955 0.027 Uiso 1 1 calc R . . 
C8 C 0.4020(6) 0.1703(3) 1.0130(5) 0.0151(12) Uani 1 1 d . . . 
H8 H 0.5087 0.1868 0.9946 0.018 Uiso 1 1 calc R . . 
C12 C -0.0431(7) 0.4857(3) 0.2738(6) 0.0208(13) Uani 1 1 d . . . 
C9 C -0.0791(8) 0.5576(3) 0.5111(6) 0.0253(14) Uani 1 1 d . . . 
H9 H -0.0920 0.5832 0.5927 0.030 Uiso 1 1 calc R . . 
C14 C 0.0690(7) 0.3803(4) 0.1533(6) 0.0247(14) Uani 1 1 d . . . 
H14 H 0.0860 0.3553 0.0718 0.030 Uiso 1 1 calc R . . 
C10 C -0.1492(8) 0.5906(3) 0.3955(6) 0.0285(15) Uani 1 1 d . . . 
H10 H -0.2069 0.6379 0.3994 0.034 Uiso 1 1 calc R . . 
C13 C -0.0189(7) 0.4459(3) 0.1549(6) 0.0284(16) Uani 1 1 d . . . 
H13 H -0.0656 0.4658 0.0741 0.034 Uiso 1 1 calc R . . 
N3 N 0.5138(6) 0.4788(3) 0.4811(5) 0.0250(12) Uani 1 1 d . . . 
C29 C 0.5405(7) 0.4432(3) 0.3657(5) 0.0198(13) Uani 1 1 d . . . 
N4 N 0.6833(6) 0.3422(3) 0.4879(5) 0.0248(12) Uani 1 1 d . . . 
C28 C 0.6249(7) 0.3695(3) 0.3705(6) 0.0218(13) Uani 1 1 d . . . 
C27 C 0.6477(7) 0.3309(3) 0.2504(6) 0.0247(14) Uani 1 1 d . . . 
C32 C 0.7594(8) 0.2741(4) 0.4881(7) 0.0311(16) Uani 1 1 d . . . 
H32 H 0.8014 0.2543 0.5705 0.037 Uiso 1 1 calc R . . 
C21 C 0.4384(8) 0.5474(4) 0.4762(7) 0.0320(15) Uani 1 1 d . . . 
H21 H 0.4239 0.5740 0.5567 0.038 Uiso 1 1 calc R . . 
C30 C 0.7282(8) 0.2592(4) 0.2568(7) 0.0325(16) Uani 1 1 d . . . 
H30 H 0.7453 0.2313 0.1781 0.039 Uiso 1 1 calc R . . 
C25 C 0.5105(7) 0.4311(5) 0.1243(6) 0.0322(14) Uani 1 1 d . . . 
H25 H 0.4724 0.4519 0.0415 0.039 Uiso 1 1 calc R . . 
C26 C 0.5886(8) 0.3633(4) 0.1269(6) 0.0311(15) Uani 1 1 d . . . 
H26 H 0.6046 0.3367 0.0467 0.037 Uiso 1 1 calc R . . 
C23 C 0.4025(8) 0.5438(4) 0.2420(7) 0.0362(17) Uani 1 1 d . . . 
H23 H 0.3628 0.5661 0.1608 0.043 Uiso 1 1 calc R . . 
C31 C 0.7809(8) 0.2306(4) 0.3759(7) 0.0337(16) Uani 1 1 d . . . 
H31 H 0.8317 0.1815 0.3823 0.040 Uiso 1 1 calc R . . 
C24 C 0.4833(7) 0.4729(4) 0.2422(6) 0.0240(14) Uani 1 1 d . . . 
C22 C 0.3809(9) 0.5810(4) 0.3587(7) 0.0359(17) Uani 1 1 d . . . 
H22 H 0.3270 0.6293 0.3593 0.043 Uiso 1 1 calc R . . 
C5 C -0.0788(7) 0.0943(3) 1.0845(5) 0.0159(12) Uani 1 1 d . . . 
 
loop_ 
 _atom_site_aniso_label 
 _atom_site_aniso_U_11 
 _atom_site_aniso_U_22 
 _atom_site_aniso_U_33 
 _atom_site_aniso_U_23 
 _atom_site_aniso_U_13 
 _atom_site_aniso_U_12 
Ca1 0.0177(5) 0.0105(5) 0.0131(5) -0.0005(5) 0.0012(4) 0.0014(5) 
O1 0.019(2) 0.022(2) 0.018(2) 0.0037(17) 0.0028(17) 0.0033(18) 
O2 0.011(2) 0.029(2) 0.027(3) 0.0114(19) 0.0044(18) 0.0050(18) 
O3 0.015(2) 0.020(2) 0.021(2) 0.0027(18) -0.0022(17) 0.0013(18) 
O1W 0.014(2) 0.029(2) 0.025(2) 0.0050(19) -0.0010(17) -0.0010(18) 
O2W 0.0242(19) 0.0094(17) 0.0151(19) 0.002(2) 0.0052(15) -0.0037(19) 
N1 0.027(3) 0.019(3) 0.018(3) 0.002(2) 0.003(2) 0.000(2) 
N2 0.027(3) 0.013(2) 0.015(3) 0.0027(19) 0.000(2) 0.001(2) 
N5 0.011(2) 0.026(3) 0.033(3) 0.011(2) 0.002(2) 0.002(2) 
C7 0.016(3) 0.018(3) 0.017(3) -0.007(2) -0.003(2) 0.007(2) 
O4 0.018(2) 0.020(2) 0.031(3) 0.0104(19) 0.0038(18) -0.0018(18) 
O3W 0.023(2) 0.033(3) 0.033(3) 0.015(2) -0.004(2) 0.004(2) 
C3 0.018(3) 0.009(3) 0.013(3) -0.004(2) -0.001(2) 0.007(2) 
C6 0.016(3) 0.010(3) 0.016(3) -0.001(2) 0.003(2) 0.002(2) 
C4 0.019(3) 0.019(3) 0.014(3) -0.004(2) 0.002(2) -0.002(3) 
C2 0.018(3) 0.018(3) 0.013(3) -0.005(2) 0.003(2) 0.001(2) 
C17 0.017(3) 0.022(3) 0.015(3) 0.001(2) 0.001(2) 0.000(2) 
C1 0.015(3) 0.013(3) 0.018(3) -0.003(2) -0.001(2) 0.001(2) 
C16 0.013(3) 0.019(3) 0.020(3) 0.001(2) 0.004(2) -0.004(2) 
C18 0.030(3) 0.021(3) 0.018(3) -0.009(3) 0.009(3) -0.002(3) 
C15 0.020(3) 0.011(3) 0.022(3) -0.003(2) 0.007(2) -0.003(2) 
C19 0.024(3) 0.020(3) 0.023(3) -0.006(3) 0.001(3) 0.003(3) 
C11 0.036(4) 0.023(3) 0.026(4) 0.018(3) 0.002(3) 0.003(3) 
C20 0.025(3) 0.022(3) 0.019(3) -0.005(3) 0.000(3) -0.001(3) 
C8 0.013(3) 0.018(3) 0.015(3) 0.002(2) 0.005(2) -0.005(2) 
C12 0.026(3) 0.017(3) 0.020(3) 0.012(2) 0.004(3) -0.003(3) 
C9 0.043(4) 0.015(3) 0.019(3) 0.002(2) 0.005(3) 0.008(3) 
C14 0.034(4) 0.029(4) 0.011(3) 0.000(3) -0.001(3) 0.000(3) 
C10 0.037(4) 0.021(3) 0.028(4) 0.009(3) 0.007(3) 0.008(3) 
C13 0.028(3) 0.038(5) 0.020(3) 0.005(3) -0.004(3) 0.001(3) 
N3 0.038(3) 0.018(3) 0.020(3) -0.001(2) 0.008(2) -0.005(2) 
C29 0.019(3) 0.022(4) 0.018(3) 0.003(3) 0.004(2) -0.003(3) 
N4 0.037(3) 0.018(3) 0.018(3) 0.003(2) -0.001(2) -0.006(2) 
C28 0.024(3) 0.018(3) 0.023(3) -0.003(3) 0.001(3) -0.003(3) 
C27 0.025(3) 0.023(3) 0.027(4) -0.006(3) 0.004(3) -0.010(3) 
C32 0.040(4) 0.021(3) 0.030(4) 0.003(3) -0.008(3) -0.004(3) 
C21 0.047(4) 0.020(3) 0.030(4) 0.004(3) 0.010(3) 0.008(3) 
C30 0.036(4) 0.028(4) 0.035(4) -0.008(3) 0.009(3) 0.002(3) 
C25 0.040(4) 0.035(3) 0.021(3) 0.008(4) -0.003(3) -0.002(4) 
C26 0.038(4) 0.037(4) 0.018(3) -0.003(3) 0.003(3) 0.000(3) 
C23 0.036(4) 0.041(4) 0.031(4) 0.018(3) -0.002(3) 0.003(3) 
C31 0.041(4) 0.024(4) 0.036(4) -0.001(3) 0.000(3) 0.003(3) 
C24 0.023(3) 0.028(3) 0.022(3) 0.004(3) 0.003(3) -0.002(3) 
C22 0.049(4) 0.022(3) 0.037(4) 0.012(3) 0.005(3) 0.011(3) 
C5 0.021(3) 0.010(3) 0.017(3) -0.008(2) 0.002(2) -0.003(2) 
 
_geom_special_details 
; 
 All esds (except the esd in the dihedral angle between two l.s. planes) 
 are estimated using the full covariance matrix.  The cell esds are taken 
 into account individually in the estimation of esds in distances, angles 
 and torsion angles; correlations between esds in cell parameters are only 
 used when they are defined by crystal symmetry.  An approximate (isotropic) 
 treatment of cell esds is used for estimating esds involving l.s. planes. 
; 
 
loop_ 
 _geom_bond_atom_site_label_1 
 _geom_bond_atom_site_label_2 
 _geom_bond_distance 
 _geom_bond_site_symmetry_2 
 _geom_bond_publ_flag 
Ca1 O4 2.249(4) 2_557 ? 
Ca1 O1 2.282(4) . ? 
Ca1 O1W 2.366(4) . ? 
Ca1 O2W 2.388(4) . ? 
Ca1 N2 2.501(5) . ? 
Ca1 N1 2.534(5) . ?  
O1 C1 1.254(6) . ? 
O2 C1 1.246(7) . ? 
O3 C5 1.259(6) . ? 
O1W H1W 0.901(19) . ? 
O1W H2W 0.923(19) . ? 
O2W H3W 0.887(19) . ? 
O2W H4W 0.880(19) . ? 
N1 C9 1.307(7) . ? 
N1 C17 1.363(8) . ? 
N2 C20 1.321(7) . ? 
N2 C16 1.367(7) . ? 
N5 C7 1.362(7) . ? 
N5 H1A 0.871(19) . ? 
N5 H2A 0.88(2) . ? 
C7 C6 1.378(8) . ? 
C7 C8 1.408(8) . ? 
O4 C5 1.267(6) . ? 
O4 Ca1 2.249(4) 2_547 ? 
O3W H5W 0.91(2) . ? 
O3W H6W 0.899(19) . ? 
C3 C2 1.357(8) . ? 
C3 C4 1.420(8) . ? 
C3 H3 0.9500 . ? 
C6 C4 1.376(8) . ? 
C6 H6 0.9500 . ? 
C4 C5 1.475(8) . ? 
C2 C8 1.379(8) . ? 
C2 C1 1.531(8) . ? 
C17 C12 1.401(8) . ? 
C17 C16 1.440(8) . ? 
C16 C15 1.409(8) . ? 
C18 C19 1.370(8) . ? 
C18 C15 1.403(8) . ? 
C18 H18 0.9500 . ? 
C15 C14 1.427(8) . ? 
C19 C20 1.401(8) . ? 
C19 H19 0.9500 . ? 
C11 C10 1.364(9) . ? 
C11 C12 1.411(8) . ? 
C11 H11 0.9500 . ? 
C20 H20 0.9500 . ? 
C8 H8 0.9500 . ? 
C12 C13 1.412(9) . ? 
C9 C10 1.399(8) . ? 
C9 H9 0.9500 . ? 
C14 C13 1.350(9) . ? 
C14 H14 0.9500 . ? 
C10 H10 0.9500 . ? 
C13 H13 0.9500 . ? 
N3 C21 1.343(8) . ? 
N3 C29 1.350(7) . ? 
C29 C24 1.411(8) . ? 
C29 C28 1.455(8) . ? 
N4 C32 1.339(8) . ? 
N4 C28 1.344(7) . ? 
C28 C27 1.410(8) . ? 
C27 C30 1.409(9) . ? 
C27 C26 1.432(9) . ? 
C32 C31 1.384(9) . ? 
C32 H32 0.9500 . ? 
C21 C22 1.385(9) . ? 
C21 H21 0.9500 . ? 
C30 C31 1.354(9) . ? 
C30 H30 0.9500 . ? 
C25 C26 1.341(10) . ? 
C25 C24 1.425(9) . ? 
C25 H25 0.9500 . ? 
C26 H26 0.9500 . ? 
C23 C22 1.367(10) . ? 
C23 C24 1.398(9) . ? 
C23 H23 0.9500 . ? 
C31 H31 0.9500 . ? 
C22 H22 0.9500 . ? 
 
loop_ 
 _geom_angle_atom_site_label_1 
 _geom_angle_atom_site_label_2 
 _geom_angle_atom_site_label_3 
 _geom_angle 
 _geom_angle_site_symmetry_1 
 _geom_angle_site_symmetry_3 
 _geom_angle_publ_flag 
O4 Ca1 O1 115.29(14) 2_557 . ? 
O4 Ca1 O1W 96.95(15) 2_557 . ? 
O1 Ca1 O1W 82.18(14) . . ? 
O4 Ca1 O2W 97.87(14) 2_557 . ? 
O1 Ca1 O2W 80.19(14) . . ? 
O1W Ca1 O2W 160.59(15) . . ? 
O4 Ca1 N2 152.03(15) 2_557 . ? 
O1 Ca1 N2 91.14(14) . . ? 
O1W Ca1 N2 95.53(15) . . ? 
O2W Ca1 N2 76.83(14) . . ? 
O4 Ca1 N1 91.02(15) 2_557 . ? 
O1 Ca1 N1 150.86(15) . . ? 
O1W Ca1 N1 82.38(15) . . ? 
O2W Ca1 N1 109.77(15) . . ? 
N2 Ca1 N1 65.98(15) . . ? 
O4 Ca1 H1W 106.9(13) 2_557 . ? 
O1 Ca1 H1W 62.9(6) . . ? 
O1W Ca1 H1W 19.4(6) . . ? 
O2W Ca1 H1W 141.6(6) . . ? 
N2 Ca1 H1W 92.8(14) . . ? 
N1 Ca1 H1W 98.9(9) . . ? 
O4 Ca1 H3W 105.5(12) 2_557 . ? 
O1 Ca1 H3W 62.4(6) . . ? 
O1W Ca1 H3W 143.6(7) . . ? 
O2W Ca1 H3W 17.8(6) . . ? 
N2 Ca1 H3W 77.8(12) . . ? 
N1 Ca1 H3W 124.7(8) . . ? 
H1W Ca1 H3W 124.2(9) . . ? 
C1 O1 Ca1 136.2(4) . . ? 
Ca1 O1W H1W 100(3) . . ? 
Ca1 O1W H2W 154(3) . . ? 
H1W O1W H2W 106(3) . . ? 
Ca1 O2W H3W 107(3) . . ? 
Ca1 O2W H4W 130(3) . . ? 
H3W O2W H4W 112(3) . . ? 
C9 N1 C17 118.2(5) . . ? 
C9 N1 Ca1 123.8(4) . . ? 
C17 N1 Ca1 118.0(4) . . ? 
C20 N2 C16 118.2(5) . . ? 
C20 N2 Ca1 122.7(4) . . ? 
C16 N2 Ca1 119.1(4) . . ? 
C7 N5 H1A 110(4) . . ? 
C7 N5 H2A 126(4) . . ? 
H1A N5 H2A 110(3) . . ? 
N5 C7 C6 122.5(5) . . ? 
N5 C7 C8 119.5(5) . . ? 
C6 C7 C8 117.9(5) . . ? 
C5 O4 Ca1 171.1(4) . 2_547 ? 
H5W O3W H6W 109(3) . . ? 
C2 C3 C4 120.1(5) . . ? 
C2 C3 H3 119.9 . . ? 
C4 C3 H3 119.9 . . ? 
C4 C6 C7 123.1(5) . . ? 
C4 C6 H6 118.5 . . ? 
C7 C6 H6 118.5 . . ? 
C6 C4 C3 117.6(5) . . ? 
C6 C4 C5 122.2(5) . . ? 
C3 C4 C5 120.2(5) . . ? 
C3 C2 C8 121.4(5) . . ? 
C3 C2 C1 119.6(5) . . ? 
C8 C2 C1 118.9(5) . . ? 
N1 C17 C12 122.7(5) . . ? 
N1 C17 C16 118.5(5) . . ? 
C12 C17 C16 118.7(5) . . ? 
O2 C1 O1 125.1(5) . . ? 
O2 C1 C2 117.7(5) . . ? 
O1 C1 C2 117.2(5) . . ? 
N2 C16 C15 122.3(5) . . ? 
N2 C16 C17 118.4(5) . . ? 
C15 C16 C17 119.3(5) . . ? 
C19 C18 C15 120.1(5) . . ? 
C19 C18 H18 119.9 . . ? 
C15 C18 H18 119.9 . . ? 
C18 C15 C16 117.3(5) . . ? 
C18 C15 C14 122.7(5) . . ? 
C16 C15 C14 120.0(5) . . ? 
C18 C19 C20 118.6(5) . . ? 
C18 C19 H19 120.7 . . ? 
C20 C19 H19 120.7 . . ? 
C10 C11 C12 119.0(6) . . ? 
C10 C11 H11 120.5 . . ? 
C12 C11 H11 120.5 . . ? 
N2 C20 C19 123.3(5) . . ? 
N2 C20 H20 118.3 . . ? 
C19 C20 H20 118.3 . . ? 
C2 C8 C7 119.9(5) . . ? 
C2 C8 H8 120.1 . . ? 
C7 C8 H8 120.1 . . ? 
C17 C12 C11 117.3(5) . . ? 
C17 C12 C13 120.4(5) . . ? 
C11 C12 C13 122.3(5) . . ? 
N1 C9 C10 123.2(6) . . ? 
N1 C9 H9 118.4 . . ? 
C10 C9 H9 118.4 . . ? 
C13 C14 C15 120.0(6) . . ? 
C13 C14 H14 120.0 . . ? 
C15 C14 H14 120.0 . . ? 
C11 C10 C9 119.5(6) . . ? 
C11 C10 H10 120.2 . . ? 
C9 C10 H10 120.2 . . ? 
C14 C13 C12 121.5(5) . . ? 
C14 C13 H13 119.2 . . ? 
C12 C13 H13 119.2 . . ? 
C21 N3 C29 118.1(5) . . ? 
N3 C29 C24 122.5(5) . . ? 
N3 C29 C28 118.2(5) . . ? 
C24 C29 C28 119.2(5) . . ? 
C32 N4 C28 117.2(5) . . ? 
N4 C28 C27 122.5(5) . . ? 
N4 C28 C29 119.1(5) . . ? 
C27 C28 C29 118.4(5) . . ? 
C30 C27 C28 117.7(6) . . ? 
C30 C27 C26 121.6(6) . . ? 
C28 C27 C26 120.7(6) . . ? 
N4 C32 C31 124.2(6) . . ? 
N4 C32 H32 117.9 . . ? 
C31 C32 H32 117.9 . . ? 
N3 C21 C22 122.7(6) . . ? 
N3 C21 H21 118.6 . . ? 
C22 C21 H21 118.6 . . ? 
C31 C30 C27 119.5(6) . . ? 
C31 C30 H30 120.2 . . ? 
C27 C30 H30 120.2 . . ? 
C26 C25 C24 121.8(6) . . ? 
C26 C25 H25 119.1 . . ? 
C24 C25 H25 119.1 . . ? 
C25 C26 C27 120.1(6) . . ? 
C25 C26 H26 119.9 . . ? 
C27 C26 H26 119.9 . . ? 
C22 C23 C24 119.9(6) . . ? 
C22 C23 H23 120.1 . . ? 
C24 C23 H23 120.1 . . ? 
C30 C31 C32 118.8(6) . . ? 
C30 C31 H31 120.6 . . ? 
C32 C31 H31 120.6 . . ? 
C23 C24 C29 117.3(6) . . ? 
C23 C24 C25 122.9(6) . . ? 
C29 C24 C25 119.7(6) . . ? 
C23 C22 C21 119.3(6) . . ? 
C23 C22 H22 120.3 . . ? 
C21 C22 H22 120.3 . . ? 
O3 C5 O4 122.0(5) . . ? 
O3 C5 C4 120.0(5) . . ? 
O4 C5 C4 118.0(5) . . ? 
 
loop_ 
 _geom_torsion_atom_site_label_1 
 _geom_torsion_atom_site_label_2 
 _geom_torsion_atom_site_label_3 
 _geom_torsion_atom_site_label_4 
 _geom_torsion 
 _geom_torsion_site_symmetry_1 
 _geom_torsion_site_symmetry_2 
 _geom_torsion_site_symmetry_3 
 _geom_torsion_site_symmetry_4 
 _geom_torsion_publ_flag 
O4 Ca1 O1 C1 -108.2(5) 2_557 . . . ? 
O1W Ca1 O1 C1 157.8(5) . . . . ? 
O2W Ca1 O1 C1 -14.1(5) . . . . ? 
N2 Ca1 O1 C1 62.3(5) . . . . ? 
N1 Ca1 O1 C1 99.2(6) . . . . ? 
O4 Ca1 N1 C9 -17.3(5) 2_557 . . . ? 
O1 Ca1 N1 C9 138.1(5) . . . . ? 
O1W Ca1 N1 C9 79.6(5) . . . . ? 
O2W Ca1 N1 C9 -116.0(5) . . . . ? 
N2 Ca1 N1 C9 179.1(5) . . . . ? 
O4 Ca1 N1 C17 165.3(4) 2_557 . . . ? 
O1 Ca1 N1 C17 -39.2(6) . . . . ? 
O1W Ca1 N1 C17 -97.8(4) . . . . ? 
O2W Ca1 N1 C17 66.6(4) . . . . ? 
N2 Ca1 N1 C17 1.8(4) . . . . ? 
O4 Ca1 N2 C20 140.4(4) 2_557 . . . ? 
O1 Ca1 N2 C20 -21.2(4) . . . . ? 
O1W Ca1 N2 C20 -103.4(4) . . . . ? 
O2W Ca1 N2 C20 58.5(4) . . . . ? 
N1 Ca1 N2 C20 177.5(5) . . . . ? 
O4 Ca1 N2 C16 -38.3(6) 2_557 . . . ? 
O1 Ca1 N2 C16 160.2(4) . . . . ? 
O1W Ca1 N2 C16 77.9(4) . . . . ? 
O2W Ca1 N2 C16 -120.2(4) . . . . ? 
N1 Ca1 N2 C16 -1.2(4) . . . . ? 
N5 C7 C6 C4 174.7(5) . . . . ? 
C8 C7 C6 C4 -1.1(8) . . . . ? 
C7 C6 C4 C3 -1.2(8) . . . . ? 
C7 C6 C4 C5 178.7(5) . . . . ? 
C2 C3 C4 C6 3.1(8) . . . . ? 
C2 C3 C4 C5 -176.7(5) . . . . ? 
C4 C3 C2 C8 -2.8(8) . . . . ? 
C4 C3 C2 C1 -180.0(5) . . . . ? 
C9 N1 C17 C12 0.6(9) . . . . ? 
Ca1 N1 C17 C12 178.1(4) . . . . ? 
C9 N1 C17 C16 -179.7(5) . . . . ? 
Ca1 N1 C17 C16 -2.2(7) . . . . ? 
Ca1 O1 C1 O2 2.6(9) . . . . ? 
Ca1 O1 C1 C2 -176.4(3) . . . . ? 
C3 C2 C1 O2 -165.3(5) . . . . ? 
C8 C2 C1 O2 17.4(8) . . . . ? 
C3 C2 C1 O1 13.7(7) . . . . ? 
C8 C2 C1 O1 -163.5(5) . . . . ? 
C20 N2 C16 C15 0.6(8) . . . . ? 
Ca1 N2 C16 C15 179.3(4) . . . . ? 
C20 N2 C16 C17 -178.1(5) . . . . ? 
Ca1 N2 C16 C17 0.6(6) . . . . ? 
N1 C17 C16 N2 1.1(7) . . . . ? 
C12 C17 C16 N2 -179.2(5) . . . . ? 
N1 C17 C16 C15 -177.6(5) . . . . ? 
C12 C17 C16 C15 2.1(7) . . . . ? 
C19 C18 C15 C16 -0.3(8) . . . . ? 
C19 C18 C15 C14 -179.7(5) . . . . ? 
N2 C16 C15 C18 -0.1(8) . . . . ? 
C17 C16 C15 C18 178.6(5) . . . . ? 
N2 C16 C15 C14 179.4(5) . . . . ? 
C17 C16 C15 C14 -2.0(8) . . . . ? 
C15 C18 C19 C20 0.2(9) . . . . ? 
C16 N2 C20 C19 -0.7(8) . . . . ? 
Ca1 N2 C20 C19 -179.3(4) . . . . ? 
C18 C19 C20 N2 0.3(9) . . . . ? 
C3 C2 C8 C7 0.4(8) . . . . ? 
C1 C2 C8 C7 177.6(5) . . . . ? 
N5 C7 C8 C2 -174.4(5) . . . . ? 
C6 C7 C8 C2 1.6(8) . . . . ? 
N1 C17 C12 C11 -1.9(8) . . . . ? 
C16 C17 C12 C11 178.4(5) . . . . ? 
N1 C17 C12 C13 179.3(6) . . . . ? 
C16 C17 C12 C13 -0.4(8) . . . . ? 
C10 C11 C12 C17 2.6(8) . . . . ? 
C10 C11 C12 C13 -178.5(6) . . . . ? 
C17 N1 C9 C10 0.1(9) . . . . ? 
Ca1 N1 C9 C10 -177.3(5) . . . . ? 
C18 C15 C14 C13 179.5(6) . . . . ? 
C16 C15 C14 C13 0.1(8) . . . . ? 
C12 C11 C10 C9 -2.1(9) . . . . ? 
N1 C9 C10 C11 0.8(10) . . . . ? 
C15 C14 C13 C12 1.6(9) . . . . ? 
C17 C12 C13 C14 -1.5(9) . . . . ? 
C11 C12 C13 C14 179.7(6) . . . . ? 
C21 N3 C29 C24 -4.1(9) . . . . ? 
C21 N3 C29 C28 178.9(5) . . . . ? 
C32 N4 C28 C27 -2.9(9) . . . . ? 
C32 N4 C28 C29 179.7(5) . . . . ? 
N3 C29 C28 N4 -4.7(8) . . . . ? 
C24 C29 C28 N4 178.2(5) . . . . ? 
N3 C29 C28 C27 177.8(5) . . . . ? 
C24 C29 C28 C27 0.6(8) . . . . ? 
N4 C28 C27 C30 3.2(9) . . . . ? 
C29 C28 C27 C30 -179.4(5) . . . . ? 
N4 C28 C27 C26 -177.8(6) . . . . ? 
C29 C28 C27 C26 -0.3(8) . . . . ? 
C28 N4 C32 C31 -0.2(9) . . . . ? 
C29 N3 C21 C22 3.0(9) . . . . ? 
C28 C27 C30 C31 -0.4(9) . . . . ? 
C26 C27 C30 C31 -179.5(6) . . . . ? 
C24 C25 C26 C27 -0.2(10) . . . . ? 
C30 C27 C26 C25 179.1(6) . . . . ? 
C28 C27 C26 C25 0.1(9) . . . . ? 
C27 C30 C31 C32 -2.4(10) . . . . ? 
N4 C32 C31 C30 2.8(11) . . . . ? 
C22 C23 C24 C29 -0.5(9) . . . . ? 
C22 C23 C24 C25 -179.8(6) . . . . ? 
N3 C29 C24 C23 2.9(9) . . . . ? 
C28 C29 C24 C23 179.9(5) . . . . ? 
N3 C29 C24 C25 -177.8(6) . . . . ? 
C28 C29 C24 C25 -0.8(8) . . . . ? 
C26 C25 C24 C23 179.9(6) . . . . ? 
C26 C25 C24 C29 0.6(9) . . . . ? 
C24 C23 C22 C21 -0.5(10) . . . . ? 
N3 C21 C22 C23 -0.7(11) . . . . ? 
C6 C4 C5 O3 -174.2(5) . . . . ? 
C3 C4 C5 O3 5.6(8) . . . . ? 
C6 C4 C5 O4 4.7(8) . . . . ? 
C3 C4 C5 O4 -175.4(5) . . . . ? 
 
loop_ 
 _geom_hbond_atom_site_label_D 
 _geom_hbond_atom_site_label_H 
 _geom_hbond_atom_site_label_A 
 _geom_hbond_distance_DH 
 _geom_hbond_distance_HA 
 _geom_hbond_distance_DA 
 _geom_hbond_angle_DHA 
 _geom_hbond_site_symmetry_A 
O1W H1W O3W  0.901(19) 2.04(4) 2.802(6) 141(4) 1_455 
O1W H1W O1  0.901(19) 2.60(5) 3.056(5) 112(4) . 
O2W H3W O2  0.887(19) 1.81(3) 2.650(6) 156(5) . 
O2W H4W N3  0.880(19) 1.94(3) 2.750(6) 153(4) . 
N5 H1A O2W  0.871(19) 2.14(4) 2.887(6) 144(5) 2_647 
N5 H2A O3  0.88(2) 2.14(3) 2.950(6) 154(5) 1_655 
N5 H2A O4  0.88(2) 2.48(4) 3.262(6) 149(5) 1_655 
O3W H5W O2  0.91(2) 1.85(3) 2.714(5) 158(6) . 
O3W H6W O3  0.899(19) 1.99(3) 2.865(5) 165(6) 1_655 
 
_diffrn_measured_fraction_theta_max    0.994 
_diffrn_reflns_theta_full              25.02 
_diffrn_measured_fraction_theta_full   0.994 
_refine_diff_density_max    1.211 
_refine_diff_density_min   -0.343 
_refine_diff_density_rms    0.086 


#============================================================================#
#      Luis Cunha-Silva @ REQUIMTE & DQB FCUP  *  31/01/2020  *   END        #
#============================================================================#
