# Supplementary material for: From Discrete Complexes to Metal–Organic Layered Materials: Remarkable Hydrogen Bonding Frameworks
Source: Molecules. 2020 Mar 16;25(6):1353. doi: 10.3390/molecules25061353 (PMC7146137; doi:10.3390/molecules25061353)
Supplement: Supplementary file 1 [file molecules-25-01353-s001.zip › 5_LCS3812.CIF]

data_general

_publ_contact_author_name         'Dr Lu\'is Cunha Silva'
_publ_contact_author_address
; LAQV/REQUIMTE & Dep. of Chemistry and Biochemistry
  Faculty of Sciences
  University of Porto
  4169-007 Porto
  Portugal
;

_publ_contact_author_email        'l.cunha.silva@fc.up.pt'
_publ_contact_author_fax          '+351 220402576'
_publ_contact_author_phone        '+351 220402659'

_journal_name_full                'Molecules'

loop_
_publ_author_name
_publ_author_footnote
_publ_author_address

'Carla, Queir\\'os'  .
; LAQV/REQUIMTE & Dep. of Chemistry and Biochemistry
  Faculty of Sciences
  University of Porto
  4169-007 Porto
  Portugal
; 

'Silva, Ana M. G.'  .
; LAQV/REQUIMTE & Dep. of Chemistry and Biochemistry
  Faculty of Sciences
  University of Porto
  4169-007 Porto
  Portugal
;

'Castro, Baltazar de'  .
; LAQV/REQUIMTE & Dep. of Chemistry and Biochemistry
  Faculty of Sciences
  University of Porto
  4169-007 Porto
  Portugal
;

'Cunha-Silva, Lu\'is'  .
; LAQV/REQUIMTE & Dep. of Chemistry and Biochemistry
  Faculty of Sciences
  University of Porto
  4169-007 Porto
  Portugal
;


data_lcs3812 
 
# ========================================================================= #
 
_audit_creation_method            'SHELXL-97, manual editing plus enCIFer'
_audit_creation_date              '19 March 2014'

# ========================================================================= #

_chemical_name_systematic 
; 
 ? 
; 
_chemical_name_common             ? 
_chemical_melting_point           ? 
_chemical_formula_moiety          'C40 H40 Ba2 N6 O15, 2(C12 H8 N2), 2(H2 O)' 
_chemical_formula_sum             'C64 H60 Ba2 N10 O17' 
_chemical_formula_weight          1515.90 
 
loop_ 
 _atom_type_symbol 
 _atom_type_description 
 _atom_type_scat_dispersion_real 
 _atom_type_scat_dispersion_imag 
 _atom_type_scat_source 
 'C'  'C'   0.0033   0.0016 
 'International Tables Vol C Tables 4.2.6.8 and 6.1.1.4' 
 'H'  'H'   0.0000   0.0000 
 'International Tables Vol C Tables 4.2.6.8 and 6.1.1.4' 
 'N'  'N'   0.0061   0.0033 
 'International Tables Vol C Tables 4.2.6.8 and 6.1.1.4' 
 'O'  'O'   0.0106   0.0060 
 'International Tables Vol C Tables 4.2.6.8 and 6.1.1.4' 
 'Ba'  'Ba'  -0.3244   2.2819 
 'International Tables Vol C Tables 4.2.6.8 and 6.1.1.4' 
 
_symmetry_cell_setting            Triclinic 
_symmetry_space_group_name_H-M    'P 1' 
_symmetry_space_group_name_Hall   'P 1'
 
loop_ 
 _symmetry_equiv_pos_as_xyz 
 'x, y, z' 
 
_cell_length_a                    10.9458(4) 
_cell_length_b                    11.9419(4) 
_cell_length_c                    13.4085(5) 
_cell_angle_alpha                 64.1780(10) 
_cell_angle_beta                  79.870(2) 
_cell_angle_gamma                 77.1790(10) 
_cell_volume                      1532.06(10) 
_cell_formula_units_Z             1 
_cell_measurement_temperature     150(2) 
_cell_measurement_reflns_used     9886 
_cell_measurement_theta_min       2.44 
_cell_measurement_theta_max       29.95 
 
_exptl_crystal_description        prism 
_exptl_crystal_colour             colourless 
_exptl_crystal_size_max           0.21 
_exptl_crystal_size_mid           0.16 
_exptl_crystal_size_min           0.10 
_exptl_crystal_density_meas       ? 
_exptl_crystal_density_diffrn     1.643 
_exptl_crystal_density_method     'not measured' 
_exptl_crystal_F_000              762 
_exptl_absorpt_coefficient_mu     1.359 
_exptl_absorpt_correction_type    multi-scan 
_exptl_absorpt_correction_T_min   0.7634 
_exptl_absorpt_correction_T_max   0.8761 
_exptl_absorpt_process_details    
;
 SADABS (Sheldrick, 1997)
;     
 
_exptl_special_details 
; 
 ? 
; 
 
_diffrn_ambient_temperature       150(2) 
_diffrn_radiation_wavelength      0.71073 
_diffrn_radiation_type            MoK\a 
_diffrn_radiation_source          'fine-focus sealed tube' 
_diffrn_radiation_monochromator   graphite 
_diffrn_measurement_device_type   'Bruker X8 Kappa CCD APEX II'
_diffrn_measurement_method        'omega/phi scans'
_diffrn_detector_area_resol_mean  ? 
_diffrn_standards_number          ? 
_diffrn_standards_interval_count  ? 
_diffrn_standards_interval_time   ? 
_diffrn_standards_decay_%         ? 
_diffrn_reflns_number             36614 
_diffrn_reflns_av_R_equivalents   0.0330 
_diffrn_reflns_av_sigmaI/netI     0.0454 
_diffrn_reflns_limit_h_min        -14 
_diffrn_reflns_limit_h_max        14 
_diffrn_reflns_limit_k_min        -15 
_diffrn_reflns_limit_k_max        15 
_diffrn_reflns_limit_l_min        -17 
_diffrn_reflns_limit_l_max        17 
_diffrn_reflns_theta_min          3.68 
_diffrn_reflns_theta_max          27.48 
_reflns_number_total              13072 
_reflns_number_gt                 12197 
_reflns_threshold_expression      >2sigma(I) 
 
_computing_data_collection        'APEX2 (Bruker, 2006)' 
_computing_cell_refinement        'APEX2 '
_computing_data_reduction         'SAINT+ (Bruker, 1997-2005)' 
_computing_structure_solution     'SHELXTL (Bruker 2001)' 
_computing_structure_refinement   'SHELXTL '
_computing_molecular_graphics     'SHELXTL ' 
_computing_publication_material   'SHELXTL '  
_refine_special_details 
; 
 Refinement of F^2^ against ALL reflections.  The weighted R-factor wR and 
 goodness of fit S are based on F^2^, conventional R-factors R are based 
 on F, with F set to zero for negative F^2^. The threshold expression of 
 F^2^ > 2sigma(F^2^) is used only for calculating R-factors(gt) etc. and is 
 not relevant to the choice of reflections for refinement.  R-factors based 
 on F^2^ are statistically about twice as large as those based on F, and R- 
 factors based on ALL data will be even larger. 
; 
 
_refine_ls_structure_factor_coef  Fsqd  
_refine_ls_matrix_type            full 
_refine_ls_weighting_scheme       calc  
_refine_ls_weighting_details 
 'calc w=1/[\s^2^(Fo^2^)+(0.0261P)^2^+0.2754P] where P=(Fo^2^+2Fc^2^)/3' 
_atom_sites_solution_primary      direct 
_atom_sites_solution_secondary    difmap 
_atom_sites_solution_hydrogens    geom 
_refine_ls_hydrogen_treatment     mixed 
_refine_ls_extinction_method      none 
_refine_ls_extinction_coef        ? 
_refine_ls_abs_structure_details 
 'Flack H D (1983), Acta Cryst. A39, 876-881' 
_refine_ls_abs_structure_Flack    0.00 
_refine_ls_number_reflns          13072 
_refine_ls_number_parameters      904 
_refine_ls_number_restraints      36 
_refine_ls_R_factor_all           0.0330 
_refine_ls_R_factor_gt            0.0296 
_refine_ls_wR_factor_ref          0.0597 
_refine_ls_wR_factor_gt           0.0580 
_refine_ls_goodness_of_fit_ref    1.041 
_refine_ls_restrained_S_all       1.040 
_refine_ls_shift/su_max           0.002 
_refine_ls_shift/su_mean          0.000 
 
loop_ 
 _atom_site_label 
 _atom_site_type_symbol 
 _atom_site_fract_x 
 _atom_site_fract_y 
 _atom_site_fract_z 
 _atom_site_U_iso_or_equiv 
 _atom_site_adp_type 
 _atom_site_occupancy 
 _atom_site_symmetry_multiplicity 
 _atom_site_calc_flag 
 _atom_site_refinement_flags 
 _atom_site_disorder_assembly 
 _atom_site_disorder_group 
Ba1 Ba 0.456907(14) 0.472059(14) 0.986181(13) 0.01714(7) Uani 1 1 d . . . 
Ba2 Ba 0.081902(12) 0.708559(13) 0.901851(12) 0.01555(6) Uani 1 1 d . . . 
C15 C -0.3033(5) 0.9183(5) 0.6193(4) 0.0153(11) Uani 1 1 d . . . 
H15 H -0.2241 0.9389 0.5812 0.018 Uiso 1 1 calc R . . 
C10 C -0.3117(5) 0.8485(4) 0.7333(4) 0.0156(10) Uani 1 1 d . . . 
N1 N 0.0623(4) 0.0344(5) 1.5938(3) 0.0662(16) Uani 1 1 d D . . 
H1A H 0.136(3) 0.017(7) 1.616(5) 0.099 Uiso 1 1 d D . . 
H2A H 0.005(4) -0.003(6) 1.642(4) 0.099 Uiso 1 1 d D . . 
N2 N -0.3996(5) 1.0239(4) 0.4479(4) 0.0268(11) Uani 1 1 d D . . 
H3A H -0.471(2) 1.052(4) 0.418(3) 0.040 Uiso 1 1 d D . . 
H4A H -0.343(3) 1.071(3) 0.413(3) 0.040 Uiso 1 1 d D . . 
N3 N 0.5396(5) 0.2482(5) 0.9376(4) 0.0262(12) Uani 1 1 d . . . 
N4 N 0.5768(4) 0.4810(4) 0.7714(4) 0.0226(10) Uani 1 1 d . . . 
N5 N -0.0572(4) 0.7197(4) 1.0994(4) 0.0186(9) Uani 1 1 d . . . 
C34 C -0.0747(6) 0.9446(6) 1.0290(5) 0.0219(13) Uani 1 1 d . . . 
C23 C 0.7132(5) 0.3790(5) 0.6601(5) 0.0200(12) Uani 1 1 d . . . 
C13 C -0.5242(5) 0.9272(5) 0.6190(4) 0.0183(11) Uani 1 1 d . . . 
H13 H -0.5981 0.9541 0.5811 0.022 Uiso 1 1 calc R . . 
C33 C -0.1070(5) 0.8269(5) 1.1145(5) 0.0187(12) Uani 1 1 d . . . 
C32 C -0.1851(6) 0.8266(6) 1.2098(5) 0.0275(13) Uani 1 1 d . . . 
C22 C 0.6324(5) 0.3738(5) 0.7577(5) 0.0203(12) Uani 1 1 d . . . 
C20 C 0.6664(6) 0.1412(6) 0.8278(6) 0.0277(15) Uani 1 1 d . . . 
C19 C 0.6427(6) 0.0272(5) 0.9115(5) 0.0285(14) Uani 1 1 d . . . 
H19 H 0.6799 -0.0487 0.9037 0.034 Uiso 1 1 calc R . . 
C25 C 0.7475(6) 0.1514(6) 0.7282(6) 0.0328(16) Uani 1 1 d . . . 
H25 H 0.7867 0.0770 0.7184 0.039 Uiso 1 1 calc R . . 
C24 C 0.7687(6) 0.2643(6) 0.6488(6) 0.0286(14) Uani 1 1 d . . . 
H24 H 0.8218 0.2681 0.5836 0.034 Uiso 1 1 calc R . . 
C27 C 0.6723(5) 0.6023(5) 0.5946(5) 0.0277(12) Uani 1 1 d . . . 
H27 H 0.6827 0.6840 0.5395 0.033 Uiso 1 1 calc R . . 
C26 C 0.7315(5) 0.4986(5) 0.5777(5) 0.0279(13) Uani 1 1 d . . . 
H26 H 0.7844 0.5067 0.5114 0.034 Uiso 1 1 calc R . . 
C37 C -0.2333(6) 0.9422(7) 1.2220(6) 0.0346(17) Uani 1 1 d . . . 
H37 H -0.2862 0.9416 1.2864 0.042 Uiso 1 1 calc R . . 
C17 C 0.5191(6) 0.1384(6) 1.0138(6) 0.0329(16) Uani 1 1 d . . . 
H17 H 0.4689 0.1360 1.0799 0.039 Uiso 1 1 calc R . . 
C31 C -0.2132(5) 0.7088(6) 1.2892(5) 0.0315(14) Uani 1 1 d . . . 
H31 H -0.2663 0.7046 1.3545 0.038 Uiso 1 1 calc R . . 
C18 C 0.5667(7) 0.0219(6) 1.0051(6) 0.0354(16) Uani 1 1 d . . . 
H18 H 0.5465 -0.0557 1.0617 0.042 Uiso 1 1 calc R . . 
C29 C -0.0870(5) 0.6124(5) 1.1765(4) 0.0280(12) Uani 1 1 d . . . 
H29 H -0.0530 0.5379 1.1654 0.034 Uiso 1 1 calc R . . 
C30 C -0.1662(5) 0.6005(6) 1.2749(5) 0.0328(13) Uani 1 1 d . . . 
H30 H -0.1857 0.5211 1.3283 0.039 Uiso 1 1 calc R . . 
C28 C 0.5975(5) 0.5894(5) 0.6909(4) 0.0272(12) Uani 1 1 d . . . 
H28 H 0.5579 0.6640 0.7000 0.033 Uiso 1 1 calc R . . 
C11 C -0.4238(3) 0.8170(3) 0.7924(3) 0.0181(7) Uani 1 1 d . . . 
H11 H -0.4286 0.7703 0.8709 0.022 Uiso 1 1 calc R . . 
O1 O 0.3104(4) 0.2935(4) 1.1361(3) 0.0252(9) Uani 1 1 d . . . 
O1W O 0.5565(3) 0.3190(3) 1.1844(3) 0.0485(9) Uani 1 1 d D . . 
H2W H 0.624(4) 0.309(5) 1.143(5) 0.073 Uiso 1 1 d D . . 
H1W H 0.524(4) 0.251(3) 1.229(4) 0.073 Uiso 1 1 d D . . 
O2W O 0.7056(3) 0.4998(3) 0.9728(3) 0.0257(8) Uani 1 1 d D . . 
H3W H 0.729(5) 0.437(3) 1.031(3) 0.039 Uiso 1 1 d D . . 
H4W H 0.732(4) 0.570(2) 0.956(4) 0.039 Uiso 1 1 d D . . 
O3W O 0.4531(3) 0.5730(4) 1.1409(3) 0.0410(9) Uani 1 1 d D . . 
H5W H 0.388(3) 0.619(4) 1.160(4) 0.062 Uiso 1 1 d D . . 
H6W H 0.468(6) 0.494(3) 1.193(4) 0.062 Uiso 1 1 d D . . 
O4W O 0.2564(2) 0.4877(2) 0.8802(2) 0.0232(5) Uani 1 1 d D . . 
H7W H 0.198(3) 0.445(4) 0.928(3) 0.035 Uiso 1 1 d D . . 
H8W H 0.277(4) 0.470(4) 0.822(2) 0.035 Uiso 1 1 d D . . 
O5W O 0.1989(2) 0.5301(2) 1.0936(2) 0.0220(5) Uani 1 1 d D . . 
H9W H 0.209(4) 0.547(3) 1.151(2) 0.033 Uiso 1 1 d D . . 
H10W H 0.213(4) 0.4484(18) 1.113(3) 0.033 Uiso 1 1 d D . . 
O6W O 0.0181(2) 0.4526(3) 0.9779(2) 0.0280(6) Uani 1 1 d D . . 
H11W H -0.017(4) 0.456(4) 0.922(2) 0.042 Uiso 1 1 d D . . 
H12W H -0.027(4) 0.409(4) 1.043(2) 0.042 Uiso 1 1 d D . . 
O7W O 0.0798(4) 0.6723(3) 0.7029(3) 0.0362(8) Uani 1 1 d D . . 
H13W H 0.137(4) 0.660(4) 0.649(3) 0.054 Uiso 1 1 d D . . 
H14W H 0.068(5) 0.594(3) 0.755(4) 0.054 Uiso 1 1 d D . . 
O8W O -0.0800(5) 0.4875(4) 0.7846(4) 0.0485(12) Uani 1 1 d D . . 
H15W H -0.034(4) 0.550(4) 0.742(4) 0.073 Uiso 1 1 d D . . 
H16W H -0.161(2) 0.524(4) 0.782(5) 0.073 Uiso 1 1 d D . . 
O9W O 0.6240(6) -0.2715(5) 1.0888(5) 0.0635(15) Uani 1 1 d D . . 
H17W H 0.559(4) -0.310(6) 1.089(5) 0.095 Uiso 1 1 d D . . 
H18W H 0.686(4) -0.285(6) 1.036(5) 0.095 Uiso 1 1 d D . . 
O2 O 0.4096(3) 0.1368(3) 1.2805(2) 0.0276(6) Uani 1 1 d . . . 
O5 O -0.0970(3) 0.8598(3) 0.7442(3) 0.0314(7) Uani 1 1 d . . . 
C2 C 0.1867(3) 0.1864(3) 1.3024(3) 0.0181(7) Uani 1 1 d . . . 
C1 C 0.3126(3) 0.2048(3) 1.2353(3) 0.0191(7) Uani 1 1 d . . . 
C9 C -0.1913(3) 0.8066(3) 0.7950(3) 0.0194(7) Uani 1 1 d . . . 
C16 C -0.6543(3) 0.8135(3) 0.7939(3) 0.0170(7) Uani 1 1 d . . . 
C3 C 0.1815(3) 0.1154(3) 1.4159(3) 0.0244(8) Uani 1 1 d . . . 
H3 H 0.2575 0.0774 1.4508 0.029 Uiso 1 1 calc R . . 
N8 N 0.3073(5) 0.6577(5) 0.5641(4) 0.0284(11) Uani 1 1 d . . . 
N9 N 0.1997(5) 0.5330(5) 1.3137(5) 0.0398(14) Uani 1 1 d . . . 
N7 N 0.2993(4) 0.4075(4) 0.7048(4) 0.0267(11) Uani 1 1 d . . . 
N10 N 0.2476(5) 0.7604(5) 1.1551(5) 0.0374(13) Uani 1 1 d . . . 
C5 C -0.0478(6) 0.1534(5) 1.4270(5) 0.0263(13) Uani 1 1 d . . . 
H5 H -0.1271 0.1414 1.4689 0.032 Uiso 1 1 calc R . . 
C46 C 0.3747(5) 0.5691(6) 0.5316(5) 0.0286(13) Uani 1 1 d . . . 
C57 C 0.1449(5) 0.6389(6) 1.3310(5) 0.0280(14) Uani 1 1 d . . . 
C49 C 0.5150(6) 0.3806(7) 0.4647(6) 0.0448(17) Uani 1 1 d . . . 
H49 H 0.5621 0.3176 0.4416 0.054 Uiso 1 1 calc R . . 
C45 C 0.3694(5) 0.4380(6) 0.6056(5) 0.0270(13) Uani 1 1 d . . . 
C58 C 0.1689(6) 0.7603(6) 1.2448(6) 0.0369(18) Uani 1 1 d . . . 
C53 C 0.1791(6) 0.4262(6) 1.3950(5) 0.0525(19) Uani 1 1 d . . . 
H53 H 0.2154 0.3508 1.3860 0.063 Uiso 1 1 calc R . . 
C47 C 0.4503(5) 0.5998(6) 0.4298(5) 0.0342(13) Uani 1 1 d . . . 
C55 C 0.0526(6) 0.5187(9) 1.5112(6) 0.068(3) Uani 1 1 d . . . 
H55 H 0.0035 0.5131 1.5786 0.082 Uiso 1 1 calc R . . 
C4 C 0.0661(4) 0.0982(4) 1.4807(3) 0.0292(9) Uani 1 1 d . . . 
C44 C 0.4383(5) 0.3424(5) 0.5704(5) 0.0328(12) Uani 1 1 d . . . 
C60 C 0.0329(7) 0.8642(8) 1.3544(8) 0.081(3) Uani 1 1 d . . . 
H60 H -0.0070 0.9396 1.3621 0.097 Uiso 1 1 calc R . . 
O8 O -0.7565(3) 0.8758(4) 0.7466(3) 0.0273(9) Uani 1 1 d . . . 
O6 O -0.1901(3) 0.7182(3) 0.8911(3) 0.0306(9) Uani 1 1 d . . . 
C42 C 0.3543(7) 0.1898(7) 0.7367(7) 0.054(2) Uani 1 1 d . . . 
H42 H 0.3450 0.1050 0.7841 0.065 Uiso 1 1 calc R . . 
O7 O -0.6513(2) 0.7185(2) 0.8863(2) 0.0229(5) Uani 1 1 d . . . 
C21 C 0.6124(5) 0.2523(6) 0.8438(5) 0.0212(13) Uani 1 1 d . . . 
C51 C 0.3863(5) 0.8174(5) 0.3982(5) 0.0464(14) Uani 1 1 d . . . 
H51 H 0.3910 0.9043 0.3553 0.056 Uiso 1 1 calc R . . 
C50 C 0.4511(6) 0.7294(7) 0.3632(5) 0.054(2) Uani 1 1 d . . . 
H50 H 0.4982 0.7548 0.2926 0.065 Uiso 1 1 calc R . . 
C48 C 0.5213(5) 0.5012(6) 0.3993(4) 0.0427(14) Uani 1 1 d . . . 
H48 H 0.5737 0.5223 0.3314 0.051 Uiso 1 1 calc R . . 
C41 C 0.2930(5) 0.2872(5) 0.7649(4) 0.0389(12) Uani 1 1 d . . . 
H41 H 0.2417 0.2658 0.8334 0.047 Uiso 1 1 calc R . . 
C43 C 0.4290(4) 0.2182(5) 0.6389(5) 0.0452(13) Uani 1 1 d . . . 
H43 H 0.4743 0.1528 0.6181 0.054 Uiso 1 1 calc R . . 
O3 O -0.1533(3) 0.3517(3) 1.1511(3) 0.0282(9) Uani 1 1 d . . . 
N6 N 0.0014(5) 0.9423(5) 0.9379(4) 0.0223(11) Uani 1 1 d . . . 
C7 C 0.0736(5) 0.2443(5) 1.2491(4) 0.0168(10) Uani 1 1 d . . . 
H7A H 0.0769 0.2952 1.1713 0.020 Uiso 1 1 calc R . . 
C8 C -0.1614(5) 0.2812(5) 1.2526(5) 0.0195(12) Uani 1 1 d . . . 
C6 C -0.0408(5) 0.2262(5) 1.3108(4) 0.0163(11) Uani 1 1 d . . . 
C40 C 0.0283(6) 1.0529(5) 0.8602(6) 0.0278(13) Uani 1 1 d . . . 
H40 H 0.0818 1.0534 0.7961 0.033 Uiso 1 1 calc R . . 
C38 C -0.0920(6) 1.1707(6) 0.9587(6) 0.0319(15) Uani 1 1 d . . . 
H38 H -0.1220 1.2483 0.9653 0.038 Uiso 1 1 calc R . . 
C56 C 0.0684(6) 0.6347(7) 1.4289(5) 0.0486(17) Uani 1 1 d . . . 
C35 C -0.1251(6) 1.0562(6) 1.0441(5) 0.0250(14) Uani 1 1 d . . . 
C39 C -0.0175(6) 1.1677(6) 0.8678(6) 0.0325(15) Uani 1 1 d . . . 
H39 H 0.0036 1.2437 0.8093 0.039 Uiso 1 1 calc R . . 
C62 C 0.2737(5) 0.8713(5) 1.0758(5) 0.0529(15) Uani 1 1 d . . . 
H62 H 0.3294 0.8713 1.0128 0.063 Uiso 1 1 calc R . . 
C54 C 0.1040(7) 0.4153(9) 1.4983(6) 0.066(2) Uani 1 1 d . . . 
H54 H 0.0925 0.3349 1.5554 0.079 Uiso 1 1 calc R . . 
C59 C 0.1120(5) 0.8731(6) 1.2570(6) 0.0534(19) Uani 1 1 d . . . 
C61 C 0.0123(7) 0.7556(9) 1.4349(7) 0.066(3) Uani 1 1 d . . . 
H61 H -0.0408 0.7551 1.4992 0.079 Uiso 1 1 calc R . . 
C63 C 0.2236(7) 0.9849(6) 1.0814(7) 0.070(2) Uani 1 1 d . . . 
H63 H 0.2443 1.0613 1.0231 0.084 Uiso 1 1 calc R . . 
O4 O -0.2599(2) 0.2525(3) 1.3131(2) 0.0283(6) Uani 1 1 d . . . 
C52 C 0.3143(5) 0.7789(5) 0.4961(6) 0.0392(15) Uani 1 1 d . . . 
H52 H 0.2653 0.8418 0.5184 0.047 Uiso 1 1 calc R . . 
C64 C 0.1453(8) 0.9870(7) 1.1698(8) 0.064(3) Uani 1 1 d . . . 
H64 H 0.1117 1.0653 1.1744 0.076 Uiso 1 1 calc R . . 
C12 C -0.5308(3) 0.8552(3) 0.7349(3) 0.0167(7) Uani 1 1 d . . . 
C14 C -0.4088(5) 0.9594(5) 0.5589(4) 0.0172(11) Uani 1 1 d . . . 
C36 C -0.2040(6) 1.0499(6) 1.1432(6) 0.0334(15) Uani 1 1 d . . . 
H36 H -0.2364 1.1256 1.1526 0.040 Uiso 1 1 calc R . . 
 
loop_ 
 _atom_site_aniso_label 
 _atom_site_aniso_U_11 
 _atom_site_aniso_U_22 
 _atom_site_aniso_U_33 
 _atom_site_aniso_U_23 
 _atom_site_aniso_U_13 
 _atom_site_aniso_U_12 
Ba1 0.01389(14) 0.02097(14) 0.01594(15) -0.00815(12) 0.00076(11) -0.00220(11) 
Ba2 0.01274(13) 0.01805(13) 0.01600(15) -0.00800(12) 0.00119(11) -0.00268(10) 
C15 0.015(2) 0.016(2) 0.011(2) -0.0018(18) 0.0018(17) -0.0032(17) 
C10 0.012(2) 0.0116(18) 0.021(3) -0.0055(18) -0.0018(19) 0.0001(15) 
N1 0.025(2) 0.109(4) 0.021(2) 0.014(2) -0.0017(18) -0.013(3) 
N2 0.026(2) 0.031(3) 0.019(2) -0.001(2) -0.0066(19) -0.0138(19) 
N3 0.027(3) 0.030(3) 0.025(3) -0.015(2) 0.001(2) -0.005(2) 
N4 0.027(2) 0.023(2) 0.019(2) -0.0116(17) -0.0035(17) -0.0003(16) 
N5 0.0187(19) 0.0198(19) 0.016(2) -0.0069(16) 0.0023(15) -0.0037(14) 
C34 0.023(3) 0.024(2) 0.024(3) -0.013(2) -0.005(2) -0.006(2) 
C23 0.018(2) 0.026(2) 0.020(3) -0.015(2) 0.0008(19) 0.0004(18) 
C13 0.025(2) 0.014(2) 0.016(2) -0.0042(18) -0.0090(19) -0.0034(17) 
C33 0.014(2) 0.028(3) 0.019(2) -0.016(2) -0.0035(18) 0.0027(18) 
C32 0.022(3) 0.039(3) 0.023(3) -0.013(2) 0.000(2) -0.008(2) 
C22 0.012(2) 0.025(2) 0.025(3) -0.011(2) -0.0045(19) -0.0016(18) 
C20 0.024(3) 0.031(3) 0.030(3) -0.012(2) -0.007(2) -0.006(2) 
C19 0.028(3) 0.026(3) 0.033(3) -0.016(3) 0.000(2) 0.000(2) 
C25 0.030(3) 0.040(3) 0.031(3) -0.026(3) 0.007(2) 0.003(2) 
C24 0.026(3) 0.029(3) 0.031(3) -0.017(2) 0.005(2) -0.004(2) 
C27 0.034(3) 0.029(2) 0.021(2) -0.011(2) 0.000(2) -0.008(2) 
C26 0.030(3) 0.033(3) 0.019(3) -0.008(2) 0.002(2) -0.011(2) 
C37 0.035(3) 0.049(4) 0.023(3) -0.026(3) 0.004(2) 0.005(3) 
C17 0.033(3) 0.039(4) 0.022(3) -0.014(3) 0.007(2) -0.004(3) 
C31 0.028(3) 0.049(3) 0.017(3) -0.017(3) 0.003(2) 0.000(2) 
C18 0.045(4) 0.030(3) 0.029(3) -0.012(3) 0.003(3) -0.008(3) 
C29 0.031(3) 0.035(3) 0.021(3) -0.016(2) 0.002(2) -0.005(2) 
C30 0.030(3) 0.042(3) 0.027(3) -0.014(2) 0.007(2) -0.016(2) 
C28 0.039(3) 0.020(2) 0.023(3) -0.0101(19) -0.006(2) -0.0018(19) 
C11 0.0225(17) 0.0143(16) 0.0167(18) -0.0047(14) -0.0050(15) -0.0025(14) 
O1 0.0245(18) 0.0301(19) 0.0140(18) -0.0040(15) 0.0015(14) -0.0045(14) 
O1W 0.0351(18) 0.0482(19) 0.041(2) 0.0137(16) -0.0214(16) -0.0212(16) 
O2W 0.0191(16) 0.0317(18) 0.0223(18) -0.0027(15) -0.0079(13) -0.0093(14) 
O3W 0.0300(18) 0.060(2) 0.044(2) -0.035(2) -0.0049(17) 0.0016(18) 
O4W 0.0200(13) 0.0302(14) 0.0214(14) -0.0132(12) 0.0015(11) -0.0051(10) 
O5W 0.0249(13) 0.0219(12) 0.0185(14) -0.0092(11) -0.0020(11) -0.0007(11) 
O6W 0.0251(14) 0.0350(15) 0.0200(14) -0.0057(13) -0.0004(11) -0.0105(11) 
O7W 0.0364(18) 0.048(2) 0.025(2) -0.0209(16) -0.0049(15) 0.0051(17) 
O8W 0.045(2) 0.068(3) 0.041(3) -0.034(2) -0.015(2) 0.008(2) 
O9W 0.074(3) 0.056(3) 0.061(3) -0.026(2) -0.002(3) -0.011(2) 
O2 0.0195(14) 0.0293(15) 0.0241(15) -0.0032(12) -0.0011(12) -0.0018(12) 
O5 0.0181(14) 0.0240(14) 0.0426(18) -0.0022(13) -0.0118(13) -0.0027(12) 
C2 0.0156(16) 0.0180(16) 0.0193(19) -0.0068(15) 0.0016(14) -0.0042(13) 
C1 0.0178(17) 0.0188(16) 0.022(2) -0.0097(15) -0.0012(15) -0.0032(14) 
C9 0.0177(17) 0.0121(15) 0.024(2) -0.0043(15) -0.0022(15) -0.0014(13) 
C16 0.0193(17) 0.0170(16) 0.0182(19) -0.0096(15) -0.0009(14) -0.0051(13) 
C3 0.0174(17) 0.0277(18) 0.020(2) -0.0025(16) -0.0045(15) -0.0020(14) 
N8 0.034(2) 0.027(2) 0.031(2) -0.0165(19) -0.0060(18) -0.0068(17) 
N9 0.054(3) 0.042(3) 0.033(3) -0.019(2) 0.000(2) -0.021(2) 
N7 0.026(2) 0.027(2) 0.031(3) -0.0141(19) -0.0029(19) -0.0063(16) 
N10 0.030(2) 0.037(2) 0.050(3) -0.023(2) -0.005(2) -0.0061(18) 
C5 0.020(3) 0.028(3) 0.026(3) -0.008(2) 0.001(2) -0.004(2) 
C46 0.022(3) 0.044(3) 0.026(3) -0.018(2) -0.006(2) -0.009(2) 
C57 0.021(2) 0.047(3) 0.032(3) -0.032(3) -0.002(2) -0.004(2) 
C49 0.029(3) 0.071(4) 0.060(4) -0.056(4) -0.002(3) 0.002(3) 
C45 0.015(2) 0.042(3) 0.033(3) -0.024(3) -0.005(2) -0.002(2) 
C58 0.031(3) 0.035(3) 0.066(5) -0.037(3) -0.023(3) 0.005(2) 
C53 0.076(5) 0.049(4) 0.039(4) -0.020(3) -0.012(3) -0.015(3) 
C47 0.024(3) 0.058(4) 0.022(3) -0.016(3) -0.001(2) -0.013(2) 
C55 0.031(3) 0.156(9) 0.043(4) -0.064(6) 0.004(3) -0.021(4) 
C4 0.025(2) 0.038(2) 0.017(2) -0.0036(17) 0.0019(16) -0.0082(17) 
C44 0.023(2) 0.043(3) 0.050(3) -0.035(3) -0.006(2) -0.002(2) 
C60 0.058(4) 0.108(6) 0.122(7) -0.098(6) -0.063(5) 0.049(5) 
O8 0.0163(17) 0.035(2) 0.022(2) -0.0020(16) 0.0002(14) -0.0107(15) 
O6 0.0208(17) 0.038(2) 0.024(2) -0.0013(16) -0.0092(15) -0.0079(15) 
C42 0.055(4) 0.029(3) 0.079(5) -0.020(3) -0.006(4) -0.014(3) 
O7 0.0206(13) 0.0236(13) 0.0184(14) -0.0009(11) -0.0029(11) -0.0076(10) 
C21 0.013(3) 0.030(3) 0.023(3) -0.016(2) -0.001(2) 0.002(2) 
C51 0.038(3) 0.041(3) 0.045(3) 0.002(3) -0.010(2) -0.015(2) 
C50 0.040(4) 0.079(5) 0.026(3) 0.004(3) -0.010(3) -0.025(3) 
C48 0.028(2) 0.085(4) 0.028(3) -0.036(3) -0.002(2) -0.006(3) 
C41 0.042(3) 0.039(3) 0.040(3) -0.019(3) 0.003(2) -0.014(2) 
C43 0.036(3) 0.040(3) 0.075(4) -0.040(3) -0.002(3) -0.004(2) 
O3 0.0207(19) 0.0334(19) 0.0161(19) 0.0037(15) -0.0033(15) -0.0043(14) 
N6 0.023(2) 0.022(2) 0.021(2) -0.009(2) 0.0019(19) -0.0054(19) 
C7 0.019(2) 0.019(2) 0.012(2) -0.0043(18) -0.0006(17) -0.0076(17) 
C8 0.015(2) 0.020(2) 0.026(3) -0.011(2) -0.005(2) -0.0013(18) 
C6 0.021(2) 0.018(2) 0.010(2) -0.0064(18) -0.0013(18) -0.0034(18) 
C40 0.034(3) 0.026(3) 0.025(3) -0.008(2) 0.000(2) -0.013(2) 
C38 0.041(3) 0.020(2) 0.040(3) -0.015(2) -0.016(3) -0.001(2) 
C56 0.028(3) 0.098(5) 0.037(4) -0.043(4) -0.007(2) -0.007(3) 
C35 0.021(3) 0.032(3) 0.031(3) -0.024(3) -0.010(2) 0.007(2) 
C39 0.038(3) 0.027(3) 0.033(3) -0.009(3) -0.010(3) -0.008(2) 
C62 0.050(3) 0.046(3) 0.066(4) -0.018(3) -0.015(3) -0.018(3) 
C54 0.071(5) 0.103(7) 0.033(4) -0.019(4) -0.001(4) -0.052(5) 
C59 0.043(3) 0.067(4) 0.082(5) -0.064(4) -0.038(4) 0.024(3) 
C61 0.036(3) 0.132(8) 0.061(5) -0.082(6) -0.022(4) 0.029(5) 
C63 0.081(5) 0.039(3) 0.094(6) -0.019(4) -0.047(4) -0.006(3) 
O4 0.0160(13) 0.0406(15) 0.0206(14) -0.0046(12) -0.0001(11) -0.0085(11) 
C52 0.038(3) 0.026(2) 0.054(4) -0.012(2) -0.017(3) -0.007(2) 
C64 0.073(5) 0.034(4) 0.106(7) -0.043(4) -0.060(5) 0.019(3) 
C12 0.0162(16) 0.0151(15) 0.0195(19) -0.0087(15) 0.0006(14) -0.0025(13) 
C14 0.017(2) 0.015(2) 0.016(3) -0.0032(19) 0.0013(18) -0.0052(17) 
C36 0.030(3) 0.036(3) 0.044(4) -0.027(3) -0.009(3) 0.003(2) 
 
_geom_special_details 
; 
 All esds (except the esd in the dihedral angle between two l.s. planes) 
 are estimated using the full covariance matrix.  The cell esds are taken 
 into account individually in the estimation of esds in distances, angles 
 and torsion angles; correlations between esds in cell parameters are only 
 used when they are defined by crystal symmetry.  An approximate (isotropic) 
 treatment of cell esds is used for estimating esds involving l.s. planes. 
; 
 
loop_ 
 _geom_bond_atom_site_label_1 
 _geom_bond_atom_site_label_2 
 _geom_bond_distance 
 _geom_bond_site_symmetry_2 
 _geom_bond_publ_flag 
Ba1 O7 2.726(2) 1_655 ? 
Ba1 O1W 2.738(3) . ? 
Ba1 O4W 2.748(2) . ? 
Ba1 O2W 2.780(3) . ? 
Ba1 O1 2.794(4) . ? 
Ba1 O3W 2.807(4) . ? 
Ba1 N4 2.915(5) . ? 
Ba1 N3 2.937(5) . ? 
Ba1 O5W 3.017(2) . ? 
Ba1 H2W 2.79(7) . ? 
Ba1 H6W 2.93(7) . ? 
Ba1 H10W 2.90(4) . ? 
Ba2 O5W 2.823(2) . ? 
Ba2 O8 2.846(4) 1_655 ? 
Ba2 O5 2.851(3) . ? 
Ba2 N5 2.855(4) . ? 
Ba2 O7W 2.887(4) . ? 
Ba2 O7 2.916(2) 1_655 ? 
Ba2 N6 2.956(5) . ? 
Ba2 O6W 2.975(3) . ? 
Ba2 O6 2.981(4) . ? 
Ba2 O4W 2.987(2) . ? 
Ba2 C16 3.249(3) 1_655 ? 
Ba2 H14W 2.89(6) . ? 
C15 C10 1.383(8) . ? 
C15 C14 1.401(8) . ? 
C15 H15 0.9500 . ? 
C10 C11 1.371(6) . ? 
C10 C9 1.549(6) . ? 
N1 C4 1.366(5) . ? 
N1 H1A 0.862(19) . ? 
N1 H2A 0.857(19) . ? 
N2 C14 1.343(7) . ? 
N2 H3A 0.876(18) . ? 
N2 H4A 0.858(18) . ? 
N3 C17 1.303(8) . ? 
N3 C21 1.353(7) . ? 
N4 C28 1.311(7) . ? 
N4 C22 1.365(7) . ? 
N5 C29 1.314(7) . ? 
N5 C33 1.362(7) . ? 
C34 N6 1.359(7) . ? 
C34 C35 1.412(8) . ? 
C34 C33 1.445(9) . ? 
C23 C26 1.406(8) . ? 
C23 C24 1.430(8) . ? 
C23 C22 1.431(8) . ? 
C13 C12 1.409(6) . ? 
C13 C14 1.407(7) . ? 
C13 H13 0.9500 . ? 
C33 C32 1.406(8) . ? 
C32 C31 1.406(9) . ? 
C32 C37 1.433(9) . ? 
C22 C21 1.442(9) . ? 
C20 C19 1.379(9) . ? 
C20 C21 1.418(9) . ? 
C20 C25 1.441(9) . ? 
C19 C18 1.364(9) . ? 
C19 H19 0.9500 . ? 
C25 C24 1.344(9) . ? 
C25 H25 0.9500 . ? 
C24 H24 0.9500 . ? 
C27 C26 1.357(8) . ? 
C27 C28 1.368(8) . ? 
C27 H27 0.9500 . ? 
C26 H26 0.9500 . ? 
C37 C36 1.324(10) . ? 
C37 H37 0.9500 . ? 
C17 C18 1.421(9) . ? 
C17 H17 0.9500 . ? 
C31 C30 1.363(8) . ? 
C31 H31 0.9500 . ? 
C18 H18 0.9500 . ? 
C29 C30 1.415(8) . ? 
C29 H29 0.9500 . ? 
C30 H30 0.9500 . ? 
C28 H28 0.9500 . ? 
C11 C12 1.396(5) . ? 
C11 H11 0.9500 . ? 
O1 C1 1.291(5) . ? 
O1W H2W 0.865(19) . ? 
O1W H1W 0.877(19) . ? 
O2W H3W 0.849(18) . ? 
O2W H4W 0.871(18) . ? 
O3W H5W 0.869(19) . ? 
O3W H6W 0.901(19) . ? 
O4W H7W 0.893(18) . ? 
O4W H8W 0.874(18) . ? 
O5W H9W 0.903(18) . ? 
O5W H10W 0.877(18) . ? 
O6W H11W 0.882(18) . ? 
O6W H12W 0.920(18) . ? 
O7W H13W 0.907(19) . ? 
O7W H14W 0.912(19) . ? 
O8W H15W 0.916(19) . ? 
O8W H16W 0.898(19) . ? 
O9W H17W 0.933(19) . ? 
O9W H18W 0.933(19) . ? 
O2 C1 1.252(4) . ? 
O5 C9 1.265(5) . ? 
C2 C3 1.381(5) . ? 
C2 C7 1.422(6) . ? 
C2 C1 1.511(5) . ? 
C9 O6 1.261(5) . ? 
C16 O7 1.264(4) . ? 
C16 O8 1.295(5) . ? 
C16 C12 1.510(5) . ? 
C16 Ba2 3.249(3) 1_455 ? 
C3 C4 1.402(5) . ? 
C3 H3 0.9500 . ? 
N8 C46 1.340(8) . ? 
N8 C52 1.344(7) . ? 
N9 C53 1.302(8) . ? 
N9 C57 1.372(8) . ? 
N7 C41 1.317(7) . ? 
N7 C45 1.354(7) . ? 
N10 C58 1.350(8) . ? 
N10 C62 1.342(8) . ? 
C5 C6 1.414(8) . ? 
C5 C4 1.430(7) . ? 
C5 H5 0.9500 . ? 
C46 C47 1.409(8) . ? 
C46 C45 1.451(9) . ? 
C57 C56 1.415(8) . ? 
C57 C58 1.453(9) . ? 
C49 C48 1.331(9) . ? 
C49 C44 1.453(9) . ? 
C49 H49 0.9500 . ? 
C45 C44 1.434(8) . ? 
C58 C59 1.419(8) . ? 
C53 C54 1.449(9) . ? 
C53 H53 0.9500 . ? 
C47 C50 1.411(9) . ? 
C47 C48 1.435(8) . ? 
C55 C54 1.309(11) . ? 
C55 C56 1.369(10) . ? 
C55 H55 0.9500 . ? 
C44 C43 1.379(8) . ? 
C60 C61 1.312(12) . ? 
C60 C59 1.410(10) . ? 
C60 H60 0.9500 . ? 
O8 Ba2 2.846(4) 1_455 ? 
C42 C43 1.364(9) . ? 
C42 C41 1.376(8) . ? 
C42 H42 0.9500 . ? 
O7 Ba1 2.726(2) 1_455 ? 
O7 Ba2 2.916(2) 1_455 ? 
C51 C50 1.346(10) . ? 
C51 C52 1.351(9) . ? 
C51 H51 0.9500 . ? 
C50 H50 0.9500 . ? 
C48 H48 0.9500 . ? 
C41 H41 0.9500 . ? 
C43 H43 0.9500 . ? 
O3 C8 1.249(7) . ? 
N6 C40 1.335(8) . ? 
C7 C6 1.378(7) . ? 
C7 H7A 0.9500 . ? 
C8 O4 1.246(6) . ? 
C8 C6 1.521(8) . ? 
C40 C39 1.392(8) . ? 
C40 H40 0.9500 . ? 
C38 C39 1.351(9) . ? 
C38 C35 1.422(9) . ? 
C38 H38 0.9500 . ? 
C56 C61 1.469(10) . ? 
C35 C36 1.432(9) . ? 
C39 H39 0.9500 . ? 
C62 C63 1.375(8) . ? 
C62 H62 0.9500 . ? 
C54 H54 0.9500 . ? 
C59 C64 1.427(11) . ? 
C61 H61 0.9500 . ? 
C63 C64 1.342(11) . ? 
C63 H63 0.9500 . ? 
C52 H52 0.9500 . ? 
C64 H64 0.9500 . ? 
C36 H36 0.9500 . ? 
 
loop_ 
 _geom_angle_atom_site_label_1 
 _geom_angle_atom_site_label_2 
 _geom_angle_atom_site_label_3 
 _geom_angle 
 _geom_angle_site_symmetry_1 
 _geom_angle_site_symmetry_3 
 _geom_angle_publ_flag 
O7 Ba1 O1W 136.06(10) 1_655 . ? 
O7 Ba1 O4W 70.90(7) 1_655 . ? 
O1W Ba1 O4W 137.25(9) . . ? 
O7 Ba1 O2W 100.22(9) 1_655 . ? 
O1W Ba1 O2W 69.83(10) . . ? 
O4W Ba1 O2W 148.80(9) . . ? 
O7 Ba1 O1 119.69(10) 1_655 . ? 
O1W Ba1 O1 65.33(10) . . ? 
O4W Ba1 O1 72.22(10) . . ? 
O2W Ba1 O1 133.73(10) . . ? 
O7 Ba1 O3W 74.78(10) 1_655 . ? 
O1W Ba1 O3W 61.29(12) . . ? 
O4W Ba1 O3W 126.46(9) . . ? 
O2W Ba1 O3W 76.40(11) . . ? 
O1 Ba1 O3W 91.56(11) . . ? 
O7 Ba1 N4 90.13(10) 1_655 . ? 
O1W Ba1 N4 123.86(12) . . ? 
O4W Ba1 N4 77.62(10) . . ? 
O2W Ba1 N4 72.45(12) . . ? 
O1 Ba1 N4 125.56(12) . . ? 
O3W Ba1 N4 142.21(12) . . ? 
O7 Ba1 N3 139.92(11) 1_655 . ? 
O1W Ba1 N3 83.92(13) . . ? 
O4W Ba1 N3 79.97(11) . . ? 
O2W Ba1 N3 90.54(13) . . ? 
O1 Ba1 N3 74.23(13) . . ? 
O3W Ba1 N3 145.15(13) . . ? 
N4 Ba1 N3 56.41(14) . . ? 
O7 Ba1 O5W 66.83(7) 1_655 . ? 
O1W Ba1 O5W 94.12(9) . . ? 
O4W Ba1 O5W 63.77(7) . . ? 
O2W Ba1 O5W 141.62(9) . . ? 
O1 Ba1 O5W 54.45(9) . . ? 
O3W Ba1 O5W 65.43(9) . . ? 
N4 Ba1 O5W 139.50(10) . . ? 
N3 Ba1 O5W 123.22(11) . . ? 
O7 Ba1 H2W 142.6(12) 1_655 . ? 
O1W Ba1 H2W 18.0(5) . . ? 
O4W Ba1 H2W 144.6(12) . . ? 
O2W Ba1 H2W 56.0(8) . . ? 
O1 Ba1 H2W 77.8(8) . . ? 
O3W Ba1 H2W 71.8(11) . . ? 
N4 Ba1 H2W 106.3(6) . . ? 
N3 Ba1 H2W 74.1(11) . . ? 
O5W Ba1 H2W 112.1(5) . . ? 
O7 Ba1 H6W 92.1(5) 1_655 . ? 
O1W Ba1 H6W 44.3(5) . . ? 
O4W Ba1 H6W 131.5(12) . . ? 
O2W Ba1 H6W 77.3(13) . . ? 
O1 Ba1 H6W 78.7(11) . . ? 
O3W Ba1 H6W 17.9(5) . . ? 
N4 Ba1 H6W 149.6(13) . . ? 
N3 Ba1 H6W 128.0(5) . . ? 
O5W Ba1 H6W 67.7(12) . . ? 
H2W Ba1 H6W 57.1(12) . . ? 
O7 Ba1 H10W 82.8(4) 1_655 . ? 
O1W Ba1 H10W 86.0(7) . . ? 
O4W Ba1 H10W 62.2(7) . . ? 
O2W Ba1 H10W 148.2(7) . . ? 
O1 Ba1 H10W 37.7(4) . . ? 
O3W Ba1 H10W 73.9(6) . . ? 
N4 Ba1 H10W 139.3(7) . . ? 
N3 Ba1 H10W 107.6(4) . . ? 
O5W Ba1 H10W 16.9(3) . . ? 
H2W Ba1 H10W 103.3(8) . . ? 
H6W Ba1 H10W 71.0(14) . . ? 
O5W Ba2 O8 112.79(9) . 1_655 ? 
O5W Ba2 O5 163.88(8) . . ? 
O8 Ba2 O5 83.16(10) 1_655 . ? 
O5W Ba2 N5 68.64(9) . . ? 
O8 Ba2 N5 127.97(12) 1_655 . ? 
O5 Ba2 N5 100.13(11) . . ? 
O5W Ba2 O7W 125.20(8) . . ? 
O8 Ba2 O7W 77.94(12) 1_655 . ? 
O5 Ba2 O7W 58.44(9) . . ? 
N5 Ba2 O7W 146.75(12) . . ? 
O5W Ba2 O7 67.09(7) . 1_655 ? 
O8 Ba2 O7 46.11(9) 1_655 1_655 ? 
O5 Ba2 O7 129.02(8) . 1_655 ? 
N5 Ba2 O7 114.06(10) . 1_655 ? 
O7W Ba2 O7 98.97(10) . 1_655 ? 
O5W Ba2 N6 105.56(11) . . ? 
O8 Ba2 N6 75.70(13) 1_655 . ? 
O5 Ba2 N6 75.20(11) . . ? 
N5 Ba2 N6 55.89(13) . . ? 
O7W Ba2 N6 128.65(12) . . ? 
O7 Ba2 N6 93.37(11) 1_655 . ? 
O5W Ba2 O6W 67.24(7) . . ? 
O8 Ba2 O6W 142.74(10) 1_655 . ? 
O5 Ba2 O6W 101.82(8) . . ? 
N5 Ba2 O6W 87.94(10) . . ? 
O7W Ba2 O6W 73.89(10) . . ? 
O7 Ba2 O6W 115.48(7) 1_655 . ? 
N6 Ba2 O6W 141.48(11) . . ? 
O5W Ba2 O6 119.19(8) . . ? 
O8 Ba2 O6 127.78(10) 1_655 . ? 
O5 Ba2 O6 44.72(9) . . ? 
N5 Ba2 O6 70.68(12) . . ? 
O7W Ba2 O6 76.70(11) . . ? 
O7 Ba2 O6 173.64(8) 1_655 . ? 
N6 Ba2 O6 85.92(12) . . ? 
O6W Ba2 O6 68.09(8) . . ? 
O5W Ba2 O4W 63.35(7) . . ? 
O8 Ba2 O4W 90.83(9) 1_655 . ? 
O5 Ba2 O4W 121.03(8) . . ? 
N5 Ba2 O4W 127.33(10) . . ? 
O7W Ba2 O4W 62.93(8) . . ? 
O7 Ba2 O4W 65.06(7) 1_655 . ? 
N6 Ba2 O4W 158.01(11) . . ? 
O6W Ba2 O4W 54.69(7) . . ? 
O6 Ba2 O4W 116.00(9) . . ? 
O5W Ba2 C16 89.86(8) . 1_655 ? 
O8 Ba2 C16 23.34(9) 1_655 1_655 ? 
O5 Ba2 C16 106.21(9) . 1_655 ? 
N5 Ba2 C16 124.90(11) . 1_655 ? 
O7W Ba2 C16 87.33(11) . 1_655 ? 
O7 Ba2 C16 22.84(7) 1_655 1_655 ? 
N6 Ba2 C16 85.40(11) . 1_655 ? 
O6W Ba2 C16 130.63(8) . 1_655 ? 
O6 Ba2 C16 150.94(9) . 1_655 ? 
O4W Ba2 C16 76.03(7) . 1_655 ? 
O5W Ba2 H14W 110.7(8) . . ? 
O8 Ba2 H14W 93.8(6) 1_655 . ? 
O5 Ba2 H14W 68.8(10) . . ? 
N5 Ba2 H14W 136.2(8) . . ? 
O7W Ba2 H14W 18.2(4) . . ? 
O7 Ba2 H14W 104.3(11) 1_655 . ? 
N6 Ba2 H14W 143.5(9) . . ? 
O6W Ba2 H14W 55.8(4) . . ? 
O6 Ba2 H14W 73.0(11) . . ? 
O4W Ba2 H14W 53.1(11) . . ? 
C16 Ba2 H14W 98.6(9) 1_655 . ? 
C10 C15 C14 121.5(5) . . ? 
C10 C15 H15 119.2 . . ? 
C14 C15 H15 119.2 . . ? 
C11 C10 C15 121.6(5) . . ? 
C11 C10 C9 119.6(4) . . ? 
C15 C10 C9 118.8(5) . . ? 
C4 N1 H1A 111(4) . . ? 
C4 N1 H2A 132(4) . . ? 
H1A N1 H2A 116(3) . . ? 
C14 N2 H3A 115(3) . . ? 
C14 N2 H4A 122(3) . . ? 
H3A N2 H4A 114(3) . . ? 
C17 N3 C21 118.1(7) . . ? 
C17 N3 Ba1 119.4(4) . . ? 
C21 N3 Ba1 122.0(4) . . ? 
C28 N4 C22 117.8(5) . . ? 
C28 N4 Ba1 119.6(4) . . ? 
C22 N4 Ba1 121.5(4) . . ? 
C29 N5 C33 117.9(5) . . ? 
C29 N5 Ba2 115.9(3) . . ? 
C33 N5 Ba2 125.7(4) . . ? 
N6 C34 C35 123.4(6) . . ? 
N6 C34 C33 118.5(6) . . ? 
C35 C34 C33 118.1(6) . . ? 
C26 C23 C24 123.0(6) . . ? 
C26 C23 C22 117.7(5) . . ? 
C24 C23 C22 119.4(6) . . ? 
C12 C13 C14 120.4(5) . . ? 
C12 C13 H13 119.8 . . ? 
C14 C13 H13 119.8 . . ? 
N5 C33 C32 122.7(6) . . ? 
N5 C33 C34 117.6(5) . . ? 
C32 C33 C34 119.6(5) . . ? 
C31 C32 C33 116.5(6) . . ? 
C31 C32 C37 123.2(6) . . ? 
C33 C32 C37 120.3(6) . . ? 
N4 C22 C21 120.0(5) . . ? 
N4 C22 C23 121.2(5) . . ? 
C21 C22 C23 118.8(5) . . ? 
C19 C20 C21 117.9(6) . . ? 
C19 C20 C25 123.0(6) . . ? 
C21 C20 C25 119.1(6) . . ? 
C18 C19 C20 121.0(6) . . ? 
C18 C19 H19 119.5 . . ? 
C20 C19 H19 119.5 . . ? 
C24 C25 C20 121.2(6) . . ? 
C24 C25 H25 119.4 . . ? 
C20 C25 H25 119.4 . . ? 
C25 C24 C23 121.6(6) . . ? 
C25 C24 H24 119.2 . . ? 
C23 C24 H24 119.2 . . ? 
C26 C27 C28 120.1(5) . . ? 
C26 C27 H27 119.9 . . ? 
C28 C27 H27 119.9 . . ? 
C27 C26 C23 118.7(6) . . ? 
C27 C26 H26 120.6 . . ? 
C23 C26 H26 120.6 . . ? 
C36 C37 C32 119.8(6) . . ? 
C36 C37 H37 120.1 . . ? 
C32 C37 H37 120.1 . . ? 
N3 C17 C18 124.6(6) . . ? 
N3 C17 H17 117.7 . . ? 
C18 C17 H17 117.7 . . ? 
C30 C31 C32 121.8(6) . . ? 
C30 C31 H31 119.1 . . ? 
C32 C31 H31 119.1 . . ? 
C19 C18 C17 116.6(6) . . ? 
C19 C18 H18 121.7 . . ? 
C17 C18 H18 121.7 . . ? 
N5 C29 C30 124.5(5) . . ? 
N5 C29 H29 117.8 . . ? 
C30 C29 H29 117.8 . . ? 
C31 C30 C29 116.6(6) . . ? 
C31 C30 H30 121.7 . . ? 
C29 C30 H30 121.7 . . ? 
N4 C28 C27 124.4(5) . . ? 
N4 C28 H28 117.8 . . ? 
C27 C28 H28 117.8 . . ? 
C10 C11 C12 118.6(4) . . ? 
C10 C11 H11 120.7 . . ? 
C12 C11 H11 120.7 . . ? 
C1 O1 Ba1 139.2(3) . . ? 
Ba1 O1W H2W 84(5) . . ? 
Ba1 O1W H1W 119(4) . . ? 
H2W O1W H1W 117(3) . . ? 
Ba1 O2W H3W 100(3) . . ? 
Ba1 O2W H4W 126(3) . . ? 
H3W O2W H4W 118(3) . . ? 
Ba1 O3W H5W 125(3) . . ? 
Ba1 O3W H6W 89(4) . . ? 
H5W O3W H6W 113(3) . . ? 
Ba1 O4W Ba2 101.72(8) . . ? 
Ba1 O4W H7W 112(3) . . ? 
Ba2 O4W H7W 83(3) . . ? 
Ba1 O4W H8W 115(3) . . ? 
Ba2 O4W H8W 129(3) . . ? 
H7W O4W H8W 113(3) . . ? 
Ba2 O5W Ba1 99.26(7) . . ? 
Ba2 O5W H9W 124(2) . . ? 
Ba1 O5W H9W 107(3) . . ? 
Ba2 O5W H10W 125(2) . . ? 
Ba1 O5W H10W 74(3) . . ? 
H9W O5W H10W 109(2) . . ? 
Ba2 O6W H11W 105(3) . . ? 
Ba2 O6W H12W 127(3) . . ? 
H11W O6W H12W 109(3) . . ? 
Ba2 O7W H13W 137(3) . . ? 
Ba2 O7W H14W 81(4) . . ? 
H13W O7W H14W 106(3) . . ? 
H15W O8W H16W 106(3) . . ? 
H17W O9W H18W 105(3) . . ? 
C9 O5 Ba2 99.0(2) . . ? 
C3 C2 C7 120.0(4) . . ? 
C3 C2 C1 119.9(3) . . ? 
C7 C2 C1 120.1(3) . . ? 
O2 C1 O1 125.5(4) . . ? 
O2 C1 C2 118.4(3) . . ? 
O1 C1 C2 116.1(3) . . ? 
O6 C9 O5 123.2(3) . . ? 
O6 C9 C10 118.8(4) . . ? 
O5 C9 C10 118.0(4) . . ? 
O7 C16 O8 123.9(3) . . ? 
O7 C16 C12 117.7(3) . . ? 
O8 C16 C12 118.4(3) . . ? 
O7 C16 Ba2 63.61(17) . 1_455 ? 
O8 C16 Ba2 60.6(2) . 1_455 ? 
C12 C16 Ba2 173.5(2) . 1_455 ? 
C2 C3 C4 121.3(3) . . ? 
C2 C3 H3 119.4 . . ? 
C4 C3 H3 119.4 . . ? 
C46 N8 C52 117.7(6) . . ? 
C53 N9 C57 115.5(6) . . ? 
C41 N7 C45 117.2(5) . . ? 
C58 N10 C62 118.5(6) . . ? 
C6 C5 C4 119.1(5) . . ? 
C6 C5 H5 120.4 . . ? 
C4 C5 H5 120.4 . . ? 
N8 C46 C47 122.1(6) . . ? 
N8 C46 C45 118.0(6) . . ? 
C47 C46 C45 120.0(6) . . ? 
N9 C57 C56 123.1(6) . . ? 
N9 C57 C58 117.9(6) . . ? 
C56 C57 C58 119.0(6) . . ? 
C48 C49 C44 121.9(5) . . ? 
C48 C49 H49 119.0 . . ? 
C44 C49 H49 119.0 . . ? 
N7 C45 C44 121.1(6) . . ? 
N7 C45 C46 120.4(6) . . ? 
C44 C45 C46 118.5(5) . . ? 
N10 C58 C59 122.3(7) . . ? 
N10 C58 C57 117.4(5) . . ? 
C59 C58 C57 120.3(7) . . ? 
N9 C53 C54 124.1(7) . . ? 
N9 C53 H53 118.0 . . ? 
C54 C53 H53 118.0 . . ? 
C46 C47 C50 116.4(6) . . ? 
C46 C47 C48 119.8(5) . . ? 
C50 C47 C48 123.8(6) . . ? 
C54 C55 C56 121.0(7) . . ? 
C54 C55 H55 119.5 . . ? 
C56 C55 H55 119.5 . . ? 
N1 C4 C3 120.6(4) . . ? 
N1 C4 C5 120.4(4) . . ? 
C3 C4 C5 118.9(4) . . ? 
C43 C44 C45 118.4(5) . . ? 
C43 C44 C49 123.0(5) . . ? 
C45 C44 C49 118.7(5) . . ? 
C61 C60 C59 122.5(7) . . ? 
C61 C60 H60 118.8 . . ? 
C59 C60 H60 118.8 . . ? 
C16 O8 Ba2 96.1(2) . 1_455 ? 
C9 O6 Ba2 92.9(2) . . ? 
C43 C42 C41 118.3(6) . . ? 
C43 C42 H42 120.8 . . ? 
C41 C42 H42 120.8 . . ? 
C16 O7 Ba1 142.5(2) . 1_455 ? 
C16 O7 Ba2 93.55(19) . 1_455 ? 
Ba1 O7 Ba2 104.09(8) 1_455 1_455 ? 
N3 C21 C20 121.8(7) . . ? 
N3 C21 C22 118.3(6) . . ? 
C20 C21 C22 119.9(6) . . ? 
C50 C51 C52 118.1(6) . . ? 
C50 C51 H51 120.9 . . ? 
C52 C51 H51 120.9 . . ? 
C51 C50 C47 121.1(6) . . ? 
C51 C50 H50 119.5 . . ? 
C47 C50 H50 119.5 . . ? 
C49 C48 C47 121.1(5) . . ? 
C49 C48 H48 119.5 . . ? 
C47 C48 H48 119.5 . . ? 
N7 C41 C42 125.5(6) . . ? 
N7 C41 H41 117.3 . . ? 
C42 C41 H41 117.3 . . ? 
C42 C43 C44 119.5(5) . . ? 
C42 C43 H43 120.2 . . ? 
C44 C43 H43 120.2 . . ? 
C40 N6 C34 116.8(6) . . ? 
C40 N6 Ba2 121.2(4) . . ? 
C34 N6 Ba2 121.7(4) . . ? 
C6 C7 C2 119.7(5) . . ? 
C6 C7 H7A 120.2 . . ? 
C2 C7 H7A 120.2 . . ? 
O4 C8 O3 126.4(5) . . ? 
O4 C8 C6 115.5(5) . . ? 
O3 C8 C6 118.0(5) . . ? 
C7 C6 C5 121.0(5) . . ? 
C7 C6 C8 119.6(5) . . ? 
C5 C6 C8 119.3(5) . . ? 
N6 C40 C39 123.8(7) . . ? 
N6 C40 H40 118.1 . . ? 
C39 C40 H40 118.1 . . ? 
C39 C38 C35 119.2(6) . . ? 
C39 C38 H38 120.4 . . ? 
C35 C38 H38 120.4 . . ? 
C55 C56 C57 117.8(6) . . ? 
C55 C56 C61 124.8(7) . . ? 
C57 C56 C61 117.4(7) . . ? 
C34 C35 C38 116.9(6) . . ? 
C34 C35 C36 119.7(6) . . ? 
C38 C35 C36 123.3(6) . . ? 
C38 C39 C40 119.9(6) . . ? 
C38 C39 H39 120.1 . . ? 
C40 C39 H39 120.1 . . ? 
N10 C62 C63 123.0(7) . . ? 
N10 C62 H62 118.5 . . ? 
C63 C62 H62 118.5 . . ? 
C55 C54 C53 118.5(8) . . ? 
C55 C54 H54 120.8 . . ? 
C53 C54 H54 120.8 . . ? 
C60 C59 C58 118.5(7) . . ? 
C60 C59 C64 125.5(6) . . ? 
C58 C59 C64 115.9(7) . . ? 
C60 C61 C56 122.3(7) . . ? 
C60 C61 H61 118.9 . . ? 
C56 C61 H61 118.9 . . ? 
C64 C63 C62 119.5(7) . . ? 
C64 C63 H63 120.3 . . ? 
C62 C63 H63 120.3 . . ? 
N8 C52 C51 124.6(6) . . ? 
N8 C52 H52 117.7 . . ? 
C51 C52 H52 117.7 . . ? 
C63 C64 C59 120.8(6) . . ? 
C63 C64 H64 119.6 . . ? 
C59 C64 H64 119.6 . . ? 
C11 C12 C13 120.7(4) . . ? 
C11 C12 C16 120.9(3) . . ? 
C13 C12 C16 118.3(3) . . ? 
N2 C14 C15 121.4(5) . . ? 
N2 C14 C13 121.3(5) . . ? 
C15 C14 C13 117.3(5) . . ? 
C37 C36 C35 122.4(6) . . ? 
C37 C36 H36 118.8 . . ? 
C35 C36 H36 118.8 . . ? 
 
loop_ 
 _geom_torsion_atom_site_label_1 
 _geom_torsion_atom_site_label_2 
 _geom_torsion_atom_site_label_3 
 _geom_torsion_atom_site_label_4 
 _geom_torsion 
 _geom_torsion_site_symmetry_1 
 _geom_torsion_site_symmetry_2 
 _geom_torsion_site_symmetry_3 
 _geom_torsion_site_symmetry_4 
 _geom_torsion_publ_flag 
C14 C15 C10 C11 -0.5(8) . . . . ? 
C14 C15 C10 C9 -179.7(4) . . . . ? 
O7 Ba1 N3 C17 -139.5(4) 1_655 . . . ? 
O1W Ba1 N3 C17 44.1(5) . . . . ? 
O4W Ba1 N3 C17 -96.1(5) . . . . ? 
O2W Ba1 N3 C17 113.8(5) . . . . ? 
O1 Ba1 N3 C17 -21.9(5) . . . . ? 
O3W Ba1 N3 C17 47.2(6) . . . . ? 
N4 Ba1 N3 C17 -177.8(5) . . . . ? 
O5W Ba1 N3 C17 -46.8(5) . . . . ? 
O7 Ba1 N3 C21 49.0(5) 1_655 . . . ? 
O1W Ba1 N3 C21 -127.3(4) . . . . ? 
O4W Ba1 N3 C21 92.4(4) . . . . ? 
O2W Ba1 N3 C21 -57.7(4) . . . . ? 
O1 Ba1 N3 C21 166.6(4) . . . . ? 
O3W Ba1 N3 C21 -124.2(4) . . . . ? 
N4 Ba1 N3 C21 10.7(4) . . . . ? 
O5W Ba1 N3 C21 141.7(4) . . . . ? 
O7 Ba1 N4 C28 24.3(4) 1_655 . . . ? 
O1W Ba1 N4 C28 -126.0(4) . . . . ? 
O4W Ba1 N4 C28 94.7(4) . . . . ? 
O2W Ba1 N4 C28 -76.3(4) . . . . ? 
O1 Ba1 N4 C28 152.0(4) . . . . ? 
O3W Ba1 N4 C28 -40.5(5) . . . . ? 
N3 Ba1 N4 C28 -179.2(4) . . . . ? 
O5W Ba1 N4 C28 77.2(4) . . . . ? 
O7 Ba1 N4 C22 -167.6(4) 1_655 . . . ? 
O1W Ba1 N4 C22 42.1(4) . . . . ? 
O4W Ba1 N4 C22 -97.2(4) . . . . ? 
O2W Ba1 N4 C22 91.8(4) . . . . ? 
O1 Ba1 N4 C22 -39.9(4) . . . . ? 
O3W Ba1 N4 C22 127.6(4) . . . . ? 
N3 Ba1 N4 C22 -11.1(4) . . . . ? 
O5W Ba1 N4 C22 -114.7(4) . . . . ? 
O5W Ba2 N5 C29 -53.2(3) . . . . ? 
O8 Ba2 N5 C29 -156.1(3) 1_655 . . . ? 
O5 Ba2 N5 C29 114.7(4) . . . . ? 
O7W Ba2 N5 C29 69.0(4) . . . . ? 
O7 Ba2 N5 C29 -104.0(4) 1_655 . . . ? 
N6 Ba2 N5 C29 179.0(4) . . . . ? 
O6W Ba2 N5 C29 13.1(4) . . . . ? 
O6 Ba2 N5 C29 80.6(4) . . . . ? 
O4W Ba2 N5 C29 -27.9(4) . . . . ? 
C16 Ba2 N5 C29 -127.2(3) 1_655 . . . ? 
O5W Ba2 N5 C33 135.0(4) . . . . ? 
O8 Ba2 N5 C33 32.2(5) 1_655 . . . ? 
O5 Ba2 N5 C33 -57.0(4) . . . . ? 
O7W Ba2 N5 C33 -102.8(4) . . . . ? 
O7 Ba2 N5 C33 84.2(4) 1_655 . . . ? 
N6 Ba2 N5 C33 7.2(4) . . . . ? 
O6W Ba2 N5 C33 -158.7(4) . . . . ? 
O6 Ba2 N5 C33 -91.2(4) . . . . ? 
O4W Ba2 N5 C33 160.3(4) . . . . ? 
C16 Ba2 N5 C33 61.0(4) 1_655 . . . ? 
C29 N5 C33 C32 1.9(8) . . . . ? 
Ba2 N5 C33 C32 173.5(4) . . . . ? 
C29 N5 C33 C34 -179.5(5) . . . . ? 
Ba2 N5 C33 C34 -7.9(7) . . . . ? 
N6 C34 C33 N5 1.1(8) . . . . ? 
C35 C34 C33 N5 -179.6(5) . . . . ? 
N6 C34 C33 C32 179.7(5) . . . . ? 
C35 C34 C33 C32 -1.0(8) . . . . ? 
N5 C33 C32 C31 -1.8(8) . . . . ? 
C34 C33 C32 C31 179.6(6) . . . . ? 
N5 C33 C32 C37 179.1(6) . . . . ? 
C34 C33 C32 C37 0.5(9) . . . . ? 
C28 N4 C22 C21 -179.9(5) . . . . ? 
Ba1 N4 C22 C21 11.8(7) . . . . ? 
C28 N4 C22 C23 1.6(8) . . . . ? 
Ba1 N4 C22 C23 -166.8(4) . . . . ? 
C26 C23 C22 N4 -1.1(8) . . . . ? 
C24 C23 C22 N4 -179.5(5) . . . . ? 
C26 C23 C22 C21 -179.7(5) . . . . ? 
C24 C23 C22 C21 1.9(8) . . . . ? 
C21 C20 C19 C18 1.9(10) . . . . ? 
C25 C20 C19 C18 179.1(7) . . . . ? 
C19 C20 C25 C24 -179.7(7) . . . . ? 
C21 C20 C25 C24 -2.5(10) . . . . ? 
C20 C25 C24 C23 0.8(10) . . . . ? 
C26 C23 C24 C25 -178.7(6) . . . . ? 
C22 C23 C24 C25 -0.5(9) . . . . ? 
C28 C27 C26 C23 0.7(8) . . . . ? 
C24 C23 C26 C27 178.3(6) . . . . ? 
C22 C23 C26 C27 0.0(8) . . . . ? 
C31 C32 C37 C36 -179.2(6) . . . . ? 
C33 C32 C37 C36 -0.2(10) . . . . ? 
C21 N3 C17 C18 -0.8(10) . . . . ? 
Ba1 N3 C17 C18 -172.6(5) . . . . ? 
C33 C32 C31 C30 0.6(9) . . . . ? 
C37 C32 C31 C30 179.7(6) . . . . ? 
C20 C19 C18 C17 -3.0(10) . . . . ? 
N3 C17 C18 C19 2.6(11) . . . . ? 
C33 N5 C29 C30 -0.8(8) . . . . ? 
Ba2 N5 C29 C30 -173.2(4) . . . . ? 
C32 C31 C30 C29 0.4(9) . . . . ? 
N5 C29 C30 C31 -0.4(8) . . . . ? 
C22 N4 C28 C27 -0.8(8) . . . . ? 
Ba1 N4 C28 C27 167.7(4) . . . . ? 
C26 C27 C28 N4 -0.3(9) . . . . ? 
C15 C10 C11 C12 1.1(6) . . . . ? 
C9 C10 C11 C12 -179.6(3) . . . . ? 
O7 Ba1 O1 C1 -129.6(4) 1_655 . . . ? 
O1W Ba1 O1 C1 1.0(4) . . . . ? 
O4W Ba1 O1 C1 175.7(5) . . . . ? 
O2W Ba1 O1 C1 16.3(5) . . . . ? 
O3W Ba1 O1 C1 -56.3(4) . . . . ? 
N4 Ba1 O1 C1 116.1(4) . . . . ? 
N3 Ba1 O1 C1 91.4(4) . . . . ? 
O5W Ba1 O1 C1 -114.2(5) . . . . ? 
O7 Ba1 O4W Ba2 -32.21(7) 1_655 . . . ? 
O1W Ba1 O4W Ba2 106.20(14) . . . . ? 
O2W Ba1 O4W Ba2 -110.13(16) . . . . ? 
O1 Ba1 O4W Ba2 99.21(11) . . . . ? 
O3W Ba1 O4W Ba2 20.83(14) . . . . ? 
N4 Ba1 O4W Ba2 -126.71(12) . . . . ? 
N3 Ba1 O4W Ba2 175.73(13) . . . . ? 
O5W Ba1 O4W Ba2 40.72(7) . . . . ? 
O5W Ba2 O4W Ba1 -44.42(8) . . . . ? 
O8 Ba2 O4W Ba1 70.81(10) 1_655 . . . ? 
O5 Ba2 O4W Ba1 153.32(8) . . . . ? 
N5 Ba2 O4W Ba1 -70.89(14) . . . . ? 
O7W Ba2 O4W Ba1 146.80(13) . . . . ? 
O7 Ba2 O4W Ba1 31.28(7) 1_655 . . . ? 
N6 Ba2 O4W Ba1 19.4(3) . . . . ? 
O6W Ba2 O4W Ba1 -124.34(11) . . . . ? 
O6 Ba2 O4W Ba1 -155.66(9) . . . . ? 
C16 Ba2 O4W Ba1 52.59(9) 1_655 . . . ? 
O8 Ba2 O5W Ba1 -39.62(12) 1_655 . . . ? 
O5 Ba2 O5W Ba1 149.2(3) . . . . ? 
N5 Ba2 O5W Ba1 -163.14(12) . . . . ? 
O7W Ba2 O5W Ba1 51.47(14) . . . . ? 
O7 Ba2 O5W Ba1 -33.31(7) 1_655 . . . ? 
N6 Ba2 O5W Ba1 -120.35(11) . . . . ? 
O6W Ba2 O5W Ba1 99.84(8) . . . . ? 
O6 Ba2 O5W Ba1 145.58(10) . . . . ? 
O4W Ba2 O5W Ba1 39.23(7) . . . . ? 
C16 Ba2 O5W Ba1 -35.17(8) 1_655 . . . ? 
O7 Ba1 O5W Ba2 36.05(7) 1_655 . . . ? 
O1W Ba1 O5W Ba2 175.03(9) . . . . ? 
O4W Ba1 O5W Ba2 -43.23(7) . . . . ? 
O2W Ba1 O5W Ba2 112.79(13) . . . . ? 
O1 Ba1 O5W Ba2 -129.43(13) . . . . ? 
O3W Ba1 O5W Ba2 119.26(12) . . . . ? 
N4 Ba1 O5W Ba2 -24.13(18) . . . . ? 
N3 Ba1 O5W Ba2 -99.55(13) . . . . ? 
O5W Ba2 O5 C9 -6.4(4) . . . . ? 
O8 Ba2 O5 C9 -178.2(2) 1_655 . . . ? 
N5 Ba2 O5 C9 -50.8(2) . . . . ? 
O7W Ba2 O5 C9 101.7(2) . . . . ? 
O7 Ba2 O5 C9 176.5(2) 1_655 . . . ? 
N6 Ba2 O5 C9 -101.3(2) . . . . ? 
O6W Ba2 O5 C9 39.2(2) . . . . ? 
O6 Ba2 O5 C9 -1.9(2) . . . . ? 
O4W Ba2 O5 C9 94.9(2) . . . . ? 
C16 Ba2 O5 C9 178.1(2) 1_655 . . . ? 
Ba1 O1 C1 O2 -32.2(6) . . . . ? 
Ba1 O1 C1 C2 145.5(3) . . . . ? 
C3 C2 C1 O2 12.9(5) . . . . ? 
C7 C2 C1 O2 -168.5(4) . . . . ? 
C3 C2 C1 O1 -165.0(4) . . . . ? 
C7 C2 C1 O1 13.6(5) . . . . ? 
Ba2 O5 C9 O6 3.9(4) . . . . ? 
Ba2 O5 C9 C10 -173.1(3) . . . . ? 
C11 C10 C9 O6 18.7(6) . . . . ? 
C15 C10 C9 O6 -162.1(4) . . . . ? 
C11 C10 C9 O5 -164.2(4) . . . . ? 
C15 C10 C9 O5 15.1(6) . . . . ? 
C7 C2 C3 C4 0.3(6) . . . . ? 
C1 C2 C3 C4 179.0(3) . . . . ? 
C52 N8 C46 C47 -0.3(8) . . . . ? 
C52 N8 C46 C45 178.8(5) . . . . ? 
C53 N9 C57 C56 -1.4(9) . . . . ? 
C53 N9 C57 C58 177.6(6) . . . . ? 
C41 N7 C45 C44 -2.8(8) . . . . ? 
C41 N7 C45 C46 176.2(5) . . . . ? 
N8 C46 C45 N7 -0.8(8) . . . . ? 
C47 C46 C45 N7 178.4(5) . . . . ? 
N8 C46 C45 C44 178.2(5) . . . . ? 
C47 C46 C45 C44 -2.6(8) . . . . ? 
C62 N10 C58 C59 0.9(8) . . . . ? 
C62 N10 C58 C57 -178.3(5) . . . . ? 
N9 C57 C58 N10 -2.4(8) . . . . ? 
C56 C57 C58 N10 176.6(5) . . . . ? 
N9 C57 C58 C59 178.3(5) . . . . ? 
C56 C57 C58 C59 -2.7(8) . . . . ? 
C57 N9 C53 C54 0.0(9) . . . . ? 
N8 C46 C47 C50 -0.2(8) . . . . ? 
C45 C46 C47 C50 -179.4(5) . . . . ? 
N8 C46 C47 C48 179.6(5) . . . . ? 
C45 C46 C47 C48 0.4(8) . . . . ? 
C2 C3 C4 N1 -175.8(4) . . . . ? 
C2 C3 C4 C5 1.3(6) . . . . ? 
C6 C5 C4 N1 175.7(5) . . . . ? 
C6 C5 C4 C3 -1.5(7) . . . . ? 
N7 C45 C44 C43 1.6(8) . . . . ? 
C46 C45 C44 C43 -177.4(5) . . . . ? 
N7 C45 C44 C49 -178.1(5) . . . . ? 
C46 C45 C44 C49 2.9(7) . . . . ? 
C48 C49 C44 C43 179.2(5) . . . . ? 
C48 C49 C44 C45 -1.2(8) . . . . ? 
O7 C16 O8 Ba2 -6.5(4) . . . 1_455 ? 
C12 C16 O8 Ba2 172.7(2) . . . 1_455 ? 
O5 C9 O6 Ba2 -3.7(4) . . . . ? 
C10 C9 O6 Ba2 173.3(3) . . . . ? 
O5W Ba2 O6 C9 -179.5(2) . . . . ? 
O8 Ba2 O6 C9 6.6(3) 1_655 . . . ? 
O5 Ba2 O6 C9 1.9(2) . . . . ? 
N5 Ba2 O6 C9 130.2(3) . . . . ? 
O7W Ba2 O6 C9 -56.4(2) . . . . ? 
O7 Ba2 O6 C9 -8.8(10) 1_655 . . . ? 
N6 Ba2 O6 C9 75.0(3) . . . . ? 
O6W Ba2 O6 C9 -134.1(3) . . . . ? 
O4W Ba2 O6 C9 -106.9(2) . . . . ? 
C16 Ba2 O6 C9 2.0(4) 1_655 . . . ? 
O8 C16 O7 Ba1 125.1(4) . . . 1_455 ? 
C12 C16 O7 Ba1 -54.1(5) . . . 1_455 ? 
Ba2 C16 O7 Ba1 118.8(3) 1_455 . . 1_455 ? 
O8 C16 O7 Ba2 6.3(4) . . . 1_455 ? 
C12 C16 O7 Ba2 -172.9(2) . . . 1_455 ? 
C17 N3 C21 C20 -0.5(9) . . . . ? 
Ba1 N3 C21 C20 171.1(4) . . . . ? 
C17 N3 C21 C22 178.3(6) . . . . ? 
Ba1 N3 C21 C22 -10.2(7) . . . . ? 
C19 C20 C21 N3 0.0(9) . . . . ? 
C25 C20 C21 N3 -177.3(5) . . . . ? 
C19 C20 C21 C22 -178.8(6) . . . . ? 
C25 C20 C21 C22 3.9(9) . . . . ? 
N4 C22 C21 N3 -1.1(8) . . . . ? 
C23 C22 C21 N3 177.5(5) . . . . ? 
N4 C22 C21 C20 177.7(6) . . . . ? 
C23 C22 C21 C20 -3.7(8) . . . . ? 
C52 C51 C50 C47 -3.8(9) . . . . ? 
C46 C47 C50 C51 2.4(8) . . . . ? 
C48 C47 C50 C51 -177.4(6) . . . . ? 
C44 C49 C48 C47 -1.1(9) . . . . ? 
C46 C47 C48 C49 1.5(8) . . . . ? 
C50 C47 C48 C49 -178.8(6) . . . . ? 
C45 N7 C41 C42 1.9(9) . . . . ? 
C43 C42 C41 N7 0.3(10) . . . . ? 
C41 C42 C43 C44 -1.7(9) . . . . ? 
C45 C44 C43 C42 0.7(8) . . . . ? 
C49 C44 C43 C42 -179.6(6) . . . . ? 
C35 C34 N6 C40 0.1(9) . . . . ? 
C33 C34 N6 C40 179.4(6) . . . . ? 
C35 C34 N6 Ba2 -173.7(4) . . . . ? 
C33 C34 N6 Ba2 5.6(7) . . . . ? 
O5W Ba2 N6 C40 130.4(4) . . . . ? 
O8 Ba2 N6 C40 20.2(4) 1_655 . . . ? 
O5 Ba2 N6 C40 -66.3(4) . . . . ? 
N5 Ba2 N6 C40 -179.8(5) . . . . ? 
O7W Ba2 N6 C40 -41.1(5) . . . . ? 
O7 Ba2 N6 C40 63.2(5) 1_655 . . . ? 
O6W Ba2 N6 C40 -156.8(4) . . . . ? 
O6 Ba2 N6 C40 -110.4(5) . . . . ? 
O4W Ba2 N6 C40 74.0(6) . . . . ? 
C16 Ba2 N6 C40 41.8(4) 1_655 . . . ? 
O5W Ba2 N6 C34 -56.1(4) . . . . ? 
O8 Ba2 N6 C34 -166.2(4) 1_655 . . . ? 
O5 Ba2 N6 C34 107.2(4) . . . . ? 
N5 Ba2 N6 C34 -6.3(4) . . . . ? 
O7W Ba2 N6 C34 132.4(4) . . . . ? 
O7 Ba2 N6 C34 -123.3(4) 1_655 . . . ? 
O6W Ba2 N6 C34 16.7(5) . . . . ? 
O6 Ba2 N6 C34 63.1(4) . . . . ? 
O4W Ba2 N6 C34 -112.5(4) . . . . ? 
C16 Ba2 N6 C34 -144.7(4) 1_655 . . . ? 
C3 C2 C7 C6 -1.9(6) . . . . ? 
C1 C2 C7 C6 179.5(4) . . . . ? 
C2 C7 C6 C5 1.7(7) . . . . ? 
C2 C7 C6 C8 -176.1(4) . . . . ? 
C4 C5 C6 C7 0.0(8) . . . . ? 
C4 C5 C6 C8 177.8(5) . . . . ? 
O4 C8 C6 C7 174.8(5) . . . . ? 
O3 C8 C6 C7 -6.7(8) . . . . ? 
O4 C8 C6 C5 -3.1(7) . . . . ? 
O3 C8 C6 C5 175.5(5) . . . . ? 
C34 N6 C40 C39 -0.4(9) . . . . ? 
Ba2 N6 C40 C39 173.4(5) . . . . ? 
C54 C55 C56 C57 -1.6(10) . . . . ? 
C54 C55 C56 C61 178.7(7) . . . . ? 
N9 C57 C56 C55 2.3(9) . . . . ? 
C58 C57 C56 C55 -176.7(6) . . . . ? 
N9 C57 C56 C61 -178.0(6) . . . . ? 
C58 C57 C56 C61 3.0(8) . . . . ? 
N6 C34 C35 C38 -0.6(9) . . . . ? 
C33 C34 C35 C38 -179.9(5) . . . . ? 
N6 C34 C35 C36 -179.6(5) . . . . ? 
C33 C34 C35 C36 1.1(9) . . . . ? 
C39 C38 C35 C34 1.3(9) . . . . ? 
C39 C38 C35 C36 -179.7(6) . . . . ? 
C35 C38 C39 C40 -1.6(9) . . . . ? 
N6 C40 C39 C38 1.2(10) . . . . ? 
C58 N10 C62 C63 -0.3(8) . . . . ? 
C56 C55 C54 C53 0.3(11) . . . . ? 
N9 C53 C54 C55 0.6(11) . . . . ? 
C61 C60 C59 C58 1.5(9) . . . . ? 
C61 C60 C59 C64 -175.5(6) . . . . ? 
N10 C58 C59 C60 -178.8(5) . . . . ? 
C57 C58 C59 C60 0.4(8) . . . . ? 
N10 C58 C59 C64 -1.5(8) . . . . ? 
C57 C58 C59 C64 177.7(5) . . . . ? 
C59 C60 C61 C56 -1.1(10) . . . . ? 
C55 C56 C61 C60 178.5(7) . . . . ? 
C57 C56 C61 C60 -1.3(9) . . . . ? 
N10 C62 C63 C64 0.4(9) . . . . ? 
C46 N8 C52 C51 -1.2(9) . . . . ? 
C50 C51 C52 N8 3.3(9) . . . . ? 
C62 C63 C64 C59 -1.0(9) . . . . ? 
C60 C59 C64 C63 178.6(6) . . . . ? 
C58 C59 C64 C63 1.6(9) . . . . ? 
C10 C11 C12 C13 -1.6(5) . . . . ? 
C10 C11 C12 C16 174.5(3) . . . . ? 
C14 C13 C12 C11 1.4(6) . . . . ? 
C14 C13 C12 C16 -174.7(4) . . . . ? 
O7 C16 C12 C11 -18.9(4) . . . . ? 
O8 C16 C12 C11 161.9(3) . . . . ? 
Ba2 C16 C12 C11 -119.1(19) 1_455 . . . ? 
O7 C16 C12 C13 157.3(3) . . . . ? 
O8 C16 C12 C13 -21.9(5) . . . . ? 
Ba2 C16 C12 C13 57(2) 1_455 . . . ? 
C10 C15 C14 N2 -178.0(5) . . . . ? 
C10 C15 C14 C13 0.2(8) . . . . ? 
C12 C13 C14 N2 177.5(4) . . . . ? 
C12 C13 C14 C15 -0.7(7) . . . . ? 
C32 C37 C36 C35 0.3(10) . . . . ? 
C34 C35 C36 C37 -0.8(9) . . . . ? 
C38 C35 C36 C37 -179.8(7) . . . . ? 
 
loop_ 
 _geom_hbond_atom_site_label_D 
 _geom_hbond_atom_site_label_H 
 _geom_hbond_atom_site_label_A 
 _geom_hbond_distance_DH 
 _geom_hbond_distance_HA 
 _geom_hbond_distance_DA 
 _geom_hbond_angle_DHA 
 _geom_hbond_site_symmetry_A 
N1 H1A O8  0.862(19) 2.14(5) 2.847(5) 140(5) 1_646 
N1 H2A O5  0.857(19) 2.04(3) 2.858(5) 160(6) 1_546 
N2 H3A O2  0.876(18) 2.18(3) 2.996(6) 155(4) 1_464 
N2 H4A O4  0.858(18) 2.29(3) 3.104(6) 158(4) 1_564 
O1W H2W O2W  0.865(19) 2.61(5) 3.158(5) 122(4) . 
O1W H1W O2  0.877(19) 1.88(3) 2.712(4) 157(5) . 
O2W H3W O3  0.849(18) 2.00(3) 2.763(5) 150(4) 1_655 
O2W H3W O1W  0.849(18) 2.66(5) 3.158(5) 119(4) . 
O2W H4W O6  0.871(18) 1.918(19) 2.774(4) 167(4) 1_655 
O3W H5W N10  0.869(19) 2.00(2) 2.845(6) 163(5) . 
O3W H5W N9  0.869(19) 2.68(4) 3.263(7) 126(4) . 
O3W H6W O1W  0.901(19) 2.14(4) 2.827(5) 132(5) . 
O4W H7W O6W  0.893(18) 1.96(3) 2.739(4) 145(4) . 
O4W H8W N7  0.874(18) 1.97(2) 2.837(5) 169(3) . 
O5W H9W N9  0.903(18) 2.10(2) 2.967(6) 160(3) . 
O5W H9W N10  0.903(18) 2.70(3) 3.363(6) 131(3) . 
O5W H10W O1  0.877(18) 1.84(2) 2.666(4) 156(4) . 
O6W H11W O8W  0.882(18) 1.936(19) 2.809(5) 170(4) . 
O6W H12W O3  0.920(18) 1.82(2) 2.720(5) 164(4) . 
O7W H13W N8  0.907(19) 2.01(3) 2.856(7) 154(4) . 
O7W H14W O8W  0.912(19) 2.15(5) 2.840(7) 131(5) . 
O7W H14W O4W  0.912(19) 2.63(6) 3.067(4) 110(5) . 
O8W H15W O7W  0.916(19) 1.96(3) 2.840(7) 160(5) . 
O8W H16W O2W  0.898(19) 2.65(5) 3.160(6) 117(4) 1_455 
O9W H17W O3W  0.933(19) 1.83(3) 2.719(7) 158(7) 1_545 
O9W H18W O6  0.933(19) 2.16(3) 3.076(7) 168(6) 1_645 
 
_diffrn_measured_fraction_theta_max    0.993 
_diffrn_reflns_theta_full              27.48 
_diffrn_measured_fraction_theta_full   0.993 
_refine_diff_density_max    0.845 
_refine_diff_density_min   -0.410 
_refine_diff_density_rms    0.078 


#============================================================================#
#      Luis Cunha-Silva @ REQUIMTE & DQB FCUP  *  30/01/2020  *   END        #
#============================================================================#
