# Supplementary material for: From Discrete Complexes to Metal–Organic Layered Materials: Remarkable Hydrogen Bonding Frameworks
Source: Molecules. 2020 Mar 16;25(6):1353. doi: 10.3390/molecules25061353 (PMC7146137; doi:10.3390/molecules25061353)
Supplement: Supplementary file 1 [file molecules-25-01353-s001.zip › 6_LCS3712.CIF]

data_general

_publ_contact_author_name         'Dr Lu\'is Cunha Silva'
_publ_contact_author_address
; LAQV/REQUIMTE & Dep. of Chemistry and Biochemistry
  Faculty of Sciences
  University of Porto
  4169-007 Porto
  Portugal
;

_publ_contact_author_email        'l.cunha.silva@fc.up.pt'
_publ_contact_author_fax          '+351 220402576'
_publ_contact_author_phone        '+351 220402659'

_journal_name_full                'Molecules'

loop_
_publ_author_name
_publ_author_footnote
_publ_author_address

'Carla, Queir\\'os'  .
; LAQV/REQUIMTE & Dep. of Chemistry and Biochemistry
  Faculty of Sciences
  University of Porto
  4169-007 Porto
  Portugal
; 

'Silva, Ana M. G.'  .
; LAQV/REQUIMTE & Dep. of Chemistry and Biochemistry
  Faculty of Sciences
  University of Porto
  4169-007 Porto
  Portugal
;

'Castro, Baltazar de'  .
; LAQV/REQUIMTE & Dep. of Chemistry and Biochemistry
  Faculty of Sciences
  University of Porto
  4169-007 Porto
  Portugal
;

'Cunha-Silva, Lu\'is'  .
; LAQV/REQUIMTE & Dep. of Chemistry and Biochemistry
  Faculty of Sciences
  University of Porto
  4169-007 Porto
  Portugal
;

 
data_lcs3712 
 
# ========================================================================= #
 
_audit_creation_method            'SHELXL-97, manual editing plus enCIFer'
_audit_creation_date              '12 March 2014'

# ========================================================================= #

_chemical_name_systematic 
; 
 ? 
; 
_chemical_name_common             ? 
_chemical_melting_point           ? 
_chemical_formula_moiety          'C8 H7 Ba N O5' 
_chemical_formula_sum             'C8 H7 Ba N O5' 
_chemical_formula_weight          334.49 
 
loop_ 
 _atom_type_symbol 
 _atom_type_description 
 _atom_type_scat_dispersion_real 
 _atom_type_scat_dispersion_imag 
 _atom_type_scat_source 
 'C'  'C'   0.0033   0.0016 
 'International Tables Vol C Tables 4.2.6.8 and 6.1.1.4' 
 'H'  'H'   0.0000   0.0000 
 'International Tables Vol C Tables 4.2.6.8 and 6.1.1.4' 
 'N'  'N'   0.0061   0.0033 
 'International Tables Vol C Tables 4.2.6.8 and 6.1.1.4' 
 'O'  'O'   0.0106   0.0060 
 'International Tables Vol C Tables 4.2.6.8 and 6.1.1.4' 
 'Ba'  'Ba'  -0.3244   2.2819 
 'International Tables Vol C Tables 4.2.6.8 and 6.1.1.4' 
 
_symmetry_cell_setting            Triclinic 
_symmetry_space_group_name_H-M    'P -1' 
_symmetry_space_group_name_Hall   '-P 1'
 
loop_ 
 _symmetry_equiv_pos_as_xyz 
 'x, y, z' 
 '-x, -y, -z' 
 
_cell_length_a                    7.76210(10) 
_cell_length_b                    7.96520(10) 
_cell_length_c                    8.34160(10) 
_cell_angle_alpha                 79.6180(10) 
_cell_angle_beta                  65.5740(10) 
_cell_angle_gamma                 83.5750(10) 
_cell_volume                      461.483(10) 
_cell_formula_units_Z             2 
_cell_measurement_temperature     150(2) 
_cell_measurement_reflns_used     5740 
_cell_measurement_theta_min       2.60 
_cell_measurement_theta_max       29.07 
 
_exptl_crystal_description        prism 
_exptl_crystal_colour             colourless 
_exptl_crystal_size_max           0.19 
_exptl_crystal_size_mid           0.07 
_exptl_crystal_size_min           0.06 
_exptl_crystal_density_meas       ? 
_exptl_crystal_density_diffrn     2.407 
_exptl_crystal_density_method     'not measured' 
_exptl_crystal_F_000              316 
_exptl_absorpt_coefficient_mu     4.303 
_exptl_absorpt_correction_type    multi-scan 
_exptl_absorpt_correction_T_min   0.4953 
_exptl_absorpt_correction_T_max   0.7823 
_exptl_absorpt_process_details    
;
 SADABS (Sheldrick, 1997)
; 
 
 
_exptl_special_details 
; 
 ? 
; 
 
_diffrn_ambient_temperature       150(2) 
_diffrn_radiation_wavelength      0.71073 
_diffrn_radiation_type            MoK\a 
_diffrn_radiation_source          'fine-focus sealed tube' 
_diffrn_radiation_monochromator   graphite 
_diffrn_measurement_device_type   'Bruker X8 Kappa CCD APEX II'
_diffrn_measurement_method        'omega/phi scans'
_diffrn_detector_area_resol_mean  ? 
_diffrn_standards_number          ? 
_diffrn_standards_interval_count  ? 
_diffrn_standards_interval_time   ? 
_diffrn_standards_decay_%         ? 
_diffrn_reflns_number             7516 
_diffrn_reflns_av_R_equivalents   0.0225 
_diffrn_reflns_av_sigmaI/netI     0.0240 
_diffrn_reflns_limit_h_min        -6 
_diffrn_reflns_limit_h_max        10 
_diffrn_reflns_limit_k_min        -10 
_diffrn_reflns_limit_k_max        10 
_diffrn_reflns_limit_l_min        -9 
_diffrn_reflns_limit_l_max        10 
_diffrn_reflns_theta_min          3.67 
_diffrn_reflns_theta_max          27.46 
_reflns_number_total              2099 
_reflns_number_gt                 2014 
_reflns_threshold_expression      >2sigma(I) 
 
_computing_data_collection        'APEX2 (Bruker, 2006)' 
_computing_cell_refinement        'APEX2 '
_computing_data_reduction         'SAINT+ (Bruker, 1997-2005)' 
_computing_structure_solution     'SHELXTL (Bruker 2001)' 
_computing_structure_refinement   'SHELXTL '
_computing_molecular_graphics     'SHELXTL ' 
_computing_publication_material   'SHELXTL ' 
 
_refine_special_details 
; 
 Refinement of F^2^ against ALL reflections.  The weighted R-factor wR and 
 goodness of fit S are based on F^2^, conventional R-factors R are based 
 on F, with F set to zero for negative F^2^. The threshold expression of 
 F^2^ > 2sigma(F^2^) is used only for calculating R-factors(gt) etc. and is 
 not relevant to the choice of reflections for refinement.  R-factors based 
 on F^2^ are statistically about twice as large as those based on F, and R- 
 factors based on ALL data will be even larger. 
; 
 
_refine_ls_structure_factor_coef  Fsqd  
_refine_ls_matrix_type            full 
_refine_ls_weighting_scheme       calc  
_refine_ls_weighting_details 
 'calc w=1/[\s^2^(Fo^2^)+(0.0119P)^2^+0.2920P] where P=(Fo^2^+2Fc^2^)/3' 
_atom_sites_solution_primary      direct 
_atom_sites_solution_secondary    difmap 
_atom_sites_solution_hydrogens    geom 
_refine_ls_hydrogen_treatment     mixed 
_refine_ls_extinction_method      none 
_refine_ls_extinction_coef        ? 
_refine_ls_number_reflns          2099 
_refine_ls_number_parameters      148 
_refine_ls_number_restraints      5 
_refine_ls_R_factor_all           0.0163 
_refine_ls_R_factor_gt            0.0152 
_refine_ls_wR_factor_ref          0.0321 
_refine_ls_wR_factor_gt           0.0316 
_refine_ls_goodness_of_fit_ref    1.034 
_refine_ls_restrained_S_all       1.034 
_refine_ls_shift/su_max           0.000 
_refine_ls_shift/su_mean          0.000 
 
loop_ 
 _atom_site_label 
 _atom_site_type_symbol 
 _atom_site_fract_x 
 _atom_site_fract_y 
 _atom_site_fract_z 
 _atom_site_U_iso_or_equiv 
 _atom_site_adp_type 
 _atom_site_occupancy 
 _atom_site_symmetry_multiplicity 
 _atom_site_calc_flag 
 _atom_site_refinement_flags 
 _atom_site_disorder_assembly 
 _atom_site_disorder_group 
Ba1 Ba 0.048355(17) 0.598106(14) 0.212330(14) 0.01066(5) Uani 1 1 d . . . 
O1 O 0.2213(2) 0.27845(17) 0.18096(18) 0.0161(3) Uani 1 1 d . . . 
O2 O 0.1389(2) 0.32156(18) 0.45855(18) 0.0167(3) Uani 1 1 d . . . 
O3 O 0.2583(2) -0.17452(18) 0.89514(19) 0.0168(3) Uani 1 1 d . . . 
O4 O 0.2053(2) -0.42435(17) 0.84374(18) 0.0143(3) Uani 1 1 d . . . 
O1W O -0.1788(2) 0.82854(19) 0.0972(2) 0.0200(3) Uani 1 1 d D . . 
H1W H -0.213(4) 0.935(2) 0.107(3) 0.030 Uiso 1 1 d D . . 
H2W H -0.191(4) 0.802(3) 0.005(3) 0.030 Uiso 1 1 d D . . 
N1 N 0.4323(3) -0.3476(2) 0.1702(2) 0.0134(4) Uani 1 1 d D . . 
H1A H 0.483(3) -0.295(3) 0.064(2) 0.020 Uiso 1 1 d D . . 
H2A H 0.508(3) -0.427(3) 0.187(3) 0.020 Uiso 1 1 d D . . 
C1 C 0.2028(3) 0.2260(3) 0.3389(3) 0.0122(4) Uani 1 1 d . . . 
C2 C 0.2563(3) 0.0423(2) 0.3868(3) 0.0116(4) Uani 1 1 d . . . 
C7 C 0.2374(3) -0.0212(3) 0.5596(3) 0.0128(4) Uani 1 1 d . . . 
H7 H 0.1976 0.0532 0.6467 0.015 Uiso 1 1 calc R . . 
C6 C 0.2769(3) -0.1937(3) 0.6050(3) 0.0115(4) Uani 1 1 d . . . 
C5 C 0.3401(3) -0.3010(3) 0.4757(3) 0.0118(4) Uani 1 1 d . . . 
H5 H 0.3627 -0.4194 0.5078 0.014 Uiso 1 1 calc R . . 
C4 C 0.3707(3) -0.2368(3) 0.2993(3) 0.0114(4) Uani 1 1 d . . . 
C3 C 0.3247(3) -0.0654(3) 0.2571(3) 0.0121(4) Uani 1 1 d . . . 
H3 H 0.3401 -0.0212 0.1386 0.014 Uiso 1 1 calc R . . 
C8 C 0.2458(3) -0.2669(3) 0.7938(3) 0.0123(4) Uani 1 1 d . . . 
 
loop_ 
 _atom_site_aniso_label 
 _atom_site_aniso_U_11 
 _atom_site_aniso_U_22 
 _atom_site_aniso_U_33 
 _atom_site_aniso_U_23 
 _atom_site_aniso_U_13 
 _atom_site_aniso_U_12 
Ba1 0.01513(7) 0.00894(7) 0.00799(7) -0.00158(5) -0.00521(5) 0.00199(5) 
O1 0.0278(9) 0.0108(7) 0.0093(7) -0.0016(6) -0.0081(6) 0.0042(6) 
O2 0.0251(9) 0.0126(7) 0.0113(7) -0.0042(6) -0.0069(6) 0.0054(6) 
O3 0.0281(9) 0.0120(7) 0.0131(7) -0.0021(6) -0.0109(7) -0.0014(6) 
O4 0.0210(8) 0.0091(7) 0.0124(7) 0.0006(6) -0.0071(6) -0.0011(6) 
O1W 0.0310(9) 0.0133(8) 0.0235(9) -0.0073(7) -0.0189(7) 0.0068(7) 
N1 0.0180(10) 0.0108(9) 0.0103(9) -0.0023(7) -0.0055(8) 0.0042(7) 
C1 0.0143(10) 0.0111(10) 0.0097(10) -0.0009(8) -0.0039(8) 0.0006(8) 
C2 0.0127(10) 0.0095(10) 0.0123(10) -0.0007(8) -0.0052(8) -0.0001(8) 
C7 0.0165(11) 0.0115(10) 0.0099(10) -0.0023(8) -0.0049(8) 0.0007(8) 
C6 0.0110(10) 0.0129(10) 0.0105(10) -0.0008(8) -0.0045(8) -0.0012(8) 
C5 0.0127(10) 0.0097(10) 0.0120(10) 0.0000(8) -0.0049(8) 0.0005(8) 
C4 0.0097(10) 0.0132(10) 0.0121(10) -0.0048(8) -0.0044(8) 0.0015(8) 
C3 0.0131(10) 0.0138(10) 0.0083(9) 0.0003(8) -0.0042(8) -0.0001(8) 
C8 0.0116(10) 0.0122(10) 0.0122(10) 0.0000(8) -0.0054(8) 0.0024(8) 
 
_geom_special_details 
; 
 All esds (except the esd in the dihedral angle between two l.s. planes) 
 are estimated using the full covariance matrix.  The cell esds are taken 
 into account individually in the estimation of esds in distances, angles 
 and torsion angles; correlations between esds in cell parameters are only 
 used when they are defined by crystal symmetry.  An approximate (isotropic) 
 treatment of cell esds is used for estimating esds involving l.s. planes. 
; 
 
loop_ 
 _geom_bond_atom_site_label_1 
 _geom_bond_atom_site_label_2 
 _geom_bond_distance 
 _geom_bond_site_symmetry_2 
 _geom_bond_publ_flag 
Ba1 O2 2.6802(14) 2_566 ? 
Ba1 O1W 2.7276(15) . ? 
Ba1 O1 2.7456(14) . ? 
Ba1 O4 2.7594(15) 2_556 ? 
Ba1 O4 2.8321(14) 1_564 ? 
Ba1 O3 2.8815(14) 1_564 ? 
Ba1 N1 2.9255(19) 1_565 ? 
Ba1 O2 2.9632(14) . ? 
O1 C1 1.261(2) . ? 
O2 C1 1.265(2) . ? 
O2 Ba1 2.6802(14) 2_566 ? 
O3 C8 1.254(2) . ? 
O3 Ba1 2.8815(14) 1_546 ? 
O4 C8 1.280(2) . ? 
O4 Ba1 2.7594(14) 2_556 ? 
O4 Ba1 2.8321(14) 1_546 ? 
O1W H1W 0.869(16) . ? 
O1W H2W 0.882(16) . ? 
N1 C4 1.410(3) . ? 
N1 Ba1 2.9255(19) 1_545 ? 
N1 H1A 0.855(16) . ? 
N1 H2A 0.848(16) . ? 
C1 C2 1.505(3) . ? 
C2 C7 1.391(3) . ? 
C2 C3 1.394(3) . ? 
C7 C6 1.393(3) . ? 
C7 H7 0.9500 . ? 
C6 C5 1.391(3) . ? 
C6 C8 1.505(3) . ? 
C5 C4 1.397(3) . ? 
C5 H5 0.9500 . ? 
C4 C3 1.392(3) . ? 
C3 H3 0.9500 . ? 
 
loop_ 
 _geom_angle_atom_site_label_1 
 _geom_angle_atom_site_label_2 
 _geom_angle_atom_site_label_3 
 _geom_angle 
 _geom_angle_site_symmetry_1 
 _geom_angle_site_symmetry_3 
 _geom_angle_publ_flag 
O2 Ba1 O1W 89.62(5) 2_566 . ? 
O2 Ba1 O1 117.49(4) 2_566 . ? 
O1W Ba1 O1 143.23(4) . . ? 
O2 Ba1 O4 105.02(5) 2_566 2_556 ? 
O1W Ba1 O4 70.96(4) . 2_556 ? 
O1 Ba1 O4 77.89(4) . 2_556 ? 
O2 Ba1 O4 167.88(4) 2_566 1_564 ? 
O1W Ba1 O4 78.55(4) . 1_564 ? 
O1 Ba1 O4 74.32(4) . 1_564 ? 
O4 Ba1 O4 73.74(5) 2_556 1_564 ? 
O2 Ba1 O3 126.74(4) 2_566 1_564 ? 
O1W Ba1 O3 67.07(5) . 1_564 ? 
O1 Ba1 O3 107.97(4) . 1_564 ? 
O4 Ba1 O3 110.48(4) 2_556 1_564 ? 
O4 Ba1 O3 45.82(4) 1_564 1_564 ? 
O2 Ba1 N1 98.12(5) 2_566 1_565 ? 
O1W Ba1 N1 126.21(5) . 1_565 ? 
O1 Ba1 N1 76.83(5) . 1_565 ? 
O4 Ba1 N1 151.54(5) 2_556 1_565 ? 
O4 Ba1 N1 86.97(4) 1_564 1_565 ? 
O3 Ba1 N1 65.96(5) 1_564 1_565 ? 
O2 Ba1 O2 72.96(5) 2_566 . ? 
O1W Ba1 O2 156.12(5) . . ? 
O1 Ba1 O2 45.44(4) . . ? 
O4 Ba1 O2 97.40(4) 2_556 . ? 
O4 Ba1 O2 119.12(4) 1_564 . ? 
O3 Ba1 O2 136.59(4) 1_564 . ? 
N1 Ba1 O2 73.61(5) 1_565 . ? 
O2 Ba1 C8 147.16(5) 2_566 1_564 ? 
C1 O1 Ba1 101.10(12) . . ? 
C1 O2 Ba1 156.80(13) . 2_566 ? 
C1 O2 Ba1 90.61(11) . . ? 
Ba1 O2 Ba1 107.04(5) 2_566 . ? 
C8 O3 Ba1 93.25(12) . 1_546 ? 
C8 O4 Ba1 128.72(12) . 2_556 ? 
C8 O4 Ba1 94.96(11) . 1_546 ? 
Ba1 O4 Ba1 106.26(5) 2_556 1_546 ? 
Ba1 O1W H1W 134.2(17) . . ? 
Ba1 O1W H2W 112.6(16) . . ? 
H1W O1W H2W 110(2) . . ? 
C4 N1 Ba1 93.81(12) . 1_545 ? 
C4 N1 H1A 112.7(16) . . ? 
Ba1 N1 H1A 103.6(17) 1_545 . ? 
C4 N1 H2A 113.2(17) . . ? 
Ba1 N1 H2A 123.7(17) 1_545 . ? 
H1A N1 H2A 109(2) . . ? 
O1 C1 O2 122.40(18) . . ? 
O1 C1 C2 118.55(17) . . ? 
O2 C1 C2 119.04(17) . . ? 
C7 C2 C3 119.74(18) . . ? 
C7 C2 C1 120.48(18) . . ? 
C3 C2 C1 119.79(17) . . ? 
C2 C7 C6 120.01(19) . . ? 
C2 C7 H7 120.0 . . ? 
C6 C7 H7 120.0 . . ? 
C5 C6 C7 119.73(18) . . ? 
C5 C6 C8 119.46(17) . . ? 
C7 C6 C8 120.77(18) . . ? 
C6 C5 C4 120.80(18) . . ? 
C6 C5 H5 119.6 . . ? 
C4 C5 H5 119.6 . . ? 
C3 C4 C5 118.74(18) . . ? 
C3 C4 N1 120.90(17) . . ? 
C5 C4 N1 120.16(18) . . ? 
C4 C3 C2 120.81(18) . . ? 
C4 C3 H3 119.6 . . ? 
C2 C3 H3 119.6 . . ? 
O3 C8 O4 122.80(18) . . ? 
O3 C8 C6 120.29(18) . . ? 
O4 C8 C6 116.91(17) . . ? 
 
loop_ 
 _geom_torsion_atom_site_label_1 
 _geom_torsion_atom_site_label_2 
 _geom_torsion_atom_site_label_3 
 _geom_torsion_atom_site_label_4 
 _geom_torsion 
 _geom_torsion_site_symmetry_1 
 _geom_torsion_site_symmetry_2 
 _geom_torsion_site_symmetry_3 
 _geom_torsion_site_symmetry_4 
 _geom_torsion_publ_flag 
O2 Ba1 O1 C1 -8.82(14) 2_566 . . . ? 
O1W Ba1 O1 C1 -141.97(12) . . . . ? 
O4 Ba1 O1 C1 -109.61(13) 2_556 . . . ? 
O4 Ba1 O1 C1 174.11(13) 1_564 . . . ? 
O3 Ba1 O1 C1 142.54(12) 1_564 . . . ? 
N1 Ba1 O1 C1 83.57(13) 1_565 . . . ? 
O2 Ba1 O1 C1 3.73(11) . . . . ? 
C8 Ba1 O1 C1 161.08(13) 1_564 . . . ? 
C4 Ba1 O1 C1 67.45(13) 1_565 . . . ? 
Ba1 Ba1 O1 C1 -147.99(13) 2_565 . . . ? 
O2 Ba1 O2 C1 164.72(15) 2_566 . . . ? 
O1W Ba1 O2 C1 119.91(14) . . . . ? 
O1 Ba1 O2 C1 -3.65(11) . . . . ? 
O4 Ba1 O2 C1 61.21(12) 2_556 . . . ? 
O4 Ba1 O2 C1 -14.27(13) 1_564 . . . ? 
O3 Ba1 O2 C1 -69.38(13) 1_564 . . . ? 
N1 Ba1 O2 C1 -91.15(12) 1_565 . . . ? 
C8 Ba1 O2 C1 -36.37(14) 1_564 . . . ? 
C4 Ba1 O2 C1 -116.92(12) 1_565 . . . ? 
Ba1 Ba1 O2 C1 25.70(12) 2_565 . . . ? 
O2 Ba1 O2 Ba1 0.0 2_566 . . 2_566 ? 
O1W Ba1 O2 Ba1 -44.80(13) . . . 2_566 ? 
O1 Ba1 O2 Ba1 -168.37(9) . . . 2_566 ? 
O4 Ba1 O2 Ba1 -103.51(5) 2_556 . . 2_566 ? 
O4 Ba1 O2 Ba1 -178.98(4) 1_564 . . 2_566 ? 
O3 Ba1 O2 Ba1 125.90(5) 1_564 . . 2_566 ? 
N1 Ba1 O2 Ba1 104.13(6) 1_565 . . 2_566 ? 
C8 Ba1 O2 Ba1 158.91(6) 1_564 . . 2_566 ? 
C1 Ba1 O2 Ba1 -164.72(15) . . . 2_566 ? 
C4 Ba1 O2 Ba1 78.36(6) 1_565 . . 2_566 ? 
Ba1 Ba1 O2 Ba1 -139.02(4) 2_565 . . 2_566 ? 
Ba1 O1 C1 O2 -7.4(2) . . . . ? 
Ba1 O1 C1 C2 171.67(15) . . . . ? 
Ba1 O2 C1 O1 147.0(2) 2_566 . . . ? 
Ba1 O2 C1 O1 6.7(2) . . . . ? 
Ba1 O2 C1 C2 -32.1(4) 2_566 . . . ? 
Ba1 O2 C1 C2 -172.34(17) . . . . ? 
Ba1 O2 C1 Ba1 140.2(3) 2_566 . . . ? 
O2 Ba1 C1 O1 172.15(13) 2_566 . . . ? 
O1W Ba1 C1 O1 70.71(19) . . . . ? 
O4 Ba1 C1 O1 67.40(13) 2_556 . . . ? 
O4 Ba1 C1 O1 -5.71(13) 1_564 . . . ? 
O3 Ba1 C1 O1 -44.95(14) 1_564 . . . ? 
N1 Ba1 C1 O1 -90.80(13) 1_565 . . . ? 
O2 Ba1 C1 O1 -173.2(2) . . . . ? 
C8 Ba1 C1 O1 -20.92(14) 1_564 . . . ? 
C4 Ba1 C1 O1 -113.14(13) 1_565 . . . ? 
Ba1 Ba1 C1 O1 30.39(12) 2_565 . . . ? 
O2 Ba1 C1 O2 -14.66(14) 2_566 . . . ? 
O1W Ba1 C1 O2 -116.10(15) . . . . ? 
O1 Ba1 C1 O2 173.2(2) . . . . ? 
O4 Ba1 C1 O2 -119.41(12) 2_556 . . . ? 
O4 Ba1 C1 O2 167.48(12) 1_564 . . . ? 
O3 Ba1 C1 O2 128.24(11) 1_564 . . . ? 
N1 Ba1 C1 O2 82.39(12) 1_565 . . . ? 
C8 Ba1 C1 O2 152.27(11) 1_564 . . . ? 
C4 Ba1 C1 O2 60.06(12) 1_565 . . . ? 
Ba1 Ba1 C1 O2 -156.42(11) 2_565 . . . ? 
O1 C1 C2 C7 -179.72(19) . . . . ? 
O2 C1 C2 C7 -0.6(3) . . . . ? 
O1 C1 C2 C3 0.1(3) . . . . ? 
O2 C1 C2 C3 179.18(19) . . . . ? 
C3 C2 C7 C6 -3.5(3) . . . . ? 
C1 C2 C7 C6 176.31(19) . . . . ? 
C2 C7 C6 C5 1.7(3) . . . . ? 
C2 C7 C6 C8 -176.19(19) . . . . ? 
C7 C6 C5 C4 2.2(3) . . . . ? 
C8 C6 C5 C4 -179.85(18) . . . . ? 
C6 C5 C4 C3 -4.3(3) . . . . ? 
C6 C5 C4 N1 -179.13(18) . . . . ? 
C6 C5 C4 Ba1 -113.04(18) . . . 1_545 ? 
Ba1 N1 C4 C3 -81.00(19) 1_545 . . . ? 
Ba1 N1 C4 C5 93.75(18) 1_545 . . . ? 
C5 C4 C3 C2 2.5(3) . . . . ? 
N1 C4 C3 C2 177.29(19) . . . . ? 
Ba1 C4 C3 C2 116.49(18) 1_545 . . . ? 
C7 C2 C3 C4 1.4(3) . . . . ? 
C1 C2 C3 C4 -178.42(19) . . . . ? 
Ba1 O3 C8 O4 -18.6(2) 1_546 . . . ? 
Ba1 O3 C8 C6 160.79(16) 1_546 . . . ? 
Ba1 O4 C8 O3 134.40(17) 2_556 . . . ? 
Ba1 O4 C8 O3 18.9(2) 1_546 . . . ? 
Ba1 O4 C8 C6 -45.0(2) 2_556 . . . ? 
Ba1 O4 C8 C6 -160.43(15) 1_546 . . . ? 
Ba1 O4 C8 Ba1 115.45(14) 2_556 . . 1_546 ? 
C5 C6 C8 O3 153.5(2) . . . . ? 
C7 C6 C8 O3 -28.6(3) . . . . ? 
C5 C6 C8 O4 -27.1(3) . . . . ? 
C7 C6 C8 O4 150.8(2) . . . . ? 
C5 C6 C8 Ba1 -107.7(4) . . . 1_546 ? 
C7 C6 C8 Ba1 70.2(5) . . . 1_546 ? 
 
loop_ 
 _geom_hbond_atom_site_label_D 
 _geom_hbond_atom_site_label_H 
 _geom_hbond_atom_site_label_A 
 _geom_hbond_distance_DH 
 _geom_hbond_distance_HA 
 _geom_hbond_distance_DA 
 _geom_hbond_angle_DHA 
 _geom_hbond_site_symmetry_A 
O1W H1W O3  0.869(16) 1.898(16) 2.762(2) 173(3) 2_566 
O1W H2W O1  0.882(16) 1.884(16) 2.762(2) 174(2) 2_565 
N1 H1A O1  0.855(16) 2.35(2) 3.058(2) 140(2) 2_655 
N1 H2A O4  0.848(16) 2.338(18) 3.145(2) 159(2) 2_646 
 
_diffrn_measured_fraction_theta_max    0.992 
_diffrn_reflns_theta_full              27.46 
_diffrn_measured_fraction_theta_full   0.992 
_refine_diff_density_max    0.454 
_refine_diff_density_min   -0.420 
_refine_diff_density_rms    0.090 

#============================================================================#
#      Luis Cunha-Silva @ REQUIMTE & DQB FCUP  *  31/01/2020  *   END        #
#============================================================================#
